# Supplementary material for: Autotrophic growth of E. coli is achieved by a small number of genetic changes
Source: bioRxiv preprint, doi:10.1101/2023.06.03.543535, version 3 (2024-01-03)
Supplement: DataS4 [file 543535_file10.xlsx]

## Sheet: Sheet1
C5	83 1:10 45mM 5%
C6	83 1:10 45mM 5%
C7	83 1:10 45mM 5%
D5	66 1:10 45mM 5%
D6	66 1:10 45mM 5%
D7	66 1:10 45mM 5%
