# Supplementary material for: Autotrophic growth of E. coli is achieved by a small number of genetic changes
Source: bioRxiv preprint, doi:10.1101/2023.06.03.543535, version 3 (2024-01-03)
Supplement: DataS11 [file 543535_file02.xlsx]

## Sheet: Sheet1
B3	WT + FDH66 High CO2 0 For
B4	WT + FDH66 High CO2 0 For
B5	WT + FDH66 High CO2 0 For
B6	WT + FDH66 High CO2 0 For
D3	DM + FDH66 High CO2 0 For
D4	DM + FDH66 High CO2 0 For
D5	DM + FDH66 High CO2 0 For
D6	DM + FDH66 High CO2 0 For
