# Supplementary material for: Autotrophic growth of E. coli is achieved by a small number of genetic changes
Source: bioRxiv preprint, doi:10.1101/2023.06.03.543535, version 3 (2024-01-03)
Supplement: DataS14 [file 543535_file05.xlsx]

## Sheet: RM_13168_HFX_run2_100521
Protein IDs	Majority protein IDs	Protein names	Gene names	Fasta headers	Peptides	Unique peptides	p-value Strain2/ Strain1	q-value Strain2/ Strain1	Ratio Strain2/ Strain1	p-value Strain4/ Strain1	q-value Strain4/ Strain1	Ratio Strain4/ Strain1	p-value Strain5/ Strain1	q-value Strain5/ Strain1	Ratio Strain5/ Strain1	p-value Strain6/ Strain1	q-value Strain6/ Strain1	Ratio Strain6/ Strain1	p-value Strain7/ Strain1	q-value Strain7/ Strain1	Ratio Strain7/ Strain1	p-value Strain9/ Strain1	q-value Strain9/ Strain1	Ratio Strain9/ Strain1	Intensity: 1A chiA KO	Intensity: 1B chiA KO	Intensity: 1C chiA KO	Intensity: 2A yjaH KO	Intensity: 2B yjaH KO	Intensity: 2C yjaH KO	Intensity: 3A yjaH KO, rpoB A1245V	Intensity: 3B yjaH KO, rpoB A1245V	Intensity: 3C yjaH KO, rpoB A1245V	Intensity: 4A chiA KO, yjaH KO, crp H22N, rpoB A1245V	Intensity: 4B chiA KO, yjaH KO, crp H22N, rpoB A1245V	Intensity: 4C chiA KO, yjaH KO, crp H22N, rpoB A1245V	Intensity: 5A chiA KO, crp H22N	Intensity: 5B chiA KO, crp H22N	Intensity: 5C chiA KO, crp H22N	Sequence coverage [%]	Mol. weight [kDa]	Q-value	Score
P07017	P07017	Methyl-accepting chemotaxis protein II	tar	sp|P07017|MCP2_ECOLI Methyl-accepting chemotaxis protein II OS=Escherichia coli (strain K12) OX=83333 GN=tar PE=1 SV=2	4	4	3.26213e-06	0	5.55306	0.281783	0.226875	1.72576	0.953831	0.973977	0.991516	0.0056913	0.00859557	1.92914	0.132012	0.164085	0.729018	0.706009	0.802397	0.808429	2253272	2321549	2204377	13675010	12215000	11821000	5457881	3609523	4202375	2298765	1394302	1393930	4823512	1584521	797152	9.4	59.943	0	4.0873
P42604	P42604	Altronate dehydratase	uxaA	sp|P42604|UXAA_ECOLI Altronate dehydratase OS=Escherichia coli (strain K12) OX=83333 GN=uxaA PE=1 SV=3	8	8	6.11481e-05	0.102	0.791803	4.81416e-06	0	0.351218	0.000477148	0.00356989	0.389761	0.00338838	0.00617918	0.509113	0.0136268	0.0259345	0.430662	0.000232941	0.004	0.4576	28739990	27746990	27893010	21944990	22493010	22370000	16939000	14799000	11709010	14989000	8121398	14595000	11937010	12285000	14534000	17.6	54.092	0	8.8834
P68206	P68206	UPF0337 protein YjbJ	yjbJ	sp|P68206|YJBJ_ECOLI UPF0337 protein YjbJ OS=Escherichia coli (strain K12) OX=83333 GN=yjbJ PE=1 SV=1	9	9	0.000164323	0.133333	1.50179	2.22993e-06	0	2.73053	0.00128803	0.00563871	3.65839	0.000453059	0.00145856	2.54272	0.440071	0.604335	1.4112	0.00139806	0.00971765	2.80377	462249900	443690200	432759900	643500400	695880200	671350400	1093301000	1336599000	998519900	420940300	1405901000	421499900	1002599000	1568999000	1243601000	69.6	8.3252	0	323.31
P76506	P76506	Probable phospholipid-binding lipoprotein MlaA	mlaA	sp|P76506|MLAA_ECOLI Intermembrane phospholipid transport system lipoprotein MlaA OS=Escherichia coli (strain K12) OX=83333 GN=mlaA PE=1 SV=1	8	8	0.000181992	0.1	1.16803	0.0119291	0.012337	1.38563	0.0133175	0.015672	1.56838	0.0134405	0.0148487	1.2395	0.429374	0.589636	1.50284	0.0730865	0.0886709	1.30279	127459900	124390000	123200000	147420000	144519900	146100000	141890100	168600000	155489900	130730000	471629900	107530000	139380100	200920100	154230000	40.2	28.041	0	82.994
P04949	P04949	Flagellin	fliC	sp|P04949|FLIC_ECOLI Flagellin OS=Escherichia coli (strain K12) OX=83333 GN=fliC PE=1 SV=2	5	5	0.000362944	0.2784	23.207	0.0754303	0.0540485	2.55498	0.313354	0.283959	1.37031	0.76243	0.852326	1.17075	0.420085	0.580645	1.50886	0.612954	0.721944	0.792044	1991185	2634915	1047157	43048990	44381990	35939990	1578101	4566025	1223504	2479515	1463131	5202247	1362896	2489695	804506	13.9	51.294	0	65.205
P0AE91	P0AE91	Protein CreA	creA	sp|P0AE91|CREA_ECOLI Protein CreA OS=Escherichia coli (strain K12) OX=83333 GN=creA PE=3 SV=1	3	3	0.000629471	0.308667	1.16954	0.00128652	0.00250681	1.29348	0.0126447	0.0152033	1.53672	0.0107083	0.0130289	1.10789	0.0111074	0.0213733	2.05504	0.00778943	0.0172369	1.47791	42287020	42490000	44394020	50677000	49906990	50453980	46179000	48806030	48127020	73344010	121760000	77518970	55123990	64951000	71918010	22.3	17.108	0	40.497
P0A8R0	P0A8R0	Regulator of ribonuclease activity A	rraA	sp|P0A8R0|RRAA_ECOLI Regulator of ribonuclease activity A OS=Escherichia coli (strain K12) OX=83333 GN=rraA PE=1 SV=1	6	6	0.00095904	0.377714	1.13308	0.000560849	0.00260163	1.81094	0.00155141	0.00566967	1.51077	0.000174815	0.00242202	1.18637	0.268632	0.339547	1.63113	0.00203272	0.0108829	1.60026	421370100	425870100	418229900	477799800	489210100	467090100	490659700	510649900	500169700	508880100	1467000000	436290000	635979800	769529600	628430000	50.9	17.36	0	54.45
P76342	P76342	Sulfoxide reductase catalytic subunit YedY	yedY	sp|P76342|MSRP_ECOLI Protein-methionine-sulfoxide reductase catalytic subunit MsrP OS=Escherichia coli (strain K12) OX=83333 GN=msrP PE=1 SV=1	10	10	0.00159873	0.419	1.61582	4.74341e-05	0	2.38652	0.000714755	0.00393043	2.87616	0.158344	0.136372	0.892379	0.459724	0.628053	1.07995	0.00149306	0.0104176	1.58845	26852990	25286990	28226990	38783980	45534010	45787000	23452990	26592010	21840010	28816990	33743990	24827000	38783980	42900020	46171000	35.3	37.368	0	33.356
P11446	P11446	N-acetyl-gamma-glutamyl-phosphate reductase	argC	sp|P11446|ARGC_ECOLI N-acetyl-gamma-glutamyl-phosphate reductase OS=Escherichia coli (strain K12) OX=83333 GN=argC PE=1 SV=1	3	3	0.00181821	0.431556	0.761104	0.188907	0.137193	1.07567	7.94141e-05	0	0.583341	0.00346045	0.0061494	1.38777	0.000585751	0.00563855	0.70138	0.240661	0.268654	0.902914	34775980	38757020	37025000	26991020	28243010	28861980	48007990	50119970	55431000	26628000	25082990	25779010	36701010	29240990	34228980	11.7	35.952	0	12.798
P0A901	P0A901	Outer membrane lipoprotein Blc	blc	sp|P0A901|BLC_ECOLI Outer membrane lipoprotein Blc OS=Escherichia coli (strain K12) OX=83333 GN=blc PE=1 SV=1	12	12	0.0022522	0.4864	1.21941	0.000309914	0.000536082	2.01988	0.0039438	0.00744654	1.79926	0.000228275	0.0020625	1.8824	0.0282655	0.0419087	2.496	0.00555205	0.0135249	1.5347	167900000	163649900	178880000	206129900	204240000	211689900	294780000	340110100	327000100	337109900	728020400	311420100	234090000	300719900	252380000	61.6	19.851	0	63.12
P76585	P76585	Uncharacterized protein YphG	yphG	sp|P76585|YPHG_ECOLI Uncharacterized protein YphG OS=Escherichia coli (strain K12) OX=83333 GN=yphG PE=4 SV=2	5	5	0.00286476	0.524727	0.458425	0.091055	0.0646592	0.394605	0.278986	0.250487	0.596329	3.41119e-05	0	0.148377	0.0329024	0.0465081	0.369684	0.00230169	0.0120343	0.259799	5314200	5026503	6519801	2840001	2759999	2140500	909565	815880	766610	1458064	1605978	3757638	1990887	1428160	1074057	5.3	123.83	0	4.4503
P63284	P63284	Chaperone protein ClpB	clpB	sp|P63284|CLPB_ECOLI Chaperone protein ClpB OS=Escherichia coli (strain K12) OX=83333 GN=clpB PE=1 SV=1	65	65	0.0034133	0.623333	1.14208	8.23058e-06	0	2.35212	3.93407e-05	0	1.79358	3.70561e-06	0	1.86334	0.964313	0.981259	0.992923	0.000373555	0.00453933	1.40063	2718900000	2849700000	2861801000	3129199000	3280401000	3217800000	5189997000	5219696000	5295404000	3479801000	2104701000	2963700000	3774800000	4121802000	3915798000	77.8	95.584	0	323.31
P0A6H1	P0A6H1	ATP-dependent Clp protease ATP-binding subunit ClpX	clpX	sp|P0A6H1|CLPX_ECOLI ATP-dependent Clp protease ATP-binding subunit ClpX OS=Escherichia coli (strain K12) OX=83333 GN=clpX PE=1 SV=2	24	24	0.00346389	0.583385	1.11696	0.646477	0.736621	1.02683	0.0232006	0.0241769	1.06405	0.000189651	0.00235714	1.12278	0.309346	0.401316	0.895421	0.297068	0.331037	1.02903	260900000	256310100	256030000	278409900	291979900	293500200	292159900	290050100	285969800	249900100	191090100	257399800	253559900	273750100	268770000	59.9	46.355	0	322.31
P0AF93	P0AF93	2-iminobutanoate/2-iminopropanoate deaminase	ridA	sp|P0AF93|RIDA_ECOLI 2-iminobutanoate/2-iminopropanoate deaminase OS=Escherichia coli (strain K12) OX=83333 GN=ridA PE=1 SV=2	6	6	0.00346999	0.541714	1.31424	0.0139256	0.0141415	1.26651	0.000929175	0.00371321	1.74473	0.00126662	0.00282686	1.4638	0.18822	0.228637	2.55448	0.0681803	0.0850205	1.42108	579420300	499419700	546710300	700239900	722540400	709800200	766099500	792599900	817190000	1045401000	4288998000	588150000	588370100	850220300	907599600	75.8	13.611	0	112.67
P68066	P68066	Autonomous glycyl radical cofactor	grcA	sp|P68066|GRCA_ECOLI Autonomous glycyl radical cofactor OS=Escherichia coli (strain K12) OX=83333 GN=grcA PE=1 SV=1	13	11	0.00351356	0.5056	1.17268	2.64806e-06	0	0.581924	1.14929e-05	0	0.20656	0.000966504	0.00313725	0.872513	4.35824e-06	0	0.252149	5.32688e-05	0	0.533732	712509900	707470200	699609700	855259600	788140100	843710100	599369600	620209900	630140400	169790000	192840000	172669900	358579800	371650100	402350000	86.6	14.284	0	101.65
P39176	P39176	Probable L,D-transpeptidase ErfK/SrfK	erfK	sp|P39176|ERFK_ECOLI Probable L,D-transpeptidase ErfK/SrfK OS=Escherichia coli (strain K12) OX=83333 GN=erfK PE=1 SV=2	17	16	0.00385223	0.524	1.12712	0.0218126	0.0208925	1.36158	7.18279e-05	0	1.64769	0.00676889	0.00916226	1.14822	0.00743835	0.0156221	1.82831	0.0721082	0.0885793	0.693838	99535940	95764980	97508990	113609900	108840000	107630000	108170000	110760000	117440000	169119900	224399900	149680000	50870990	84552020	72179000	63.5	34.411	0	57.798
P39173	P39173	Putative glucose-6-phosphate 1-epimerase	yeaD	sp|P39173|YEAD_ECOLI Putative glucose-6-phosphate 1-epimerase OS=Escherichia coli (strain K12) OX=83333 GN=yeaD PE=1 SV=2	6	6	0.00402249	0.519529	1.20702	0.000328702	0.000522613	1.35263	0.00307511	0.00701166	1.45094	4.90663e-06	0	2.03345	0.000554761	0.00577778	2.18972	0.63725	0.744889	0.940471	54744010	56979020	54827010	63326980	68187980	69645000	115900000	109379900	113430000	128860000	104340000	133550100	43045010	65010020	50836970	31	32.666	0	60.115
P10121	P10121	Signal recognition particle receptor FtsY	ftsY	sp|P10121|FTSY_ECOLI Signal recognition particle receptor FtsY OS=Escherichia coli (strain K12) OX=83333 GN=ftsY PE=1 SV=1	24	24	0.00412191	0.502667	1.19864	0.00626944	0.00668072	1.30606	0.00107651	0.00344056	1.51288	0.00456343	0.00801724	1.23673	0.0406767	0.054245	1.11775	0.0017031	0.00948	1.40515	242110000	261100100	236640000	297960000	290859900	297260000	293520000	304290000	316820000	284009800	279100200	263539900	336190000	370780000	332949900	54.5	54.513	0	284.38
P15047	P15047	2,3-dihydro-2,3-dihydroxybenzoate dehydrogenase	entA	sp|P15047|ENTA_ECOLI 2,3-dihydro-2,3-dihydroxybenzoate dehydrogenase OS=Escherichia coli (strain K12) OX=83333 GN=entA PE=1 SV=1	7	7	0.00440006	0.487579	1.32216	0.000176394	0	2.1724	0.00180853	0.0065	1.73106	0.000399915	0.00153488	1.71037	0.289521	0.366598	1.07619	0.0218493	0.0338979	1.38822	52553020	44832010	48167000	64538000	65301000	62237020	84577960	79979030	83940990	50214020	56316010	50020010	67042980	76940960	58857010	31.9	26.249	0	12.387
P63386	P63386	Probable phospholipid import ATP-binding protein MlaF	mlaF	sp|P63386|MLAF_ECOLI Intermembrane phospholipid transport system ATP-binding protein MlaF OS=Escherichia coli (strain K12) OX=83333 GN=mlaF PE=1 SV=1	9	9	0.00490612	0.479048	1.12641	0.00401732	0.00467128	1.33803	0.00214755	0.00628721	1.48164	0.0713552	0.0615385	1.15602	0.248261	0.30844	1.17855	0.0108608	0.0206479	1.4724	72557020	76834020	75519970	82339000	85206020	85763980	77309050	91593020	91853980	87865990	109110000	71887970	93809990	124530000	115040100	48.3	29.096	0	45.031
P0A786	P0A786	Aspartate carbamoyltransferase catalytic chain	pyrB	sp|P0A786|PYRB_ECOLI Aspartate carbamoyltransferase catalytic subunit OS=Escherichia coli (strain K12) OX=83333 GN=pyrB PE=1 SV=2	21	21	0.00499695	0.468182	1.24703	0.415217	0.392035	0.955008	0.358566	0.337585	0.960731	0.0479645	0.0444053	0.863417	0.00070568	0.00514286	1.53592	0.000752646	0.00686154	1.43779	1203899000	1333200000	1340000000	1561999000	1664301000	1604401000	1201700000	1056600000	1090300000	2099299000	1947101000	1906500000	1893701000	1884600000	1791200000	73	34.427	0	323.31
P0AD12	P0AD12	Protein YeeZ	yeeZ	sp|P0AD12|YEEZ_ECOLI Protein YeeZ OS=Escherichia coli (strain K12) OX=83333 GN=yeeZ PE=1 SV=1	9	9	0.00571099	0.492522	1.12947	0.0403535	0.0320107	1.15008	0.00798089	0.0112896	1.20559	0.0494869	0.0453882	1.04879	0.08529	0.112544	1.19463	0.000207918	0.0044	1.29737	206879900	214400000	215800000	231619900	241530100	246530000	219380000	221259900	227490100	281790000	218280000	265310200	267210000	278780100	280590000	37.2	29.68	0	198.32
P0ADV5	P0ADV5	Uncharacterized protein YhbW	yhbW	sp|P0ADV5|YHBW_ECOLI Luciferase-like monooxygenase OS=Escherichia coli (strain K12) OX=83333 GN=yhbW PE=4 SV=1	7	7	0.00592665	0.486833	1.2019	0.000108974	0	1.95173	0.0645898	0.0543093	1.39904	2.84417e-07	0	2.39431	7.5958e-07	0	1.81951	0.00432861	0.0133861	1.33281	24482990	24827990	24637000	28389010	28894020	31699010	60201020	57714960	59161970	44630000	44166990	45764980	29793990	34824020	34174000	30.4	37.129	0	20.841
P0A9N4	P0A9N4	Pyruvate formate-lyase 1-activating enzyme	pflA	sp|P0A9N4|PFLA_ECOLI Pyruvate formate-lyase 1-activating enzyme OS=Escherichia coli (strain K12) OX=83333 GN=pflA PE=1 SV=2	9	9	0.00627268	0.48848	0.939006	0.060487	0.0434033	1.0788	0.601258	0.6826	0.976897	0.00317688	0.00546633	0.8096	0.793188	0.910176	0.944168	0.132654	0.154108	1.12294	123120000	124350000	127120000	117500100	115640000	118590000	96375010	99767940	107410000	149490000	78410040	139750000	140370000	126109900	155680000	45.5	28.204	0	19.991
P61320	P61320	Outer-membrane lipoprotein LolB	lolB	sp|P61320|LOLB_ECOLI Outer-membrane lipoprotein LolB OS=Escherichia coli (strain K12) OX=83333 GN=lolB PE=1 SV=1	12	12	0.00636774	0.473692	1.13656	2.90603e-05	0	1.5572	0.0140087	0.0159842	1.56942	0.00777306	0.0100578	1.19758	0.255888	0.316897	1.79443	0.0544774	0.0721589	1.30354	256229800	252700200	243089900	274429900	291170000	289200000	295580000	319640100	286140000	330369900	1073400000	256460000	276650200	387320200	325370000	70.5	23.55	0	132.58
P0A9M0	P0A9M0	Lon protease	lon	sp|P0A9M0|LON_ECOLI Lon protease OS=Escherichia coli (strain K12) OX=83333 GN=lon PE=1 SV=1	41	41	0.00641604	0.458963	1.11246	0.0094326	0.0101113	1.13878	0.0443095	0.0404836	1.1428	0.0284542	0.0283814	0.892928	0.494377	0.673094	0.820705	0.0130242	0.0232646	1.2459	479710000	497810000	508020300	542699800	546190100	563480300	439149900	466420000	421679900	529060400	240320000	527460300	612630100	568840300	673259600	53.1	87.437	0	249.62
P07024	P07024	Protein UshA;UDP-sugar hydrolase;5-nucleotidase	ushA	sp|P07024|USHA_ECOLI Protein UshA OS=Escherichia coli (strain K12) OX=83333 GN=ushA PE=1 SV=2	18	18	0.00707478	0.487571	1.13401	0.213516	0.157934	1.08879	0.00224895	0.00620619	1.43538	0.4773	0.526946	1.0498	0.694674	0.852547	1.05095	0.208141	0.232422	1.11165	195350100	208079900	202960000	234889900	222030000	230689900	195720000	238129900	204800000	199230100	266110000	180630100	196019900	241640000	239270000	47.3	60.823	0	122.68
P37648	P37648	Protein YhjJ	yhjJ	sp|P37648|YHJJ_ECOLI Protein YhjJ OS=Escherichia coli (strain K12) OX=83333 GN=yhjJ PE=1 SV=1	22	22	0.00733889	0.487724	1.12052	0.0332826	0.0273172	0.866677	0.000238091	0.000846715	1.27146	9.03884e-06	0	0.556107	0.000955692	0.00417857	0.539383	0.0232941	0.0353667	1.32373	262719900	271230100	259920100	286459800	305450100	297800100	144390100	145190000	151940000	147380000	157930100	124870000	300539800	385929900	370390000	57.8	55.527	0	182.78
P0AE22	P0AE22	Class B acid phosphatase	aphA	sp|P0AE22|APHA_ECOLI Class B acid phosphatase OS=Escherichia coli (strain K12) OX=83333 GN=aphA PE=1 SV=1	7	7	0.00796055	0.51	1.21165	0.00223512	0.00302128	0.569933	0.805869	0.870449	1.02679	0.00108758	0.00300752	0.665928	0.0368187	0.0505911	0.22456	0.186871	0.213059	0.914336	38628010	35141010	35137990	45715990	42210000	43969020	23617000	25938020	22994000	3217401	16354000	10265010	31334010	31990980	36372010	31.6	26.103	0	25.031
P37767	P37767	Uncharacterized HTH-type transcriptional regulator YfhH	yfhH	sp|P37767|YFHH_ECOLI Uncharacterized HTH-type transcriptional regulator YfhH OS=Escherichia coli (strain K12) OX=83333 GN=yfhH PE=4 SV=2	2	2	0.00826332	0.508903	1.72433	0.409554	0.383898	1.33841	0.0032357	0.00753917	2.14816	0.000253834	0.00192701	2.38982	0.239367	0.297605	1.90618	0.00787986	0.0171514	3.10734	1472700	1638801	1675700	2705901	3317101	2310101	3955598	3392502	4113398	2352999	7490259	1589326	7698441	3634601	4336540	11	30.707	0.0014684	2.6679
P63235	P63235	Probable glutamate/gamma-aminobutyrate antiporter	gadC	sp|P63235|GADC_ECOLI Glutamate/gamma-aminobutyrate antiporter OS=Escherichia coli (strain K12) OX=83333 GN=gadC PE=1 SV=1	8	8	0.00829705	0.504875	0.714962	9.05152e-06	0	19.955	0.000330323	0.00187805	21.4185	0.00212812	0.00425143	2.86088	3.81573e-05	0	0.0418865	0.00357569	0.0138764	4.83112	14845990	11960010	13353000	9234896	10115000	9276194	43279020	44063990	29111000	418680	611710	680320	49240000	51249020	105940000	15.5	55.076	0	299.49
P0ABB4	P0ABB4	ATP synthase subunit beta	atpD	sp|P0ABB4|ATPB_ECOLI ATP synthase subunit beta OS=Escherichia coli (strain K12) OX=83333 GN=atpD PE=1 SV=2	31	31	0.00850209	0.516	1.10245	0.0271036	0.024722	1.14097	0.0123044	0.0147015	1.11068	0.000490715	0.00141176	1.43531	0.00666393	0.0141477	1.36926	0.0100182	0.0205495	1.32196	2869602000	3064398000	2920401000	3226401000	3250698000	3280900000	4370705000	4346101000	3997598000	4401101000	3620998000	4136902000	3623800000	4367205000	3748799000	87.4	50.325	0	323.31
P22259	P22259	Phosphoenolpyruvate carboxykinase [ATP]	pckA	sp|P22259|PCKA_ECOLI Phosphoenolpyruvate carboxykinase (ATP) OS=Escherichia coli (strain K12) OX=83333 GN=pckA PE=1 SV=2	36	36	0.0085784	0.500824	1.10854	7.81093e-06	0	0.325731	2.23198e-06	0	0.302009	7.76937e-06	0	0.70978	0.00216242	0.00390588	0.618494	3.55044e-06	0	0.259376	2110000000	2132100000	2142801000	2284600000	2453801000	2342501000	1540099000	1484499000	1507700000	1504699000	1202600000	1260399000	523400100	541959900	593009700	69.1	59.643	0	323.31
P64483	P64483	Uncharacterized protein YeaK	yeaK	sp|P64483|YEAK_ECOLI Uncharacterized protein YeaK OS=Escherichia coli (strain K12) OX=83333 GN=yeaK PE=4 SV=1	5	5	0.00859351	0.486514	1.31408	0.00374401	0.00483871	1.62742	0.00413202	0.00755556	1.59786	0.00727388	0.00931365	1.47763	0.00933066	0.0169322	2.50383	0.0131928	0.0232177	1.61156	10396000	10585990	11345000	15286000	12879000	14391000	14785000	18402010	14805010	21246010	39561000	23316990	13971990	19789000	18900000	32.3	17.85	0	20.7
P38104	P38104	Starvation-sensing protein RspA	rspA	sp|P38104|RSPA_ECOLI Starvation-sensing protein RspA OS=Escherichia coli (strain K12) OX=83333 GN=rspA PE=2 SV=1	10	10	0.00896933	0.497667	0.712788	0.000176293	0	0.0653672	0.000890659	0.00382879	0.114864	0.00010852	0.00155556	0.05512	0.000644263	0.00525843	0.0129744	0.000175666	0.00248	0.310219	130120000	104320000	125350000	85185960	88105970	82099970	9388295	5499602	5518802	2055701	647590	2791500	41070990	34297020	36061980	29.7	45.968	0	22.107
P0AGD7	P0AGD7	Signal recognition particle protein	ffh	sp|P0AGD7|SRP54_ECOLI Signal recognition particle protein OS=Escherichia coli (strain K12) OX=83333 GN=ffh PE=1 SV=1	22	22	0.00971586	0.511892	1.12121	0.059209	0.042648	1.11539	0.261976	0.228586	1.11527	0.0317433	0.0308546	0.84644	0.124233	0.156995	0.851662	0.0452546	0.0641508	1.3308	272689900	267260200	290030100	309080100	310310000	310630200	214149900	248370100	241000000	254930000	201070000	254729800	309069900	374010200	430970000	59.6	49.787	0	298.68
P27829	P27829	UDP-N-acetyl-D-mannosamine dehydrogenase	wecC	sp|P27829|WECC_ECOLI UDP-N-acetyl-D-mannosamine dehydrogenase OS=Escherichia coli (strain K12) OX=83333 GN=wecC PE=1 SV=4	2	2	0.0101743	0.510947	0.556029	0.0027079	0.00391129	1.55944	0.54703	0.610872	0.894923	0.0716756	0.0615401	1.78939	0.52823	0.712947	1.30551	0.360306	0.413039	1.53759	1610200	1540000	1469901	667490	940481	998129	2470302	1947699	4340400	2156999	997230	3770402	1823599	1359801	5343261	6.2	45.838	0	7.3657
P0ABS5	P0ABS5	DNA primase	dnaG	sp|P0ABS5|DNAG_ECOLI DNA primase OS=Escherichia coli (strain K12) OX=83333 GN=dnaG PE=1 SV=1	10	10	0.0101987	0.497846	0.790331	0.0267819	0.024474	0.728268	0.0563835	0.0479179	0.828448	0.000339089	0.00171429	0.636002	0.724043	0.868201	1.07186	0.449519	0.523838	0.836133	24440010	22185010	21976000	18741000	18782000	16711000	14832010	13939000	14827010	26827010	17299000	31618020	15499000	15430000	29125010	18.9	65.564	0	15.725
P76223	P76223	Protein YnjB	ynjB	sp|P76223|YNJB_ECOLI Protein YnjB OS=Escherichia coli (strain K12) OX=83333 GN=ynjB PE=1 SV=2	6	6	0.0110996	0.5196	1.26253	0.00178616	0.00251781	1.61734	0.00570632	0.00861202	1.84956	0.400609	0.41811	1.08367	0.0357591	0.0490694	1.50056	0.0307975	0.0455687	1.44578	9056602	10549000	10496000	12314010	12641010	12964000	10576010	9760806	12361990	14239990	18903000	12587010	11904010	16690010	15252990	17.8	42.844	0	5.8273
P0AE08	P0AE08	Alkyl hydroperoxide reductase subunit C	ahpC	sp|P0AE08|AHPC_ECOLI Alkyl hydroperoxide reductase C OS=Escherichia coli (strain K12) OX=83333 GN=ahpC PE=1 SV=2	17	17	0.0123093	0.568195	0.886458	5.53831e-05	0	0.317535	6.97379e-05	0	0.35089	0.000962344	0.00314961	0.706897	0.00436235	0.0076996	1.29909	0.000149898	0.0026383	0.370483	10080990000	10151990000	10943000000	9250597000	9324687000	9044002000	7464397000	6925294000	7652897000	14507010000	13108010000	12912000000	4114702000	4102898000	3373400000	78.6	20.761	0	323.31
P76250	P76250	HTH-type transcriptional regulator DmlR	dmlR	sp|P76250|DMLR_ECOLI HTH-type transcriptional regulator DmlR OS=Escherichia coli (strain K12) OX=83333 GN=dmlR PE=1 SV=2	3	3	0.0126952	0.585238	0.717808	0.0860978	0.0605831	0.784557	0.263888	0.230643	0.887194	0.686867	0.78799	0.819108	0.813323	0.922089	1.04771	0.216045	0.240636	0.885734	4119667	3513000	4486101	2897500	3025099	2739500	5179668	5192709	1326591	3503701	3601001	5918098	3859300	3370498	3468301	9.1	34.63	0.00098474	2.7678
P75818	P75818	Uncharacterized lipoprotein YbjP	ybjP	sp|P75818|YBJP_ECOLI Uncharacterized lipoprotein YbjP OS=Escherichia coli (strain K12) OX=83333 GN=ybjP PE=1 SV=1	6	6	0.0128289	0.574419	1.2208	0.000989569	0.00201258	1.36976	0.0162874	0.017809	1.44935	0.00518533	0.00843064	1.41215	0.107103	0.138388	2.27532	0.017798	0.0290681	1.17078	1390001000	1524801000	1484001000	1905001000	1672499000	1796099000	1923801000	2309300000	1993700000	2364899000	7343899000	2133301000	1674201000	1820501000	1656100000	50.9	18.991	0	323.31
P75780	P75780	Catecholate siderophore receptor Fiu	fiu	sp|P75780|FIU_ECOLI Catecholate siderophore receptor Fiu OS=Escherichia coli (strain K12) OX=83333 GN=fiu PE=1 SV=1	19	19	0.0129385	0.561364	1.35459	0.000232953	0	1.85039	0.675956	0.763136	1.03787	0.00279786	0.00567876	1.46725	0.137411	0.169752	0.202465	0.0425829	0.0597179	1.3138	93401980	85592030	84357960	131449900	120690000	105660000	117260000	138540000	131130000	4185303	82307000	16247990	102229900	136580000	109530000	34.1	81.959	0	59.54
P0ADX1	P0ADX1	Protein YhfA	yhfA	sp|P0ADX1|YHFA_ECOLI Protein YhfA OS=Escherichia coli (strain K12) OX=83333 GN=yhfA PE=1 SV=1	5	5	0.0130619	0.548889	1.16251	0.159692	0.113592	0.836847	0.00973787	0.0127515	0.715719	0.0139111	0.0156793	0.791022	0.342426	0.450995	1.63487	0.313112	0.351783	0.654752	213259900	214919900	232500100	265680100	256050000	246100100	179380000	158219900	185840000	271489900	877729900	195410000	69367020	216349900	199309900	50	14.517	0	34.837
P67603	P67603	UPF0267 protein YqfB	yqfB	sp|P67603|AC4CH_ECOLI N(4)-acetylcytidine amidohydrolase OS=Escherichia coli (strain K12) OX=83333 GN=yqfB PE=1 SV=1	9	9	0.0131059	0.545565	1.15344	0.00829974	0.00868385	1.11033	0.0762227	0.0617214	1.31203	0.000425557	0.0015	1.15312	0.375887	0.510432	1.11462	0.191556	0.217492	1.11825	141730000	144440100	146890000	162929900	159760000	177280000	168000100	163700100	167650000	174650100	183759900	129749900	160380100	143340000	182909900	64.1	11.905	0	58.897
P75797	P75797	Glutathione-binding protein GsiB	gsiB	sp|P75797|GSIB_ECOLI Glutathione-binding protein GsiB OS=Escherichia coli (strain K12) OX=83333 GN=gsiB PE=1 SV=1	20	20	0.0131394	0.535574	1.1397	0.902	0.947732	1.00902	0.0971935	0.0767712	1.24589	0.0310654	0.0302786	0.831168	0.594892	0.778897	1.12437	0.0664649	0.0835604	1.27122	345009900	372010000	377250000	412319700	407840000	426249800	274640000	321760000	314619800	353609800	610210000	318960000	386819800	492870300	521719900	56.1	56.47	0	264.87
P0A855	P0A855	Protein TolB	tolB	sp|P0A855|TOLB_ECOLI Tol-Pal system protein TolB OS=Escherichia coli (strain K12) OX=83333 GN=tolB PE=1 SV=1	20	20	0.0150062	0.58775	1.13493	0.00063263	0.00249027	1.69753	0.00219858	0.00625455	1.75891	0.0126313	0.0144592	1.21725	0.127939	0.161862	1.57661	0.00409077	0.0132391	1.6997	1067299000	1156900000	1119800000	1316099000	1245700000	1232901000	1286001000	1324500000	1464100000	1347900000	2815599000	1427799000	1639899000	2211900000	1871800000	60.2	45.955	0	323.31
P0A910	P0A910	Outer membrane protein A	ompA	sp|P0A910|OMPA_ECOLI Outer membrane protein A OS=Escherichia coli (strain K12) OX=83333 GN=ompA PE=1 SV=1	23	23	0.0150264	0.575755	1.24214	5.47419e-05	0	1.82208	0.00162587	0.00561905	1.77774	0.000110405	0.00153846	1.6518	0.119974	0.151864	2.05808	0.0871229	0.103455	1.34838	13226000000	14376000000	14269990000	18806000000	16045980000	17232010000	23471010000	23520030000	22151010000	21521990000	59280030000	18539000000	16235990000	24362970000	16816010000	71.4	37.2	0	323.31
P31678	P31678	Trehalose-6-phosphate phosphatase	otsB	sp|P31678|OTSB_ECOLI Trehalose-6-phosphate phosphatase OS=Escherichia coli (strain K12) OX=83333 GN=otsB PE=1 SV=2	14	14	0.0151227	0.56424	1.11193	1.89818e-05	0	2.37314	0.000203982	0.000943089	2.40487	1.47911e-05	0	1.93177	2.77487e-05	0	1.84091	0.000616728	0.00614035	1.67378	87573050	94034990	94707980	103230000	100900000	102939900	178000100	175379900	180100000	173730100	165880000	168840000	140460000	160100000	162629900	62	29.175	0	173.63
P31133	P31133	Putrescine-binding periplasmic protein	potF	sp|P31133|POTF_ECOLI Putrescine-binding periplasmic protein PotF OS=Escherichia coli (strain K12) OX=83333 GN=potF PE=1 SV=3	12	12	0.0152816	0.555608	1.21688	0.213784	0.157976	1.10015	0.000763251	0.00383051	1.91124	7.40723e-05	0.00191781	0.653838	0.544935	0.730788	1.14341	0.0099452	0.0206893	1.67567	798919500	801749900	831579500	1068100000	909059800	988509800	541679800	541770000	507339700	829939700	1372499000	699030100	1150801000	1677901000	1297901000	49.2	40.839	0	323.31
P0A6K3	P0A6K3	Peptide deformylase	def	sp|P0A6K3|DEF_ECOLI Peptide deformylase OS=Escherichia coli (strain K12) OX=83333 GN=def PE=1 SV=2	8	8	0.0164756	0.579462	1.18648	0.192135	0.139549	1.1227	0.00140052	0.0059185	1.45941	0.00173871	0.00317757	1.58915	0.00287164	0.00411429	1.57603	0.190868	0.216779	1.07874	61067970	61122980	68430010	73836010	78438030	73663040	96536960	111280100	95421980	107800000	104150100	89059970	69043960	71729990	64743020	56.2	19.328	0	23.976
P16869	P16869	FhuE receptor	fhuE	sp|P16869|FHUE_ECOLI FhuE receptor OS=Escherichia coli (strain K12) OX=83333 GN=fhuE PE=1 SV=2	18	18	0.0166395	0.57283	1.45128	0.0200653	0.0195178	1.43116	0.077984	0.0641613	0.745192	0.173756	0.152255	1.15134	0.371207	0.503575	0.645192	0.244601	0.273789	1.15689	76967000	69437030	58269980	107340000	91250970	97184030	81915980	77399050	74963020	31242010	102270000	26176990	68809030	87231020	80335000	35.5	81.232	0	61.348
P0A9C5	P0A9C5	Glutamine synthetase	glnA	sp|P0A9C5|GLN1B_ECOLI Glutamine synthetase OS=Escherichia coli (strain K12) OX=83333 GN=glnA PE=1 SV=2	26	26	0.0168449	0.569333	1.13855	0.516987	0.551807	1.01546	0.177438	0.143809	1.0333	4.66721e-06	0	1.57213	0.00286692	0.00413397	3.56461	0.053201	0.0704321	0.925395	1152600000	1162301000	1173299000	1255199000	1404000000	1316400000	1784100000	1841500000	1859000000	3381298000	6121403000	3439601000	1017201000	1106400000	1106800000	71.6	51.903	0	323.31
P10443	P10443	DNA polymerase III subunit alpha	dnaE	sp|P10443|DPO3A_ECOLI DNA polymerase III subunit alpha OS=Escherichia coli (strain K12) OX=83333 GN=dnaE PE=1 SV=1	6	6	0.017992	0.580291	0.685331	0.104202	0.0727159	0.723169	0.0559848	0.0477135	0.687784	0.651009	0.751534	1.1171	0.132265	0.164275	0.86927	0.0762315	0.0914274	0.574177	4358099	4866300	4110299	3372602	2572482	3234101	7168999	3333900	5084403	3744902	4289498	3564401	2670200	1678201	3682300	6	129.9	0.0005005	3.1614
P0A6Y8	P0A6Y8	Chaperone protein DnaK	dnaK	sp|P0A6Y8|DNAK_ECOLI Chaperone protein DnaK OS=Escherichia coli (strain K12) OX=83333 GN=dnaK PE=1 SV=2	62	62	0.018105	0.572143	1.10659	4.21553e-05	0	1.75969	0.00111698	0.00363014	1.57582	0.000936779	0.00321285	1.30322	0.0626615	0.0850815	1.15816	0.00738789	0.0161028	1.25045	6855206000	7247006000	6958204000	8063591000	7521198000	7723600000	8770489000	9114992000	9570890000	7836992000	9054601000	7567598000	8157996000	9412304000	8802295000	81	69.114	0	323.31
P16681	P16681	Protein PhnB	phnB	sp|P16681|YJDN_ECOLI Protein YjdN OS=Escherichia coli (strain K12) OX=83333 GN=yjdN PE=4 SV=1	8	8	0.0181369	0.564561	1.31561	7.23443e-05	0	2.85976	5.64329e-06	0	2.52767	5.0982e-05	0.00259259	2.53151	0.0481517	0.0665592	2.35276	0.0019463	0.0111852	1.77415	171870000	157980000	163380100	203849900	200670000	246940000	382960200	445090300	422219900	300059800	706989600	272340100	252790000	326819800	299850100	68	16.171	0	198.65
P0ACF0	P0ACF0	DNA-binding protein HU-alpha	hupA	sp|P0ACF0|DBHA_ECOLI DNA-binding protein HU-alpha OS=Escherichia coli (strain K12) OX=83333 GN=hupA PE=1 SV=1	5	5	0.0187428	0.571724	1.53438	0.00385617	0.00477032	1.87864	0.00656619	0.0092872	1.97501	0.0277943	0.0274064	1.44702	0.184917	0.223861	1.67034	0.0529605	0.0704568	1.51386	813119600	911119700	784990300	1564899000	1115200000	1203801000	1163500000	1458000000	1038700000	967229600	2624401000	1067700000	945199700	1431799000	1490899000	57.8	9.5349	0	323.31
P25536	P25536	Maf-like protein YhdE	yhdE	sp|P25536|NTPPA_ECOLI dTTP/UTP pyrophosphatase OS=Escherichia coli (strain K12) OX=83333 GN=yhdE PE=1 SV=1	3	3	0.0188464	0.566508	1.22979	0.0178694	0.0169211	1.66458	0.00414995	0.00752459	1.79775	0.0025128	0.0057035	1.42921	0.00535831	0.0105755	1.83972	0.00321382	0.014038	1.42549	9775799	11129990	10169000	12004000	12538000	13673000	15893990	14175000	14336990	19831010	22244010	15617990	14330000	15983000	13992990	21.3	21.515	0	9.7709
P11454	P11454	Enterobactin synthase component F	entF	sp|P11454|ENTF_ECOLI Enterobactin synthase component F OS=Escherichia coli (strain K12) OX=83333 GN=entF PE=1 SV=3	23	23	0.0206942	0.620867	1.3971	7.4651e-05	0	2.00751	0.0027982	0.00731873	1.42258	0.0135815	0.0147393	1.48854	0.308478	0.40076	0.680085	0.088867	0.105365	1.18385	37053010	39387010	35230000	60431000	51366980	45167970	64067960	56139010	47148030	33128010	13137000	37160990	38668020	48720990	45280020	20.4	141.99	0	30.785
P0A840	P0A840	5/3-nucleotidase SurE	surE	sp|P0A840|SURE_ECOLI 5/3-nucleotidase SurE OS=Escherichia coli (strain K12) OX=83333 GN=surE PE=1 SV=1	6	6	0.0210638	0.619016	1.14575	0.0179037	0.017054	0.693176	0.0034109	0.00733632	0.801197	0.0200595	0.0217277	0.796194	0.20417	0.248923	1.18409	0.0307177	0.0455327	0.749781	29695990	28079010	31237020	32624010	34838020	34468980	21255000	25053990	24687010	43344020	30576000	32628020	18878990	24612000	23627990	34	26.9	0	33.512
P0C0K3	P0C0K3	Protein RdoA	rdoA	sp|P0C0K3|SRKA_ECOLI Stress response kinase A OS=Escherichia coli (strain K12) OX=83333 GN=srkA PE=1 SV=1	10	10	0.0216164	0.617742	1.22458	0.000147454	0	3.77917	0.00962396	0.0124888	1.77507	0.000600432	0.00203015	2.81866	1.08937e-05	0	6.58026	0.0184165	0.0301844	1.53851	5530503	5371997	6061103	6362902	7164802	7253698	15234010	19229010	13765990	40533990	33201980	38124010	7554105	10697000	8115398	36.9	38.12	0	41.064
P0AEJ6	P0AEJ6	Ethanolamine ammonia-lyase heavy chain	eutB	sp|P0AEJ6|EUTB_ECOLI Ethanolamine ammonia-lyase heavy chain OS=Escherichia coli (strain K12) OX=83333 GN=eutB PE=1 SV=1	11	11	0.0228907	0.653397	1.33559	0.00323664	0.00469565	1.48323	0.18997	0.15493	1.12914	0.755053	0.847741	1.03102	0.0340126	0.0469929	1.22967	0.0342635	0.0508643	1.27202	28527990	28935000	24376990	35475000	40622990	33266000	25506010	32376990	26705000	35668990	33218010	31577000	31724000	38068000	34292990	27.4	49.403	0	28.74
P22255	P22255	3(2),5-bisphosphate nucleotidase CysQ	cysQ	sp|P22255|CYSQ_ECOLI 3(2),5-bisphosphate nucleotidase CysQ OS=Escherichia coli (strain K12) OX=83333 GN=cysQ PE=1 SV=2	11	11	0.0233578	0.6525	1.09791	0.217551	0.161629	1.04106	0.349125	0.327009	1.07071	0.00307921	0.00553535	1.146	0.112931	0.145606	0.681681	0.0731295	0.0885774	1.20378	273690000	258250000	262140100	283189800	286830100	301879900	308510100	305280100	296090000	179480100	250639900	130470000	285390000	367440200	308210100	56.9	27.176	0	201.59
P0ADA5	P0ADA5	Uncharacterized lipoprotein YajG	yajG	sp|P0ADA5|YAJG_ECOLI Uncharacterized lipoprotein YajG OS=Escherichia coli (strain K12) OX=83333 GN=yajG PE=3 SV=1	7	7	0.023721	0.656554	1.18756	0.00730099	0.00766904	1.37984	0.003486	0.00727111	1.54605	0.0177891	0.0196658	1.21637	0.208053	0.252919	1.9228	0.105234	0.123764	1.22986	216100100	224310100	220020100	287020100	246780100	252179900	291250100	245560000	268370200	277289900	1011700000	270260100	234920000	327199800	258110000	56.2	20.95	0	323.31
P0AFH0	P0AFH0	Methylated-DNA--protein-cysteine methyltransferase	ogt	sp|P0AFH0|OGT_ECOLI Methylated-DNA--protein-cysteine methyltransferase OS=Escherichia coli (strain K12) OX=83333 GN=ogt PE=1 SV=1	2	2	0.0239931	0.653758	0.78851	0.262948	0.20628	0.902385	0.260829	0.227487	1.13079	0.0475204	0.0440284	0.766397	0.0519233	0.0701941	1.22304	0.330407	0.373194	1.08551	9488105	10411000	9104503	8014003	8054802	6830401	8754400	6635702	6969096	11062990	11132000	13360010	10105000	9617302	11836990	12.9	19.179	0	4.0221
P18843	P18843	NH(3)-dependent NAD(+) synthetase	nadE	sp|P18843|NADE_ECOLI NH(3)-dependent NAD(+) synthetase OS=Escherichia coli (strain K12) OX=83333 GN=nadE PE=1 SV=2	21	21	0.0240593	0.647701	1.13808	0.00145816	0.00272494	1.44441	0.000674101	0.00358182	1.48882	0.0739492	0.0628623	1.08368	0.000250636	0.00133333	1.56998	0.000321658	0.00480952	1.67446	500190200	470559900	520700100	581120300	573950000	541639700	532839600	527180100	555250300	811500000	752610200	776540500	780440300	874709900	842870600	89.5	30.636	0	323.31
Q46857	Q46857	2,5-diketo-D-gluconic acid reductase A	dkgA	sp|Q46857|DKGA_ECOLI 2,5-diketo-D-gluconic acid reductase A OS=Escherichia coli (strain K12) OX=83333 GN=dkgA PE=1 SV=3	20	20	0.0240717	0.639882	1.15369	2.74216e-05	0	2.1784	0.000549959	0.00338776	1.96259	4.2913e-05	0	1.7823	0.10322	0.13317	1.19848	0.00234383	0.0119829	1.67079	686859600	739289900	729699900	871950400	777990500	838749800	1277400000	1325900000	1238599000	770779900	1012800000	817079800	1110200000	1383200000	1125400000	76.4	31.109	0	323.31
P37595	P37595	Isoaspartyl peptidase;Isoaspartyl peptidase subunit alpha;Isoaspartyl peptidase subunit beta	iaaA	sp|P37595|IAAA_ECOLI Isoaspartyl peptidase OS=Escherichia coli (strain K12) OX=83333 GN=iaaA PE=1 SV=2	11	11	0.0242538	0.636058	1.1516	0.000240037	0	1.59147	0.00454407	0.00802376	1.41639	0.303669	0.292223	1.06007	0.151945	0.18831	1.54873	0.0512991	0.069136	1.28438	50370000	47121980	50924020	57668970	53603970	59715020	48094010	55020960	54413030	58438000	125230000	61353960	53308000	68669990	69958020	49.5	33.394	0	72.462
P75694	P75694	Uncharacterized protein YahO	yahO	sp|P75694|YAHO_ECOLI Uncharacterized protein YahO OS=Escherichia coli (strain K12) OX=83333 GN=yahO PE=3 SV=1	9	9	0.0246933	0.640743	0.758493	0.00343001	0.00486827	1.54278	0.102266	0.0811854	1.51875	0.00544985	0.00871837	1.44217	0.419634	0.580103	1.37985	0.0313401	0.0459026	1.58082	365120200	392270000	411669900	273220000	277019800	339939800	500630100	594439800	594280300	401400000	1091700000	353500000	471160000	738829700	669120100	64.8	9.8953	0	323.31
P37750	P37750	Putative lipopolysaccharide biosynthesis O-acetyl transferase WbbJ	wbbJ	sp|P37750|WBBJ_ECOLI Putative lipopolysaccharide biosynthesis O-acetyl transferase WbbJ OS=Escherichia coli (strain K12) OX=83333 GN=wbbJ PE=3 SV=2	2	2	0.0247725	0.633352	1.2417	0.617599	0.701013	0.690397	0.859657	0.911317	0.873364	0.24059	0.222143	0.584379	0.156088	0.192684	0.487243	0.800409	0.869618	0.79901	109350000	117620100	121140000	138719900	134370100	160030000	106260000	93713060	31225000	39622970	128220000	35475000	17667990	231840100	194029900	13.8	21.675	0	5.5731
P16456	P16456	Selenide, water dikinase	selD	sp|P16456|SELD_ECOLI Selenide, water dikinase OS=Escherichia coli (strain K12) OX=83333 GN=selD PE=1 SV=1	12	12	0.0252878	0.638167	0.872395	0.034078	0.0281599	0.882989	0.000146079	0.00116	0.521206	0.576501	0.665776	1.04904	0.708328	0.859229	1.04141	0.163499	0.186046	0.914601	1234600000	1380300000	1368300000	1159900000	1123999000	1187500000	1482401000	1502000000	1209000000	1643000000	1187599000	1349701000	1127800000	1232200000	1283701000	47.3	36.687	0	123.37
P0A9U6	P0A9U6	HTH-type transcriptional regulator PuuR	puuR	sp|P0A9U6|PUUR_ECOLI HTH-type transcriptional regulator PuuR OS=Escherichia coli (strain K12) OX=83333 GN=puuR PE=1 SV=1	3	3	0.0254319	0.634356	1.17069	0.889248	0.940437	1.03577	0.275017	0.245304	0.885206	0.000150754	0.00134615	2.61143	0.479493	0.657428	1.23821	0.0952481	0.113988	0.712703	9662405	10342000	9204496	12090000	10985010	11112000	24540000	23403000	28522000	11376000	19799990	7752000	5151702	8513497	7592000	19.5	20.091	0	18.707
P04036	P04036	4-hydroxy-tetrahydrodipicolinate reductase	dapB	sp|P04036|DAPB_ECOLI 4-hydroxy-tetrahydrodipicolinate reductase OS=Escherichia coli (strain K12) OX=83333 GN=dapB PE=1 SV=1	12	12	0.0254802	0.630216	1.09615	0.452887	0.445862	1.02817	0.13332	0.102532	0.892087	0.122613	0.104293	1.1503	0.656219	0.825456	1.12626	0.559671	0.659538	0.969726	191170000	202050000	206099900	213120100	220340100	223280100	246120000	200440100	245620000	172180000	368060100	179459900	189480100	210299900	182180100	58.6	28.756	0	108.7
P0ADT8	P0ADT8	Uncharacterized protein YgiM	ygiM	sp|P0ADT8|YGIM_ECOLI Uncharacterized protein YgiM OS=Escherichia coli (strain K12) OX=83333 GN=ygiM PE=3 SV=1	17	17	0.0256815	0.627413	1.09553	0.0165352	0.0164757	0.898836	0.00139633	0.00593711	1.75183	0.121624	0.103152	1.06049	0.485231	0.664574	1.19361	0.389397	0.448635	1.07266	345090200	371419800	371540100	397350200	390510100	403519800	388270300	371740100	393500000	366860200	680330000	324470000	339400000	422150200	410219900	62.1	23.076	0	323.31
P77774	P77774	Outer membrane protein assembly factor BamB	bamB	sp|P77774|BAMB_ECOLI Outer membrane protein assembly factor BamB OS=Escherichia coli (strain K12) OX=83333 GN=bamB PE=1 SV=1	19	19	0.025751	0.619158	1.15128	0.00083613	0.00214765	1.33122	0.0554541	0.0471935	1.3388	0.0376232	0.0355441	1.20999	0.236274	0.294877	1.6926	0.106578	0.124568	1.19991	525500300	547679700	553180400	634010300	580929800	659609600	587009700	665299700	722189900	669540400	1946100000	592500200	603459600	772620500	589930200	63	41.887	0	323.31
P33218	P33218	Inner membrane protein YebE	yebE	sp|P33218|YEBE_ECOLI Inner membrane protein YebE OS=Escherichia coli (strain K12) OX=83333 GN=yebE PE=1 SV=2	10	10	0.0257936	0.611117	1.20676	0.555725	0.617104	1.03787	0.155343	0.123241	1.26566	0.0173373	0.0193741	1.31067	6.78347e-05	0	19.6215	0.703509	0.802146	0.963507	49300000	58071020	52826990	66098980	60991000	65926960	68807030	76674000	64545000	860119700	1457400000	911419600	46075020	59660970	49212020	65.8	23.687	0	323.31
P0ADU2	P0ADU2	Probable quinol monooxygenase YgiN	ygiN	sp|P0ADU2|YGIN_ECOLI Probable quinol monooxygenase YgiN OS=Escherichia coli (strain K12) OX=83333 GN=ygiN PE=1 SV=1	6	6	0.0260997	0.612667	1.11596	0.0994566	0.0696207	0.845717	0.0254131	0.0255956	0.78638	0.127273	0.107452	0.850271	0.211238	0.257518	0.857666	0.104532	0.123447	0.924683	166989900	164500000	180130000	192160000	184640000	193820000	127600000	167800100	142059900	137040000	177620000	128250000	164990100	151590100	156420000	39.4	11.532	0	9.149
P0AC38	P0AC38	Aspartate ammonia-lyase	aspA	sp|P0AC38|ASPA_ECOLI Aspartate ammonia-lyase OS=Escherichia coli (strain K12) OX=83333 GN=aspA PE=1 SV=1	16	16	0.0265495	0.619291	1.0958	4.65529e-06	0	0.360303	1.18998e-06	0	0.062426	0.000645763	0.00195169	1.3015	3.92356e-05	0	0.0897238	1.49706e-06	0	0.0970022	556690200	577280100	560890000	649609600	606990000	601509800	761970200	700690000	744300400	56038980	39761980	58430980	57008030	49520990	58276990	37.9	52.356	0	228.58
P39265	P39265	D-allose-binding periplasmic protein	alsB	sp|P39265|ALSB_ECOLI D-allose-binding periplasmic protein OS=Escherichia coli (strain K12) OX=83333 GN=alsB PE=1 SV=1	11	11	0.0265869	0.6133	1.16591	1.61405e-05	0	0.42119	0.000647828	0.00311737	0.370124	0.00429521	0.00742731	0.663559	0.00470468	0.00897338	0.154666	0.00642606	0.0152438	0.580503	101000100	100970000	107130000	129910100	117130000	113790000	63596980	78205050	64179020	11821000	30629000	11164010	54493010	73341000	53475000	42.1	32.91	0	41.324
P0AE63	P0AE63	Cation transport regulator ChaB	chaB	sp|P0AE63|CHAB_ECOLI Putative cation transport regulator ChaB OS=Escherichia coli (strain K12) OX=83333 GN=chaB PE=3 SV=1	7	7	0.0266469	0.608148	1.17798	0.00162119	0.00264339	1.42107	0.00701432	0.00958655	1.94709	0.000401974	0.00152601	1.82762	0.0082665	0.0168652	2.54369	0.191099	0.217287	1.08519	176730100	162570000	150730000	188610100	197030100	190490000	280479900	310390000	303670000	374300000	595279700	319889900	173460000	171850000	185660000	64.5	8.9447	0	22.081
P76423	P76423	Hydroxyethylthiazole kinase	thiM	sp|P76423|THIM_ECOLI Hydroxyethylthiazole kinase OS=Escherichia coli (strain K12) OX=83333 GN=thiM PE=1 SV=1	5	5	0.0269856	0.60678	0.822108	0.267154	0.210852	0.952394	0.024311	0.0251767	0.725847	0.349159	0.349265	1.09368	0.466799	0.63995	1.10433	0.0699799	0.0863597	0.868999	47869000	44841970	42082010	34381010	36526020	39967000	56760980	47364000	43955020	62710040	43848970	44241980	41326010	40047980	35817000	34	27.339	0	152.14
P32176	P32176	Formate dehydrogenase-O major subunit	fdoG	sp|P32176|FDOG_ECOLI Formate dehydrogenase-O major subunit OS=Escherichia coli (strain K12) OX=83333 GN=fdoG PE=1 SV=5	26	26	0.0269872	0.59947	0.607435	0.000141246	0	2.70052	1.2217e-05	0	7.05977	0.362651	0.367153	1.11094	0.000593626	0.00557143	3.01469	0.000151779	0.00258333	0.238898	25162000	30408010	25947000	21437990	13944000	14885010	31917010	25485010	33464990	72931030	98659980	75594990	7464901	6495599	5582299	33.2	112.55	0	72.627
P0A7T7	P0A7T7	30S ribosomal protein S18	rpsR	sp|P0A7T7|RS18_ECOLI 30S ribosomal protein S18 OS=Escherichia coli (strain K12) OX=83333 GN=rpsR PE=1 SV=2	4	4	0.027104	0.59381	1.21931	0.00696056	0.00693605	1.71437	0.0148598	0.0173419	1.55359	0.288222	0.275345	1.10198	0.655571	0.825703	0.890649	0.0211851	0.0329502	1.66809	629209700	549299600	663229800	729310300	741650200	768239600	607369600	735840000	686360400	477089700	859369500	395010000	889259500	1316099000	909099500	48	8.9863	0	138.89
P68699	P68699	ATP synthase subunit c	atpE	sp|P68699|ATPL_ECOLI ATP synthase subunit c OS=Escherichia coli (strain K12) OX=83333 GN=atpE PE=1 SV=1	2	2	0.0272455	0.590918	0.819002	0.000631158	0.0025	0.624518	0.00102314	0.00352688	0.599031	0.00390913	0.00685194	0.759733	0.667951	0.832721	1.04659	0.181567	0.207135	0.659288	504009800	548260000	509079900	398140100	472200100	411059700	366919800	406160100	413929900	482119700	509700200	656259800	262070100	268610100	572659900	20.3	8.256	0.00051125	3.7945
P0AAJ5	P0AAJ5	Formate dehydrogenase-O iron-sulfur subunit	fdoH	sp|P0AAJ5|FDOH_ECOLI Formate dehydrogenase-O iron-sulfur subunit OS=Escherichia coli (strain K12) OX=83333 GN=fdoH PE=1 SV=1	8	8	0.0274315	0.591628	0.407914	0.66343	0.753061	1.17406	0.0162062	0.017899	4.11889	0.144105	0.123972	0.611202	0.0892658	0.117426	2.02054	0.00186775	0.0101991	0.152981	39170980	19249990	17589010	11121010	8591197	9422004	12824000	13432990	17579010	33241990	53111020	61967970	3457912	3955499	3471599	24.3	33.1	0	66.475
P06971	P06971	Ferrichrome-iron receptor	fhuA	sp|P06971|FHUA_ECOLI Ferrichrome outer membrane transporter/phage receptor OS=Escherichia coli (strain K12) OX=83333 GN=fhuA PE=1 SV=2	41	41	0.0275904	0.588368	1.16049	0.00111861	0.00226087	1.45109	0.0679052	0.0562983	1.16372	0.000665962	0.00190566	1.42969	0.285945	0.359358	1.65775	0.00297198	0.0144219	1.42363	1197999000	1248401000	1103600000	1414101000	1397201000	1305601000	1666899000	1683400000	1718900000	1343701000	4437395000	1261099000	1551599000	1772700000	1731399000	64.7	82.181	0	323.31
P31134	P31134	Putrescine transport ATP-binding protein PotG	potG	sp|P31134|POTG_ECOLI Putrescine transport ATP-binding protein PotG OS=Escherichia coli (strain K12) OX=83333 GN=potG PE=1 SV=2	7	7	0.0276733	0.583045	0.78428	0.000723445	0.00228571	0.548264	0.00290061	0.007179	0.659702	0.0017893	0.0035418	0.340937	0.11783	0.149316	0.593096	0.103815	0.12273	0.807886	24664990	19938000	22809000	17813010	16397000	18525990	9932102	6701303	6678696	19992010	8302899	14098000	16398990	17002000	21213000	27.1	41.93	0	9.057
P0A7T3	P0A7T3	30S ribosomal protein S16	rpsP	sp|P0A7T3|RS16_ECOLI 30S ribosomal protein S16 OS=Escherichia coli (strain K12) OX=83333 GN=rpsP PE=1 SV=1	7	7	0.0277127	0.57964	1.11221	0.00156622	0.00266332	1.27795	0.0136093	0.0157672	1.41423	0.0831815	0.0712648	1.06078	0.868375	0.944544	1.03285	0.0809918	0.0974638	1.17721	1598300000	1503900000	1466899000	1669601000	1654899000	1755699000	1624999000	1609600000	1609100000	1421300000	2235001000	1222999000	1610801000	2018799000	1768900000	58.5	9.1904	0	133.63
P09126	P09126	Uroporphyrinogen-III synthase	hemD	sp|P09126|HEM4_ECOLI Uroporphyrinogen-III synthase OS=Escherichia coli (strain K12) OX=83333 GN=hemD PE=3 SV=1	8	8	0.0280323	0.583689	0.903761	0.626986	0.713102	0.971468	0.534768	0.592707	1.10757	0.000720704	0.00181166	0.616965	0.486115	0.665303	1.21903	0.0232227	0.0354814	0.574852	55052030	51880010	56778990	47938990	49712990	50230020	35940990	34249990	30938020	69648030	41687020	101179900	26291000	27587990	42471970	33.7	27.798	0	42.103
P0ACP5	P0ACP5	HTH-type transcriptional regulator GntR	gntR	sp|P0ACP5|GNTR_ECOLI HTH-type transcriptional regulator GntR OS=Escherichia coli (strain K12) OX=83333 GN=gntR PE=1 SV=1	9	9	0.0288497	0.593143	1.07656	0.010241	0.0104051	1.22031	0.0134378	0.0157276	1.39337	0.00468879	0.00791489	1.32936	0.0283403	0.0418292	1.46811	0.0330351	0.0490787	1.21742	532569900	511579700	509240100	542210000	555510200	574739600	735550100	627110300	706610200	722850000	943919700	643429800	615290100	706100400	576220200	32	36.422	0	48.429
P31658	P31658	Molecular chaperone Hsp31 and glyoxalase 3	hchA	sp|P31658|HCHA_ECOLI Protein/nucleic acid deglycase 1 OS=Escherichia coli (strain K12) OX=83333 GN=hchA PE=1 SV=3	14	14	0.029035	0.595	1.11476	0.0134974	0.0138276	1.22992	9.3646e-05	0.00145	1.51563	1.10949e-05	0	2.03782	0.280948	0.351617	1.31486	0.00680212	0.0151277	1.46295	316770100	339540000	323920100	356360000	382969800	353640200	670770200	681700400	644770200	372160000	660010000	322429800	433890200	548999800	457940300	49.5	31.19	0	323.31
P0AC86	P0AC86	Glycogen phosphorylase	glgP	sp|P0AC86|PHSG_ECOLI Glycogen phosphorylase OS=Escherichia coli (strain K12) OX=83333 GN=glgP PE=3 SV=1	27	27	0.0291575	0.592817	0.964029	2.14719e-05	0	0.757541	0.00200621	0.00659726	0.75671	3.08204e-07	0	0.484897	0.0751806	0.102134	0.557749	0.000720323	0.00691473	0.745494	351760100	357750200	350610000	334849900	345320200	341860200	174159900	171030000	168880000	252530200	120929900	250680000	269429900	247909900	273679900	37.3	93.171	0	198.38
P06996;P77747;P77519;P76335	P06996	Outer membrane protein C	ompC	sp|P06996|OMPC_ECOLI Outer membrane porin C OS=Escherichia coli (strain K12) OX=83333 GN=ompC PE=1 SV=1	32	30	0.0293489	0.590426	1.14279	0.00802589	0.00864641	1.48105	0.169165	0.13662	1.10755	0.301745	0.289438	1.06438	0.140703	0.17244	1.66863	0.0553382	0.0728297	1.35545	14564010000	14239010000	13407020000	17088990000	15376980000	15791000000	14205020000	16421990000	14372000000	19237020000	40644040000	16520980000	17322000000	23774010000	16812980000	91	40.368	0	323.31
P60390	P60390	Ribosomal RNA small subunit methyltransferase H	rsmH	sp|P60390|RSMH_ECOLI Ribosomal RNA small subunit methyltransferase H OS=Escherichia coli (strain K12) OX=83333 GN=rsmH PE=1 SV=1	16	16	0.0294429	0.584211	1.23573	0.00018956	0	2.07505	0.00036642	0.00266667	2.22135	0.000212157	0.00216393	1.68189	0.00473921	0.00937358	2.81233	0.00160181	0.0099267	1.95687	59993960	66234040	61287000	85165020	70085030	76991020	99503040	108330000	107489900	169270000	243729900	131300000	117770100	143200000	108210000	51.8	34.877	0	129.52
P32177	P32177	Protein FdhD	fdhD	sp|P32177|FDHD_ECOLI Sulfur carrier protein FdhD OS=Escherichia coli (strain K12) OX=83333 GN=fdhD PE=1 SV=1	3	3	0.0296181	0.579417	0.149458	0.303005	0.250411	1.96936	0.849638	0.904743	1.19032	0.200883	0.180668	5.58597	0.213492	0.259685	2.35826	0.675339	0.778939	1.28632	5255969	21027990	3293099	1228063	1226708	806583	17656010	12868000	279220100	14791000	23342010	13826000	9179304	9871400	8548901	13.7	30.56	0	9.6759
P76002	P76002	Inhibitor of g-type lysozyme	pliG	sp|P76002|PLIG_ECOLI Inhibitor of g-type lysozyme OS=Escherichia coli (strain K12) OX=83333 GN=pliG PE=1 SV=1	8	8	0.0297667	0.574639	0.848553	0.061269	0.0437647	1.20615	0.274919	0.24538	0.870822	0.0127969	0.0146265	1.2919	0.237442	0.295546	0.816157	0.0654288	0.0824605	1.22346	427580100	424989900	368470000	341240200	340900200	351680100	532960100	490820000	551910000	336210000	417790000	259150200	489810000	558249700	448450000	64.7	14.906	0	110.57
P76503	P76503	3-ketoacyl-CoA thiolase	fadI	sp|P76503|FADI_ECOLI 3-ketoacyl-CoA thiolase FadI OS=Escherichia coli (strain K12) OX=83333 GN=fadI PE=1 SV=1	16	16	0.0305778	0.587673	1.08593	6.46832e-05	0	0.845562	0.00915915	0.0116937	1.27104	0.256297	0.237928	0.968569	0.4749	0.650733	0.961486	0.13762	0.157983	1.13203	148670100	150090000	147830000	154050000	163950000	167250000	139580000	142210100	151000000	143440100	131190000	155809900	156210100	159120100	192520000	46.8	46.53	0	90.201
P60720	P60720	Octanoyltransferase	lipB	sp|P60720|LIPB_ECOLI Octanoyltransferase OS=Escherichia coli (strain K12) OX=83333 GN=lipB PE=1 SV=1	4	4	0.030723	0.582909	1.24565	0.00663541	0.00679823	1.71097	0.0044086	0.007872	1.64312	0.000479197	0.00142703	1.962	0.000215727	0.00145455	2.25517	0.00513852	0.01296	1.74602	6290501	6111498	7469798	8068797	7979601	8620596	12978000	12573000	13292000	14958000	14565990	15117000	9997300	13103010	11669000	30.5	23.882	0	4.2878
P27828	P27828	UDP-N-acetylglucosamine 2-epimerase	wecB	sp|P27828|WECB_ECOLI UDP-N-acetylglucosamine 2-epimerase OS=Escherichia coli (strain K12) OX=83333 GN=wecB PE=1 SV=2	8	8	0.031525	0.596	1.09143	1.02747e-05	0	2.81008	0.000714601	0.0039476	2.10785	8.54155e-06	0	2.99141	0.000246755	0.00135593	1.91147	0.00380528	0.0138451	1.36229	64955980	65822970	64429980	74839030	69279040	69078020	184180000	191540100	209030100	122730000	114490100	136919900	82957990	97960980	85700050	25.5	42.244	0	7.517
P00579	P00579	RNA polymerase sigma factor RpoD	rpoD	sp|P00579|RPOD_ECOLI RNA polymerase sigma factor RpoD OS=Escherichia coli (strain K12) OX=83333 GN=rpoD PE=1 SV=2	23	22	0.0315665	0.590099	1.05535	0.00551804	0.0059532	1.23761	0.00596218	0.00894624	1.28388	0.152831	0.130293	0.953483	0.156057	0.193061	0.753499	3.42076e-05	0	1.47821	1388599000	1448600000	1454100000	1500299000	1532199000	1495600000	1323100000	1344401000	1425400000	1296200000	780920200	1236199000	2086799000	2089900000	2166301000	39.6	70.263	0	323.31
P0C0V0	P0C0V0	Periplasmic serine endoprotease DegP	degP	sp|P0C0V0|DEGP_ECOLI Periplasmic serine endoprotease DegP OS=Escherichia coli (strain K12) OX=83333 GN=degP PE=1 SV=1	27	27	0.0318192	0.588196	1.12465	0.0978848	0.0689778	1.06673	0.000208132	0.000935484	1.44991	0.168297	0.146522	1.07845	0.000148022	0.00166667	4.5414	0.17083	0.194434	1.09282	681579600	688090300	649669700	759070500	798180500	715360400	697670100	695019600	788150500	2855799000	3762300000	2656099000	693450100	812589800	705689700	57.2	49.354	0	323.31
P08331	P08331	2,3-cyclic-nucleotide 2-phosphodiesterase/3-nucleotidase	cpdB	sp|P08331|CPDB_ECOLI 2,3-cyclic-nucleotide 2-phosphodiesterase/3-nucleotidase OS=Escherichia coli (strain K12) OX=83333 GN=cpdB PE=1 SV=2	31	31	0.0318465	0.583612	1.11535	3.12099e-06	0	0.267928	4.68822e-05	0	0.209601	0.00200252	0.00401176	0.69341	4.32824e-05	0	0.216441	1.2335e-05	0	0.223197	318249800	331359800	319360000	381799900	343169800	356649900	208750000	218370100	246320100	67099990	81364010	62548000	64744040	74236050	77911040	52.2	70.831	0	246.99
P28305	P28305	Aminodeoxychorismate lyase	pabC	sp|P28305|PABC_ECOLI Aminodeoxychorismate lyase OS=Escherichia coli (strain K12) OX=83333 GN=pabC PE=1 SV=1	8	8	0.0318548	0.578	1.44421	0.269667	0.213591	1.1296	0.781686	0.851234	0.874404	0.271174	0.254606	1.2882	0.77416	0.897743	0.798356	0.282095	0.316131	1.28807	1216100000	1372599000	1212499000	2105801000	1484599000	1950100000	1104900000	1964300000	1993500000	1994301000	2209900000	233680000	2157700000	1810499000	1107201000	31.6	29.715	0	16.439
P0AF28	P0AF28	Nitrate/nitrite response regulator protein NarL	narL	sp|P0AF28|NARL_ECOLI Nitrate/nitrite response regulator protein NarL OS=Escherichia coli (strain K12) OX=83333 GN=narL PE=1 SV=1	10	10	0.0320185	0.576952	0.878751	0.214373	0.158422	1.11101	0.0922551	0.0730571	1.21558	0.00838901	0.0103735	1.21525	0.0166499	0.0288756	1.30351	0.0197767	0.0311248	1.2101	274980100	305140100	304310200	252790000	254149900	269690100	350529900	350180100	373329900	400710200	342550100	412010200	353640200	381509800	335359800	53.7	23.927	0	37.287
P0ABU5	P0ABU5	Enhancing lycopene biosynthesis protein 2	elbB	sp|P0ABU5|ELBB_ECOLI Glyoxalase ElbB OS=Escherichia coli (strain K12) OX=83333 GN=elbB PE=1 SV=1	7	7	0.0320343	0.57283	1.03291	0.00680457	0.00688563	0.861854	0.311437	0.282734	0.928704	0.00204936	0.00431304	1.14873	0.574316	0.760741	1.07401	0.00747757	0.0159796	0.819851	235349900	227739900	233230000	239949800	238749900	240470000	271090000	271150200	257790100	228640100	313889900	215790000	182770000	205489900	183419900	52.5	22.981	0	208.73
P0A754	P0A754	Glutathione-regulated potassium-efflux system ancillary protein KefF	kefF	sp|P0A754|KEFF_ECOLI Glutathione-regulated potassium-efflux system ancillary protein KefF OS=Escherichia coli (strain K12) OX=83333 GN=kefF PE=1 SV=1	3	3	0.0325238	0.578206	1.15091	0.0119788	0.012322	1.59457	0.000302338	0.00149677	1.76946	0.0144972	0.0168947	1.49634	0.474057	0.649092	0.883434	0.0299127	0.0445074	1.23098	11737000	13236010	12899000	15104990	13898010	14552000	19900000	21334990	15813000	13168010	8210605	12779000	17122010	15155000	14404990	22.7	20.17	0	4.7344
P0A8X0	P0A8X0	UPF0307 protein YjgA	yjgA	sp|P0A8X0|YJGA_ECOLI UPF0307 protein YjgA OS=Escherichia coli (strain K12) OX=83333 GN=yjgA PE=1 SV=1	10	10	0.032549	0.573556	1.23133	2.93224e-06	0	1.57012	0.00199895	0.00663361	2.06518	8.91778e-06	0	1.41205	0.155507	0.192027	1.45368	0.00176255	0.00993171	1.80515	376689900	362700200	364340000	509549900	409449900	445419900	518850200	518170100	521280000	451430100	817660100	414269900	596949800	774340500	633439700	45.9	21.359	0	323.31
P0A707	P0A707	Translation initiation factor IF-3;Translation initiation factor IF-3, N-terminally processed;Translation initiation factor IF-3S	infC	sp|P0A707|IF3_ECOLI Translation initiation factor IF-3 OS=Escherichia coli (strain K12) OX=83333 GN=infC PE=1 SV=1	11	11	0.032668	0.570789	1.11824	0.00226537	0.00355839	1.61066	0.000557439	0.00337056	1.71022	0.00583781	0.00847619	1.28577	0.00768599	0.0165751	1.5508	0.00278327	0.0149474	1.32159	621599700	661090200	616600300	674430200	709420200	740519600	761260400	877810000	805990400	991230600	1132199000	842059700	784669600	889849900	837650500	57.2	20.564	0	323.31
P46122	P46122	Uncharacterized lipoprotein YajI	yajI	sp|P46122|YAJI_ECOLI Uncharacterized lipoprotein YajI OS=Escherichia coli (strain K12) OX=83333 GN=yajI PE=1 SV=3	5	5	0.033081	0.571018	1.24639	0.00114085	0.00222222	1.68216	0.00108364	0.00340484	2.78183	0.547517	0.629818	1.07638	0.172823	0.211612	1.61347	0.0231696	0.0355967	1.6104	19555990	23599990	21387010	29088990	25391010	25875990	19046990	26287000	24585000	24139980	60553040	28363010	30314010	44039010	30879010	38.5	19.56	0	65.871
P0A8D6	P0A8D6	O-acetyl-ADP-ribose deacetylase	ymdB	sp|P0A8D6|YMDB_ECOLI O-acetyl-ADP-ribose deacetylase OS=Escherichia coli (strain K12) OX=83333 GN=ymdB PE=1 SV=1	9	9	0.0332635	0.570559	1.18775	0.000952204	0.00206452	1.44186	0.0500881	0.0441514	1.23891	0.00364824	0.00648113	1.61072	0.0260875	0.0408968	1.29403	0.00178436	0.0098835	1.38572	744289500	714130000	760649700	970670500	823619600	847380000	1065600000	1376899000	1151501000	1003101000	1052200000	830039600	969830300	1001401000	1107700000	79.7	18.88	0	94.286
P46888	P46888	Universal stress protein C	uspC	sp|P46888|USPC_ECOLI Universal stress protein C OS=Escherichia coli (strain K12) OX=83333 GN=uspC PE=2 SV=1	4	4	0.0335206	0.570964	1.11358	0.837954	0.905027	1.01256	0.779948	0.850027	1.02107	0.124116	0.104956	0.796885	0.303228	0.390129	1.28417	0.437692	0.509998	1.09102	28752980	28799020	27359020	33405000	30749990	30456010	23615000	26814000	18104990	31278010	55135000	27820020	25546000	32139990	35834000	43.7	15.633	0	12.971
P32099	P32099	Lipoate-protein ligase A	lplA	sp|P32099|LPLA_ECOLI Lipoate-protein ligase A OS=Escherichia coli (strain K12) OX=83333 GN=lplA PE=1 SV=3	5	5	0.0336479	0.565912	0.840401	0.00187257	0.0024594	0.776704	0.00673004	0.00916041	0.872474	0.269644	0.253305	0.973578	0.680193	0.842984	1.07591	0.00141745	0.00944	0.785538	27272990	27669000	28454010	24782010	24488010	21001010	26511000	27976990	26714990	34816010	21529990	35676020	22079000	20701010	22772000	17.8	37.925	0	14.835
P0ABF4	P0ABF4	Ethanolamine utilization protein EutM	eutM	sp|P0ABF4|EUTM_ECOLI Ethanolamine utilization protein EutM OS=Escherichia coli (strain K12) OX=83333 GN=eutM PE=1 SV=1	5	5	0.0340918	0.57207	0.631053	0.00276178	0.00417671	0.323528	0.00691242	0.00963514	0.325877	0.000629222	0.00199015	0.24193	0.0847654	0.112688	0.320005	0.0188397	0.0304518	0.467884	75624980	47570970	50911970	36037010	36801000	34707000	13526000	14332990	13378000	9439497	46122010	13786010	29882980	20227990	31036010	49.5	9.8654	0	64.898
P75736	P75736	Esterase YbfF	ybfF	sp|P75736|YBFF_ECOLI Esterase YbfF OS=Escherichia coli (strain K12) OX=83333 GN=ybfF PE=1 SV=1	11	11	0.0346298	0.585183	1.20973	0.00491831	0.00538042	1.49844	0.113906	0.0894353	1.17451	0.000593136	0.0020404	1.52026	0.0380953	0.0520676	1.79128	0.0189206	0.0306434	1.30681	44181010	45743020	50587030	57970000	51851970	60214000	72593950	69526050	71170970	79844020	118260000	62231020	54490990	64696040	64718970	73.6	28.437	0	24.876
P50456	P50456	Protein mlc	mlc	sp|P50456|MLC_ECOLI Protein mlc OS=Escherichia coli (strain K12) OX=83333 GN=mlc PE=1 SV=2	11	11	0.0348258	0.581138	1.13924	0.871346	0.929102	0.991448	0.779726	0.850444	0.975811	0.429122	0.457902	1.04328	0.920434	0.966675	1.00876	0.665983	0.770585	1.0332	52632980	56288990	58816020	60462960	64688000	65873030	58859970	61650990	54528030	61860980	48531020	59580960	51938000	64443020	57419970	36.5	44.316	0	13.014
P36548	P36548	N-acetylmuramoyl-L-alanine amidase AmiA	amiA	sp|P36548|AMIA_ECOLI N-acetylmuramoyl-L-alanine amidase AmiA OS=Escherichia coli (strain K12) OX=83333 GN=amiA PE=1 SV=1	6	6	0.0367218	0.61453	1.2291	0.944002	0.970953	0.990851	0.823297	0.88778	1.06373	0.0336812	0.0320443	1.3672	0.000220693	0.00140351	4.05429	0.607582	0.716671	1.06245	10107010	10222000	12001000	12470000	13035000	14162990	14780000	16856990	12718000	38706020	52578030	40600980	9568196	11802010	13168010	24.6	31.412	0	8.94
P0A6D7	P0A6D7	Shikimate kinase 1	aroK	sp|P0A6D7|AROK_ECOLI Shikimate kinase 1 OS=Escherichia coli (strain K12) OX=83333 GN=aroK PE=1 SV=2	10	10	0.0369962	0.61	1.07716	0.00276984	0.0041517	1.15986	0.475147	0.507247	1.06951	0.610001	0.70912	0.948954	0.607596	0.79153	1.119	0.197533	0.221809	1.06382	135880000	129410000	126560100	138810000	139119900	144029900	127900000	142780000	104140000	117240000	218239900	121870000	138150000	147720000	131290000	64.7	19.538	0	115.29
P22523	P22523	Chromosome partition protein MukB	mukB	sp|P22523|MUKB_ECOLI Chromosome partition protein MukB OS=Escherichia coli (strain K12) OX=83333 GN=mukB PE=1 SV=2	66	66	0.0371024	0.607529	0.902517	4.53189e-05	0	0.613321	0.0155544	0.0179923	0.894622	5.6643e-05	0.00225806	0.570786	0.399774	0.549503	0.773292	0.000296026	0.00505	0.642713	526610200	554170000	565360000	492139700	518979800	474880300	318329800	322200200	299140100	540829700	246289900	572769700	360870200	331529900	366130000	49.2	170.23	0	265.48
P27550	P27550	Acetyl-coenzyme A synthetase	acs	sp|P27550|ACSA_ECOLI Acetyl-coenzyme A synthetase OS=Escherichia coli (strain K12) OX=83333 GN=acs PE=1 SV=2	43	43	0.0372075	0.6044	0.820821	0.11002	0.0769082	0.867219	0.00596159	0.0089623	0.687137	0.0533195	0.0488639	1.22294	0.335035	0.440067	1.30658	0.00290798	0.0147092	0.561522	11660990000	13611010000	14441980000	10722000000	10749990000	10998000000	17390980000	15466980000	15586000000	20834000000	10780990000	22763000000	7543405000	6596095000	8156400000	76.1	72.093	0	323.31
P67080	P67080	UPF0001 protein YggS	yggS	sp|P67080|PLPHP_ECOLI Pyridoxal phosphate homeostasis protein OS=Escherichia coli (strain K12) OX=83333 GN=yggS PE=1 SV=1	6	6	0.0375841	0.610149	1.15612	0.00815344	0.00856361	1.52593	0.039988	0.036766	1.30498	0.902926	0.949309	0.993747	0.995156	0.995974	1.00077	0.0192821	0.0303253	1.24063	64409030	57958960	67158030	74851010	70438020	73480950	61554970	65246980	61258970	63859000	75880960	51856970	77904030	83467020	73623020	31.2	25.787	0	24.498
P45523	P45523	FKBP-type peptidyl-prolyl cis-trans isomerase FkpA	fkpA	sp|P45523|FKBA_ECOLI FKBP-type peptidyl-prolyl cis-trans isomerase FkpA OS=Escherichia coli (strain K12) OX=83333 GN=fkpA PE=1 SV=1	19	19	0.037622	0.607311	1.1673	0.00160513	0.00265	1.31065	0.00580014	0.00859636	1.91264	0.154472	0.131768	0.901919	0.446518	0.612549	1.23961	0.0858951	0.101555	1.36233	280699900	274370000	253180000	336379800	293179800	314480100	228319900	267969900	233820000	266250100	552630000	252430000	294080100	465200000	360370000	63	28.882	0	233.85
P64545	P64545	Uncharacterized protein YfgG	yfgG	sp|P64545|YFGG_ECOLI Protein YfgG OS=Escherichia coli (strain K12) OX=83333 GN=yfgG PE=1 SV=1	2	2	0.038183	0.608846	1.43505	0.00366484	0.00487365	2.22095	0.00249068	0.00701508	2.6595	0.389626	0.403315	1.10757	0.0513725	0.0695876	2.3045	0.0901349	0.106802	1.63381	12446010	14942010	12537000	23345990	17370000	16990990	14447010	17220010	12733010	21959010	55348980	23477000	18629000	32952020	16564010	25.4	7.4615	0	12.537
P0AAG0	P0AAG0	Dipeptide transport ATP-binding protein DppD	dppD	sp|P0AAG0|DPPD_ECOLI Dipeptide transport ATP-binding protein DppD OS=Escherichia coli (strain K12) OX=83333 GN=dppD PE=1 SV=1	10	10	0.0391016	0.615065	0.868261	0.000182343	0	0.530135	0.00375049	0.00727505	0.565142	0.00794494	0.0102	0.77936	0.0128224	0.0238872	0.490244	0.229295	0.255242	0.851664	156720000	168940000	178950100	138859900	152200000	146740000	139820100	126019900	127290000	95668040	59573010	97951010	147530000	117340000	169070100	31.8	35.844	0	49.275
P76176	P76176	Uncharacterized serine protease YdgD	ydgD	sp|P76176|YDGD_ECOLI Uncharacterized serine protease YdgD OS=Escherichia coli (strain K12) OX=83333 GN=ydgD PE=3 SV=1	4	4	0.0395028	0.620608	1.26013	0.352665	0.307339	0.810028	0.387151	0.378711	1.14976	0.0738827	0.0629185	1.22536	0.0536407	0.071577	1.82768	0.761734	0.842082	0.91697	119160000	134860000	154150100	175990100	171020100	164690000	153170100	174400000	170620100	186970000	372999900	216859900	74464980	153440100	167160000	15.4	29.277	0	7.935
P0AE88	P0AE88	Transcriptional regulatory protein CpxR	cpxR	sp|P0AE88|CPXR_ECOLI Transcriptional regulatory protein CpxR OS=Escherichia coli (strain K12) OX=83333 GN=cpxR PE=1 SV=1	13	13	0.0397338	0.616603	1.12713	0.000271628	0	1.81012	0.0197045	0.0206228	1.44699	0.0194738	0.0213826	1.22013	0.00378289	0.00695868	1.54306	0.0195936	0.0309416	1.1595	803699500	709369600	765119700	862759600	828070000	874300600	866550300	924569400	988970000	1195000000	1287200000	1041900000	853559600	893270500	891849700	53.9	26.312	0	323.31
P27431	P27431	50S ribosomal protein L16 arginine hydroxylase	roxA	sp|P27431|ROXA_ECOLI 50S ribosomal protein L16 3-hydroxylase OS=Escherichia coli (strain K12) OX=83333 GN=roxA PE=1 SV=2	11	11	0.040578	0.625795	1.2138	0.00132518	0.00284946	1.70078	0.000145096	0.00118367	2.1054	0.00349364	0.00613462	1.31045	0.0274938	0.0418651	1.28785	0.0085715	0.0192745	1.60618	69522000	77549000	78048980	89569950	83702950	100370000	93956950	101179900	99610980	105690000	99813980	85199030	102470000	140429900	121170000	38.3	42.578	0	154.37
P39180	P39180	Antigen 43;Antigen 43 alpha chain;Antigen 43 beta chain	flu	sp|P39180|AG43_ECOLI Antigen 43 OS=Escherichia coli (strain K12) OX=83333 GN=flu PE=1 SV=3	39	39	0.0406615	0.625031	1.27497	2.51762e-05	0	0.358037	0.207756	0.173997	0.85977	0.0052566	0.00839588	1.27761	0.41756	0.578009	0.724701	0.338318	0.383889	0.885685	1737599000	1724901000	1762700000	2612199000	2046700000	2047999000	2188099000	2082500000	2417901000	936139800	2567401000	836630100	1324000000	1916700000	1446400000	62.9	106.82	0	323.31
P05825	P05825	Ferrienterobactin receptor	fepA	sp|P05825|FEPA_ECOLI Ferrienterobactin receptor OS=Escherichia coli (strain K12) OX=83333 GN=fepA PE=1 SV=2	25	25	0.0407278	0.621271	1.31008	0.239333	0.180883	1.11612	0.0536483	0.0462785	1.29512	0.0279272	0.0275535	0.776386	0.415695	0.576933	1.45621	0.157067	0.179034	1.22939	151730000	133540000	118120000	195429900	164850100	167040000	107970100	101030000	102680100	128980000	440500100	130080000	155240000	197710100	144889900	49.6	82.106	0	186.31
P18956	P18956	Gamma-glutamyltranspeptidase;Gamma-glutamyltranspeptidase large chain;Gamma-glutamyltranspeptidase small chain	ggt	sp|P18956|GGT_ECOLI Glutathione hydrolase proenzyme OS=Escherichia coli (strain K12) OX=83333 GN=ggt PE=1 SV=1	24	24	0.040965	0.617569	1.11983	0.00304007	0.00454264	1.47205	0.00254428	0.00694527	1.64865	0.0785596	0.0669841	0.931505	0.210397	0.256606	1.28996	0.053154	0.0705154	1.26825	222629900	238890100	223590000	270300100	243409900	253810100	207379900	221090000	209630100	266140000	409720100	234080100	255250000	339859800	279630100	47.6	61.767	0	233.1
P09169	P09169	Protease 7	ompT	sp|P09169|OMPT_ECOLI Protease 7 OS=Escherichia coli (strain K12) OX=83333 GN=ompT PE=1 SV=1	24	24	0.0415036	0.623115	1.10231	0.0124757	0.0130352	1.11487	0.046787	0.0425309	1.20618	6.16012e-06	0	1.46754	0.48224	0.659928	1.14975	0.848121	0.90753	1.02131	4057098000	4178402000	4168002000	4798102000	4303800000	4582897000	6090099000	6135193000	5976802000	4341300000	6726395000	3677600000	3676700000	5161395000	3966401000	76.7	35.562	0	323.31
P0AEH1	P0AEH1	Regulator of sigma-E protease RseP	rseP	sp|P0AEH1|RSEP_ECOLI Regulator of sigma-E protease RseP OS=Escherichia coli (strain K12) OX=83333 GN=rseP PE=1 SV=1	6	6	0.0416779	0.622667	0.807478	0.0299927	0.0260364	0.614381	0.031101	0.0296017	0.753293	0.0379304	0.0357639	0.705986	0.638022	0.814932	0.929634	0.219627	0.244647	0.87397	11724000	11858000	14356000	10799010	9892198	9836395	9433496	7403796	10055000	13720010	9092799	12853010	10224000	10396000	12535000	17.1	49.071	0	7.3741
P16384	P16384	tRNA dimethylallyltransferase	miaA	sp|P16384|MIAA_ECOLI tRNA dimethylallyltransferase OS=Escherichia coli (strain K12) OX=83333 GN=miaA PE=1 SV=2	15	15	0.0422763	0.627429	0.625785	0.0827113	0.0584916	1.78786	0.0268412	0.0262882	1.84928	0.00934774	0.0112432	1.95577	0.000719609	0.00492632	11.9907	0.343437	0.391206	1.37776	10470000	12135000	7821798	5557498	5833797	7511699	21938000	17820990	19015990	88588010	188550000	102570000	8050203	18877000	17103000	67.4	35.065	0	60.305
P62623	P62623	4-hydroxy-3-methylbut-2-enyl diphosphate reductase	ispH	sp|P62623|ISPH_ECOLI 4-hydroxy-3-methylbut-2-enyl diphosphate reductase OS=Escherichia coli (strain K12) OX=83333 GN=ispH PE=1 SV=1	9	9	0.0434057	0.637672	0.818197	0.00132786	0.00284182	0.587422	0.0248254	0.0255501	0.7504	0.00100939	0.00307692	0.601433	0.204883	0.249944	0.759922	0.0509767	0.0691669	0.806248	163570100	159770000	191390000	147860000	129770000	142780000	105080000	104130000	99445050	122089900	99962020	179849900	138150000	125510000	151180000	20.3	34.774	0	9.8528
P0A9Q7	P0A9Q7	Aldehyde-alcohol dehydrogenase;Alcohol dehydrogenase;Acetaldehyde dehydrogenase [acetylating];Pyruvate-formate-lyase deactivase	adhE	sp|P0A9Q7|ADHE_ECOLI Aldehyde-alcohol dehydrogenase OS=Escherichia coli (strain K12) OX=83333 GN=adhE PE=1 SV=2	55	55	0.0435007	0.634074	1.14822	0.0461709	0.0358784	1.16332	0.250946	0.216737	1.07852	0.00712156	0.00941791	1.2852	0.0839818	0.111442	0.654519	0.00747901	0.0159389	1.2639	4441198000	4828596000	5193800000	5647593000	5378506000	5550800000	6201607000	5964298000	6392201000	3658300000	2202300000	3876301000	5941899000	6190204000	6113897000	63.7	96.126	0	323.31
P0ADL3	P0ADL3	Uncharacterized protein YicN	yicN	sp|P0ADL3|YICN_ECOLI Uncharacterized protein YicN OS=Escherichia coli (strain K12) OX=83333 GN=yicN PE=4 SV=2	1	1	0.0436348	0.630588	1.36767	0.0631403	0.0457875	1.44158	0.0751204	0.0609421	1.37403	0.00333538	0.00622439	2.02896	0.00185348	0.003	2.11198	0.0165336	0.0277941	1.57647	5672400	6744704	4967299	8177002	6975899	8523103	10444000	11430990	13296010	12348990	13134000	11038000	7863001	10003000	9466504	7.3	17.219	0.0078631	1.837
P0AEK2	P0AEK2	3-oxoacyl-[acyl-carrier-protein] reductase FabG	fabG	sp|P0AEK2|FABG_ECOLI 3-oxoacyl-[acyl-carrier-protein] reductase FabG OS=Escherichia coli (strain K12) OX=83333 GN=fabG PE=1 SV=1	11	11	0.0437576	0.625985	1.09116	0.0420467	0.0331646	1.1179	0.0342394	0.0323521	1.13514	0.00956279	0.0117267	1.15979	0.495561	0.674441	1.05305	0.0132935	0.023171	1.19724	870259700	808850100	811079600	930710000	875030300	910780000	989960300	923739800	973980600	865009600	981780200	785050400	932409600	1052600000	998279700	66.4	25.56	0	323.31
P64463	P64463	Putative selenoprotein YdfZ	ydfZ	sp|P64463|YDFZ_ECOLI Putative selenoprotein YdfZ OS=Escherichia coli (strain K12) OX=83333 GN=ydfZ PE=1 SV=1	2	2	0.0437925	0.621449	1.41857	0.0151376	0.0152584	1.80967	0.0694281	0.0572548	1.58626	0.0306865	0.0299886	1.47743	0.927512	0.970008	1.02443	0.0325563	0.04817	1.65934	11571000	12971990	17179010	20135990	19776000	18485010	19442000	20770010	20593000	11188990	21801990	11364000	18457000	25779010	24760000	38.8	7.2763	0	11.74
P0A7N9	P0A7N9	50S ribosomal protein L33	rpmG	sp|P0A7N9|RL33_ECOLI 50S ribosomal protein L33 OS=Escherichia coli (strain K12) OX=83333 GN=rpmG PE=1 SV=2	3	3	0.0438576	0.61859	1.38963	0.00658528	0.00681832	1.86005	0.0212468	0.0225902	1.83487	0.00587879	0.00844269	1.78511	0.449376	0.615494	1.15369	0.112145	0.129936	1.6095	1271400000	1672099000	1596401000	2427199000	1936399000	1937700000	2400501000	2653701000	3030599000	1338799000	2237000000	1740101000	1872701000	3736301000	2022299000	43.6	6.3715	0	67.413
P77318	P77318	Uncharacterized sulfatase YdeN	ydeN	sp|P77318|YDEN_ECOLI Uncharacterized sulfatase YdeN OS=Escherichia coli (strain K12) OX=83333 GN=ydeN PE=3 SV=2	8	8	0.0443462	0.621829	0.609666	0.000213894	0	0.350304	0.00929162	0.0121216	0.153779	0.64652	0.748262	1.07868	0.0191893	0.032823	0.315231	0.00440564	0.0134286	0.275811	7636101	8014003	8285201	6785004	3909602	4331303	6369703	9705897	10293000	1372106	3291567	3516588	2477333	1433408	2995759	23.9	62.801	0	16.175
P75959	P75959	N-acetyl-D-glucosamine kinase	nagK	sp|P75959|NAGK_ECOLI N-acetyl-D-glucosamine kinase OS=Escherichia coli (strain K12) OX=83333 GN=nagK PE=1 SV=1	5	5	0.044485	0.620227	0.916762	0.321583	0.270534	1.04283	0.00768332	0.0107896	0.855394	0.655642	0.756756	0.967685	0.0422716	0.056144	1.34554	0.896916	0.937968	0.984894	17706010	17470000	17667990	16626010	15215010	16646000	18835990	17570990	14963000	25997990	19379000	26424990	14184990	17748990	20737990	18.5	33.042	0	5.076
P77536	P77536	Uncharacterized electron transport protein YkgF	ykgF	sp|P77536|YKGF_ECOLI Uncharacterized electron transport protein YkgF OS=Escherichia coli (strain K12) OX=83333 GN=ykgF PE=3 SV=1	2	2	0.0447179	0.618648	1.27801	0.925264	0.961224	1.01801	0.177106	0.143552	1.24321	0.819817	0.897627	1.02092	0.621415	0.803217	1.05473	0.00687004	0.0150476	1.24929	6275300	6220198	6364097	7706904	7114896	9456597	6516802	5501399	7372998	7187201	5440001	7454901	8226599	7207897	8168304	4	53.051	0.0037915	2.1662
P0ABH0	P0ABH0	Cell division protein FtsA	ftsA	sp|P0ABH0|FTSA_ECOLI Cell division protein FtsA OS=Escherichia coli (strain K12) OX=83333 GN=ftsA PE=1 SV=1	12	12	0.0453611	0.620979	1.11695	0.0172196	0.0163789	1.31563	0.00539886	0.00859398	1.40315	0.0165173	0.0185706	1.37087	0.0121241	0.0236074	2.56789	0.0140148	0.0246381	1.51847	32099990	32026990	35912020	36767010	37108010	37708000	50656970	46972020	39973020	112430000	56167960	98996030	50746990	42983020	59262020	38.6	45.329	0	43.175
P00895	P00895	Anthranilate synthase component 1	trpE	sp|P00895|TRPE_ECOLI Anthranilate synthase component 1 OS=Escherichia coli (strain K12) OX=83333 GN=trpE PE=1 SV=2	17	17	0.0468364	0.637361	0.886949	3.06076e-05	0	0.415598	0.000221219	0.00090625	0.377815	0.000384656	0.00159036	0.541952	0.0582355	0.0780233	0.547386	0.00169552	0.00962437	0.613686	332560200	374120000	374010200	309619900	321150100	326530000	204079900	201370000	180240100	248100000	125340000	245430100	239459900	200360100	224160100	32.9	57.494	0	21.591
P76491	P76491	5-deoxynucleotidase YfbR	yfbR	sp|P76491|5DNU_ECOLI 5-deoxynucleotidase YfbR OS=Escherichia coli (strain K12) OX=83333 GN=yfbR PE=1 SV=1	7	7	0.0479272	0.655724	1.17193	0.0536241	0.0393934	1.51219	0.104894	0.0827954	1.26864	0.00855372	0.010553	1.33786	0.506142	0.686653	1.15504	0.00140938	0.00954913	1.46707	32285980	29507010	30474020	37377000	32639020	38303000	41746980	44799010	37171010	33710990	50988020	26026990	41632000	47692000	46168980	42.7	22.708	0	18.345
P0AF12	P0AF12	5-methylthioadenosine/S-adenosylhomocysteine nucleosidase	mtnN	sp|P0AF12|MTNN_ECOLI 5-methylthioadenosine/S-adenosylhomocysteine nucleosidase OS=Escherichia coli (strain K12) OX=83333 GN=mtnN PE=1 SV=1	5	5	0.0482454	0.654	1.14102	0.000953944	0.00205788	1.62916	0.00324418	0.00752184	1.63267	0.00178187	0.0031677	1.88424	0.0431943	0.0585301	1.803	0.00627106	0.0151333	1.77982	125920000	130360000	146610100	150720000	152540000	155500000	285969800	252830200	222669900	217520100	353470000	183459900	218050100	213859900	290970000	34.1	24.354	0	112.16
P0AAI3	P0AAI3	ATP-dependent zinc metalloprotease FtsH	ftsH	sp|P0AAI3|FTSH_ECOLI ATP-dependent zinc metalloprotease FtsH OS=Escherichia coli (strain K12) OX=83333 GN=ftsH PE=1 SV=1	31	31	0.0483937	0.650367	1.08556	0.0345044	0.0282966	1.09899	0.0184418	0.0195653	1.23918	0.00156743	0.00324841	0.839387	0.0133656	0.024962	1.37597	0.000584132	0.00630631	1.48067	827449400	883730000	865019900	957190200	892309700	947410300	714640100	737999900	709300200	1292601000	1022399000	1246900000	1187100000	1302900000	1327600000	50.6	70.707	0	323.31
P27833	P27833	dTDP-4-amino-4,6-dideoxygalactose transaminase	rffA	sp|P27833|WECE_ECOLI dTDP-4-amino-4,6-dideoxygalactose transaminase OS=Escherichia coli (strain K12) OX=83333 GN=wecE PE=1 SV=2	3	3	0.0489344	0.652973	0.676278	0.22133	0.164307	1.12197	0.0184056	0.0195892	0.712892	0.286354	0.273073	1.1749	0.23316	0.289767	0.726258	0.180874	0.206452	0.828116	5303602	6947597	5880102	4671001	3229299	4442702	8042395	7619300	5734403	5621901	2851299	5177703	5696404	5093001	4241199	12	41.901	0	15.515
P0AES6	P0AES6	DNA gyrase subunit B	gyrB	sp|P0AES6|GYRB_ECOLI DNA gyrase subunit B OS=Escherichia coli (strain K12) OX=83333 GN=gyrB PE=1 SV=2	35	35	0.0493308	0.656698	1.13641	0.0367776	0.0303385	1.16676	0.00998244	0.0132802	1.29056	0.00378183	0.00634642	1.40414	0.651574	0.824298	1.13233	0.00442078	0.0133851	1.37008	448750000	484799700	519930300	568580200	542430100	538249700	657369600	730670100	651940400	726260200	331600000	681900500	621320300	671679700	697059800	52.5	89.949	0	203.67
P0A6U3	P0A6U3	tRNA uridine 5-carboxymethylaminomethyl modification enzyme MnmG	mnmG	sp|P0A6U3|MNMG_ECOLI tRNA uridine 5-carboxymethylaminomethyl modification enzyme MnmG OS=Escherichia coli (strain K12) OX=83333 GN=mnmG PE=1 SV=1	16	16	0.0508734	0.670587	0.868256	0.00635822	0.00676602	0.783771	0.109246	0.0856196	0.915133	0.0170667	0.0190041	0.74379	0.26509	0.331545	0.511074	0.0746177	0.0902917	0.881244	68727020	71003020	71029970	56232010	66812040	60388030	57789030	45179020	54627970	65554020	12792990	55172980	60826960	57183000	68197980	25.8	69.52	0	20.978
P76268	P76268	Transcriptional regulator KdgR	kdgR	sp|P76268|KDGR_ECOLI Transcriptional regulator KdgR OS=Escherichia coli (strain K12) OX=83333 GN=kdgR PE=1 SV=1	18	18	0.0513104	0.671868	1.08374	0.49843	0.520174	0.972162	0.155012	0.122908	1.08301	0.028616	0.0284583	1.059	0.910158	0.963017	0.986188	0.394172	0.454483	1.05527	318249800	332990000	330200100	347000200	373090100	344040200	347670200	351669900	339910100	363680200	256350100	360000100	312179800	349619900	376760100	68.1	30.029	0	146.24
P0AFD4	P0AFD4	NADH-quinone oxidoreductase subunit H	nuoH	sp|P0AFD4|NUOH_ECOLI NADH-quinone oxidoreductase subunit H OS=Escherichia coli (strain K12) OX=83333 GN=nuoH PE=1 SV=1	3	3	0.0517373	0.675868	0.713734	0.533364	0.579362	0.917792	0.223806	0.189118	0.738067	0.223563	0.203986	0.877061	0.00105422	0.004	1.87286	0.192971	0.218085	0.787794	17215000	17087990	19268000	14267990	14332010	10078000	13763010	18246000	15228010	30196010	32898000	37482990	12875000	11493000	18728000	10.2	36.219	0	20.663
P0A908	P0A908	MltA-interacting protein	mipA	sp|P0A908|MIPA_ECOLI MltA-interacting protein OS=Escherichia coli (strain K12) OX=83333 GN=mipA PE=1 SV=1	11	11	0.0519646	0.672654	1.32688	0.000797718	0.00216949	2.60833	0.0109953	0.0137257	1.93763	0.000190444	0.00231579	3.25971	0.0152968	0.0277788	4.21243	0.0118055	0.0213192	1.62348	91267980	91569050	71459000	98861970	121530000	116119900	255599900	284000100	284959900	256490100	705820400	246580200	118449900	151450000	142450000	69.4	27.831	0	115.53
P24186	P24186	Bifunctional protein FolD;Methylenetetrahydrofolate dehydrogenase;Methenyltetrahydrofolate cyclohydrolase	folD	sp|P24186|FOLD_ECOLI Bifunctional protein FolD OS=Escherichia coli (strain K12) OX=83333 GN=folD PE=1 SV=4	9	9	0.0520133	0.669558	0.777936	0.00536224	0.00599058	0.407227	3.96072e-05	0	0.428051	0.0534796	0.048822	0.797558	0.88781	0.953461	1.03524	0.00239787	0.0118312	0.612473	81859030	88646000	89011000	56995970	76782030	69485980	77791020	59443980	70863010	115999900	56708020	108940100	57881010	46503030	55133030	41	31.043	0	33.895
P37330	P37330	Malate synthase G	glcB	sp|P37330|MASZ_ECOLI Malate synthase G OS=Escherichia coli (strain K12) OX=83333 GN=glcB PE=1 SV=3	33	33	0.0522887	0.667639	0.872655	0.000103109	0	0.415185	2.00334e-05	0	0.323482	0.0963879	0.0823426	0.895703	0.0199614	0.0342435	0.40735	4.02459e-05	0	0.371321	823089500	962050600	934270400	781310500	775679600	811220100	816729900	783709600	830569800	427920000	232540000	502530000	336709900	325970200	345090200	54.9	80.488	0	323.31
P00946	P00946	Mannose-6-phosphate isomerase	manA	sp|P00946|MANA_ECOLI Mannose-6-phosphate isomerase OS=Escherichia coli (strain K12) OX=83333 GN=manA PE=1 SV=1	14	14	0.0541112	0.690564	1.10633	0.000182141	0	1.2796	0.00190072	0.00672626	1.26682	0.000675039	0.00187907	1.25417	0.345335	0.454597	1.02056	0.00434144	0.0132549	1.25426	201559900	194659900	189680100	223219900	202190100	223289900	244480000	238390000	251909900	198490000	197230000	202070100	237049900	262480000	236009900	46	42.849	0	323.31
P0AGL2	P0AGL2	Putative reactive intermediate deaminase TdcF	tdcF	sp|P0AGL2|TDCF_ECOLI Putative reactive intermediate deaminase TdcF OS=Escherichia coli (strain K12) OX=83333 GN=tdcF PE=1 SV=1	2	2	0.0542536	0.687643	1.23693	0.653295	0.743965	0.948703	0.127373	0.0990176	1.25709	0.543507	0.62752	0.935623	0.138875	0.171067	1.9819	0.150129	0.170069	1.42951	117840000	102810000	99445970	147120000	128990000	120150000	90526990	92243040	118170000	135240000	437000100	158700100	108499900	152560000	212620000	12.4	14.007	0	7.0237
P75874	P75874	Uncharacterized protein YccU	yccU	sp|P75874|YCCU_ECOLI Uncharacterized protein YccU OS=Escherichia coli (strain K12) OX=83333 GN=yccU PE=1 SV=2	8	8	0.0542701	0.683291	1.18557	0.0131763	0.0135781	1.31648	0.266347	0.234098	1.17585	0.000939219	0.0032	1.56054	0.116584	0.149196	1.34688	0.0851498	0.101268	1.2494	159419900	158729900	184860100	188260000	213720000	193740000	257660000	265380000	259989900	205160100	296919800	187629900	185160000	200630000	245590100	64.2	14.701	0	186.67
Q2MB16	Q2MB16	Uncharacterized protein YobH	yobH	sp|Q2MB16|YOBH_ECOLI Uncharacterized protein YobH OS=Escherichia coli (strain K12) OX=83333 GN=yobH PE=3 SV=1	1	1	0.0543928	0.680654	0.772602	0.0499346	0.0377162	1.33826	0.0537526	0.0461949	1.85669	0.741907	0.83843	0.950425	0.0931668	0.122354	1.36846	0.737436	0.825006	0.950347	14302990	17290000	14814000	12058000	13496010	10382000	11638000	14714000	18367010	22432990	25482990	16422990	11321010	16433000	16902000	13.9	8.514	0.0028791	2.3305
P68688	P68688	Glutaredoxin-1	grxA	sp|P68688|GLRX1_ECOLI Glutaredoxin 1 OS=Escherichia coli (strain K12) OX=83333 GN=grxA PE=1 SV=1	3	3	0.0544423	0.6764	1.39929	0.201015	0.146344	0.747473	0.228314	0.19408	1.33757	0.130388	0.110611	0.787743	0.563072	0.748723	1.42761	0.471671	0.551613	0.801026	2781502	3002400	3595601	5020101	4553901	3598702	2024801	2841601	2551100	2379099	13572000	2705801	2207200	4163201	1679542	28.2	9.6847	0	4.0689
P77202	P77202	Thiol:disulfide interchange protein DsbG	dsbG	sp|P77202|DSBG_ECOLI Thiol:disulfide interchange protein DsbG OS=Escherichia coli (strain K12) OX=83333 GN=dsbG PE=1 SV=2	14	14	0.0545673	0.672919	1.07304	0.0020727	0.00282561	1.23717	0.00326345	0.00748741	1.44995	0.00999756	0.0122365	1.26436	0.118487	0.149903	1.50495	0.0291477	0.0439881	1.18913	95412010	96654960	91757000	97384030	104300000	102930000	108590100	124450000	126560100	130129900	210750000	105170000	102670000	121790100	113790000	64.1	27.495	0	53.814
P75793	P75793	Putative formate acetyltransferase 3	ybiW	sp|P75793|GRE2_ECOLI Probable dehydratase YbiW OS=Escherichia coli (strain K12) OX=83333 GN=ybiW PE=3 SV=1	2	2	0.0549221	0.670691	1.21339	0.0581565	0.0424086	1.19938	0.000640115	0.00313208	0.179614	7.89609e-05	0.00179487	4.99709	0.0917798	0.120591	0.252798	0.0390565	0.0565119	0.609143	64072030	55388000	59791970	81307020	67619000	68950000	261110100	352060200	288030100	10385990	50709030	6509001	29123010	49401000	33336000	3	90.124	0.0028763	2.3234
P78055	P78055	Fructose-6-phosphate aldolase 1	fsaA	sp|P78055|FSAA_ECOLI Fructose-6-phosphate aldolase 1 OS=Escherichia coli (strain K12) OX=83333 GN=fsaA PE=1 SV=2	3	3	0.0555959	0.677227	0.893866	0.00911369	0.00930171	1.27786	0.00127629	0.00565696	1.47247	0.0263113	0.0264549	0.902506	0.943918	0.974325	0.977475	0.208655	0.232484	1.52983	5133501	5319304	5480999	5075102	4458701	4723800	4950600	4849101	4583098	3641801	9499100	4040601	5122403	7689297	13605000	21.8	22.997	0	4.5625
P0AB24	P0AB24	Iron uptake system component EfeO	efeO	sp|P0AB24|EFEO_ECOLI Iron uptake system component EfeO OS=Escherichia coli (strain K12) OX=83333 GN=efeO PE=1 SV=1	20	20	0.0564362	0.684707	1.1953	0.00587343	0.00616514	1.35759	0.0131319	0.0155466	1.59356	0.00562296	0.0086303	1.58096	0.112665	0.145279	0.183854	0.0502452	0.0684058	1.55681	145400000	121199900	137840000	172889900	159110000	150799900	189800000	237740100	212720100	130850000	11382000	10136000	161279900	271440000	209360000	56.8	41.137	0	65.389
P05041	P05041	Aminodeoxychorismate synthase component 1	pabB	sp|P05041|PABB_ECOLI Aminodeoxychorismate synthase component 1 OS=Escherichia coli (strain K12) OX=83333 GN=pabB PE=1 SV=1	3	3	0.0571209	0.69217	0.365481	0.0489821	0.0373883	0.345614	0.288229	0.25941	0.591301	0.0940322	0.0803458	0.434656	0.280416	0.351162	0.598745	0.0844084	0.101065	0.332548	31693980	9987498	27537810	8685495	8092802	6054304	7213903	9363702	10597000	14610000	8400605	15245010	11151000	3784700	7595896	7.5	50.969	0.00050429	3.3838
P31131	P31131	Protein YdeJ	ydeJ	sp|P31131|YDEJ_ECOLI Protein YdeJ OS=Escherichia coli (strain K12) OX=83333 GN=ydeJ PE=3 SV=1	9	9	0.0572509	0.690241	1.23459	0.00831788	0.00886179	1.45145	0.000683584	0.00403571	2.6665	0.792406	0.877415	1.01906	0.570154	0.756962	1.25284	0.00042837	0.00416495	1.77587	65671030	56733000	59853030	67264040	73613970	84745960	67587000	56494980	61804980	55925000	156390000	50138000	105710000	114670000	103029900	56.4	18.321	0	160.78
P07649	P07649	tRNA pseudouridine synthase A	truA	sp|P07649|TRUA_ECOLI tRNA pseudouridine synthase A OS=Escherichia coli (strain K12) OX=83333 GN=truA PE=1 SV=1	6	6	0.0573233	0.687952	0.785094	0.0273461	0.0246498	0.646267	0.0314242	0.0301661	0.743264	0.00435183	0.00790351	0.106034	0.24406	0.302828	0.470512	0.179176	0.204749	0.798399	14496010	16129000	19268990	12288990	13971000	12698010	951060	3484295	1620773	14536000	2617451	12334000	12801000	11065990	16186010	27.4	30.399	0	9.0317
P08244	P08244	Orotidine 5-phosphate decarboxylase	pyrF	sp|P08244|PYRF_ECOLI Orotidine 5-phosphate decarboxylase OS=Escherichia coli (strain K12) OX=83333 GN=pyrF PE=1 SV=1	10	10	0.0574968	0.68519	0.906361	0.000738372	0.00227758	1.71664	0.000256964	0.0008	1.70044	0.000224281	0.002112	1.55726	7.8701e-05	0.00216216	1.97617	0.00911583	0.0193846	1.20483	77942050	83140040	87466940	77514970	73592950	73978960	127650000	127399900	131620000	162720000	157250000	170950000	102650100	100879900	95729020	48.6	26.35	0	31.182
P31677	P31677	Alpha,alpha-trehalose-phosphate synthase [UDP-forming]	otsA	sp|P31677|OTSA_ECOLI Trehalose-6-phosphate synthase OS=Escherichia coli (strain K12) OX=83333 GN=otsA PE=1 SV=3	20	20	0.0579117	0.686485	1.10233	6.48856e-05	0	2.12727	3.59269e-05	0	2.18028	0.000147843	0.00137255	1.67017	0.408249	0.563542	1.12704	0.00333301	0.0137761	1.55786	420800000	461129800	447980000	471310100	512780200	481780100	705140400	763889700	751860400	583980000	388490000	548520300	605470300	731789600	741760000	41.8	53.61	0	228.71
P0AD59	P0AD59	Inhibitor of vertebrate lysozyme	ivy	sp|P0AD59|IVY_ECOLI Inhibitor of vertebrate lysozyme OS=Escherichia coli (strain K12) OX=83333 GN=ivy PE=1 SV=1	6	6	0.0587717	0.691647	1.12615	0.000386809	0.00105263	1.78203	0.000385884	0.00261988	3.92124	0.0233803	0.0247286	0.832918	0.0121674	0.023545	0.369598	0.277184	0.311151	0.900272	136550000	120970100	124340000	135770100	146170000	147809900	98748980	111159900	108120000	40782970	73119970	34774010	98760980	120090000	126359900	48.4	16.872	0	107.83
P52647	P52647	Probable pyruvate-flavodoxin oxidoreductase	ydbK	sp|P52647|NIFJ_ECOLI Probable pyruvate-flavodoxin oxidoreductase OS=Escherichia coli (strain K12) OX=83333 GN=ydbK PE=3 SV=2	31	31	0.0587786	0.687602	0.87428	0.0201953	0.019477	0.798741	0.034029	0.0319713	0.758762	0.00183883	0.0034878	0.557133	0.0865973	0.11376	0.489321	0.442633	0.515569	0.923274	227240000	244010100	270200100	217050100	211240100	218370100	154440000	134060100	125140000	152800000	64986990	176770100	236650100	195429900	254960000	32.7	128.82	0	48.304
P0A7K6	P0A7K6	50S ribosomal protein L19	rplS	sp|P0A7K6|RL19_ECOLI 50S ribosomal protein L19 OS=Escherichia coli (strain K12) OX=83333 GN=rplS PE=1 SV=2	10	10	0.0590683	0.688465	1.11559	0.00259958	0.00394309	1.40456	0.15158	0.119392	1.1367	0.00909555	0.0109949	1.22454	0.116667	0.148865	0.886839	0.0613089	0.0787291	1.31441	2441898000	2662599000	2705700000	2906401000	3038101000	2766099000	3178302000	3033999000	3349800000	2508700000	2325400000	2103299000	3519201000	4006402000	2833400000	67	13.133	0	323.31
P0AEH5	P0AEH5	Protein ElaB	elaB	sp|P0AEH5|ELAB_ECOLI Protein ElaB OS=Escherichia coli (strain K12) OX=83333 GN=elaB PE=1 SV=1	7	7	0.0590709	0.685156	1.43808	0.0779464	0.0557083	1.48844	0.0450892	0.0412257	2.44687	0.444199	0.478382	1.12376	0.377073	0.511545	1.63014	0.0472379	0.0656	2.17741	134209900	89972060	107540000	174130000	135030000	164250100	117209900	141810000	110870100	109680000	463089700	110749900	144839900	288759900	320519800	51.5	11.306	0	323.31
P0A6F5	P0A6F5	60 kDa chaperonin	groL	sp|P0A6F5|CH60_ECOLI 60 kDa chaperonin OS=Escherichia coli (strain K12) OX=83333 GN=groL PE=1 SV=2	39	39	0.0591178	0.681218	1.09252	0.00060378	0.00251969	1.74022	5.1967e-05	0	1.65542	0.000515595	0.0013822	1.54456	0.0118231	0.0228511	1.23431	0.0262861	0.0392012	1.28299	11350000000	12404000000	11702010000	12835000000	12466010000	13426990000	19444030000	17995980000	17349000000	15793010000	13888980000	14124000000	13945990000	17324020000	14400990000	82.8	57.328	0	323.31
P31802	P31802	Nitrate/nitrite response regulator protein NarP	narP	sp|P31802|NARP_ECOLI Nitrate/nitrite response regulator protein NarP OS=Escherichia coli (strain K12) OX=83333 GN=narP PE=3 SV=1	7	7	0.0593562	0.681234	1.11423	0.224239	0.167491	0.750287	0.217523	0.182727	1.41403	0.285275	0.271795	0.800702	0.602072	0.786517	1.014	0.504529	0.595576	0.886028	11590000	10788000	11260000	13239000	11701010	12572010	8224000	12666000	6938299	11325000	11643000	11132000	7479898	9920501	13197010	45.6	23.575	0	18.731
P0AG30	P0AG30	Transcription termination factor Rho	rho	sp|P0AG30|RHO_ECOLI Transcription termination factor Rho OS=Escherichia coli (strain K12) OX=83333 GN=rho PE=1 SV=1	25	25	0.0601674	0.687682	1.09433	0.61836	0.702011	1.03503	0.130329	0.100387	1.12567	0.22773	0.208146	0.946727	0.573975	0.760688	1.09433	0.0161352	0.027549	1.24232	782830500	864779800	863189800	900740500	934680600	909620000	784570000	822240100	768639900	1025900000	687620200	1085601000	954329500	1099400000	1067901000	62.1	47.004	0	323.31
P0AF90	P0AF90	Regulator of ribonuclease activity B	rraB	sp|P0AF90|RRAB_ECOLI Regulator of ribonuclease activity B OS=Escherichia coli (strain K12) OX=83333 GN=rraB PE=1 SV=1	2	2	0.0610824	0.69765	1.27751	0.457004	0.452291	1.09369	0.110253	0.0862666	1.7747	0.0600051	0.0546335	1.35702	0.162116	0.200385	1.92087	0.304026	0.339453	1.38566	90948060	120560000	109790000	144980000	124330000	139239900	127650000	169130000	139339900	161410100	423789700	124730000	87375980	204289900	179430000	10.1	15.603	0	12.636
P0AEE1	P0AEE1	Protein DcrB	dcrB	sp|P0AEE1|DCRB_ECOLI Protein DcrB OS=Escherichia coli (strain K12) OX=83333 GN=dcrB PE=3 SV=1	9	9	0.0612265	0.695438	1.11785	0.00131838	0.00285714	1.14641	0.00524471	0.00864272	1.29752	0.323106	0.315	1.08226	0.437957	0.602134	1.25366	0.417408	0.486105	1.12161	171840000	179490100	172889900	208229900	180970000	197670100	171340100	215889900	182740000	190699900	363820100	151440000	163919900	250119900	183520100	48.6	19.787	0	192.45
P0AFK0	P0AFK0	Metalloprotease PmbA	pmbA	sp|P0AFK0|PMBA_ECOLI Metalloprotease PmbA OS=Escherichia coli (strain K12) OX=83333 GN=pmbA PE=1 SV=1	24	24	0.0613546	0.692916	1.03611	2.83011e-05	0	1.63645	0.0208953	0.0223282	1.17398	0.000291479	0.00183333	1.27335	0.0728965	0.0979539	1.22971	0.000538261	0.00572477	1.42961	406220200	416900000	404939700	432409900	417719800	422299800	504800000	537660000	521670200	567369700	427040000	526329700	552770200	582779800	621990100	68.2	48.369	0	323.31
P52697	P52697	6-phosphogluconolactonase	pgl	sp|P52697|6PGL_ECOLI 6-phosphogluconolactonase OS=Escherichia coli (strain K12) OX=83333 GN=pgl PE=1 SV=2	12	12	0.0614179	0.689067	1.09126	0.00246632	0.00346281	1.42164	0.000121365	0.00126087	1.77562	0.0105419	0.0127844	1.2028	0.00460416	0.00853846	1.48676	0.00171451	0.00943284	1.36429	360410100	400589900	387449800	426179900	407310300	418769900	448589900	447659700	484720300	638689600	517229700	556490000	497089800	546700200	522700300	53.5	36.307	0	66.896
P0A6I3	P0A6I3	Pantothenate kinase	coaA	sp|P0A6I3|COAA_ECOLI Pantothenate kinase OS=Escherichia coli (strain K12) OX=83333 GN=coaA PE=1 SV=1	13	13	0.0622323	0.696442	1.19719	0.741894	0.830036	0.978182	0.00328337	0.0074533	1.54348	0.385569	0.398525	1.07817	0.0535945	0.0717939	1.2796	0.0306516	0.0454884	1.5474	19061000	21689000	23004000	24387020	27630990	24216990	21487990	25430990	21811990	26874010	30844980	24038010	32325020	40714020	26774010	50.6	36.359	0	21.534
P0AB10	P0AB10	Uncharacterized lipoprotein YmbA	ymbA	sp|P0AB10|PQIC_ECOLI Intermembrane transport lipoprotein PqiC OS=Escherichia coli (strain K12) OX=83333 GN=pqiC PE=1 SV=2	6	6	0.0624746	0.694088	1.23834	0.000860217	0.00213333	2.20193	0.00041516	0.00294382	2.7939	0.0107889	0.0132864	1.41689	0.292936	0.372667	1.70581	0.00360894	0.0137762	1.96966	21820990	21401010	17375010	26726020	23228010	24820010	27657010	29977990	27838010	22686000	81840960	21691990	35102000	46456020	38021980	61.5	20.634	0	107.01
P38521	P38521	Uncharacterized protein YggL	yggL	sp|P38521|YGGL_ECOLI Uncharacterized protein YggL OS=Escherichia coli (strain K12) OX=83333 GN=yggL PE=4 SV=2	4	4	0.0626568	0.69471	1.19409	0.00398284	0.0046875	1.91915	0.000186375	0.000966667	2.7444	0.000785127	0.00235498	1.66607	0.855728	0.939624	1.01069	0.0085316	0.0193206	1.97564	80904060	79107980	72419970	103800000	84693990	89766030	118509900	131420100	137630100	80738970	82534960	71809980	131740000	201100000	134910000	33.3	12.88	0	323.31
P16700	P16700	Thiosulfate-binding protein	cysP	sp|P16700|CYSP_ECOLI Thiosulfate-binding protein OS=Escherichia coli (strain K12) OX=83333 GN=cysP PE=1 SV=1	27	27	0.0634825	0.700261	1.0892	0.00975131	0.0102	1.22035	0.00582996	0.00883485	1.69499	0.00196723	0.00379882	0.782539	0.0534579	0.0719029	1.76392	0.01018	0.0202756	1.5847	3447700000	3407100000	3253502000	3725400000	3471801000	3818201000	2525201000	2786201000	2603001000	4892004000	9014111000	4756594000	4472698000	6297598000	5399595000	75.7	37.614	0	323.31
P0A7J7	P0A7J7	50S ribosomal protein L11	rplK	sp|P0A7J7|RL11_ECOLI 50S ribosomal protein L11 OS=Escherichia coli (strain K12) OX=83333 GN=rplK PE=1 SV=2	6	6	0.0636201	0.697557	1.0601	0.00173813	0.00255422	1.46642	0.00224688	0.00622222	1.30547	0.000218194	0.00214634	1.30026	0.939462	0.973683	1.00717	0.00253403	0.0121494	1.56605	1977901000	1864901000	1939599000	1982600000	2066601000	2080299000	2486599000	2561201000	2469501000	1852699000	2295499000	1718700000	2790500000	3428201000	2872399000	43.7	14.875	0	117.42
P39364	P39364	Putative sgc region protein SgcQ	sgcQ	sp|P39364|SGCQ_ECOLI Putative sgc region protein SgcQ OS=Escherichia coli (strain K12) OX=83333 GN=sgcQ PE=3 SV=1	10	10	0.0648019	0.710602	1.11903	9.33549e-05	0	0.139586	0.000781977	0.00375104	0.000608656	0.00835786	0.0103916	0.771267	9.9496e-06	0	0.00129068	0.000153491	0.00253061	0.00293252	835459600	733590300	730059800	860390300	860470000	846889500	583719800	563119800	624519800	618700	1305799	1190801	3211298	978620	3590599	51.5	29.354	0	116.04
P0AEA2	P0AEA2	Curli production assembly/transport component CsgG	csgG	sp|P0AEA2|CSGG_ECOLI Curli production assembly/transport component CsgG OS=Escherichia coli (strain K12) OX=83333 GN=csgG PE=1 SV=1	5	5	0.0664676	0.722995	0.398175	0.0173561	0.0166103	4.1834	0.37015	0.353531	1.47628	0.0452773	0.0426448	2.85821	0.515521	0.699834	1.38296	0.297458	0.33164	1.60971	4186138	1211284	1996248	818770	996249	783370	5787199	6986597	5845501	2023000	5122802	2583439	2843800	4867303	3050199	22.4	30.557	0	14.854
P0AC59	P0AC59	Glutaredoxin-2	grxB	sp|P0AC59|GLRX2_ECOLI Glutaredoxin 2 OS=Escherichia coli (strain K12) OX=83333 GN=grxB PE=1 SV=1	13	13	0.0665042	0.719149	1.1849	0.000286851	0	2.50776	0.00421802	0.0074332	2.16135	5.50735e-05	0.00237288	3.73376	0.00298956	0.0046385	2.62508	0.0105746	0.0202807	1.73595	212740000	253049900	229760000	290459900	250510100	282789900	793830000	951890000	852029700	507579900	802149600	549540100	322829900	432040200	463920000	71.6	24.35	0	204.42
P52106	P52106	CsgBAC operon transcriptional regulatory protein	csgD	sp|P52106|CSGD_ECOLI CsgBAC operon transcriptional regulatory protein OS=Escherichia coli (strain K12) OX=83333 GN=csgD PE=1 SV=1	3	3	0.0667565	0.716783	0.435023	0.00756547	0.00789916	2.82247	0.00642215	0.00916579	2.95776	0.00649391	0.00881382	2.79372	0.229561	0.283916	1.50235	0.0118186	0.0212743	2.62892	3490625	2034485	3809101	1868845	1545229	771171	8571105	8021402	8579097	3079613	4687202	6354504	7992798	6591198	9329300	16.2	24.935	0	4.7769
P0AD21	P0AD21	Uncharacterized protein YejG	yejG	sp|P0AD21|YEJG_ECOLI Uncharacterized protein YejG OS=Escherichia coli (strain K12) OX=83333 GN=yejG PE=1 SV=1	3	3	0.0671267	0.719411	1.22007	0.210382	0.154503	1.31078	0.0616922	0.0524255	1.28246	0.272307	0.255877	1.13624	0.191667	0.231676	0.431053	0.119334	0.140007	1.17616	2848801	2363099	2700701	2925700	3561999	3168502	2566099	3423799	3035600	409000	1437005	2477599	2745399	3341101	3225002	29.8	12.525	0.003327	2.2012
P33358	P33358	HTH-type transcriptional regulator MlrA	mlrA	sp|P33358|MLRA_ECOLI HTH-type transcriptional regulator MlrA OS=Escherichia coli (strain K12) OX=83333 GN=mlrA PE=1 SV=1	6	6	0.0672589	0.716901	1.75094	0.0345483	0.0283815	1.9921	0.0418422	0.0382975	1.91346	0.312745	0.302359	1.47479	0.199156	0.241292	1.4982	0.244968	0.273937	1.30827	8585201	4674299	6871104	8991997	11364000	14484990	16024000	5961201	9259298	13587010	6937904	9836694	8500799	9892695	7341998	35.4	28.046	0	7.2631
P0AFW8	P0AFW8	Protein rof	rof	sp|P0AFW8|ROF_ECOLI Protein rof OS=Escherichia coli (strain K12) OX=83333 GN=rof PE=1 SV=1	2	2	0.0674613	0.715583	1.35741	0.0109304	0.0111621	1.45381	0.0145157	0.0164473	2.09274	0.487591	0.542197	1.08449	0.0352777	0.0487972	1.88202	0.0662039	0.0837074	1.26395	6291000	6693998	7050398	7321497	11014990	9208099	8474798	5996201	7452299	18612010	9746995	10910010	9936094	8183004	7373602	38.1	9.4795	0	41.592
P0A9G4	P0A9G4	HTH-type transcriptional regulator CueR	cueR	sp|P0A9G4|CUER_ECOLI HTH-type transcriptional regulator CueR OS=Escherichia coli (strain K12) OX=83333 GN=cueR PE=1 SV=1	4	4	0.0679742	0.71542	1.22014	0.0111498	0.0112944	1.34398	0.018799	0.0197813	2.02885	0.388929	0.402544	0.912301	0.0919525	0.120615	1.39796	0.0502179	0.0684885	1.63214	18425990	15893990	15063000	21861010	18211000	20128010	14377010	17254010	13503000	17882990	28958000	23273010	19223010	32354010	30838990	28.9	15.235	0	6.702
P0A9Q1	P0A9Q1	Aerobic respiration control protein ArcA	arcA	sp|P0A9Q1|ARCA_ECOLI Aerobic respiration control protein ArcA OS=Escherichia coli (strain K12) OX=83333 GN=arcA PE=1 SV=1	17	17	0.0683099	0.714619	0.917394	0.000987552	0.00201893	0.734699	0.119402	0.0934158	0.877474	0.0094645	0.0115846	0.764521	0.553543	0.739739	0.889022	0.0435636	0.0616654	0.911284	1176900000	1121500000	1179100000	1013000000	1125400000	1054001000	944150500	794039900	927630300	1313099000	722460200	1152700000	1098900000	1002100000	1069500000	60.9	27.292	0	229.51
P0ADP9	P0ADP9	Protein YihD	yihD	sp|P0ADP9|YIHD_ECOLI Protein YihD OS=Escherichia coli (strain K12) OX=83333 GN=yihD PE=1 SV=1	6	6	0.0690405	0.718072	1.34828	0.0130145	0.0132951	1.6788	0.0215603	0.0225374	1.82552	0.051683	0.0476259	1.36609	0.431618	0.593253	1.36633	0.215467	0.240256	1.39906	70783980	55126030	60666020	99925020	80877960	71790990	77170990	100619900	77719990	64308970	169240000	55479020	56208970	104230000	110650000	70.8	10.273	0	10.046
P0AFM4	P0AFM4	Phosphate starvation-inducible protein PsiF	psiF	sp|P0AFM4|PSIF_ECOLI Phosphate starvation-inducible protein PsiF OS=Escherichia coli (strain K12) OX=83333 GN=psiF PE=1 SV=1	4	4	0.0692197	0.716041	0.56366	0.163739	0.116193	1.49607	0.681235	0.769367	1.12339	0.912665	0.955506	0.974741	0.0244041	0.0386424	0.380398	0.102542	0.121688	1.64897	120669900	65199040	63526980	53743980	43785020	38036000	69214040	86241980	77545000	24013010	42771980	26786010	140470000	151460100	105330000	34	11.686	0	6.3154
P0AA41	P0AA41	tRNA pseudouridine synthase C	truC	sp|P0AA41|TRUC_ECOLI tRNA pseudouridine synthase C OS=Escherichia coli (strain K12) OX=83333 GN=truC PE=1 SV=1	3	3	0.0694552	0.713563	1.8817	0.314497	0.262601	1.22513	0.171038	0.138026	1.49818	0.3718	0.380068	0.557378	0.321112	0.415774	1.77823	0.584749	0.688844	1.25569	2738200	4661599	2897201	4671649	9027040	5842704	3439802	3045199	611333	9389896	2269194	9759102	6271775	2108400	5537102	13.1	29.665	0	4.0564
Q06067	Q06067	Signal transduction histidine-protein kinase AtoS	atoS	sp|Q06067|ATOS_ECOLI Signal transduction histidine-protein kinase AtoS OS=Escherichia coli (strain K12) OX=83333 GN=atoS PE=1 SV=1	2	2	0.0696556	0.712667	0.715114	0.0175976	0.0169194	0.339593	0.00118549	0.00522667	0.209307	0.0550286	0.0503945	0.43166	0.0736844	0.0992	0.357632	0.00103854	0.00876316	0.154605	10568000	10705990	8276902	6524302	8640804	6074701	2508346	4210138	7132300	1519123	5646556	4993663	1088225	1454569	2186292	3.6	67.789	0.001457	2.5393
P0ACB0	P0ACB0	Replicative DNA helicase	dnaB	sp|P0ACB0|DNAB_ECOLI Replicative DNA helicase OS=Escherichia coli (strain K12) OX=83333 GN=dnaB PE=1 SV=1	19	19	0.0696788	0.709085	1.17886	0.0176278	0.0170316	1.2525	0.00543295	0.00857786	1.36784	0.881914	0.937352	1.01299	0.116559	0.149362	1.32128	0.0141298	0.0248155	1.26813	50849000	55184000	47566000	57044970	66746000	57429990	55934020	55024020	45079980	87761040	57103000	61434970	60280980	68384970	66029980	56.5	52.389	0	34.833
P76177	P76177	Protein YdgH	ydgH	sp|P76177|YDGH_ECOLI Protein YdgH OS=Escherichia coli (strain K12) OX=83333 GN=ydgH PE=1 SV=1	23	23	0.0699537	0.70814	1.12748	0.305493	0.252796	1.07129	0.0614707	0.0520943	0.790011	0.0177671	0.0196923	0.864755	0.014986	0.0281168	0.715021	0.0281978	0.0424727	1.20298	722469700	815279900	796260100	924019500	827480100	879170000	674580000	676600400	664499800	521699900	642849900	511220000	891769500	1013401000	903489500	73.9	33.903	0	323.31
P75946	P75946	Uncharacterized protein YcfL	ycfL	sp|P75946|YCFL_ECOLI Uncharacterized protein YcfL OS=Escherichia coli (strain K12) OX=83333 GN=ycfL PE=4 SV=1	2	2	0.0701194	0.707065	3.87859	0.0204546	0.0195245	6.01643	0.0170442	0.0183611	6.72139	0.0197293	0.0213982	5.95726	0.0130418	0.0245918	9.75189	0.0325736	0.0481018	4.8776	8364400	1753519	2571376	7503937	14621000	20057000	22633010	18900000	18640010	29159000	53184030	22554000	12621000	21240000	16326010	16	13.981	0.0069767	1.9088
P0A7W1	P0A7W1	30S ribosomal protein S5	rpsE	sp|P0A7W1|RS5_ECOLI 30S ribosomal protein S5 OS=Escherichia coli (strain K12) OX=83333 GN=rpsE PE=1 SV=2	10	10	0.0702547	0.704178	1.10869	0.0796048	0.0563333	1.12468	0.363571	0.34457	1.07685	0.0786411	0.0670273	1.10605	0.0676478	0.0901925	0.851553	0.143187	0.162888	1.23329	2319701000	2421199000	2571400000	2712201000	2559502000	2835198000	2863799000	2626501000	2597999000	1851000000	2222499000	2167800000	2876800000	3708300000	2539501000	72.5	17.603	0	323.31
P0AAB8	P0AAB8	Universal stress protein D	uspD	sp|P0AAB8|USPD_ECOLI Universal stress protein D OS=Escherichia coli (strain K12) OX=83333 GN=uspD PE=2 SV=1	4	4	0.0726939	0.722049	1.07362	2.61772e-05	0	2.63852	0.0012896	0.00562058	2.24526	0.000659369	0.00192381	1.67013	0.22296	0.274442	1.28487	0.000219051	0.004125	2.06927	31509980	30315010	32124020	33585010	32262980	35045990	50066000	57843980	49360980	35350000	56668980	32491990	61088000	72235990	61614000	33.1	16.293	0	20.463
P0AB96	P0AB96	Arsenate reductase	arsC	sp|P0AB96|ARSC_ECOLI Arsenate reductase OS=Escherichia coli (strain K12) OX=83333 GN=arsC PE=2 SV=1	4	4	0.072808	0.721039	1.9062	0.0408591	0.0319858	1.94448	0.0361415	0.0338486	2.51128	0.314558	0.304541	0.755536	0.811144	0.923295	1.12546	0.0466882	0.0648408	2.92602	1792399	1745001	3384000	3811101	5672498	3391099	1325843	1890500	1821199	2280475	5209597	1270053	4167099	5439800	11697000	34	15.853	0	5.1445
P30126	P30126	3-isopropylmalate dehydratase small subunit	leuD	sp|P30126|LEUD_ECOLI 3-isopropylmalate dehydratase small subunit OS=Escherichia coli (strain K12) OX=83333 GN=leuD PE=1 SV=3	9	9	0.0729292	0.719259	1.14405	1.10796e-06	0	0.261273	0.000209852	0.000928	0.380908	4.33322e-07	0	0.162383	9.21442e-05	0.00205128	0.258602	0.00222713	0.0117031	1.18421	636159800	589280100	601730100	722570000	629939700	742070000	102400000	98379940	95874050	175600100	165739900	134040000	717839700	732319900	712600300	70.1	22.487	0	323.31
P55734	P55734	Inner membrane protein YgaP	ygaP	sp|P55734|YGAP_ECOLI Inner membrane protein YgaP OS=Escherichia coli (strain K12) OX=83333 GN=ygaP PE=1 SV=1	6	6	0.0730743	0.716835	0.693684	0.00205217	0.00283814	0.712451	0.121642	0.0951763	0.790079	0.000708579	0.00182805	0.641239	0.0985247	0.128358	0.843376	0.072611	0.0887542	0.86293	43872000	38556020	42422980	29685000	36555010	22074010	27897990	26693000	25408000	32410990	33001980	40245000	34694020	33782020	39342980	50.6	18.639	0	44.556
P0C0R7	P0C0R7	Ribosomal RNA large subunit methyltransferase E	rlmE	sp|P0C0R7|RLME_ECOLI Ribosomal RNA large subunit methyltransferase E OS=Escherichia coli (strain K12) OX=83333 GN=rlmE PE=1 SV=1	8	8	0.0731129	0.713372	1.07794	0.00703673	0.00690593	1.29749	0.00523079	0.00865909	1.33348	0.0327282	0.0316156	1.1572	0.0193365	0.0335011	1.51491	0.0144345	0.0251815	1.38333	100910000	98172960	93433960	101040000	105479900	108780000	105010100	113449900	120400000	147309900	178010000	122719900	117309900	151850000	137550000	52.2	23.335	0	88.052
P37749	P37749	Beta-1,6-galactofuranosyltransferase WbbI	wbbI	sp|P37749|WBBI_ECOLI Beta-1,6-galactofuranosyltransferase WbbI OS=Escherichia coli (strain K12) OX=83333 GN=wbbI PE=1 SV=1	10	10	0.0732509	0.710327	0.896021	0.0566749	0.0412857	1.10887	0.00270267	0.00720393	0.784111	0.676351	0.779921	0.984599	0.466166	0.639412	1.11648	0.286916	0.32057	1.05876	80291990	76500950	82233040	68267980	68834970	77323980	75222030	82533980	77657960	105250000	68042990	98158940	83611040	78849030	90931940	38.5	37.757	0	46.687
P00811	P00811	Beta-lactamase	ampC	sp|P00811|AMPC_ECOLI Beta-lactamase OS=Escherichia coli (strain K12) OX=83333 GN=ampC PE=1 SV=1	9	9	0.0732942	0.706928	1.19215	0.000361864	0.00107317	2.15611	0.00174128	0.00582029	2.63409	0.0277315	0.0274387	1.28985	0.00617999	0.0127123	1.32279	0.010706	0.0206174	1.39632	19068000	21114990	17826010	25053000	20831010	23301000	22220000	26631980	26026990	26424010	25468000	24684990	25733010	30062010	25257990	28.9	41.555	0	19.613
P0AG82	P0AG82	Phosphate-binding protein PstS	pstS	sp|P0AG82|PSTS_ECOLI Phosphate-binding protein PstS OS=Escherichia coli (strain K12) OX=83333 GN=pstS PE=1 SV=1	22	22	0.0738563	0.708514	1.17377	0.00108822	0.00228739	1.46412	0.00213056	0.00635356	1.95721	0.445341	0.480032	0.946666	0.84729	0.936046	1.09631	0.00910618	0.0194299	1.61029	387759800	394220100	349980200	493859700	416859800	420240200	321419900	382390000	369280100	263669800	1008199000	265180100	549309800	731579600	555879700	63.6	37.023	0	192.57
P0AC75	P0AC75	3-deoxy-D-manno-octulosonic acid transferase	waaA	sp|P0AC75|KDTA_ECOLI 3-deoxy-D-manno-octulosonic acid transferase OS=Escherichia coli (strain K12) OX=83333 GN=waaA PE=1 SV=1	8	8	0.0749671	0.717289	0.798098	0.544006	0.59854	1.07165	0.10978	0.0858337	1.20949	0.107973	0.0915178	1.22141	0.209952	0.256422	1.45343	0.576959	0.680964	1.05611	12221990	14925990	16382010	11025990	12393000	11117990	18145010	16134990	18600010	25988990	13085000	26981990	14583010	15170000	15913000	21.9	47.29	0	12.103
P06983	P06983	Porphobilinogen deaminase	hemC	sp|P06983|HEM3_ECOLI Porphobilinogen deaminase OS=Escherichia coli (strain K12) OX=83333 GN=hemC PE=1 SV=2	14	14	0.075066	0.716151	1.09598	0.00165796	0.00261084	1.66458	0.00899657	0.011396	1.53305	0.601127	0.698284	0.978128	0.426019	0.588447	1.26608	0.0755898	0.091419	1.16194	123220000	112829900	127840000	131260000	131680100	135370000	117419900	121380000	116700000	127360000	258149900	109710000	128110000	152560000	142659900	57.2	33.851	0	73.329
P09546	P09546	Bifunctional protein PutA;Proline dehydrogenase;Delta-1-pyrroline-5-carboxylate dehydrogenase	putA	sp|P09546|PUTA_ECOLI Bifunctional protein PutA OS=Escherichia coli (strain K12) OX=83333 GN=putA PE=1 SV=3	24	24	0.0750694	0.712789	1.17141	0.00375892	0.00483005	1.39899	0.000809717	0.0036748	2.15556	0.38186	0.393281	0.829068	0.136689	0.169728	0.782268	0.00834624	0.0189734	1.29956	53351000	55044980	62777980	61212010	68588970	70582980	60716970	52508980	32952980	47023030	35234980	53266010	73819020	71411970	76756050	21.4	143.81	0	27.964
P77324	P77324	Putative xanthine dehydrogenase YagS FAD-binding subunit	yagS	sp|P77324|PAOB_ECOLI Aldehyde oxidoreductase FAD-binding subunit PaoB OS=Escherichia coli (strain K12) OX=83333 GN=paoB PE=1 SV=1	2	2	0.0751676	0.71	0.466389	0.0728606	0.0518928	0.748804	0.0433422	0.0395586	0.449485	0.148156	0.12703	0.310882	0.139864	0.171501	0.48643	0.0043302	0.0133421	0.323202	5329898	4030800	5993103	1322170	3538998	2791500	1789818	485987	4447486	4759205	1304264	2387395	1201472	1843678	1962395	7.9	33.857	0.0028777	2.327
P31455	P31455	Uncharacterized protein YidR	yidR	sp|P31455|YIDR_ECOLI Uncharacterized protein YidR OS=Escherichia coli (strain K12) OX=83333 GN=yidR PE=4 SV=4	11	11	0.0753011	0.708744	1.1445	0.00317666	0.00473143	0.721287	0.16265	0.130601	1.0982	0.920706	0.961161	1.00679	0.00894861	0.0171343	1.41842	0.14071	0.161437	0.768741	49046980	43638000	42831000	50844030	48796020	55392980	41285000	47144970	48065020	69889980	57035020	65629020	44978000	32761020	28262990	39	46.186	0	24.335
P0A8H8	P0A8H8	DNA gyrase inhibitor YacG	yacG	sp|P0A8H8|YACG_ECOLI DNA gyrase inhibitor YacG OS=Escherichia coli (strain K12) OX=83333 GN=yacG PE=1 SV=1	1	1	0.0759537	0.710667	0.451226	0.35921	0.316584	1.45595	0.084288	0.0691415	2.1833	0.648029	0.749987	0.819169	0.600905	0.786114	1.59058	0.722769	0.815719	0.797121	3224111	6141102	2545006	1301754	1417125	2509513	3544111	1670701	4678003	1331627	18138990	8394843	1314708	8087005	2400495	30.8	7.3061	0	7.999
P0ACU0	P0ACU0	Uncharacterized HTH-type transcriptional regulator YbiH	ybiH	sp|P0ACU0|CECR_ECOLI HTH-type transcriptional dual regulator CecR OS=Escherichia coli (strain K12) OX=83333 GN=cecR PE=1 SV=1	2	2	0.0760688	0.708387	1.12292	0.458779	0.45579	1.05954	0.177153	0.143454	1.21816	0.119278	0.101008	1.27108	0.458191	0.625708	0.959543	0.469029	0.548428	1.1156	9389201	9457197	10558000	11348000	11314000	10339000	13916010	9879194	14004000	8896394	9336099	9972100	8427403	11940010	12935990	9.4	25.016	0	4.6309
P0ADK8	P0ADK8	Uncharacterized protein YibL	yibL	sp|P0ADK8|YIBL_ECOLI Uncharacterized protein YibL OS=Escherichia coli (strain K12) OX=83333 GN=yibL PE=1 SV=1	7	7	0.0764107	0.713541	1.10981	0.0071476	0.00733429	1.18184	0.00549158	0.00846667	1.59436	0.000998862	0.0030888	0.844162	0.503893	0.685178	1.18004	0.0544153	0.0720562	1.34537	62766020	64775980	66188960	77363030	67221020	70734960	53483000	55761980	54280960	66073030	118430000	56510000	72016010	105060000	86612990	55	13.696	0	45.177
P28630	P28630	DNA polymerase III subunit delta	holA	sp|P28630|HOLA_ECOLI DNA polymerase III subunit delta OS=Escherichia coli (strain K12) OX=83333 GN=holA PE=1 SV=1	5	5	0.0769928	0.715196	0.952435	0.148922	0.106029	1.10995	0.446623	0.465092	0.804133	0.501857	0.563485	1.07467	0.631313	0.807372	1.12849	0.129268	0.150257	1.23181	12429000	11977000	11800990	11385010	11805000	11292990	14042990	10702000	14508010	16627000	8565395	17727000	17415990	12084000	15602000	12.8	38.703	0	4.6695
A0A385XJE6;P0CE58;P0CE57;P0CE56;P0CE55;P0CE54;P0CE53;P0CE52;P0CE51;P0CE50;P0CE49;P76071	A0A385XJE6;P0CE58;P0CE57;P0CE56;P0CE55;P0CE54;P0CE53;P0CE52;P0CE51;P0CE50;P0CE49;P76071	Transposase InsH for insertion sequence element IS5T;Transposase InsH for insertion sequence element IS5R;Transposase InsH for insertion sequence element IS5LO;Transposase InsH for insertion sequence element IS5K;Transposase InsH for insertion sequence element IS5I;Transposase InsH for insertion sequence element IS5H;Transposase InsH for insertion sequence element IS5F;Transposase InsH for insert…	insH11;insH10;insH9;insH8;insH7;insH6;insH4;insH3;insH2;insH1;insH5	sp|A0A385XJE6|INH21_ECOLI Transposase InsH for insertion sequence element IS5U OS=Escherichia coli (strain K12) OX=83333 GN=insH21 PE=3 SV=2;sp|P0CE58|INH11_ECOLI Transposase InsH for insertion sequence element IS5T OS=Escherichia coli (strain K12) OX=8333	3	3	0.0775444	0.716164	0.854916	0.00909429	0.00932629	0.435382	0.0241812	0.0250705	0.623824	0.754302	0.84772	0.958718	0.198544	0.240682	1.28527	0.00148	0.0104751	0.480469	32223000	34739000	31455000	31243000	25479990	27637020	27239010	28427990	40069000	57833970	34489000	37478980	18796010	14755010	14082000	10.4	37.851	0	10.197
Q46948	Q46948	Probable protein deglycase	yajL	sp|Q46948|YAJL_ECOLI Protein/nucleic acid deglycase 3 OS=Escherichia coli (strain K12) OX=83333 GN=yajL PE=1 SV=2	6	6	0.0777179	0.715276	1.10594	0.623652	0.708611	0.964461	0.441674	0.457721	0.964553	0.505405	0.568552	1.04485	0.980125	0.989003	1.00275	0.554079	0.653297	0.94745	65161040	61157010	68420960	68401970	75283020	71623950	65742000	74769020	63274010	76896010	54679990	65384020	55813980	71564040	58056970	32.1	20.777	0	102.21
P45799	P45799	ADP compounds hydrolase NudE	nudE	sp|P45799|NUDE_ECOLI ADP compounds hydrolase NudE OS=Escherichia coli (strain K12) OX=83333 GN=nudE PE=1 SV=1	6	6	0.0778284	0.713027	1.13442	0.891144	0.94108	0.986114	0.775861	0.849238	1.0273	0.0594394	0.0540786	1.22588	0.000406252	0.00449315	2.46713	0.230559	0.256507	1.14661	17064990	14498000	16930000	18526990	18122000	18213000	20912990	20936000	17623990	45056980	36487020	38259980	16907010	17189000	21727000	53.2	21.153	0	18.613
Q46868	Q46868	Uncharacterized protein YqiC	yqiC	sp|Q46868|UBIK_ECOLI Ubiquinone biosynthesis accessory factor UbiK OS=Escherichia coli (strain K12) OX=83333 GN=ubiK PE=1 SV=2	8	8	0.0785518	0.717543	1.22594	0.0523141	0.0386723	1.1645	0.0577151	0.0489654	1.65872	0.19737	0.177243	1.12576	0.797263	0.913296	1.08293	0.321471	0.362491	1.25677	175569900	166970000	176380000	249260000	187050100	204329900	176900100	225520000	184910000	121570000	324670000	166370000	145730000	254010200	277270100	65.6	11.276	0	17.349
P0CE48;P0CE47	P0CE48;P0CE47	Elongation factor Tu 2;Elongation factor Tu 1	tufB;tufA	sp|P0CE48|EFTU2_ECOLI Elongation factor Tu 2 OS=Escherichia coli (strain K12) OX=83333 GN=tufB PE=1 SV=1;sp|P0CE47|EFTU1_ECOLI Elongation factor Tu 1 OS=Escherichia coli (strain K12) OX=83333 GN=tufA PE=1 SV=1	30	30	0.0786175	0.714679	0.918516	0.83584	0.903679	0.991254	0.556987	0.624298	1.01255	0.0749439	0.0636467	1.04696	0.0343037	0.0472254	1.25705	0.786451	0.861016	0.985433	37371010000	37908040000	35587030000	36043010000	33250030000	32599040000	38772030000	38665050000	38593040000	50411030000	40409040000	49159990000	35999000000	39682990000	33771030000	85.5	43.313	0	323.31
P04425	P04425	Glutathione synthetase	gshB	sp|P04425|GSHB_ECOLI Glutathione synthetase OS=Escherichia coli (strain K12) OX=83333 GN=gshB PE=1 SV=1	14	14	0.0788379	0.7144	0.927171	0.00104252	0.00193353	0.693255	0.022203	0.0230911	0.68698	0.00123553	0.0028777	0.610895	0.769386	0.893694	0.990843	0.0232052	0.035539	0.79131	166859900	171900000	175179900	149880000	163840000	163090100	95356020	116679900	102959900	165260100	165559900	178650100	130970000	123940000	153380000	51.9	35.56	0	34.587
P0AAN3	P0AAN3	Hydrogenase isoenzymes nickel incorporation protein HypB	hypB	sp|P0AAN3|HYPB_ECOLI Hydrogenase maturation factor HypB OS=Escherichia coli (strain K12) OX=83333 GN=hypB PE=1 SV=1	5	5	0.0789419	0.711752	0.857961	0.00231576	0.00354334	0.447042	0.000230897	0.000885496	0.347248	0.00180857	0.00352	0.488547	0.00120708	0.00365625	0.222024	0.000508814	0.00518095	0.56053	18302990	21932000	20685990	18322000	16148990	17724000	11577990	9479304	8822405	5762104	3201459	4926599	11107000	11777010	11180000	22.4	31.565	0	7.2278
P75798	P75798	Glutathione transport system permease protein GsiC	gsiC	sp|P75798|GSIC_ECOLI Glutathione transport system permease protein GsiC OS=Escherichia coli (strain K12) OX=83333 GN=gsiC PE=1 SV=1	4	4	0.0790796	0.709163	0.767355	0.00994674	0.0103134	0.615707	0.00960995	0.0125075	0.51138	0.659703	0.760135	0.928858	0.760148	0.889489	0.914486	0.175046	0.200138	0.819458	3856398	3741101	5009103	2812400	3351201	3464598	4962297	3473702	3359798	3163701	6333603	2758201	3058502	3966700	3277801	15.7	34.066	0	6.7014
P0AB65;P30131	P0AB65	Acylphosphatase	yccX	sp|P0AB65|ACYP_ECOLI Acylphosphatase OS=Escherichia coli (strain K12) OX=83333 GN=yccX PE=1 SV=1	5	5	0.0794857	0.709965	1.16002	0.000393656	0.00104762	1.68103	0.000387758	0.00260465	1.71967	0.00711431	0.00921869	1.25176	0.531766	0.717066	1.16108	0.167229	0.19008	1.18173	272810000	260259900	242980000	322500200	309419800	269869900	306949900	338990100	325200100	238830100	461890000	244790100	294940200	364100200	265120100	43.5	10.3	0	24.199
P0A8A2	P0A8A2	Probable transcriptional regulatory protein YeeN	yeeN	sp|P0A8A2|YEEN_ECOLI Probable transcriptional regulatory protein YeeN OS=Escherichia coli (strain K12) OX=83333 GN=yeeN PE=1 SV=1	7	7	0.0797411	0.708629	1.13216	0.327377	0.277361	0.920004	0.636031	0.722231	0.967077	0.000394364	0.00155294	1.80101	0.00338454	0.00599111	1.52532	0.991141	0.994727	1.00078	49452030	58387960	54916970	58673970	62590020	62658990	101580000	93790020	97229010	88367040	84492020	75368960	49747970	57933990	55147020	38.2	25.867	0	35.649
P0ADP7	P0ADP7	Ubiquinone biosynthesis protein UbiJ	ubiJ	sp|P0ADP7|UBIJ_ECOLI Ubiquinone biosynthesis accessory factor UbiJ OS=Escherichia coli (strain K12) OX=83333 GN=ubiJ PE=1 SV=1	3	3	0.0798562	0.707113	0.715169	0.37078	0.332165	1.22487	0.285309	0.256318	0.795401	0.495636	0.553873	1.1193	0.0519589	0.0702092	1.87973	0.167365	0.190072	0.80592	19205990	28598990	24455010	16694000	19857010	14822010	24000000	24340990	32244010	33374010	65393010	40879010	17606990	18812990	21227000	19.4	22.152	0	25.752
P0A6W9	P0A6W9	Glutamate--cysteine ligase	gshA	sp|P0A6W9|GSH1_ECOLI Glutamate--cysteine ligase OS=Escherichia coli (strain K12) OX=83333 GN=gshA PE=1 SV=1	13	13	0.0804661	0.711654	1.11212	0.0525733	0.0387434	1.20667	0.606975	0.688063	1.02691	0.114411	0.0967954	1.14286	0.0269537	0.0411072	1.39711	0.187488	0.213552	0.851173	99253020	114680000	112780000	121150000	120940000	120510000	120300000	116660000	136540000	166130000	127670100	165050100	81440950	110240000	88172980	34	58.269	0	137.38
P0AAI5	P0AAI5	3-oxoacyl-[acyl-carrier-protein] synthase 2	fabF	sp|P0AAI5|FABF_ECOLI 3-oxoacyl-[acyl-carrier-protein] synthase 2 OS=Escherichia coli (strain K12) OX=83333 GN=fabF PE=1 SV=2	13	13	0.0805081	0.708586	0.872757	0.531803	0.575949	1.02463	0.21173	0.178169	0.95374	0.804716	0.886991	0.990567	0.0149655	0.0281854	1.38644	0.598793	0.706532	1.04128	246540100	265430100	240010100	200640000	218019900	238690000	254340100	251450100	238700000	363410100	300430200	383380100	255280000	294099900	236190000	51.3	43.045	0	213.17
P0A9L5	P0A9L5	Peptidyl-prolyl cis-trans isomerase C	ppiC	sp|P0A9L5|PPIC_ECOLI Peptidyl-prolyl cis-trans isomerase C OS=Escherichia coli (strain K12) OX=83333 GN=ppiC PE=1 SV=2	4	4	0.0808338	0.708172	0.811453	0.000376853	0.00105769	2.26361	0.182464	0.147566	1.1955	0.000227557	0.00207874	2.20522	0.0218734	0.0367059	1.5712	0.0228701	0.0351843	1.46838	41310000	51143020	44675990	42049980	34831980	34432000	100430000	99259060	101540000	60275960	87127980	69711970	61327040	61269980	79529960	31.2	10.232	0	9.7935
P23894	P23894	Protease HtpX	htpX	sp|P23894|HTPX_ECOLI Protease HtpX OS=Escherichia coli (strain K12) OX=83333 GN=htpX PE=1 SV=1	9	9	0.0809265	0.705744	1.08474	0.165085	0.117351	1.27284	0.524097	0.576947	1.06036	0.933594	0.969022	0.997336	4.98803e-05	0	14.9816	0.0391396	0.0565428	1.14397	74586960	81576940	78123000	85489010	87682990	80939040	80235010	76367970	76958970	912479400	1501299000	1166799000	85080060	95848950	87265040	32.4	31.923	0	150.62
P05100	P05100	DNA-3-methyladenine glycosylase 1	tag	sp|P05100|3MG1_ECOLI DNA-3-methyladenine glycosylase 1 OS=Escherichia coli (strain K12) OX=83333 GN=tag PE=1 SV=1	3	3	0.0813756	0.705021	2.49051	0.165668	0.11754	2.43368	0.0469707	0.0426123	3.92411	0.313049	0.302539	1.79177	0.124156	0.157165	2.49948	0.00554117	0.0136047	9.76641	3716502	1457062	987768	4279964	4258899	4533099	3162312	5410200	1798431	7171597	2961726	3932400	21880010	17155000	13275000	15.5	21.1	0	4.6284
P0ABV2	P0ABV2	Biopolymer transport protein ExbD	exbD	sp|P0ABV2|EXBD_ECOLI Biopolymer transport protein ExbD OS=Escherichia coli (strain K12) OX=83333 GN=exbD PE=1 SV=1	5	5	0.081481	0.702034	1.43694	0.125527	0.0874605	1.3444	0.154527	0.122679	1.34481	0.0374148	0.0354575	1.59201	0.0945551	0.123903	1.46294	0.236179	0.262586	1.25541	14502010	24312010	19071000	29783000	25624980	26139990	29085000	31687990	29436990	23571990	32212990	27724990	20881990	24366000	26147010	38.3	15.527	0	7.4617
P29745	P29745	Peptidase T	pepT	sp|P29745|PEPT_ECOLI Peptidase T OS=Escherichia coli (strain K12) OX=83333 GN=pepT PE=1 SV=2	15	15	0.0814869	0.699072	1.08626	0.159965	0.113674	0.903643	0.714178	0.799777	0.989018	0.0489337	0.0451169	1.09681	0.49295	0.672834	1.13854	0.190191	0.216174	0.934315	283989900	296879800	275739800	292979900	321130200	316709800	297720200	321580100	320390200	429000200	238080100	335930000	251999900	262920000	286180100	42.4	44.923	0	105.08
P27305	P27305	Glutamyl-Q tRNA(Asp) synthetase	gluQ	sp|P27305|GLUQ_ECOLI Glutamyl-Q tRNA(Asp) synthetase OS=Escherichia coli (strain K12) OX=83333 GN=gluQ PE=1 SV=6	5	5	0.0821458	0.698992	1.24942	0.0217215	0.0208551	1.24501	0.0212187	0.022507	1.24079	0.0626697	0.0565346	0.691246	0.8625	0.941884	0.957886	0.617418	0.725908	1.09504	6895101	7745197	7512901	7706802	9900402	10256000	3993801	5115500	6486399	11198010	5687103	5537197	10471010	8443696	5958601	15.9	34.867	0.00049334	2.9013
P33643	P33643	Ribosomal large subunit pseudouridine synthase D	rluD	sp|P33643|RLUD_ECOLI Ribosomal large subunit pseudouridine synthase D OS=Escherichia coli (strain K12) OX=83333 GN=rluD PE=1 SV=4	15	15	0.0832461	0.705038	1.04676	0.325597	0.275648	1.07815	0.0106851	0.0136945	1.32421	0.0443642	0.0420062	1.05871	0.231081	0.285806	1.20438	0.0004224	0.00420833	1.22857	117980000	115850100	114660000	117309900	124300100	123270000	123640000	126450000	118950100	151100100	108259900	167370000	138100000	146380000	143760000	63.2	37.121	0	56.03
P76372	P76372	Chain length determinant protein	wzzB	sp|P76372|WZZB_ECOLI Chain length determinant protein OS=Escherichia coli (strain K12) OX=83333 GN=wzzB PE=1 SV=2	18	18	0.0833312	0.702617	1.09324	0.000785433	0.00219178	1.32703	0.00453986	0.00803968	1.44742	1.72453e-05	0	1.4049	0.599562	0.785025	1.07621	0.135654	0.156737	1.09138	365740000	366980000	371760200	431830000	399220100	378179900	504109700	526409800	521390300	344320000	512549800	352429900	386350100	440899800	380790200	53.7	36.454	0	283.89
P36879	P36879	Uncharacterized ABC transporter ATP-binding protein YadG	yadG	sp|P36879|YADG_ECOLI Uncharacterized ABC transporter ATP-binding protein YadG OS=Escherichia coli (strain K12) OX=83333 GN=yadG PE=1 SV=1	12	12	0.0842058	0.704564	1.15932	0.0558799	0.0407473	0.827413	0.283128	0.254865	0.906121	0.0289972	0.0287474	0.855476	0.918632	0.96652	0.992223	0.00169449	0.00967347	1.47286	48640030	55622020	49984980	59348970	64980030	54638010	42688990	45931000	43179980	50007980	56854030	46463020	71135970	76836970	79049960	37.7	34.647	0	40.037
P0AAX8	P0AAX8	Probable L,D-transpeptidase YbiS	ybiS	sp|P0AAX8|YBIS_ECOLI Probable L,D-transpeptidase YbiS OS=Escherichia coli (strain K12) OX=83333 GN=ybiS PE=1 SV=1	12	11	0.0845585	0.70605	1.2311	0.00013725	0	2.19035	0.000111375	0.00130337	2.40812	0.000671112	0.00188785	1.50352	0.01366	0.0260603	1.74838	0.000988241	0.00810738	2.35929	90342030	79744950	87900970	123280000	103300000	92784020	124160000	131060000	132270000	125970000	192350100	139680000	168590000	221829900	222370100	57.2	33.325	0	124.79
P0AC53	P0AC53	Glucose-6-phosphate 1-dehydrogenase;Extracellular death factor	zwf	sp|P0AC53|G6PD_ECOLI Glucose-6-phosphate 1-dehydrogenase OS=Escherichia coli (strain K12) OX=83333 GN=zwf PE=1 SV=1	23	23	0.0849277	0.703473	1.0553	0.000553651	0.00261224	0.64057	0.000105745	0.00131818	0.80149	0.00015344	0.00133333	0.775521	0.120124	0.151365	0.652651	0.377084	0.432405	0.963796	696040300	712020200	681900500	706179700	750850100	749049500	526260200	549630100	544950200	581150300	295420200	547220100	696940000	693489500	625990400	43.8	55.704	0	216.02
P0A7V0	P0A7V0	30S ribosomal protein S2	rpsB	sp|P0A7V0|RS2_ECOLI 30S ribosomal protein S2 OS=Escherichia coli (strain K12) OX=83333 GN=rpsB PE=1 SV=2	19	19	0.0850144	0.701541	1.10778	0.0010172	0.00197531	1.62853	0.00207974	0.00652575	1.43572	0.00338226	0.00619417	1.30552	0.0687894	0.0920666	0.876403	0.0146263	0.0250365	1.48709	1930599000	2046600000	1832100000	2248600000	2019200000	2167401000	2645400000	2398201000	2538899000	1846601000	1624599000	1624301000	2670200000	3446898000	2586501000	82.6	26.743	0	323.31
P0AD33	P0AD33	UPF0381 protein YfcZ	yfcZ	sp|P0AD33|YFCZ_ECOLI UPF0381 protein YfcZ OS=Escherichia coli (strain K12) OX=83333 GN=yfcZ PE=3 SV=1	2	2	0.0856558	0.702922	1.11995	0.00031377	0.000533333	1.67431	0.0107741	0.0136748	1.45224	0.00133063	0.00272109	1.97403	0.388863	0.532497	1.23598	0.00958069	0.0198618	1.54782	59413030	52777000	58445960	63045960	67672030	60339980	97465940	126910100	113969900	66446030	104630100	49772970	74788000	90577990	100320000	27.7	10.318	0	49.055
P0AER0	P0AER0	Glycerol uptake facilitator protein	glpF	sp|P0AER0|GLPF_ECOLI Glycerol uptake facilitator protein OS=Escherichia coli (strain K12) OX=83333 GN=glpF PE=1 SV=1	2	2	0.085915	0.704293	0.682237	0.000239496	0	40.7382	0.28961	0.26043	0.534351	1.63626e-06	0	34.3409	0.559576	0.744748	1.24	0.000349313	0.00464368	0.328425	2518500	1933501	2362999	1309800	2072401	1346099	79445990	77530030	75655980	1464400	3507900	4270802	760510	807500	663760	5.7	29.78	0	6.7815
P0AF67	P0AF67	tRNA threonylcarbamoyladenosine biosynthesis protein TsaE	tsaE	sp|P0AF67|TSAE_ECOLI tRNA threonylcarbamoyladenosine biosynthesis protein TsaE OS=Escherichia coli (strain K12) OX=83333 GN=tsaE PE=1 SV=1	4	4	0.0861946	0.704777	1.14357	0.454445	0.448037	1.05514	0.125367	0.0986068	1.12032	0.066003	0.0576045	0.685089	0.0852827	0.112686	1.16535	0.20474	0.228847	0.884958	47281980	52988990	55296030	55205020	60114010	62433000	28360010	46301020	33925020	62881980	63681030	54752980	40613000	46389000	50964020	36.6	16.853	0	44.041
P23843	P23843	Periplasmic oligopeptide-binding protein	oppA	sp|P23843|OPPA_ECOLI Periplasmic oligopeptide-binding protein OS=Escherichia coli (strain K12) OX=83333 GN=oppA PE=1 SV=2	36	36	0.0864725	0.703661	1.1106	0.0129144	0.0133589	0.836944	0.018573	0.019659	0.804821	0.0653588	0.057342	1.09934	0.0183602	0.0321174	0.453002	0.547624	0.64656	1.05044	2905901000	2979300000	2908199000	3565900000	3121600000	3098500000	2994701000	3327501000	3356898000	1104600000	2001999000	1058401000	2769100000	3555002000	2964499000	70.7	60.898	0	323.31
P00936	P00936	Adenylate cyclase	cyaA	sp|P00936|CYAA_ECOLI Adenylate cyclase OS=Escherichia coli (strain K12) OX=83333 GN=cyaA PE=1 SV=5	6	6	0.0874634	0.711855	1.71998	0.0763944	0.0547322	1.5558	0.84152	0.900598	0.951698	0.690055	0.790976	0.878649	0.782916	0.903182	1.13152	0.538863	0.636125	1.22935	21350000	17935010	30009990	32906000	31492990	56421980	18200000	32323990	13250000	43404000	11904010	32220020	17470000	27651010	44197020	6.7	97.585	0.0096596	1.7395
P12281	P12281	Molybdopterin molybdenumtransferase	moeA	sp|P12281|MOEA_ECOLI Molybdopterin molybdenumtransferase OS=Escherichia coli (strain K12) OX=83333 GN=moeA PE=1 SV=1	9	9	0.0877268	0.712496	0.943206	0.00483225	0.00538907	0.757399	0.0583001	0.0492896	0.798	0.00231993	0.00500831	0.79279	0.390582	0.535707	0.816327	0.548773	0.647771	1.03507	174210100	170089900	173210000	158570100	158800000	171030000	144910000	129310000	136480000	149470000	95205990	196200100	169079900	169849900	198190000	32.1	44.067	0	157.7
P37650	P37650	Cellulose synthase operon protein C	bcsC	sp|P37650|BCSC_ECOLI Cellulose synthase operon protein C OS=Escherichia coli (strain K12) OX=83333 GN=bcsC PE=1 SV=3	7	7	0.0883232	0.713817	0.593043	0.95475	0.977428	0.992777	0.136111	0.105785	1.22699	0.72452	0.823472	1.06671	0.955326	0.977551	0.991027	0.167946	0.191249	1.16531	1396499000	1287300000	1093901000	1062699000	779110300	495390000	1138900000	1821801000	1150401000	1152600000	1607901000	1032800000	1408099000	1629200000	1356500000	6.8	127.72	0	4.7985
P38105	P38105	Starvation-sensing protein RspB	rspB	sp|P38105|RSPB_ECOLI Starvation-sensing protein RspB OS=Escherichia coli (strain K12) OX=83333 GN=rspB PE=2 SV=1	6	6	0.0892376	0.717444	0.351013	0.0041682	0.00482735	0.0260743	0.00067169	0.00359817	0.027043	0.00385983	0.00656293	0.0176202	0.0007773	0.00458824	0.0233844	0.00166259	0.0097732	0.144432	87553950	41175980	90025000	19668000	13858010	51498010	2851201	1720899	361850	1669288	2732988	909692	10216000	9610502	9959794	24.5	36.564	0	51.97
P76234	P76234	Uncharacterized protein YeaE	yeaE	sp|P76234|YEAE_ECOLI Uncharacterized protein YeaE OS=Escherichia coli (strain K12) OX=83333 GN=yeaE PE=4 SV=1	2	2	0.089348	0.716032	0.913529	0.927177	0.962205	0.989938	0.754613	0.830827	1.04188	0.25508	0.236712	1.22998	0.00570101	0.0104861	1.37811	0.524639	0.618306	0.945058	8081896	7791104	8276301	7836797	7340697	6906204	8549703	8406605	13491990	12176000	10009000	11192000	8362199	8095499	6497703	7	30.986	0.0014641	2.6324
P0AF03	P0AF03	Molybdopterin adenylyltransferase	mog	sp|P0AF03|MOG_ECOLI Molybdopterin adenylyltransferase OS=Escherichia coli (strain K12) OX=83333 GN=mog PE=1 SV=1	7	7	0.0894141	0.714646	1.07215	0.415007	0.391896	1.04285	0.181019	0.146683	1.10039	0.00486148	0.00797479	1.2478	0.101425	0.132528	1.42183	0.00188226	0.0101509	1.227	79590020	74121010	77381040	79461960	82201950	86129980	89946010	100150000	98455020	88475990	151410000	97948030	90990030	95876960	96664040	34.9	21.222	0	27.056
P45578	P45578	S-ribosylhomocysteine lyase	luxS	sp|P45578|LUXS_ECOLI S-ribosylhomocysteine lyase OS=Escherichia coli (strain K12) OX=83333 GN=luxS PE=1 SV=3	9	9	0.0895639	0.713475	1.0974	0.000203748	0	2.6366	0.00108155	0.00342857	2.54235	0.00166428	0.00320755	1.47395	0.00267774	0.0039598	3.50828	0.000491586	0.00533333	2.8658	482290000	472110200	427199800	486609900	516160000	511819800	638340200	721649700	676170300	1280800000	2328400000	1408401000	1113299000	1544199000	1331699000	71.3	19.416	0	280.6
P0A8G3	P0A8G3	Uronate isomerase	uxaC	sp|P0A8G3|UXAC_ECOLI Uronate isomerase OS=Escherichia coli (strain K12) OX=83333 GN=uxaC PE=2 SV=1	22	22	0.0898872	0.711766	0.779136	0.000119326	0	0.506382	8.35998e-05	0	0.416231	0.00153548	0.00303226	0.677233	0.00155316	0.00316216	0.331971	0.00038115	0.0043913	0.597028	553219900	634780300	617870100	558489700	389810200	471399800	407510100	387279800	427040000	220010000	152060000	237280100	369090200	362620100	344999800	53.4	53.987	0	168.74
P26612	P26612	Cytoplasmic alpha-amylase	amyA	sp|P26612|AMY2_ECOLI Cytoplasmic alpha-amylase OS=Escherichia coli (strain K12) OX=83333 GN=amyA PE=1 SV=3	11	11	0.090195	0.712265	1.12568	0.00123349	0.00216667	1.80706	0.000401237	0.00254545	1.90992	0.000439401	0.00148315	1.71943	0.00224529	0.00381609	1.79976	0.0121118	0.0211849	1.25791	64072030	56923000	59412010	64775040	65091040	73308040	102690000	110460000	97106970	120330000	112780000	93082940	69783980	78814950	78416980	25.7	56.639	0	21.236
P0A9F6	P0A9F6	Glycine cleavage system transcriptional activator	gcvA	sp|P0A9F6|GCVA_ECOLI Glycine cleavage system transcriptional activator OS=Escherichia coli (strain K12) OX=83333 GN=gcvA PE=1 SV=1	7	7	0.0910455	0.715411	1.06142	0.00902025	0.00937583	1.30721	0.0493323	0.0439888	1.29952	0.44587	0.481289	1.03929	0.018816	0.0320714	1.2991	0.0086285	0.0195238	1.33836	21736000	20305000	21950010	22957000	22138010	22793990	23810000	20874010	21880990	28369010	24538990	30510020	28466020	25945010	31445020	26.9	34.401	0	11.775
P42616	P42616	Protein YqjC	yqjC	sp|P42616|YQJC_ECOLI Protein YqjC OS=Escherichia coli (strain K12) OX=83333 GN=yqjC PE=1 SV=3	4	4	0.0913566	0.714147	0.740688	0.0117304	0.0121958	2.12236	0.0333191	0.0314809	1.64838	0.145083	0.124431	1.28206	0.130049	0.162297	1.30039	0.241012	0.269132	1.22625	114520000	73067980	101140000	68921020	68265010	73095030	120400000	128379900	115380000	123770100	115690000	129970000	131719900	108930000	108760000	15.6	13.906	0	17.863
P45579	P45579	Uncharacterized oxidoreductase YbdH	ybdH	sp|P45579|HCXA_ECOLI Hydroxycarboxylate dehydrogenase A OS=Escherichia coli (strain K12) OX=83333 GN=hcxA PE=1 SV=2	8	8	0.0915909	0.713092	0.87374	0.0620251	0.0443805	0.833161	0.000766982	0.00381435	0.54587	0.246156	0.227332	0.912947	0.281392	0.35229	0.853165	0.0259811	0.0389736	0.633333	85155000	86137940	98808000	84660970	76019030	75116980	84238040	87494010	74824980	89253040	60701960	83074990	46560000	55514980	71231020	34.8	39.091	0	70.107
P0AB91	P0AB91	Phospho-2-dehydro-3-deoxyheptonate aldolase, Phe-sensitive	aroG	sp|P0AB91|AROG_ECOLI Phospho-2-dehydro-3-deoxyheptonate aldolase, Phe-sensitive OS=Escherichia coli (strain K12) OX=83333 GN=aroG PE=1 SV=1	10	10	0.0922448	0.717579	1.06405	0.0148687	0.0150396	1.48194	0.456749	0.479513	0.922904	1.60699e-05	0	2.00041	0.341446	0.449676	0.815563	0.0797523	0.0951697	0.875519	268390000	294670100	275710000	295879800	300109800	295830200	563859600	557059800	555699700	262070100	157340100	286860000	235829900	269859800	229940000	42.9	38.009	0	146.64
P0A9K7	P0A9K7	Phosphate-specific transport system accessory protein PhoU	phoU	sp|P0A9K7|PHOU_ECOLI Phosphate-specific transport system accessory protein PhoU OS=Escherichia coli (strain K12) OX=83333 GN=phoU PE=1 SV=1	12	12	0.0923061	0.715313	0.89759	0.250269	0.192577	1.09846	0.0162784	0.0178314	1.32015	0.00231053	0.00503621	0.74488	0.00128718	0.00354545	0.688369	0.0282325	0.0424085	1.23738	136089900	121190000	123020000	106410000	117579900	117269900	90457960	94971030	97608950	91744990	83093990	86812010	144780000	172730000	153709900	51.5	27.417	0	323.31
P16703	P16703	Cysteine synthase B	cysM	sp|P16703|CYSM_ECOLI Cysteine synthase B OS=Escherichia coli (strain K12) OX=83333 GN=cysM PE=1 SV=1	14	14	0.0931263	0.722221	1.04102	0.00525561	0.00561137	0.820849	0.00248347	0.00703275	0.873038	4.21536e-05	0	0.501478	4.00177e-05	0	0.193543	0.00169842	0.00957576	1.33171	185770000	195190000	192689900	195640100	198470100	203010000	91983040	102209900	93722970	34405020	43622020	33752020	248700000	272860100	243169900	60.7	32.664	0	193.52
P0AA91	P0AA91	Uncharacterized lipoprotein YeaY	yeaY	sp|P0AA91|YEAY_ECOLI Uncharacterized lipoprotein YeaY OS=Escherichia coli (strain K12) OX=83333 GN=yeaY PE=3 SV=1	12	12	0.0939845	0.724636	1.12019	0.335719	0.286871	0.913957	0.00494407	0.00857253	1.52793	0.0169012	0.018537	0.771848	0.506422	0.686642	0.733226	0.910815	0.944339	1.0109	336889800	386709800	371669800	434610100	391609800	399899900	263409900	271580000	311239800	175090100	623650200	174800000	333390000	432659800	346780100	56	20.921	0	180.21
P64564	P64564	Uncharacterized protein YggT	yggT	sp|P64564|YGGT_ECOLI Uncharacterized protein YggT OS=Escherichia coli (strain K12) OX=83333 GN=yggT PE=3 SV=1	1	1	0.0942518	0.722823	0.701453	0.000969938	0.00203175	0.264056	0.00104718	0.00350178	0.227637	0.0013118	0.00274914	0.336364	0.0428119	0.0580555	0.465632	0.0144765	0.0251329	0.312645	25249010	21396000	33116010	15419000	21853010	18325000	9044900	8020596	9384994	10363010	9130105	19088990	10705000	4952198	10313000	5.3	21.167	0.0005102	3.7675
Q46871	Q46871	NADPH-dependent ferric-chelate reductase	yqjH	sp|Q46871|YQJH_ECOLI NADPH-dependent ferric-chelate reductase OS=Escherichia coli (strain K12) OX=83333 GN=yqjH PE=1 SV=1	7	7	0.0949762	0.725429	1.21032	0.527758	0.568679	0.920148	0.187888	0.153665	1.21837	0.0020787	0.00428818	1.53676	0.0052192	0.0102754	1.88251	0.00758344	0.0166177	0.701794	38417980	35582990	31996010	47007980	37248980	44287970	51113010	56156980	55304000	58261960	80989020	61841030	23738990	23437000	27173010	27.6	28.871	0	23.425
P60782	P60782	Probable glycerol-3-phosphate acyltransferase	plsY	sp|P60782|PLSY_ECOLI Probable glycerol-3-phosphate acyltransferase OS=Escherichia coli (strain K12) OX=83333 GN=plsY PE=1 SV=1	1	1	0.0950974	0.72361	0.353753	0.0742959	0.0531272	0.429245	0.0877382	0.0710388	0.245054	0.398574	0.414896	0.871462	0.245691	0.304818	0.518374	0.105041	0.123763	0.821685	17424010	17234990	13181990	2902066	13867010	4354608	14512000	11092010	16276010	11513000	3210700	14917000	12419000	13266000	13329990	6.8	22.193	0	4.6293
P26648	P26648	Cell division protein FtsP	ftsP	sp|P26648|FTSP_ECOLI Cell division protein FtsP OS=Escherichia coli (strain K12) OX=83333 GN=ftsP PE=1 SV=2	14	14	0.0952986	0.721716	0.870015	0.000704432	0.00232727	0.774269	0.00327952	0.00747032	0.634316	0.0403527	0.039351	0.796791	0.00944566	0.0175367	1.19251	0.229268	0.255352	1.09342	102310000	108540000	111740000	90544950	104730000	86170980	95521940	74867040	87771950	126900000	134890000	122930100	129330000	118280000	106040100	37.4	51.858	0	23.013
P00350	P00350	6-phosphogluconate dehydrogenase, decarboxylating	gnd	sp|P00350|6PGD_ECOLI 6-phosphogluconate dehydrogenase, decarboxylating OS=Escherichia coli (strain K12) OX=83333 GN=gnd PE=1 SV=2	34	34	0.0955478	0.719911	1.05505	0.00118387	0.00220339	1.32779	0.00896065	0.0114667	1.12162	9.13691e-05	0.00164706	1.75833	0.416387	0.577545	0.906732	0.00378206	0.0139433	1.31991	1663401000	1738599000	1775899000	1874900000	1780300000	1807001000	2899699000	3000301000	3209201000	1678101000	1269300000	1797501000	2101001000	2415400000	2327199000	78.6	51.481	0	323.31
P34209	P34209	Protein YdcF	ydcF	sp|P34209|YDCF_ECOLI Protein YdcF OS=Escherichia coli (strain K12) OX=83333 GN=ydcF PE=1 SV=3	10	10	0.0961103	0.72243	0.8882	0.809232	0.881079	1.01562	0.359763	0.339242	1.05741	0.00406125	0.00702242	0.713594	0.493767	0.672727	1.04309	0.248452	0.277954	1.08603	325080200	326180100	281009900	288089900	265390100	273079900	213699900	216309900	234230000	337019900	326480000	307340200	313599900	353700000	344100200	44.7	29.705	0	174.82
P37773	P37773	UDP-N-acetylmuramate--L-alanyl-gamma-D-glutamyl-meso-2,6-diaminoheptandioate ligase	mpl	sp|P37773|MPL_ECOLI UDP-N-acetylmuramate--L-alanyl-gamma-D-glutamyl-meso-2,6-diaminoheptandioate ligase OS=Escherichia coli (strain K12) OX=83333 GN=mpl PE=1 SV=3	9	9	0.0962007	0.719764	0.907221	0.00109474	0.0022807	0.699896	0.0300354	0.0290573	0.723944	0.0222529	0.0240759	0.760666	0.607879	0.791472	0.883064	0.0637219	0.081426	0.784648	33464010	31586020	35472000	29154990	29828000	32192980	24621010	28999990	23112010	41299020	19461000	32124020	29148010	21988000	28261010	32.2	49.874	0	10.732
P13482	P13482	Periplasmic trehalase	treA	sp|P13482|TREA_ECOLI Periplasmic trehalase OS=Escherichia coli (strain K12) OX=83333 GN=treA PE=1 SV=1	27	27	0.0962569	0.717118	1.04664	0.00630462	0.00666066	1.28302	0.000332856	0.00186667	1.60957	0.128345	0.107848	0.955544	0.178584	0.218002	1.36363	0.0133604	0.023032	1.57305	753359800	757840100	718159600	758950100	790499500	783560400	688060300	714040300	728120400	900879800	1467999000	786129600	958180400	1374401000	1211900000	66.9	63.636	0	323.31
P0ABF1	P0ABF1	Poly(A) polymerase I	pcnB	sp|P0ABF1|PCNB_ECOLI Poly(A) polymerase I OS=Escherichia coli (strain K12) OX=83333 GN=pcnB PE=1 SV=2	15	15	0.0969489	0.721641	1.09905	0.028413	0.0253269	1.23593	0.00108212	0.00341667	1.34012	0.0289976	0.0287143	1.15705	0.373272	0.50605	1.2349	0.375799	0.431006	1.09096	38170000	39542020	41853020	46087020	40992010	44390030	48062990	43029020	47314000	64452980	32600980	56614980	43031980	50416970	37806990	31.8	53.87	0	41.536
P25526	P25526	Succinate-semialdehyde dehydrogenase [NADP(+)] GabD	gabD	sp|P25526|GABD_ECOLI Succinate-semialdehyde dehydrogenase [NADP(+)] GabD OS=Escherichia coli (strain K12) OX=83333 GN=gabD PE=1 SV=1	29	29	0.0971319	0.719985	0.900276	0.000155034	0	0.590922	0.000319299	0.00145	0.541136	0.17657	0.154778	1.05583	0.00846724	0.0167081	0.705259	0.00274742	0.0139918	0.686086	1757801000	1751199000	1794599000	1746600000	1487300000	1551700000	1759500000	1879400000	1966301000	1347500000	1079900000	1331699000	1090600000	1323501000	1236000000	72.8	51.719	0	323.31
P52094	P52094	Histidine transport system permease protein HisQ	hisQ	sp|P52094|HISQ_ECOLI Histidine transport system permease protein HisQ OS=Escherichia coli (strain K12) OX=83333 GN=hisQ PE=1 SV=2	5	5	0.097237	0.718095	0.855236	0.00752599	0.00793249	0.619064	0.126699	0.0987704	0.68636	0.04934	0.0453387	0.68489	0.0855836	0.112865	1.3131	0.103992	0.122795	0.838676	9088196	9386805	11034000	9088496	7992196	8106402	7291802	7851595	5282001	10517000	14850000	13646000	8146002	7461300	9135901	28.5	24.649	0	7.429
P64451	P64451	Uncharacterized lipoprotein YdcL	ydcL	sp|P64451|YDCL_ECOLI Uncharacterized lipoprotein YdcL OS=Escherichia coli (strain K12) OX=83333 GN=ydcL PE=3 SV=1	20	20	0.0972554	0.715768	1.16547	0.000333103	0.000517413	2.18165	0.000974565	0.00357818	2.07929	0.000775254	0.00237555	1.89185	0.673867	0.837692	1.20156	0.00317287	0.0140916	1.84937	2436001000	2450900000	2178700000	2990401000	2444298000	2817200000	4133999000	4986307000	4272800000	2030500000	6304596000	1762700000	3908598000	5191603000	4054599000	78.8	24.427	0	323.31
P0AA84	P0AA84	Cardiolipin synthase B	clsB	sp|P0AA84|CLSB_ECOLI Cardiolipin synthase B OS=Escherichia coli (strain K12) OX=83333 GN=clsB PE=1 SV=1	4	4	0.0976418	0.714498	0.715123	0.167773	0.119009	0.687576	0.00017883	0.000991453	0.722842	0.983248	0.991639	1.00098	0.238467	0.296743	0.56935	0.903837	0.940362	1.03874	6436299	6196003	6624902	4228898	6187604	3692499	6944301	6202699	6151600	5169700	1625100	5803902	11972000	4691399	5272003	9.7	47.633	0	4.7208
P0A6L0	P0A6L0	Deoxyribose-phosphate aldolase	deoC	sp|P0A6L0|DEOC_ECOLI Deoxyribose-phosphate aldolase OS=Escherichia coli (strain K12) OX=83333 GN=deoC PE=1 SV=1	16	16	0.0978599	0.713223	1.15931	0.00106339	0.00191045	1.49187	0.233913	0.198599	1.13635	5.24915e-05	0.0025	2.21986	0.375585	0.510097	0.915723	0.0497843	0.0680388	1.29349	442999700	484449900	426209800	535250100	468320000	568559900	1032100000	1009900000	959960600	374959800	483479900	387440100	661699700	602300000	496700300	65.6	27.733	0	296.88
P27242	P27242	Lipopolysaccharide 1,2-N-acetylglucosaminetransferase	waaU	sp|P27242|WAAU_ECOLI Lipopolysaccharide 1,2-N-acetylglucosaminetransferase OS=Escherichia coli (strain K12) OX=83333 GN=waaU PE=4 SV=2	3	3	0.0982371	0.713391	0.871716	0.0671307	0.0486394	0.7932	0.00927471	0.0119878	0.802419	0.0284242	0.0284144	0.621555	0.283823	0.355334	1.26687	0.227612	0.25355	0.875663	2411010	2309200	2061400	1806000	2086800	2017199	1561100	1074600	1642801	2565899	4101017	2217601	1823201	1820901	2321199	10.1	41.729	0.00050302	3.3544
P0ACV4	P0ACV4	Lipopolysaccharide assembly protein A	lapA	sp|P0ACV4|LAPA_ECOLI Lipopolysaccharide assembly protein A OS=Escherichia coli (strain K12) OX=83333 GN=lapA PE=1 SV=1	4	4	0.099052	0.717543	0.911963	0.196604	0.142904	1.08374	0.834083	0.895133	0.979772	0.917264	0.958566	0.989792	0.262991	0.327643	0.887995	0.226649	0.252323	0.915285	60386990	55299030	60527020	54337980	50407980	55967970	64898040	48833000	61843970	57362000	43868980	56241970	59866010	51306030	50457980	22.5	11.351	0	24.235
P77695;P0AC92	P77695	Protein GnsB	gnsB	sp|P77695|GNSB_ECOLI Protein GnsB OS=Escherichia coli (strain K12) OX=83333 GN=gnsB PE=3 SV=2	8	8	0.0990768	0.714989	1.12016	0.00478666	0.00539775	1.25865	0.33145	0.305073	1.12284	0.0065037	0.00879693	1.23431	0.0760151	0.103055	0.648104	0.757376	0.840245	1.0181	241889900	260370000	278189900	287589900	275949900	310300200	319110100	321929800	320719900	152730100	237610000	131430000	247770000	265779900	280770000	75.4	6.5476	0	71.87
P08142	P08142	Acetolactate synthase isozyme 1 large subunit	ilvB	sp|P08142|ILVB_ECOLI Acetolactate synthase isozyme 1 large subunit OS=Escherichia coli (strain K12) OX=83333 GN=ilvB PE=1 SV=1	20	20	0.0996473	0.715092	0.883299	1.12941e-05	0	0.130002	4.89967e-05	0	0.153972	1.15819e-05	0	0.198041	0.00106695	0.00393277	0.0641455	0.000496136	0.00523077	0.531956	500540100	598930000	583560100	482020300	491880200	508510200	115940000	107940000	108580000	47782000	18954000	50983970	299400100	284349800	309329800	50.4	60.44	0	323.31
P22256	P22256	4-aminobutyrate aminotransferase GabT	gabT	sp|P22256|GABT_ECOLI 4-aminobutyrate aminotransferase GabT OS=Escherichia coli (strain K12) OX=83333 GN=gabT PE=1 SV=1	21	21	0.0999724	0.714191	0.930539	0.00774721	0.00819499	0.720132	1.44593e-05	0	0.51456	0.00109906	0.00298507	1.47266	0.630879	0.807467	0.942156	0.000284143	0.00511392	0.732244	1069600000	1145800000	1147800000	1007200000	1093199000	1029401000	1756100000	1532300000	1669601000	1099000000	854380400	1252900000	803110000	821440400	837170000	56.1	45.774	0	315.99
P77754	P77754	Spheroplast protein Y	spy	sp|P77754|SPY_ECOLI Periplasmic chaperone Spy OS=Escherichia coli (strain K12) OX=83333 GN=spy PE=1 SV=1	13	13	0.100212	0.714352	1.20655	0.0031907	0.00472243	1.89069	0.000921088	0.00374144	4.41781	0.000927089	0.00322581	1.70213	0.000267892	0.00123077	18.9925	0.0322021	0.0473078	1.55173	62861030	75758970	68198980	95271970	78294950	76476980	114350000	123560000	113360000	1024800000	2098400000	1034700000	83075980	122440000	119300000	55.9	18.199	0	92.834
P75919	P75919	Cardiolipin synthase C	clsC	sp|P75919|CLSC_ECOLI Cardiolipin synthase C OS=Escherichia coli (strain K12) OX=83333 GN=clsC PE=1 SV=2	8	8	0.101354	0.721642	0.293628	0.51109	0.542244	1.5555	0.88378	0.928342	0.900527	0.581512	0.672677	0.701688	0.509315	0.690622	1.55888	0.905726	0.941359	0.929371	40455980	8502001	6452504	3318500	3780599	4478398	12313000	8398495	7414797	20580990	13737990	29735980	11548990	10435010	14783010	17.5	53.665	0	7.1306
P0ACI0	P0ACI0	Right origin-binding protein	rob	sp|P0ACI0|ROB_ECOLI Right origin-binding protein OS=Escherichia coli (strain K12) OX=83333 GN=rob PE=1 SV=1	10	10	0.10156	0.719524	1.1119	0.864616	0.923944	1.00995	0.427802	0.437988	0.920944	0.114315	0.0967602	0.901314	0.942525	0.974322	1.01419	0.806792	0.874839	0.981057	603580200	687760200	670590100	705960300	771110100	702959600	555279700	621610400	590510000	827799600	464490200	755249600	584969800	624150000	719929700	34.3	33.144	0	210.64
P69795	P69795	N,N-diacetylchitobiose-specific phosphotransferase enzyme IIB component	chbB	sp|P69795|PTQB_ECOLI PTS system N,N-diacetylchitobiose-specific EIIB component OS=Escherichia coli (strain K12) OX=83333 GN=chbB PE=1 SV=1	4	4	0.101741	0.719526	1.1674	0.78524	0.863358	0.956747	0.143307	0.112011	1.27203	0.563379	0.649709	0.964447	0.39082	0.535485	0.731698	0.164269	0.186547	1.3062	8110100	7124798	7923202	10143000	8285804	8666798	7713601	6842404	7781603	3988598	10742010	4185901	7651603	12931000	10312000	45.3	11.426	0	8.6126
Q47690	Q47690	Homocysteine S-methyltransferase	mmuM	sp|Q47690|MMUM_ECOLI Homocysteine S-methyltransferase OS=Escherichia coli (strain K12) OX=83333 GN=mmuM PE=1 SV=2	5	5	0.102539	0.722583	0.72506	0.00216062	0.00307359	0.511709	0.00283205	0.00730097	0.523932	0.15112	0.127988	0.743737	0.01724	0.0302792	0.57531	0.00314336	0.0141456	0.504362	29788000	40838980	33719020	31199000	20508010	24437010	27041990	31677020	19699990	19809990	16496000	23902000	19391990	16051990	16907010	19.4	33.422	0	5.8575
P37645	P37645	Uncharacterized protein YhjG	yhjG	sp|P37645|YHJG_ECOLI AsmA family protein YhjG OS=Escherichia coli (strain K12) OX=83333 GN=yhjG PE=3 SV=3	24	24	0.102611	0.720484	1.13465	0.000746855	0.00226148	1.64338	0.00484659	0.00833398	1.60641	0.88233	0.93748	0.990507	0.228618	0.28261	1.10785	0.0021608	0.0118584	1.56277	143090000	153390000	170369900	167010000	186460000	175410000	157430000	144049900	160240000	178190100	155420000	183590000	226959900	242669900	259129900	42.7	74.457	0	91.25
P0AE60	P0AE60	Cell division activator CedA	cedA	sp|P0AE60|CEDA_ECOLI Cell division activator CedA OS=Escherichia coli (strain K12) OX=83333 GN=cedA PE=1 SV=2	2	2	0.102842	0.720676	0.467633	0.0143505	0.0145918	2.549	0.0390419	0.0363416	2.23663	0.363988	0.369141	1.55136	0.341317	0.44975	0.578102	0.019754	0.0310479	2.73196	4849614	5607092	7922500	4739326	3048772	1524686	14896990	12964000	4164896	2974468	1627341	8598696	10660990	18160010	22689000	28.8	9.3767	0.00051177	3.8012
P0AFG6	P0AFG6	Dihydrolipoyllysine-residue succinyltransferase component of 2-oxoglutarate dehydrogenase complex	sucB	sp|P0AFG6|ODO2_ECOLI Dihydrolipoyllysine-residue succinyltransferase component of 2-oxoglutarate dehydrogenase complex OS=Escherichia coli (strain K12) OX=83333 GN=sucB PE=1 SV=2	24	24	0.102981	0.718955	1.08806	0.0481472	0.037095	0.875675	0.439855	0.455888	0.940853	0.294936	0.282459	1.07718	0.157503	0.194616	0.821907	0.00707414	0.015125	0.750659	2154801000	2414499000	2318600000	2386701000	2557198000	2545999000	2678201000	2241799000	2511199000	2256300000	1553601000	1910699000	1721199000	1863200000	1591100000	57	44.011	0	323.31
P0A9G8	P0A9G8	Transcriptional regulator ModE	modE	sp|P0A9G8|MODE_ECOLI DNA-binding transcriptional dual regulator ModE OS=Escherichia coli (strain K12) OX=83333 GN=modE PE=1 SV=1	9	9	0.103024	0.716493	0.981956	0.00143801	0.00273902	1.27657	0.10741	0.0844383	1.08621	0.000356171	0.00167089	1.42024	0.00915281	0.0170326	1.33468	0.00401739	0.013512	1.14462	65277010	64451020	64806980	64673980	63102000	63258030	90990990	87900970	97658010	88913960	77024010	94656020	71000950	76317000	75458990	46.2	28.281	0	44.756
P0A937	P0A937	Outer membrane protein assembly factor BamE	bamE	sp|P0A937|BAME_ECOLI Outer membrane protein assembly factor BamE OS=Escherichia coli (strain K12) OX=83333 GN=bamE PE=1 SV=1	2	2	0.103214	0.716014	1.47421	0.00626032	0.0066908	2.88655	0.000559758	0.00333668	3.60725	6.78241e-05	0.002	2.86637	0.178772	0.217875	3.56463	0.287223	0.320716	1.9715	537080	567920	583670	1168101	625380	780810	1529400	1519101	1804599	864350	9530397	978890	928070	3119402	471230	48.7	12.302	0	111.89
P0A6A8	P0A6A8	Acyl carrier protein	acpP	sp|P0A6A8|ACP_ECOLI Acyl carrier protein OS=Escherichia coli (strain K12) OX=83333 GN=acpP PE=1 SV=2	4	4	0.103688	0.719347	2.27482	0.196064	0.142307	1.82061	0.0491082	0.044041	2.91553	0.941193	0.973521	1.03124	0.145564	0.17946	2.63025	0.186143	0.211802	1.90489	1312501000	1098100000	394210200	1843700000	2314399000	1567401000	820150200	1059200000	717260100	1670599000	4637704000	1334399000	1165900000	1802801000	1868400000	42.3	8.6394	0	321.73
P05020	P05020	Dihydroorotase	pyrC	sp|P05020|PYRC_ECOLI Dihydroorotase OS=Escherichia coli (strain K12) OX=83333 GN=pyrC PE=1 SV=2	16	16	0.104533	0.722007	1.09302	7.63576e-05	0	1.47042	5.19645e-05	0	1.4005	0.643012	0.745225	1.0187	0.000876391	0.00441509	1.65139	2.78615e-05	0	1.5436	333089900	352310200	350789900	397940100	350180100	385749900	358420100	330269900	367630200	513910200	613169800	588320300	524409900	541339800	533330200	58.6	38.827	0	210.95
P77499	P77499	Probable ATP-dependent transporter SufC	sufC	sp|P77499|SUFC_ECOLI Probable ATP-dependent transporter SufC OS=Escherichia coli (strain K12) OX=83333 GN=sufC PE=1 SV=1	14	14	0.10667	0.739716	1.11772	0.00814151	0.00857534	1.29844	0.0431026	0.0394485	1.18676	0.0015179	0.00306189	1.45512	0.0105561	0.0190056	1.43097	0.0869912	0.103558	1.13278	208869900	242750100	228550000	250880000	240740100	267919900	316219900	332130000	339950100	299659800	369169800	306940200	257190000	271339900	241370200	56	27.582	0	103.47
P0A6L4	P0A6L4	N-acetylneuraminate lyase	nanA	sp|P0A6L4|NANA_ECOLI N-acetylneuraminate lyase OS=Escherichia coli (strain K12) OX=83333 GN=nanA PE=1 SV=2	10	10	0.107047	0.73938	0.884115	7.76975e-05	0	0.455463	2.9122e-05	0	0.441727	1.51681e-05	0	2.61104	0.00304444	0.00515888	0.330062	0.00112597	0.00972152	0.459959	73526040	67587980	72653010	69117020	57461960	62823970	182550000	196410000	179250100	19661010	33077990	19962010	27611010	37313010	34102010	46.5	32.593	0	34.641
P37759	P37759	dTDP-glucose 4,6-dehydratase 1	rfbB	sp|P37759|RMLB1_ECOLI dTDP-glucose 4,6-dehydratase 1 OS=Escherichia coli (strain K12) OX=83333 GN=rfbB PE=3 SV=2	19	18	0.107207	0.737732	0.850558	0.098003	0.0691873	0.869508	0.0332532	0.0315459	0.750854	0.994802	0.996389	1.00047	0.984785	0.989755	0.997135	0.0897068	0.106385	0.841134	402650100	460269800	481810000	417870100	343489800	382800200	413430000	477540200	452919900	527359900	344509900	487269800	353759900	357339900	420360200	54.6	40.558	0	148.94
P19636	P19636	Ethanolamine ammonia-lyase light chain	eutC	sp|P19636|EUTC_ECOLI Ethanolamine ammonia-lyase light chain OS=Escherichia coli (strain K12) OX=83333 GN=eutC PE=1 SV=2	7	7	0.10739	0.736936	0.855254	0.306384	0.253522	0.901849	0.0044689	0.00784064	0.668531	0.0792481	0.067297	0.832573	0.554747	0.740469	0.894077	0.79754	0.86839	0.969533	30616000	32438980	38507980	29407000	27104980	30015990	30017020	27845000	26407000	29214990	23226010	40282000	27458990	34329000	36975010	24.1	31.781	0	16.84
P0A6I9	P0A6I9	Dephospho-CoA kinase	coaE	sp|P0A6I9|COAE_ECOLI Dephospho-CoA kinase OS=Escherichia coli (strain K12) OX=83333 GN=coaE PE=1 SV=1	8	8	0.107904	0.7386	1.09491	0.00183573	0.00248244	1.37919	0.0113602	0.0137151	1.47161	0.79644	0.881287	0.984085	0.2103	0.256763	0.647256	0.00644167	0.0151608	1.29971	66601960	61062000	57830980	65532000	68658010	68613000	63887040	62666030	55984990	23630990	64008020	42162980	78244970	84983030	77654980	57.8	22.621	0	57.581
P36767	P36767	Recombination-associated protein RdgC	rdgC	sp|P36767|RDGC_ECOLI Recombination-associated protein RdgC OS=Escherichia coli (strain K12) OX=83333 GN=rdgC PE=1 SV=1	11	11	0.107996	0.737714	1.10215	0.0773242	0.0553504	1.14692	0.119999	0.093796	1.1029	0.50352	0.565056	0.969755	0.541315	0.726631	0.918995	0.00826421	0.018764	1.26378	138710000	147230100	155980000	172099900	161230000	153699900	136480000	143300000	148540000	154900000	105990000	150589900	177560100	182150000	198799900	38.3	33.993	0	110.8
P69811	P69811	Multiphosphoryl transfer protein;Phosphocarrier protein HPr;Fructose-specific phosphotransferase enzyme IIA component	fruB	sp|P69811|PTFAH_ECOLI Multiphosphoryl transfer protein OS=Escherichia coli (strain K12) OX=83333 GN=fruB PE=1 SV=1	14	14	0.108417	0.737841	1.1453	0.00807261	0.00862259	1.36065	0.114348	0.0898699	1.11687	0.00995032	0.0119473	1.22669	0.0734968	0.0982873	0.800187	0.0244357	0.0367115	1.19024	123960000	126859900	143000000	165030000	145710000	140489900	160330100	160550000	161259900	110209900	89444990	116880000	154379900	151000000	162660000	52.1	39.647	0	114.14
P67826	P67826	Copper homeostasis protein CutC	cutC	sp|P67826|CUTC_ECOLI Copper homeostasis protein CutC OS=Escherichia coli (strain K12) OX=83333 GN=cutC PE=3 SV=1	7	7	0.108697	0.73699	0.818248	0.20833	0.152537	0.876591	0.365619	0.347497	0.853011	0.0244097	0.0259361	0.826553	0.129696	0.16207	0.761611	0.433976	0.506983	0.947942	27220000	32044990	29819010	27813990	24703990	20737990	25138000	23230990	25151000	29069000	18329990	21565000	26006000	28748990	29633980	37.9	26.761	0	17.667
P04993	P04993	RecBCD enzyme subunit RecD	recD	sp|P04993|RECD_ECOLI RecBCD enzyme subunit RecD OS=Escherichia coli (strain K12) OX=83333 GN=recD PE=1 SV=2	7	7	0.10907	0.736987	1.49745	0.0217697	0.0208123	2.05884	0.0480616	0.0435518	1.77663	0.017305	0.0194005	2.04341	0.0802982	0.107538	2.69141	0.0731583	0.0884842	1.67258	10384000	7287697	5581900	9816596	12917010	11186010	15980000	14420010	15640990	33077990	9454497	26332990	10720000	15668990	11767000	13.5	66.902	0	13.572
P06968	P06968	Deoxyuridine 5-triphosphate nucleotidohydrolase	dut	sp|P06968|DUT_ECOLI Deoxyuridine 5-triphosphate nucleotidohydrolase OS=Escherichia coli (strain K12) OX=83333 GN=dut PE=1 SV=2	3	3	0.109491	0.737128	1.26635	0.0307207	0.0263932	1.26415	0.0135251	0.0156441	1.62831	0.00059171	0.00205076	1.91305	0.0490629	0.0675472	3.05529	0.164495	0.186821	1.32075	27737020	34728020	30373980	44639970	32497020	40957990	58540000	59863000	58453000	63718000	207119900	63229020	33685020	54746980	36552010	26.3	16.286	0	87.994
P22333	P22333	Adenosine deaminase	add	sp|P22333|ADD_ECOLI Adenosine deaminase OS=Escherichia coli (strain K12) OX=83333 GN=add PE=3 SV=2	15	15	0.109526	0.735059	1.0933	0.000218604	0	1.34695	0.462779	0.488147	1.07026	0.990743	0.996512	0.99953	0.638836	0.814242	0.945046	0.0438084	0.0618931	1.11706	130670100	135880000	132910000	146920000	134780000	155739900	141849900	125060000	132840100	151170000	127859900	103050000	159890000	144259900	142610000	53.8	36.397	0	295.09
P77300	P77300	Uncharacterized HTH-type transcriptional regulator YagI	yagI	sp|P77300|XYNR_ECOLI HTH-type transcriptional regulator XynR OS=Escherichia coli (strain K12) OX=83333 GN=xynR PE=1 SV=1	8	8	0.109713	0.734293	1.20416	0.0091343	0.00927727	1.57992	0.00480561	0.00835019	1.58847	0.0324363	0.0313826	1.34951	0.0148058	0.0280392	1.39733	0.0284423	0.0428157	1.49127	11156000	14087010	14301010	17123000	14927000	15353000	16151000	18054010	18943000	18470010	17822000	18627990	16483000	22119990	20442990	36.9	27.838	0	22.025
P37623	P37623	4-phosphopantetheinyl transferase AcpT	acpT	sp|P37623|ACPT_ECOLI 4-phosphopantetheinyl transferase AcpT OS=Escherichia coli (strain K12) OX=83333 GN=acpT PE=3 SV=1	1	1	0.109732	0.732299	0.746114	0.342216	0.295253	1.23224	0.246165	0.211675	1.3948	0.196463	0.176074	0.735574	0.623998	0.80504	1.18416	0.700352	0.799949	0.923763	2445100	2095899	2626599	1380899	2066399	1959300	2351301	1840101	1238200	1575199	4579482	3098411	2719799	1537201	2537900	7.2	21.768	0.0092208	1.7651
P27127	P27127	Lipopolysaccharide 1,6-galactosyltransferase	rfaB	sp|P27127|RFAB_ECOLI Lipopolysaccharide 1,6-galactosyltransferase OS=Escherichia coli (strain K12) OX=83333 GN=rfaB PE=3 SV=2	5	5	0.110161	0.734356	0.829495	0.560288	0.622797	0.951649	0.343566	0.320167	1.16573	0.125591	0.105994	0.696921	0.00141081	0.00331915	0.183361	0.226881	0.252484	1.12983	6862797	7726103	6386298	6399804	5023700	6011203	4885800	3555544	6598103	1463885	848976	1679697	8892596	7717395	7116297	15.6	40.825	0	4.8515
P64503	P64503	Uncharacterized protein YebV	yebV	sp|P64503|YEBV_ECOLI Uncharacterized protein YebV OS=Escherichia coli (strain K12) OX=83333 GN=yebV PE=1 SV=1	3	3	0.110741	0.736465	1.16726	0.0373653	0.0302956	1.20044	0.0111517	0.0136477	2.23117	0.000117982	0.00150538	0.547593	0.626936	0.804127	0.89248	0.813354	0.880655	1.04213	110720100	121710100	115280000	128730000	123520000	155380000	67151020	62490970	60787010	81534030	158660000	85368040	90828020	121899900	158800000	41	8.7527	0	88.906
P0A6S0	P0A6S0	Flagellar L-ring protein	flgH	sp|P0A6S0|FLGH_ECOLI Flagellar L-ring protein OS=Escherichia coli (strain K12) OX=83333 GN=flgH PE=3 SV=1	2	2	0.111952	0.739177	2.49596	0.771231	0.854289	0.837533	0.636319	0.722188	1.33401	0.720644	0.82037	0.822433	0.925473	0.969941	1.05366	0.57573	0.679888	0.756129	980140	2207042	4599189	5757703	5607300	4791701	1132408	2636988	1853405	3249294	1317180	2719253	1324100	1912299	1698601	12.5	24.615	0	4.9607
P08622	P08622	Chaperone protein DnaJ	dnaJ	sp|P08622|DNAJ_ECOLI Chaperone protein DnaJ OS=Escherichia coli (strain K12) OX=83333 GN=dnaJ PE=1 SV=3	17	17	0.112028	0.737256	1.14803	0.00994944	0.0103003	1.45924	0.00960618	0.0125262	1.42695	0.70867	0.809787	0.972344	0.0238696	0.0383347	0.620681	0.130085	0.151101	1.19701	437409900	540720300	526690300	586479800	572940100	560939800	467560300	502180000	487730000	349460100	245439900	347280200	553300400	683229700	565179800	39.1	41.1	0	122.37
P07650	P07650	Thymidine phosphorylase	deoA	sp|P07650|TYPH_ECOLI Thymidine phosphorylase OS=Escherichia coli (strain K12) OX=83333 GN=deoA PE=1 SV=3	28	28	0.112232	0.736818	1.08717	0.000688339	0.00236162	1.51756	0.084613	0.0690853	1.04275	5.78539e-05	0.00222222	2.28898	0.958176	0.977548	0.998588	0.000256571	0.00377143	1.22374	202210100	207440000	202190100	205579900	235900100	224720000	469730100	430079700	503480300	212810100	196069900	202400000	247080100	256620000	245129800	71.1	47.207	0	291.81
P31069	P31069	Voltage-gated potassium channel Kch	kch	sp|P31069|KCH_ECOLI Voltage-gated potassium channel Kch OS=Escherichia coli (strain K12) OX=83333 GN=kch PE=1 SV=1	5	5	0.112333	0.735363	1.23705	1.8438e-06	0	6.07061	8.02154e-06	0	6.17812	0.000610041	0.00200995	3.07721	0.00073771	0.00477551	2.89636	0.0018081	0.0103462	3.38995	4708997	4243802	4706103	5146800	6854899	5046299	15280000	11256990	15932010	13933000	15361990	10676000	13841000	12486010	21200000	15.6	46.062	0	19.691
P45470	P45470	Protein YhbO	yhbO	sp|P45470|YHBO_ECOLI Protein/nucleic acid deglycase 2 OS=Escherichia coli (strain K12) OX=83333 GN=yhbO PE=1 SV=2	11	11	0.112518	0.734235	1.171	0.000104101	0	2.45079	6.18617e-05	0	2.80343	0.00012526	0.00147368	2.40047	0.0907492	0.119179	1.63216	0.000449319	0.00538614	1.87114	75924020	87300010	72588970	101610000	84324960	90164960	180580000	189529900	194450000	106650000	195800000	100180100	140809900	149990100	149240000	66.3	18.858	0	157.95
P0AD42	P0AD42	Phosphatidylglycerophosphatase C	pgpC	sp|P0AD42|PGPC_ECOLI Phosphatidylglycerophosphatase C OS=Escherichia coli (strain K12) OX=83333 GN=pgpC PE=1 SV=1	3	3	0.112534	0.731911	1.1324	0.0100633	0.0104315	1.50679	0.00104734	0.00348936	1.56496	0.00705777	0.00923596	1.53074	0.109764	0.141991	1.35708	0.0017027	0.00952764	1.33122	16055000	14808000	15165000	18274990	18467010	15513000	25854990	20017000	24987000	19310990	27635010	16885000	19270010	21282000	20739990	15.2	24.439	0	5.9373
P0A6T1;CON__Q3ZBD7	P0A6T1	Glucose-6-phosphate isomerase	pgi	sp|P0A6T1|G6PI_ECOLI Glucose-6-phosphate isomerase OS=Escherichia coli (strain K12) OX=83333 GN=pgi PE=1 SV=1	31	1	0.112772	0.730297	1.17609	0.00197852	0.00241458	1.71546	0.0162609	0.0178539	1.4031	0.00286081	0.00562051	1.59492	0.0836627	0.111628	1.27357	0.0190636	0.0305366	1.31842	1288501000	1602300000	1502900000	1568499000	1841101000	1747901000	2327000000	2453201000	2205199000	2025799000	1572401000	2012199000	1799900000	1977799000	1997499000	63	61.529	0	323.31
P0AFS3	P0AFS3	Dihydrofolate reductase FolM	folM	sp|P0AFS3|FOLM_ECOLI Dihydromonapterin reductase OS=Escherichia coli (strain K12) OX=83333 GN=folM PE=1 SV=1	4	4	0.112891	0.728943	1.63376	0.0153707	0.0152231	2.76341	0.0346123	0.0326163	2.1575	0.0841823	0.0718061	1.85103	0.0387423	0.0525017	2.43072	0.090202	0.106697	1.85092	13053000	14829010	6890599	17315000	16895010	19881990	16096000	24960000	21055000	23008010	37726000	22068000	17160010	27058010	18215000	20.4	26.348	0	7.2805
P08957	P08957	Type I restriction enzyme EcoKI M protein	hsdM	sp|P08957|T1MK_ECOLI Type I restriction enzyme EcoKI M protein OS=Escherichia coli (strain K12) OX=83333 GN=hsdM PE=1 SV=1	15	15	0.112974	0.727536	0.880194	0.037318	0.0303506	1.20275	0.0202071	0.0210844	1.27218	0.149444	0.127238	0.904258	0.89825	0.957341	1.03494	0.985631	0.991766	1.00112	39022010	39186000	43181000	38987980	35672010	32375020	33436020	38934000	37503020	53361020	25372990	54061020	37425010	44201980	40048980	37.6	59.306	0	28.618
P09099	P09099	Xylulose kinase	xylB	sp|P09099|XYLB_ECOLI Xylulose kinase OS=Escherichia coli (strain K12) OX=83333 GN=xylB PE=1 SV=1	20	20	0.113229	0.7272	0.90929	0.00030141	0	0.503002	0.000169541	0.0010087	0.656251	2.28085e-05	0	0.466279	0.000181883	0.00156863	0.450722	0.0472559	0.0654374	0.866279	1684999000	1854900000	1784400000	1719500000	1508300000	1616700000	819719800	804220300	857649900	870219500	725680400	808659800	1412600000	1617499000	1586799000	56	52.618	0	323.31
P02931	P02931	Outer membrane protein F	ompF	sp|P02931|OMPF_ECOLI Outer membrane porin F OS=Escherichia coli (strain K12) OX=83333 GN=ompF PE=1 SV=1	26	26	0.113237	0.725371	1.11897	0.0318536	0.0263594	0.762081	0.0046048	0.0079451	0.449054	0.00015787	0.00132075	1.74272	0.117815	0.149481	1.87626	0.0584295	0.0758774	0.636781	23688980000	25565020000	22712010000	28457020000	24634000000	27490010000	40553980000	43413980000	41348960000	33857040000	84280920000	31837980000	12846990000	21364030000	12939990000	87.3	39.333	0	323.31
P22106	P22106	Asparagine synthetase B [glutamine-hydrolyzing]	asnB	sp|P22106|ASNB_ECOLI Asparagine synthetase B [glutamine-hydrolyzing] OS=Escherichia coli (strain K12) OX=83333 GN=asnB PE=1 SV=3	16	16	0.11325	0.723118	0.887149	0.00197521	0.00243119	0.584983	0.000633176	0.0031619	0.542188	0.0138348	0.0155328	0.774299	0.50392	0.684886	0.871388	0.00392692	0.0137003	0.663402	127549900	150700100	144049900	117930100	124410000	131769900	111599900	113609900	101380000	148819900	85241950	144420000	92137980	86367030	101590000	36.5	62.658	0	121.4
P0AC69	P0AC69	Glutaredoxin-4	grxD	sp|P0AC69|GLRX4_ECOLI Glutaredoxin 4 OS=Escherichia coli (strain K12) OX=83333 GN=grxD PE=1 SV=1	4	4	0.113648	0.723827	1.2155	0.225814	0.168481	1.14347	0.0744227	0.0605203	1.30381	0.826327	0.900479	1.02383	0.278035	0.347457	1.53684	0.443614	0.51688	1.15477	116300000	94100030	90786960	133680100	122060100	109350000	91431020	114270000	102060100	122749900	295619800	99384980	89313940	113800000	150530000	36.5	12.879	0	26.819
P13445	P13445	RNA polymerase sigma factor RpoS	rpoS	sp|P13445|RPOS_ECOLI RNA polymerase sigma factor RpoS OS=Escherichia coli (strain K12) OX=83333 GN=rpoS PE=1 SV=3	13	12	0.113759	0.722556	1.20184	0.00425019	0.00499661	1.94557	0.000153697	0.00108411	3.63181	0.473489	0.520986	0.930591	0.948914	0.974966	0.993657	0.0201367	0.0314247	1.59345	29080000	36770990	34295980	44836990	37031020	38342980	27543020	32190980	33333000	33260020	36625000	29536010	49560020	64833980	46176980	52.7	37.971	0	150.4
P0A6M4	P0A6M4	D-aminoacyl-tRNA deacylase	dtd	sp|P0A6M4|DTD_ECOLI D-aminoacyl-tRNA deacylase OS=Escherichia coli (strain K12) OX=83333 GN=dtd PE=1 SV=1	5	5	0.114554	0.725083	0.896231	0.00026297	0	1.59822	0.58982	0.667795	1.06514	0.590087	0.683548	1.03693	0.004879	0.0102222	1.34025	0.00414072	0.0131505	0.6859	134110100	150850000	139870000	121030000	122040100	137910000	134530000	160810000	145830000	179189900	204279900	186099900	104810000	87455030	99615060	29	15.95	0	41.731
P0AB14	P0AB14	Uncharacterized protein YccJ	yccJ	sp|P0AB14|YCCJ_ECOLI Uncharacterized protein YccJ OS=Escherichia coli (strain K12) OX=83333 GN=yccJ PE=1 SV=1	4	4	0.115034	0.726233	1.19722	0.000167086	0	2.69981	0.00116877	0.0052973	3.0017	0.000285678	0.00185915	2.61905	0.316782	0.411088	1.93817	0.00103103	0.00882119	2.28205	146790100	118359900	126059900	160790100	137659900	169800100	329800000	374820000	318299900	169210000	782250000	120470000	259870000	333659800	300190000	76	8.5244	0	105.52
P0ADC3	P0ADC3	Lipoprotein-releasing system transmembrane protein LolC	lolC	sp|P0ADC3|LOLC_ECOLI Lipoprotein-releasing system transmembrane protein LolC OS=Escherichia coli (strain K12) OX=83333 GN=lolC PE=1 SV=1	10	10	0.115334	0.726287	0.815604	0.00718135	0.00752436	1.24248	0.0108438	0.013616	1.21343	0.00273955	0.00556842	1.46472	0.00091956	0.00429358	2.34992	0.324655	0.36647	0.923626	35249010	30971980	31136000	22470010	30945010	26522990	50751020	44257010	47557010	70379000	90635020	69151020	26822010	32461980	30761010	29.3	43.263	0	36.23
P37626	P37626	Uncharacterized protein YhiI	yhiI	sp|P37626|YHII_ECOLI Uncharacterized protein YhiI OS=Escherichia coli (strain K12) OX=83333 GN=yhiI PE=3 SV=1	15	15	0.11578	0.728	1.20583	0.00326208	0.00466917	1.81748	0.0117055	0.0137294	1.47903	0.00482349	0.00783158	1.66766	0.0156268	0.0281232	1.59837	0.133837	0.154841	1.19357	74037960	98759020	89321030	100330000	113349900	100689900	139929900	154399900	140200100	126820000	162590000	129339900	96277970	111360000	103580100	44.5	38.828	0	87.441
P0AB80	P0AB80	Branched-chain-amino-acid aminotransferase	ilvE	sp|P0AB80|ILVE_ECOLI Branched-chain-amino-acid aminotransferase OS=Escherichia coli (strain K12) OX=83333 GN=ilvE PE=1 SV=2	7	7	0.11758	0.735003	1.12602	0.540354	0.59124	0.934414	0.0129389	0.0154946	0.61239	0.0431329	0.041225	1.2071	0.0353306	0.0486272	0.616278	0.343848	0.391575	0.900544	300929900	352389900	322510000	368620100	340679900	388819900	359389900	419119900	399349900	181819900	267430200	164630100	248160100	332640200	302579900	27.5	34.093	0	63.779
P0AFW4	P0AFW4	Regulator of nucleoside diphosphate kinase	rnk	sp|P0AFW4|RNK_ECOLI Regulator of nucleoside diphosphate kinase OS=Escherichia coli (strain K12) OX=83333 GN=rnk PE=1 SV=1	4	4	0.118885	0.741333	1.24471	0.310593	0.258053	0.590053	0.574332	0.650451	0.908787	0.0376277	0.0355059	0.351232	0.00327807	0.00544144	0.25583	0.00342071	0.0141333	0.588211	21717010	24865990	20786990	33336000	23938020	27126990	10751000	4006101	11292990	4521398	8711197	4772001	11680000	14682000	13322000	50	14.927	0	23.824
P0ADY1	P0ADY1	Peptidyl-prolyl cis-trans isomerase D	ppiD	sp|P0ADY1|PPID_ECOLI Peptidyl-prolyl cis-trans isomerase D OS=Escherichia coli (strain K12) OX=83333 GN=ppiD PE=1 SV=1	36	36	0.118998	0.739807	1.06389	0.28451	0.229215	1.05496	0.00511173	0.00875862	1.18131	0.85532	0.920491	0.992057	0.449931	0.615791	0.964242	0.0219036	0.0338421	1.27103	943130000	981850300	903839600	1042600000	991939800	974530600	964920400	874640500	968269800	932129800	845779500	951770400	1158099000	1349199000	1099900000	73.7	68.149	0	323.31
P0ABA6	P0ABA6	ATP synthase gamma chain	atpG	sp|P0ABA6|ATPG_ECOLI ATP synthase gamma chain OS=Escherichia coli (strain K12) OX=83333 GN=atpG PE=1 SV=1	21	21	0.119235	0.739301	1.07763	0.00307164	0.00479537	1.35805	0.00854167	0.0112138	1.40008	0.000301244	0.00180822	1.71114	0.00362697	0.00566387	1.58667	0.00761169	0.016534	1.43077	861289500	941520400	965900700	984789600	973259800	1022700000	1498099000	1660900000	1577199000	1467200000	1640101000	1300200000	1301100000	1480099000	1191299000	69.3	31.577	0	323.31
P77171	P77171	Uncharacterized HTH-type transcriptional regulator YdcI	ydcI	sp|P77171|YDCI_ECOLI Uncharacterized HTH-type transcriptional regulator YdcI OS=Escherichia coli (strain K12) OX=83333 GN=ydcI PE=3 SV=2	8	8	0.119414	0.739183	1.11603	0.00656679	0.0068284	0.755587	0.00887641	0.0112919	1.28731	0.00911161	0.0109761	1.35132	0.0765432	0.104117	1.85455	0.157796	0.17995	0.904641	37785000	45139020	42117020	44555010	47424970	47254990	56730000	52450010	59573010	84268010	47729030	113919900	37803990	35884020	39203000	36.8	33.401	0	72.231
P61889	P61889	Malate dehydrogenase	mdh	sp|P61889|MDH_ECOLI Malate dehydrogenase OS=Escherichia coli (strain K12) OX=83333 GN=mdh PE=1 SV=1	24	24	0.119507	0.737581	1.1175	0.417448	0.395987	0.953854	0.322493	0.295354	0.965623	0.38056	0.392659	0.962898	0.357254	0.475932	0.932974	0.690816	0.79057	0.968023	2466199000	2521202000	2719001000	3135900000	2661899000	2826400000	2567700000	2360901000	2489800000	2208501000	2691302000	2309899000	2163499000	2613601000	2712100000	93.6	32.337	0	323.31
P08194	P08194	Glycerol-3-phosphate transporter	glpT	sp|P08194|GLPT_ECOLI Glycerol-3-phosphate transporter OS=Escherichia coli (strain K12) OX=83333 GN=glpT PE=1 SV=1	5	5	0.119819	0.73686	0.695919	0.189794	0.137783	1.51597	0.0986484	0.0782424	1.85162	8.20638e-05	0.00175	17.3751	0.419991	0.580833	0.88747	0.985994	0.991462	0.990414	2180706	1907988	2514056	1095200	1736100	1854199	45493990	27880990	43257970	1643561	1879748	2366595	4564208	2724064	817364	11.9	50.31	0	6.2966
P0A8X2	P0A8X2	Protein YceI	yceI	sp|P0A8X2|YCEI_ECOLI Protein YceI OS=Escherichia coli (strain K12) OX=83333 GN=yceI PE=1 SV=1	17	17	0.120006	0.735274	1.10799	0.0178603	0.0169394	0.831113	0.0897668	0.0721538	1.32491	0.196382	0.176327	1.09868	0.000878429	0.00433333	9.27095	0.331892	0.375628	0.917546	127270000	143000000	130140100	144049900	140580000	159090000	154599900	153039900	132760000	995160600	2024701000	936679600	106550000	132730000	129370000	82.7	20.912	0	252.03
P0AD70	P0AD70	D-alanyl-D-alanine-carboxypeptidase/endopeptidase AmpH	ampH	sp|P0AD70|AMPH_ECOLI D-alanyl-D-alanine-carboxypeptidase/endopeptidase AmpH OS=Escherichia coli (strain K12) OX=83333 GN=ampH PE=1 SV=1	8	8	0.120163	0.733092	1.31397	0.115669	0.0811387	1.32586	0.000786901	0.00372016	2.11339	0.014661	0.0172489	0.747234	0.00428101	0.00735484	2.54411	0.344863	0.391961	1.18723	28942990	29408010	27250000	34935980	48784030	30873010	24214010	20689000	19316990	61880040	99546990	62001980	25818990	33606020	44733020	24.7	41.849	0	6.5189
P68567	P68567	Ribosomal RNA small subunit methyltransferase J	rsmJ	sp|P68567|RSMJ_ECOLI Ribosomal RNA small subunit methyltransferase J OS=Escherichia coli (strain K12) OX=83333 GN=rsmJ PE=1 SV=1	5	5	0.120346	0.732651	0.713894	0.0232943	0.0218828	2.07898	0.71517	0.800197	0.918459	0.111047	0.0944955	0.666823	0.0227767	0.0364289	0.543572	0.099984	0.119109	1.6859	2659501	1957801	3420099	1668899	2022299	1919701	2166599	1458600	1670800	1497800	1280100	1491700	3358999	4056798	6261900	32.8	26.949	0	7.1655
P0A8W0	P0A8W0	Transcriptional regulator NanR	nanR	sp|P0A8W0|NANR_ECOLI HTH-type transcriptional repressor NanR OS=Escherichia coli (strain K12) OX=83333 GN=nanR PE=1 SV=1	6	6	0.120627	0.731493	1.35087	0.011607	0.012	1.64328	0.00522211	0.00867552	1.9928	0.137419	0.117339	1.23741	0.0113381	0.0212575	1.69685	0.0172323	0.0285517	1.79205	12107010	17549010	13940990	18563010	16511990	23821990	16476010	18730990	18185000	26838010	22727010	23726000	22508010	31450010	24081010	29.3	29.524	0	14.023
P0AE06	P0AE06	Multidrug efflux pump subunit AcrA	acrA	sp|P0AE06|ACRA_ECOLI Multidrug efflux pump subunit AcrA OS=Escherichia coli (strain K12) OX=83333 GN=acrA PE=1 SV=1	26	25	0.120781	0.7304	1.07946	0.0299125	0.0260863	0.878725	0.0445801	0.0404432	1.13432	0.00180426	0.00353086	0.741852	0.00557717	0.0102797	0.702953	0.00165274	0.00982383	1.3948	630829800	717949800	655610300	729580300	714919700	716039700	483270300	505479800	496259800	449299700	520459800	441070000	918190100	971000300	903720100	68	42.196	0	323.31
P0A823	P0A823	Sugar fermentation stimulation protein A	sfsA	sp|P0A823|SFSA_ECOLI Sugar fermentation stimulation protein A OS=Escherichia coli (strain K12) OX=83333 GN=sfsA PE=1 SV=1	4	4	0.121002	0.729349	1.4855	0.0282894	0.0253514	0.398825	0.168603	0.13638	1.59292	0.248855	0.22991	0.486774	0.811799	0.921196	1.04521	0.173906	0.198944	1.41502	2815801	3057301	4914298	4217798	5716003	5752300	4563001	868360	1231500	3580701	3631801	3714699	4870799	6089303	4041301	18.8	26.228	0.00050813	3.6232
P0A7F3	P0A7F3	Aspartate carbamoyltransferase regulatory chain	pyrI	sp|P0A7F3|PYRI_ECOLI Aspartate carbamoyltransferase regulatory chain OS=Escherichia coli (strain K12) OX=83333 GN=pyrI PE=1 SV=2	12	12	0.121046	0.727778	1.15139	0.361683	0.320462	0.909948	0.0650848	0.0546667	0.798518	0.000748184	0.00239648	0.590008	0.0272573	0.0409421	1.35436	0.011796	0.0213644	1.45995	544339600	472869800	562160300	613510400	651730000	552399900	322490000	302810000	304339900	629899700	807219900	706980300	871010200	748190500	690960100	84.3	17.12	0	323.31
P17315	P17315	Colicin I receptor	cirA	sp|P17315|CIRA_ECOLI Colicin I receptor OS=Escherichia coli (strain K12) OX=83333 GN=cirA PE=1 SV=2	25	25	0.121409	0.727615	1.24487	0.00563793	0.00623184	1.63727	0.0987755	0.0783563	0.636027	0.000223364	0.00212903	3.00949	0.0879659	0.11599	2.60562	0.687672	0.789533	1.06167	51094970	66919000	56939030	83111020	71605970	63110010	165839900	187740100	170440000	103070000	348729900	95818040	49836970	73721010	63411010	42.1	73.895	0	150.58
P0A7Y4	P0A7Y4	Ribonuclease HI	rnhA	sp|P0A7Y4|RNH_ECOLI Ribonuclease HI OS=Escherichia coli (strain K12) OX=83333 GN=rnhA PE=1 SV=1	3	3	0.121708	0.727163	1.23954	0.00331445	0.00465169	1.86878	0.00212869	0.00638727	1.9384	0.00447847	0.00783478	1.90666	0.00205699	0.004	2.00583	0.0340699	0.050904	1.33072	26424010	35303990	27592990	32642990	40440000	37137020	54160960	64035020	51443980	63752970	56325020	57850030	38982980	39495990	39396020	22.6	17.597	0.00051282	3.8326
P37637	P37637	Multidrug resistance protein MdtF	mdtF	sp|P37637|MDTF_ECOLI Multidrug resistance protein MdtF OS=Escherichia coli (strain K12) OX=83333 GN=mdtF PE=1 SV=1	14	14	0.121857	0.725391	4.52958	0.0029535	0.00458708	117.519	0.00342946	0.00730357	98.1928	0.103392	0.0880067	4.81009	0.0554653	0.0739851	7.81385	0.0191272	0.0304835	18.6963	1369100	1433980	154920	4458395	1970199	3217881	3965998	3438801	2481900	3370952	6070590	7090818	17154000	7928997	14614000	17.1	111.52	0	19.998
P02924	P02924	L-arabinose-binding periplasmic protein	araF	sp|P02924|ARAF_ECOLI L-arabinose-binding periplasmic protein OS=Escherichia coli (strain K12) OX=83333 GN=araF PE=1 SV=2	29	29	0.122007	0.724046	1.12555	1.48907e-06	0	0.0827062	1.45437e-06	0	0.039952	8.0004e-05	0.00177215	0.352259	7.44409e-05	0.00222222	0.0843906	1.10598e-06	0	0.040526	35417960000	41268020000	34893970000	42138010000	39610970000	43570030000	12224010000	13666000000	13345020000	2841999000	4104900000	2627501000	1528901000	1592400000	1394300000	82.1	35.54	0	323.31
P05194	P05194	3-dehydroquinate dehydratase	aroD	sp|P05194|AROD_ECOLI 3-dehydroquinate dehydratase OS=Escherichia coli (strain K12) OX=83333 GN=aroD PE=1 SV=2	14	14	0.122326	0.723216	0.982904	0.000648159	0.00245211	0.790762	0.0172451	0.0185378	0.879509	0.000310088	0.00178378	0.744849	0.318124	0.412609	0.9553	0.279319	0.314078	1.08046	147249900	149940100	149880000	148190100	144900100	146339900	107180000	116380000	109630000	134469900	153650000	139630000	181680000	154789900	148420100	57.5	27.466	0	60.153
P09424	P09424	Mannitol-1-phosphate 5-dehydrogenase	mtlD	sp|P09424|MTLD_ECOLI Mannitol-1-phosphate 5-dehydrogenase OS=Escherichia coli (strain K12) OX=83333 GN=mtlD PE=1 SV=3	19	19	0.122367	0.722	1.07722	5.22076e-05	0	1.43219	0.00302855	0.00712796	1.21207	4.23558e-05	0	1.86815	0.00281955	0.00419417	0.816129	0.00142705	0.00938636	1.31538	411779900	398840200	387440100	445930200	402010200	443690200	777180400	708559800	753359800	341080100	312200000	324830100	555920200	519340200	501600100	60.2	41.139	0	323.31
P0ADI7	P0ADI7	Isochorismatase family protein YecD	yecD	sp|P0ADI7|YECD_ECOLI Isochorismatase family protein YecD OS=Escherichia coli (strain K12) OX=83333 GN=yecD PE=1 SV=2	7	7	0.123098	0.724722	0.935452	2.0888e-05	0	0.447015	0.00837505	0.0112	0.757734	0.000183042	0.00237838	0.430976	0.00228566	0.0037095	0.611631	0.000138311	0.00275556	0.598937	105970000	97432970	104830000	93176020	94899990	100200100	47844020	45768000	39568010	68903980	65019990	55277980	63095990	58590020	62906000	48.9	20.452	0	27.32
P30138	P30138	Sulfur carrier protein ThiS adenylyltransferase	thiF	sp|P30138|THIF_ECOLI Sulfur carrier protein ThiS adenylyltransferase OS=Escherichia coli (strain K12) OX=83333 GN=thiF PE=1 SV=2	7	7	0.12329	0.724011	0.828846	0.252166	0.194151	0.877969	0.0883165	0.0712909	0.79604	0.161272	0.139468	0.835674	0.581619	0.76848	0.924704	0.283514	0.317446	0.873361	22950990	30959990	23738990	21393990	20542010	21855000	22510000	22301990	19608990	27939990	20470010	23320010	22951990	20169000	24274010	35.9	26.969	0	13.12
P76344	P76344	Metal-binding protein ZinT	zinT	sp|P76344|ZINT_ECOLI Metal-binding protein ZinT OS=Escherichia coli (strain K12) OX=83333 GN=zinT PE=1 SV=1	3	3	0.124448	0.728547	1.19424	0.286169	0.231472	1.38318	0.965602	0.980832	1.01503	0.831337	0.902302	0.920261	0.740706	0.878702	1.06177	0.301224	0.336139	0.845334	3298179	2994801	2658302	3840899	3747660	3106902	1381900	4696401	3153099	2718253	4319603	2676700	2945899	2755500	1953951	15.3	24.762	0.00050556	3.4917
P25894	P25894	Metalloprotease LoiP	loiP	sp|P25894|LOIP_ECOLI Metalloprotease LoiP OS=Escherichia coli (strain K12) OX=83333 GN=loiP PE=1 SV=2	11	11	0.124774	0.728375	1.13424	0.0103275	0.0104987	1.43717	0.00711304	0.00955444	1.81299	0.010145	0.0125546	1.32109	0.191594	0.231773	1.71272	0.0257095	0.039036	1.44637	60066980	72082970	71830970	73676970	76790050	80216020	88943000	90931940	88664990	90146960	226400100	76561970	83627960	113280000	99337030	64.7	26.842	0	100.05
P39371	P39371	N-acetylneuraminate epimerase	nanM	sp|P39371|NANM_ECOLI N-acetylneuraminate epimerase OS=Escherichia coli (strain K12) OX=83333 GN=nanM PE=1 SV=2	6	6	0.124784	0.726312	1.18376	0.434466	0.418665	0.926877	0.181627	0.147187	1.31317	0.0753976	0.06374	0.795948	0.110837	0.143429	0.626109	0.00769989	0.01671	1.64058	17043010	17796010	22458990	23122000	22258990	21954010	13879990	15935000	15529990	8060001	16791990	12352990	28448000	33960020	31133980	18.5	39.572	0	16.251
P31063	P31063	Uncharacterized lipoprotein YedD	yedD	sp|P31063|YEDD_ECOLI Uncharacterized lipoprotein YedD OS=Escherichia coli (strain K12) OX=83333 GN=yedD PE=3 SV=1	10	10	0.125101	0.726588	1.11869	0.00107681	0.00231454	1.86831	0.00221982	0.00623834	1.98376	0.00750217	0.0096234	1.3556	0.257493	0.319698	1.76363	0.0106975	0.0206623	1.60521	138490000	114790000	120100000	141489900	135500000	139420100	160900000	170640000	173230100	148580100	512620300	137510000	170369900	231239900	200449900	63.5	14.983	0	123.31
P38684	P38684	TorCAD operon transcriptional regulatory protein TorR	torR	sp|P38684|TORR_ECOLI TorCAD operon transcriptional regulatory protein TorR OS=Escherichia coli (strain K12) OX=83333 GN=torR PE=1 SV=2	4	4	0.125225	0.725228	0.743592	0.0130421	0.0132792	0.608416	0.583709	0.662509	1.19834	0.0147916	0.0173486	0.644304	0.699768	0.853798	0.930243	0.795931	0.867491	0.951271	2813549	2497601	3083899	1915801	2723902	1707420	2099199	1548100	1783601	2190699	2214501	3595901	3482310	2761638	1939799	18.7	26.233	0.0028972	2.4001
P39385	P39385	Uncharacterized protein YjiN	yjiN	sp|P39385|YJIN_ECOLI Uncharacterized protein YjiN OS=Escherichia coli (strain K12) OX=83333 GN=yjiN PE=4 SV=1	13	13	0.125362	0.724944	1.14121	0.000916538	0.00211221	2.06337	0.000225751	0.000899225	2.32955	0.00543797	0.0087362	1.71459	0.00965519	0.0180754	1.68686	0.00536942	0.0133571	1.65887	15766990	12600000	13910010	15619000	16712990	15734010	20752990	25616010	26201990	20097000	23905000	27609990	20877990	26185990	23074000	28.9	48.241	0	19.471
P0ADS6	P0ADS6	Uncharacterized protein YggE	yggE	sp|P0ADS6|YGGE_ECOLI Uncharacterized protein YggE OS=Escherichia coli (strain K12) OX=83333 GN=yggE PE=4 SV=1	16	16	0.125368	0.723462	1.16133	5.03278e-05	0	2.03572	0.000246619	0.000828571	2.70891	0.00730557	0.00927941	1.21857	0.451043	0.616479	1.28275	0.00627387	0.0150914	1.71408	609510100	650150000	596160300	806990500	628019600	730100400	739230300	798029600	724620100	648669900	1423600000	539970200	972200100	1291400000	947619500	64.2	26.635	0	239.47
P0A817	P0A817	S-adenosylmethionine synthase	metK	sp|P0A817|METK_ECOLI S-adenosylmethionine synthase OS=Escherichia coli (strain K12) OX=83333 GN=metK PE=1 SV=2	24	24	0.125527	0.723162	0.884986	0.00138445	0.00276042	0.473875	0.000636847	0.00314692	0.482659	0.923151	0.962096	0.994786	0.795292	0.912481	1.11467	0.000378485	0.00448889	0.572954	2152099000	2514401000	2488000000	2117299000	1964399000	2243599000	2404799000	2358601000	2336701000	1748199000	5760298000	1851600000	1355500000	1362601000	1371000000	69.8	41.951	0	323.31
P76035	P76035	Uncharacterized protein YciW	yciW	sp|P76035|YCIW_ECOLI Uncharacterized protein YciW OS=Escherichia coli (strain K12) OX=83333 GN=yciW PE=4 SV=2	7	7	0.125788	0.722206	0.789593	0.615101	0.69843	1.07821	0.718866	0.802817	0.949468	0.681744	0.784306	1.06586	0.369749	0.501592	1.14977	0.478383	0.559697	1.1033	14582000	18215990	22060010	14824010	14344990	13565000	21171010	16358000	20488010	19469010	19219000	23803010	21499010	18983990	19282010	21.1	42.219	0	8.1981
P76145	P76145	Trans-aconitate 2-methyltransferase	tam	sp|P76145|TAM_ECOLI Trans-aconitate 2-methyltransferase OS=Escherichia coli (strain K12) OX=83333 GN=tam PE=1 SV=3	5	5	0.12637	0.723967	1.08687	1.90025e-06	0	1.99309	0.00058145	0.00327094	2.06491	0.0534743	0.0488701	1.11563	8.70965e-05	0.00210526	1.45533	0.0370386	0.0540727	1.29661	85670030	81255970	83795960	97061020	84412960	91409020	92585020	87700030	99753960	118310000	125640000	120960000	92156980	121330000	113719900	29	29.006	0	65.684
P06149	P06149	D-lactate dehydrogenase	dld	sp|P06149|DLD_ECOLI Quinone-dependent D-lactate dehydrogenase OS=Escherichia coli (strain K12) OX=83333 GN=dld PE=1 SV=3	27	27	0.126516	0.723269	0.895216	0.0144548	0.0146636	0.780264	0.0128538	0.0155368	0.710359	0.0407281	0.0395259	0.842104	0.0930322	0.122654	1.26274	0.011563	0.0209851	0.731492	456250000	537140000	533780200	439220200	452080000	472649800	428129900	411350000	443570000	666260000	538209800	734510300	391570000	338429900	386370000	50.6	64.612	0	158.85
P37188	P37188	Galactitol-specific phosphotransferase enzyme IIB component	gatB	sp|P37188|PTKB_ECOLI PTS system galactitol-specific EIIB component OS=Escherichia coli (strain K12) OX=83333 GN=gatB PE=1 SV=2	3	3	0.126588	0.722652	1.31559	0.000592231	0.0025498	0.12833	1.91457e-06	0	0.00158705	0.123575	0.104559	1.32223	6.6431e-05	0	0.00311557	6.40334e-06	0	0.00262778	739500100	917850200	601900400	1042300000	1059700000	842220000	1104000000	1004800000	851340500	3216142	1239540	3099202	1900169	1531357	2547615	54.3	10.222	0	217.42
P0C0S1	P0C0S1	Small-conductance mechanosensitive channel	mscS	sp|P0C0S1|MSCS_ECOLI Small-conductance mechanosensitive channel OS=Escherichia coli (strain K12) OX=83333 GN=mscS PE=1 SV=1	9	9	0.127063	0.722634	1.16463	0.00129854	0.00249322	2.05829	0.0020774	0.00654348	2.0948	0.000544692	0.00210417	1.92938	0.0108717	0.0201768	1.9332	0.0125663	0.0217823	1.48311	49983980	43693020	53258960	51069980	60319960	59644960	99366060	89929960	93485980	73690990	117069900	97410940	68448020	66570010	83276010	42.7	30.896	0	93.844
P76537	P76537	Uncharacterized protein YfeY	yfeY	sp|P76537|YFEY_ECOLI Uncharacterized protein YfeY OS=Escherichia coli (strain K12) OX=83333 GN=yfeY PE=1 SV=1	6	6	0.127446	0.722604	1.17376	0.00683209	0.00687555	1.45083	0.00121287	0.00515789	2.30869	0.294847	0.28256	1.06037	0.129643	0.162243	2.36142	0.00760584	0.0165758	1.38403	58566010	58923970	58390970	79760980	59748980	68376020	65517970	64999020	56414000	94824990	340120100	82270990	76475980	92431030	75575000	52.9	20.897	0	113.27
P0A8M3	P0A8M3	Threonine--tRNA ligase	thrS	sp|P0A8M3|SYT_ECOLI Threonine--tRNA ligase OS=Escherichia coli (strain K12) OX=83333 GN=thrS PE=1 SV=1	31	31	0.127577	0.721216	0.905543	0.00221171	0.00305376	0.623222	0.0049102	0.00858915	0.707014	0.000640432	0.00197073	0.603589	0.147972	0.182621	0.625048	0.014793	0.0253996	0.779889	1251400000	1414301000	1455600000	1297201000	1200300000	1228600000	856739900	836939800	790059700	1059200000	512370200	1159201000	1026400000	1030100000	1155800000	43.1	74.013	0	323.31
P0AEM6	P0AEM6	RNA polymerase sigma factor FliA	fliA	sp|P0AEM6|FLIA_ECOLI RNA polymerase sigma factor FliA OS=Escherichia coli (strain K12) OX=83333 GN=fliA PE=1 SV=1	2	2	0.12764	0.719464	0.593671	0.542163	0.594811	0.71912	0.197424	0.162401	0.53442	0.696097	0.796947	0.879561	0.269826	0.339817	0.534697	0.0796269	0.0952671	0.425707	3131339	2259438	4986894	2288001	2215599	1456301	3261047	3783690	1945748	996099	1321999	4095918	2079328	1625493	805350	8.8	27.521	0.006967	1.8808
P75745	P75745	Uncharacterized protein YbgK	ybgK	sp|P75745|PXPC_ECOLI 5-oxoprolinase subunit C OS=Escherichia coli (strain K12) OX=83333 GN=pxpC PE=1 SV=1	10	10	0.12764	0.717504	0.869375	0.471035	0.474819	1.05052	0.679546	0.767845	1.03086	0.0633731	0.0570302	0.831063	0.814838	0.9223	0.948678	0.303778	0.339776	1.08576	105390000	124790100	125149900	112420000	97095030	99081010	98330010	106000000	90640050	145360000	75112020	128710000	127320000	137960000	119940000	30.3	34.386	0	16.474
P76004	P76004	Uncharacterized protein YcgM	ycgM	sp|P76004|YCGM_ECOLI Uncharacterized protein YcgM OS=Escherichia coli (strain K12) OX=83333 GN=ycgM PE=1 SV=1	9	9	0.12938	0.723522	0.686288	0.144773	0.102656	0.780972	0.301295	0.272107	1.20775	0.0770498	0.065661	0.563607	0.81772	0.923622	0.933226	0.399725	0.461364	0.693179	57067000	66123010	43301980	30570020	50694020	34081010	46598980	24105990	26041990	53594970	76848040	32244010	44997980	64738990	18682000	60.3	23.711	0	9.6069
P27129	P27129	Lipopolysaccharide 1,2-glucosyltransferase	rfaJ	sp|P27129|RFAJ_ECOLI Lipopolysaccharide 1,2-glucosyltransferase OS=Escherichia coli (strain K12) OX=83333 GN=rfaJ PE=3 SV=2	3	3	0.129391	0.721561	0.752494	0.0200963	0.0194974	0.397599	0.0233321	0.0240677	0.346741	0.00110697	0.00297398	0.323991	0.096209	0.124886	0.485758	0.16539	0.187555	0.721234	28861980	20935010	19104010	15517000	20001000	15848000	7833803	6654397	7530801	9954594	6797098	19554000	21255000	12807010	15909000	8	39.04	0.00049579	2.9626
P56262	P56262	Putative carboxymethylenebutenolidase	ysgA	sp|P56262|DLHH_ECOLI Putative carboxymethylenebutenolidase OS=Escherichia coli (strain K12) OX=83333 GN=ysgA PE=3 SV=3	9	9	0.129489	0.720778	1.1579	0.0012302	0.0021727	1.98219	0.0113208	0.0137345	1.3801	0.0161125	0.0180944	1.39122	0.0927069	0.121985	1.42694	0.878484	0.92814	1.02329	165880000	130140100	150159900	180390000	172150000	162050000	192330000	203570100	222940000	184380000	282449900	180849900	119990000	181760100	159260000	52	29.425	0	96.977
P0AGE9	P0AGE9	Succinyl-CoA ligase [ADP-forming] subunit alpha	sucD	sp|P0AGE9|SUCD_ECOLI Succinate--CoA ligase [ADP-forming] subunit alpha OS=Escherichia coli (strain K12) OX=83333 GN=sucD PE=1 SV=2	18	18	0.130404	0.723375	0.935003	0.00288466	0.00437008	0.668807	0.000101014	0.00136471	0.450068	0.000726044	0.00179556	0.74816	0.103106	0.133326	0.653109	0.000275416	0.00352	0.59977	4513197000	4737101000	4924202000	4519001000	4532799000	4201102000	3598701000	3595301000	3407502000	4139299000	2100801000	3372699000	2689100000	2795300000	3021701000	72	29.777	0	323.31
P32162	P32162	UPF0381 protein YiiS	yiiS	sp|P32162|YIIS_ECOLI UPF0381 protein YiiS OS=Escherichia coli (strain K12) OX=83333 GN=yiiS PE=1 SV=1	4	4	0.130757	0.723527	1.09419	1.39338e-05	0	3.38353	0.00337958	0.00736937	1.81771	4.21041e-05	0	2.77499	0.11137	0.143895	0.730841	0.000806886	0.00665672	2.03909	57943030	52010010	60458010	60152970	62661970	63321960	153429900	152570000	166320100	36111980	55614000	35413990	104979900	130540000	112720100	36.4	10.776	0	100.4
P33913	P33913	Uncharacterized protein YejA	yejA	sp|P33913|YEJA_ECOLI Uncharacterized protein YejA OS=Escherichia coli (strain K12) OX=83333 GN=yejA PE=3 SV=3	10	10	0.131086	0.723121	1.10919	0.959952	0.980314	0.998762	0.273619	0.243741	0.935274	0.679153	0.781714	1.02963	0.0022748	0.00375141	1.47241	0.628601	0.73763	0.957288	13705990	13602000	14100000	13853010	15558000	16644000	12621000	15766990	14419000	22636990	19560000	18950990	11320000	13559000	15023990	17.5	69.668	0	9.7411
P0A756	P0A756	Glutathione-regulated potassium-efflux system ancillary protein KefG	kefG	sp|P0A756|KEFG_ECOLI Glutathione-regulated potassium-efflux system ancillary protein KefG OS=Escherichia coli (strain K12) OX=83333 GN=kefG PE=3 SV=1	5	5	0.13156	0.72508	0.848679	0.106414	0.0743901	1.21956	0.98227	0.990221	1.00213	0.293601	0.281786	1.12461	0.732052	0.872866	0.945873	0.370446	0.423796	1.12978	11034000	12313000	10215000	10058010	10200000	8269006	11295990	11886000	14702000	10430000	13556000	8306500	11245010	11375000	15646000	38	20.958	0	6.7559
P10346	P10346	Glutamine transport ATP-binding protein GlnQ	glnQ	sp|P10346|GLNQ_ECOLI Glutamine transport ATP-binding protein GlnQ OS=Escherichia coli (strain K12) OX=83333 GN=glnQ PE=1 SV=1	6	6	0.13164	0.723979	0.844297	0.00113345	0.00223496	0.586593	0.00284104	0.00728329	0.669123	0.00166692	0.00319749	0.632508	0.417	0.577147	0.946361	0.00491683	0.0131215	0.722016	360290000	321769800	314599900	251669900	326760200	266920100	204010000	197830100	228670000	303419900	297359800	342609900	239209900	256710000	223550100	37.9	26.731	0	133.56
P77735	P77735	Uncharacterized oxidoreductase YajO	yajO	sp|P77735|YAJO_ECOLI 1-deoxyxylulose-5-phosphate synthase YajO OS=Escherichia coli (strain K12) OX=83333 GN=yajO PE=1 SV=2	21	21	0.131675	0.722053	1.0758	0.00353295	0.00481468	1.33218	0.996958	0.998746	1.00015	0.00382874	0.00657798	1.25492	0.0222811	0.036643	0.814652	0.0980849	0.116796	1.10646	1189700000	1312900000	1183100000	1365600000	1280099000	1316200000	1503101000	1590000000	1528101000	1030500000	914389900	1060300000	1271701000	1402001000	1404000000	69.8	36.42	0	302.39
P0AFK4	P0AFK4	Spermidine/putrescine transport system permease protein PotB	potB	sp|P0AFK4|POTB_ECOLI Spermidine/putrescine transport system permease protein PotB OS=Escherichia coli (strain K12) OX=83333 GN=potB PE=1 SV=1	4	4	0.13213	0.722228	0.794406	0.339116	0.291445	0.892289	0.206837	0.172615	0.843404	0.0794811	0.0676313	1.21461	0.0124781	0.0235417	1.58123	0.914022	0.946717	0.96226	4927400	4674701	5947598	3375899	4401998	4621699	6669705	5821100	6322802	7075002	8304403	9218501	3698899	9521972	3465702	13.1	31.062	0.0014663	2.642
P76550	P76550	Uncharacterized protein YffS	yffS	sp|P76550|YFFS_ECOLI Uncharacterized protein YffS OS=Escherichia coli (strain K12) OX=83333 GN=yffS PE=4 SV=2	16	16	0.132333	0.720317	1.17522	0.012654	0.0133188	1.42675	0.000702668	0.00396491	1.61174	0.00128783	0.00277778	1.489	0.0307419	0.0436636	1.45771	0.14459	0.164755	1.32439	233359900	264160100	271499900	335449800	262600100	308389900	374260000	375040100	393639900	332300000	460190100	339009900	261690000	437090200	339899800	53.5	29.751	0	70.112
P09158	P09158	Polyamine aminopropyltransferase	speE	sp|P09158|SPEE_ECOLI Polyamine aminopropyltransferase OS=Escherichia coli (strain K12) OX=83333 GN=speE PE=1 SV=2	6	6	0.132745	0.719631	0.911581	0.873563	0.929972	1.01301	0.00150984	0.0057737	1.48214	0.00117825	0.00291971	1.39703	0.00311604	0.00511111	1.89598	0.0126606	0.0224836	0.820156	97587020	104930000	106160000	98818980	86364980	96485030	149120100	135130000	147090000	231800000	165780000	192800000	86516980	78274040	88556980	32.6	32.321	0	33.339
P0AFQ7	P0AFQ7	Uncharacterized deoxyribonuclease YcfH	ycfH	sp|P0AFQ7|YCFH_ECOLI Uncharacterized metal-dependent hydrolase YcfH OS=Escherichia coli (strain K12) OX=83333 GN=ycfH PE=1 SV=1	4	4	0.133685	0.723474	0.752595	0.791097	0.868522	1.03758	0.30376	0.275214	1.21275	0.994556	0.997154	0.999015	0.487965	0.66743	1.16624	0.0529211	0.0705403	1.36329	8538396	12570990	10756000	8974195	8486695	6461698	12055000	10299000	9271498	14813000	14104000	8765495	13929000	14823010	14167990	19.6	29.808	0	7.5775
P75839	P75839	UPF0702 transmembrane protein YcaP	ycaP	sp|P75839|YCAP_ECOLI UPF0702 transmembrane protein YcaP OS=Escherichia coli (strain K12) OX=83333 GN=ycaP PE=3 SV=1	1	1	0.133757	0.721942	2.24853	0.987168	0.993771	0.989948	0.303169	0.274704	1.66837	0.605511	0.704173	0.717234	0.281795	0.35204	1.78828	0.978832	0.986706	0.983263	4335170	14939000	3988197	13346990	13530010	16260010	10366680	2790758	3294009	12397000	7909105	15065010	2711896	9717504	9317196	3.9	26.282	0	6.2384
P37051	P37051	Formyltetrahydrofolate deformylase	purU	sp|P37051|PURU_ECOLI Formyltetrahydrofolate deformylase OS=Escherichia coli (strain K12) OX=83333 GN=purU PE=1 SV=1	10	10	0.134077	0.722188	1.14606	0.0191293	0.0189957	1.40569	0.0225229	0.0234483	1.29753	0.000871728	0.00285	1.88015	0.00247429	0.00419149	1.74547	0.0491345	0.0675659	1.22413	133030000	144700000	169259900	172820000	172980000	164060000	281430000	277009900	277770200	281510000	248100000	248080000	182360100	186099900	176109900	47.1	31.934	0	35.768
P39337	P39337	Uncharacterized N-acetyltransferase YjgM	yjgM	sp|P39337|YJGM_ECOLI Uncharacterized N-acetyltransferase YjgM OS=Escherichia coli (strain K12) OX=83333 GN=yjgM PE=3 SV=2	6	6	0.134178	0.720303	1.12504	0.0404412	0.0319821	0.628314	0.320459	0.293331	0.84535	0.00144173	0.00264901	0.603238	0.00221547	0.00383815	0.614507	0.0604224	0.0782247	1.27748	18451000	20894000	22305000	23850980	21744990	23609010	13103990	11696000	12316010	13650010	11849000	12337000	22942010	26151980	29878990	27.5	18.622	0	11.172
P00363	P00363	Fumarate reductase flavoprotein subunit	frdA	sp|P00363|FRDA_ECOLI Fumarate reductase flavoprotein subunit OS=Escherichia coli (strain K12) OX=83333 GN=frdA PE=1 SV=3	25	25	0.134533	0.720635	0.927574	3.83772e-05	0	0.582739	0.000197244	0.00095082	0.423877	0.00313904	0.00550754	0.835964	0.00262826	0.00404103	0.364694	0.000214801	0.00419048	0.40712	756219700	803460400	821250400	776710000	695970400	736689700	660409700	680080100	649049900	324300200	215159900	346870000	304179800	300620100	368220200	41.2	65.971	0	257.2
P0A825	P0A825	Serine hydroxymethyltransferase	glyA	sp|P0A825|GLYA_ECOLI Serine hydroxymethyltransferase OS=Escherichia coli (strain K12) OX=83333 GN=glyA PE=1 SV=1	21	21	0.13458	0.719127	0.945483	0.688695	0.781966	1.01306	0.092896	0.0732405	0.903728	0.00402878	0.00706998	1.19806	0.207751	0.253001	1.15422	0.00391235	0.0137483	0.847132	2792201000	2831700000	2676700000	2490099000	2694598000	2665900000	3431298000	3154899000	3361899000	3454900000	2647299000	3558101000	2441201000	2264599000	2327301000	53.2	45.316	0	323.31
P0AB43	P0AB43	Protein YcgL	ycgL	sp|P0AB43|YCGL_ECOLI Protein YcgL OS=Escherichia coli (strain K12) OX=83333 GN=ycgL PE=1 SV=3	6	6	0.135424	0.721513	0.922382	0.0226825	0.0218311	0.684013	0.00332997	0.00740271	0.641803	0.000796117	0.00233476	0.731591	0.000742155	0.00472727	0.770249	0.175683	0.201075	0.846203	75073000	80694040	82248040	72769030	69217980	77627980	58732020	59554980	55777980	60988980	61496000	60707980	57347970	65580020	80275970	46.3	12.414	0	9.3143
P0A870	P0A870	Transaldolase B	talB	sp|P0A870|TALB_ECOLI Transaldolase B OS=Escherichia coli (strain K12) OX=83333 GN=talB PE=1 SV=2	30	28	0.135901	0.72246	1.05992	0.000346995	0.000512315	1.32907	0.0034917	0.00725499	1.3748	5.56979e-05	0.00229508	1.52392	0.0110018	0.0200659	1.53122	0.111652	0.129449	1.0574	4585006000	4879499000	4831598000	4809801000	5140502000	5205802000	7386099000	7074300000	7321409000	7225098000	8610309000	6238200000	4844902000	5146500000	5125396000	86.1	35.219	0	323.31
P10384	P10384	Long-chain fatty acid transport protein	fadL	sp|P10384|FADL_ECOLI Long-chain fatty acid transport protein OS=Escherichia coli (strain K12) OX=83333 GN=fadL PE=1 SV=5	17	17	0.136513	0.72367	1.14718	0.0012239	0.00217877	1.35487	0.000835877	0.003616	2.20755	0.0255909	0.0259709	1.22172	0.191781	0.23204	1.68821	0.0154661	0.0262964	1.56204	1840300000	1875800000	1697301000	2339700000	2036099000	1856799000	1999700000	2280900000	2342501000	2241701000	5912701000	2126900000	2457399000	3467901000	2620400000	55.2	48.541	0	323.31
P77257	P77257	Autoinducer 2 import ATP-binding protein LsrA	lsrA	sp|P77257|LSRA_ECOLI Autoinducer 2 import ATP-binding protein LsrA OS=Escherichia coli (strain K12) OX=83333 GN=lsrA PE=1 SV=1	9	9	0.137515	0.72618	0.830184	0.00135976	0.00279683	0.481558	0.000150641	0.00112621	0.287033	0.00464298	0.00794872	0.593756	0.00500369	0.0101099	0.266848	0.00194873	0.0111336	0.436266	82763000	104430000	110670000	89296940	80597020	76042950	60264960	56167000	59152040	27871000	17543000	37172980	37157010	46171000	46295020	19.2	55.821	0	20.944
P69805	P69805	Mannose permease IID component	manZ	sp|P69805|PTND_ECOLI PTS system mannose-specific EIID component OS=Escherichia coli (strain K12) OX=83333 GN=manZ PE=1 SV=2	11	11	0.137924	0.725313	1.15009	0.000992705	0.00200627	0.502656	0.000428086	0.00291111	0.337682	0.139084	0.118484	1.0908	0.00732847	0.0153158	0.252231	3.74011e-05	0	0.33751	244130200	266549800	287099800	282240100	342820200	293730000	292510000	287880100	287950200	42461020	108000000	65375030	84932040	90623030	93321990	37.1	30.955	0	41.213
P0A7V3	P0A7V3	30S ribosomal protein S3	rpsC	sp|P0A7V3|RS3_ECOLI 30S ribosomal protein S3 OS=Escherichia coli (strain K12) OX=83333 GN=rpsC PE=1 SV=2	18	18	0.138144	0.724921	0.916706	0.00732702	0.00763636	0.736088	0.00904962	0.0115392	0.762303	0.00218038	0.00488136	0.764717	0.0993276	0.129496	0.654219	0.020789	0.0321611	0.818611	2935999000	3299099000	3262099000	2792998000	3067799000	2840800000	2379800000	2416300000	2457301000	2323501000	1413701000	2693501000	2732800000	2397900000	2645099000	65.2	25.983	0	323.31
P39160	P39160	D-mannonate oxidoreductase	uxuB	sp|P39160|UXUB_ECOLI D-mannonate oxidoreductase OS=Escherichia coli (strain K12) OX=83333 GN=uxuB PE=3 SV=1	13	12	0.138286	0.723602	0.905876	4.46633e-06	0	0.380231	1.06673e-05	0	0.418749	0.00547996	0.00868293	0.720768	0.0336927	0.0468877	0.546837	0.000647666	0.00578512	0.651529	247039900	230400000	248530100	240979900	208440100	209350100	156519900	180649900	187330000	154339900	90881950	164910000	162420000	146330100	164610100	28	53.58	0	127.98
P0AC41	P0AC41	Succinate dehydrogenase flavoprotein subunit	sdhA	sp|P0AC41|SDHA_ECOLI Succinate dehydrogenase flavoprotein subunit OS=Escherichia coli (strain K12) OX=83333 GN=sdhA PE=1 SV=1	25	25	0.138949	0.727226	0.866135	0.00198411	0.00240909	0.555316	0.00419796	0.00746341	0.510484	0.00937025	0.0114604	0.735357	0.119194	0.151168	0.637077	0.00987705	0.0205011	0.614747	2459999000	2818001000	3062402000	2194200000	2487300000	2527499000	2090900000	2032200000	1986701000	2030301000	1148200000	2354701000	1698699000	1473900000	1969900000	51	64.421	0	323.31
P0AGG4	P0AGG4	Thioredoxin-2	trxC	sp|P0AGG4|THIO2_ECOLI Thioredoxin 2 OS=Escherichia coli (strain K12) OX=83333 GN=trxC PE=1 SV=1	4	4	0.139429	0.728964	1.42069	0.0274075	0.0247386	1.97961	0.120738	0.0944387	1.42535	0.00656338	0.00903053	2.08786	0.567554	0.754913	1.20988	0.0138999	0.0247344	1.63667	6364703	9376796	8095103	11304000	8485202	14443000	14687000	19404990	15428000	11763000	13466000	5401602	12258000	13707010	12605990	32.4	15.555	0	7.8565
P0ADR6	P0ADR6	Ribosomal RNA large subunit methyltransferase M	rlmM	sp|P0ADR6|RLMM_ECOLI Ribosomal RNA large subunit methyltransferase M OS=Escherichia coli (strain K12) OX=83333 GN=rlmM PE=1 SV=1	4	4	0.140242	0.730866	0.715002	0.0181639	0.0173836	0.523419	0.157881	0.125806	0.604391	0.00729911	0.0092965	0.458145	0.102014	0.132521	0.542654	0.622784	0.732397	0.825623	34028020	23752990	27812000	16279000	26949010	18730000	11184000	11915000	16222000	19375000	8941497	20735000	45848000	14829010	18608000	14.5	41.905	0	7.0396
P75811	P75811	HTH-type transcriptional regulator RcdA	rcdA	sp|P75811|RCDA_ECOLI HTH-type transcriptional regulator RcdA OS=Escherichia coli (strain K12) OX=83333 GN=rcdA PE=1 SV=3	1	1	0.141263	0.732576	0.762271	0.0197029	0.0195148	0.62198	0.0359358	0.0338828	0.618357	0.0264892	0.0268201	0.554213	0.277638	0.34726	0.659257	0.072486	0.0886794	0.6221	3504201	2564000	3604101	2024099	2475199	2862800	1820140	2187599	1384400	2610201	1132950	3137501	1874968	2691298	1545000	5.1	20.307	0.0096507	1.7307
P0A8B2	P0A8B2	UPF0115 protein YfcN	yfcN	sp|P0A8B2|YFCN_ECOLI UPF0115 protein YfcN OS=Escherichia coli (strain K12) OX=83333 GN=yfcN PE=3 SV=1	4	4	0.141263	0.73073	0.70179	0.0157765	0.0160823	0.614924	0.0610227	0.0510438	0.738463	0.191422	0.171692	0.820724	0.0699645	0.0942118	0.63739	0.299648	0.334412	0.830491	15654000	12384000	10760000	11988000	6911602	8701505	9314905	10764990	11499990	6075697	9663197	9200201	8495698	11955000	11764000	33.3	21.013	0	11.69
P27862	P27862	IMPACT family member YigZ	yigZ	sp|P27862|YIGZ_ECOLI IMPACT family member YigZ OS=Escherichia coli (strain K12) OX=83333 GN=yigZ PE=1 SV=2	2	2	0.14128	0.728894	3.92835	0.129783	0.090577	4.13629	0.773734	0.847445	1.3181	0.276561	0.260657	2.75304	0.240881	0.299954	4.35568	0.284776	0.318128	2.5927	1059404	3742199	13990000	16611000	15202000	13315010	13175010	15263000	5755100	37782010	3584864	33839010	10882000	6701498	13255010	12.3	21.757	0.00049677	2.993
P0A830	P0A830	Aerobic C4-dicarboxylate transport protein	dctA	sp|P0A830|DCTA_ECOLI Aerobic C4-dicarboxylate transport protein OS=Escherichia coli (strain K12) OX=83333 GN=dctA PE=1 SV=1	6	6	0.141289	0.727068	0.833981	1.60252e-06	0	0.0876425	6.00661e-07	0	0.0590323	0.000198315	0.00227586	0.261317	3.06205e-06	0	0.0988349	3.03691e-05	0	0.103717	582960200	561200100	593799700	443060100	587129900	433180000	173790100	124210000	160589900	60051970	50840000	61431960	70678970	49146030	62398010	16.4	45.436	0	76.65
P07762	P07762	1,4-alpha-glucan branching enzyme GlgB	glgB	sp|P07762|GLGB_ECOLI 1,4-alpha-glucan branching enzyme GlgB OS=Escherichia coli (strain K12) OX=83333 GN=glgB PE=1 SV=1	20	20	0.142062	0.72801	1.07661	0.21122	0.155594	0.888229	0.0685476	0.0569069	1.09482	0.0109584	0.0133672	0.867814	0.839019	0.933184	1.05245	0.00216086	0.0118062	0.739582	119289900	124170000	130850000	129180000	142510100	131379900	108379900	111299900	105010100	157679900	82399980	173899900	89842970	88545970	98559980	32.8	84.336	0	53.395
P45425	P45425	N-acetylmannosamine kinase	nanK	sp|P45425|NANK_ECOLI N-acetylmannosamine kinase OS=Escherichia coli (strain K12) OX=83333 GN=nanK PE=1 SV=2	6	6	0.142161	0.726195	0.855591	0.00156058	0.00268354	0.467665	0.00117157	0.00527946	0.539853	0.234666	0.214544	0.90075	0.00142304	0.00329577	0.482317	0.000918796	0.00785612	0.464079	53557010	56018020	67495020	47993020	55292010	47794010	50968000	52481020	55326010	29433990	25172980	30664000	26672010	30025990	25271990	26.8	29.644	0	19.766
P00803	P00803	Signal peptidase I	lepB	sp|P00803|LEP_ECOLI Signal peptidase I OS=Escherichia coli (strain K12) OX=83333 GN=lepB PE=1 SV=2	16	16	0.142276	0.725234	0.90463	0.0404633	0.0319251	1.16567	0.0376716	0.0354463	1.17819	0.660378	0.761287	1.02437	0.677082	0.839915	0.973708	0.036396	0.0534851	1.17077	241070100	279289900	242460100	236180000	235120100	217630000	251719800	265710000	262349900	232610100	262459900	246849900	287239900	302129800	301869900	40.4	35.96	0	44.087
P08179	P08179	Phosphoribosylglycinamide formyltransferase	purN	sp|P08179|PUR3_ECOLI Phosphoribosylglycinamide formyltransferase OS=Escherichia coli (strain K12) OX=83333 GN=purN PE=1 SV=1	8	8	0.142573	0.724179	1.08917	0.000500048	0.0016	1.52818	0.000251613	0.000811189	1.66763	0.00803717	0.0101637	1.46066	0.00228607	0.00368889	1.68935	0.0286934	0.0431038	1.22753	34150020	38259020	37816990	40266020	41919980	37821990	55996020	58664040	46874000	57234960	70756010	58823020	41829020	49483030	44153980	55.2	23.238	0	17.555
P0AG07	P0AG07	Ribulose-phosphate 3-epimerase	rpe	sp|P0AG07|RPE_ECOLI Ribulose-phosphate 3-epimerase OS=Escherichia coli (strain K12) OX=83333 GN=rpe PE=1 SV=1	11	11	0.142587	0.722386	1.04671	0.0894531	0.0632427	0.864382	9.57636e-05	0.0014321	1.2228	0.00203555	0.00397668	0.857228	0.141035	0.172533	1.50491	0.401572	0.463941	1.10095	319569900	321439800	325470200	353500000	325679800	333019900	284569900	278979900	265280000	394419800	757200100	381540100	292700000	367010000	415320000	65.3	24.554	0	323.31
P40874	P40874	N-methyl-L-tryptophan oxidase	solA	sp|P40874|MTOX_ECOLI N-methyl-L-tryptophan oxidase OS=Escherichia coli (strain K12) OX=83333 GN=solA PE=1 SV=1	16	16	0.142704	0.721086	1.08382	0.0836917	0.0588989	1.12658	0.308803	0.280495	1.13217	0.0088596	0.0110706	1.21823	0.0206465	0.035349	1.34816	0.658981	0.763871	1.04147	54397990	56546020	62383000	61417020	61492010	64686980	71208990	70156970	69444010	87078000	68536030	78784950	52551970	68125980	60547040	58.6	40.902	0	64.897
P37676	P37676	2,3-diketo-L-gulonate-binding periplasmic protein YiaO	yiaO	sp|P37676|YIAO_ECOLI 2,3-diketo-L-gulonate-binding periplasmic protein YiaO OS=Escherichia coli (strain K12) OX=83333 GN=yiaO PE=1 SV=1	5	5	0.142976	0.720424	1.32738	0.000147702	0	0.408883	0.0322838	0.0307833	0.535327	0.0260343	0.0261691	0.591922	0.106528	0.137204	0.361942	0.0371956	0.0541667	0.761475	18522000	21468000	20151010	35828980	22975000	22764990	9782600	15771000	10771000	2842131	9100303	14689000	13489000	14898000	17605010	17.7	35.97	0	4.8727
P60716	P60716	Lipoyl synthase	lipA	sp|P60716|LIPA_ECOLI Lipoyl synthase OS=Escherichia coli (strain K12) OX=83333 GN=lipA PE=1 SV=1	13	13	0.143363	0.721376	0.884879	3.09293e-05	0	0.449664	9.3875e-06	0	0.374859	6.66053e-05	0.00202899	0.609133	0.00233029	0.00364835	0.441576	0.000213932	0.00425806	0.727521	191240000	186340000	189969900	191339900	156310000	156830000	111319900	112920100	121720100	88332000	66551000	99155050	136769900	132580000	143760000	36.8	36.071	0	63.37
P69411	P69411	Outer membrane lipoprotein RcsF	rcsF	sp|P69411|RCSF_ECOLI Outer membrane lipoprotein RcsF OS=Escherichia coli (strain K12) OX=83333 GN=rcsF PE=1 SV=1	5	5	0.143889	0.722137	1.2266	0.00689397	0.00697661	1.74159	0.0125763	0.015224	1.9183	0.0448865	0.0424979	1.39718	0.168195	0.20681	1.76428	0.0449664	0.0637531	1.56203	190170000	237039900	243739900	320460100	250850100	252239900	318970100	264830100	354759800	324270200	743820300	250159900	303409900	453459700	304360100	44.8	14.163	0	96.389
P30748	P30748	Molybdopterin synthase sulfur carrier subunit	moaD	sp|P30748|MOAD_ECOLI Molybdopterin synthase sulfur carrier subunit OS=Escherichia coli (strain K12) OX=83333 GN=moaD PE=1 SV=2	2	2	0.14501	0.725653	1.12381	0.0605773	0.0433677	1.26591	0.0739437	0.0603884	1.27918	0.282427	0.267512	0.845486	0.46577	0.638905	1.2692	0.0193967	0.0308345	2.171	10538000	8920998	10871990	11501000	10878000	11595000	6929498	10519000	8474698	9298897	22792000	9859596	17489000	18519990	32289010	37	8.7578	0	11.994
P71298	P71298	Putative prophage CP4-6 integrase	intF	sp|P71298|INTF_ECOLI Prophage integrase IntF OS=Escherichia coli (strain K12) OX=83333 GN=intF PE=3 SV=1	1	1	0.14719	0.732937	1.8627	0.254567	0.196147	0.605862	0.720592	0.804459	1.10735	0.263388	0.24575	2.09918	0.623113	0.804652	1.29423	0.313869	0.352613	1.39323	3281100	1695525	1509793	3642399	2513737	5928702	2659814	2439202	11975450	1275326	5474510	2608014	2943010	3637601	2121794	2.6	53.073	0.0033254	2.1995
P60546	P60546	Guanylate kinase	gmk	sp|P60546|KGUA_ECOLI Guanylate kinase OS=Escherichia coli (strain K12) OX=83333 GN=gmk PE=1 SV=1	7	7	0.148227	0.736847	1.06941	0.000128464	0	1.78567	0.000605698	0.0032549	1.48148	0.000742403	0.00240708	1.41832	0.0931424	0.122504	1.19874	0.0418402	0.0588777	1.21947	131530100	147420000	139890000	151380000	143910000	152280100	193680100	194899900	205019900	163230000	192580100	148640000	186869900	172320100	152760000	37.7	23.592	0	26.54
P40710	P40710	Lipoprotein NlpE	nlpE	sp|P40710|NLPE_ECOLI Lipoprotein NlpE OS=Escherichia coli (strain K12) OX=83333 GN=nlpE PE=1 SV=1	12	12	0.149864	0.742524	1.10369	0.0298594	0.0260345	1.1905	0.00095997	0.00361765	1.79627	0.0680019	0.0588582	0.834522	0.0562326	0.0751632	0.399662	0.0299356	0.0444418	1.35794	162760100	163770000	189129900	187509900	181919900	198690100	130759900	142230000	157539900	47499020	135430000	50029010	201180000	263469800	238160100	50	25.844	0	300.99
P17109	P17109	2-succinyl-5-enolpyruvyl-6-hydroxy-3-cyclohexene-1-carboxylate synthase	menD	sp|P17109|MEND_ECOLI 2-succinyl-5-enolpyruvyl-6-hydroxy-3-cyclohexene-1-carboxylate synthase OS=Escherichia coli (strain K12) OX=83333 GN=menD PE=1 SV=4	4	4	0.150402	0.741869	0.769978	0.00872837	0.00926035	1.68315	0.0693365	0.0572054	1.45262	0.0275286	0.0276014	1.58769	0.132862	0.164396	1.33722	0.148526	0.169368	1.27956	3378100	3702202	4594102	3283999	2359500	3384899	7493498	5656898	5424603	5528697	4051599	6133304	4077101	5819000	5073599	9.2	61.366	0.00050352	3.3571
P0ADM0	P0ADM0	Inner membrane protein YidH	yidH	sp|P0ADM0|YIDH_ECOLI Inner membrane protein YidH OS=Escherichia coli (strain K12) OX=83333 GN=yidH PE=1 SV=1	2	2	0.150515	0.740831	1.15598	0.0169953	0.0162841	1.40926	0.00510034	0.00877543	2.50174	0.00194427	0.00382143	0.801136	0.120267	0.151502	0.258992	0.0461494	0.064865	1.59384	11645000	12444000	12935000	16160990	14400000	12441990	9880605	9882198	9870695	12328990	1329474	1986631	16164010	27007010	17385000	13	12.779	0.0092251	1.7656
P77717	P77717	Uncharacterized lipoprotein YbaY	ybaY	sp|P77717|YBAY_ECOLI Uncharacterized lipoprotein YbaY OS=Escherichia coli (strain K12) OX=83333 GN=ybaY PE=1 SV=1	6	6	0.15081	0.740482	1.48468	0.00132885	0.00283422	4.25098	0.00318248	0.00697912	4.07786	0.00146636	0.00309211	2.81742	0.392859	0.539251	1.63204	0.0177788	0.0291203	2.56241	44247000	35528980	28225990	75323040	42330990	45544000	99030060	95218960	105239900	47202970	148029900	27604990	64473010	130790000	88534030	81.1	19.431	0	323.31
P07013	P07013	Primosomal replication protein n	priB	sp|P07013|PRIB_ECOLI Primosomal replication protein N OS=Escherichia coli (strain K12) OX=83333 GN=priB PE=1 SV=3	2	2	0.151194	0.739423	0.844233	0.0070459	0.00709827	1.60734	0.104274	0.0822813	1.42158	0.0811651	0.0689134	1.3274	0.766826	0.892932	1.06106	0.689832	0.790393	1.08605	42786000	33083980	32212990	31021000	31184980	28362000	44665000	42815990	55768030	34957000	51922960	30010990	31321000	34382010	54241010	24	11.442	0	4.0889
P64554	P64554	7-carboxy-7-deazaguanine synthase	queE	sp|P64554|QUEE_ECOLI 7-carboxy-7-deazaguanine synthase OS=Escherichia coli (strain K12) OX=83333 GN=queE PE=3 SV=1	3	3	0.152078	0.742974	1.11494	0.016692	0.0163645	1.36208	0.0232198	0.0241222	1.33185	0.563201	0.649743	1.05758	0.0545685	0.0724258	0.780751	0.0499289	0.0681261	1.25603	12013000	11892000	13819000	13007010	14790000	14223000	13776010	14753000	11489990	11451000	9039795	9076500	15320010	14285000	17875000	18.4	25.029	0	6.6973
P0AFF4	P0AFF4	Nucleoside permease NupG	nupG	sp|P0AFF4|NUPG_ECOLI Nucleoside permease NupG OS=Escherichia coli (strain K12) OX=83333 GN=nupG PE=1 SV=1	1	1	0.152287	0.741656	0.1395	0.0507819	0.0376519	0.109402	0.120701	0.0945089	0.179841	0.0780492	0.0661574	0.0916695	0.0440616	0.0594581	0.0846516	0.147406	0.168489	0.149546	96641030	9191205	8666099	1887513	12423990	891107	763807	1254458	6188602	989519	2853799	1653545	11972000	1352453	1590000	2.4	46.389	0.0014556	2.5173
P0AE01	P0AE01	tRNA (cytidine/uridine-2-O-)-methyltransferase TrmJ	trmJ	sp|P0AE01|TRMJ_ECOLI tRNA (cytidine/uridine-2-O-)-methyltransferase TrmJ OS=Escherichia coli (strain K12) OX=83333 GN=trmJ PE=1 SV=1	6	6	0.152637	0.741862	1.08103	0.125932	0.0877942	1.13788	0.144427	0.112493	0.870274	0.371348	0.379969	1.10495	0.15401	0.189982	0.837237	0.004511	0.0132141	1.31801	141590000	147190000	163230000	158639900	164580000	164600100	175900000	139400000	187159900	144450000	105770000	130670100	207160100	192769900	195039900	38.2	27.048	0	100.95
P13024	P13024	Protein FdhE	fdhE	sp|P13024|FDHE_ECOLI Protein FdhE OS=Escherichia coli (strain K12) OX=83333 GN=fdhE PE=1 SV=2	10	10	0.152778	0.740371	0.881708	0.935058	0.967052	1.00706	0.382805	0.372058	1.03846	0.0661448	0.057859	0.829262	0.700828	0.854002	1.05142	0.0852186	0.101166	0.920134	58391980	65654020	62644000	50685970	52338000	62052980	50063020	46752010	58513000	75716020	51920020	71006020	57202960	58525990	55883020	43	34.746	0	35.17
P0A821	P0A821	L-seryl-tRNA(Sec) selenium transferase	selA	sp|P0A821|SELA_ECOLI L-seryl-tRNA(Sec) selenium transferase OS=Escherichia coli (strain K12) OX=83333 GN=selA PE=1 SV=1	16	16	0.152892	0.738907	0.889769	0.0608206	0.0432968	0.849225	0.0617855	0.0525017	0.78259	0.259891	0.242104	0.923421	0.324326	0.42101	0.922493	0.766836	0.846726	1.03631	91692000	94236980	110049900	93092050	82748010	86956980	89360950	94751060	88432020	97420980	83722980	91524020	89394980	96131950	123150000	45.6	50.607	0	41.047
P69910	P69910	Glutamate decarboxylase beta	gadB	sp|P69910|DCEB_ECOLI Glutamate decarboxylase beta OS=Escherichia coli (strain K12) OX=83333 GN=gadB PE=1 SV=1	22	1	0.154341	0.743242	1.15364	4.66624e-05	0	8.01102	9.10087e-05	0.00156757	8.42804	9.04189e-05	0.00168675	3.51162	0.00189218	0.002925	0.17949	0.0025834	0.0125267	2.38385	109300000	140020000	131090000	155069900	138060000	143880000	431810000	467290200	430550200	28442020	14463000	28202000	244530000	318909800	348510000	46.6	52.668	0.0028874	2.3589
P0AEW9	P0AEW9	1-phosphofructokinase	fruK	sp|P0AEW9|K1PF_ECOLI 1-phosphofructokinase OS=Escherichia coli (strain K12) OX=83333 GN=fruK PE=3 SV=1	6	6	0.154493	0.742043	1.15242	0.0141638	0.0146432	1.35024	0.0648439	0.0545043	1.24842	0.00399684	0.00708597	1.7199	0.255891	0.316643	0.810176	0.135609	0.156901	1.1763	30523010	24086010	25679990	28447020	32460000	31291990	49541030	40953010	47342030	28168990	17325990	20571010	33913000	31793990	28499000	19.2	33.755	0	16.432
P52060	P52060	UPF0235 protein YggU	yggU	sp|P52060|YGGU_ECOLI UPF0235 protein YggU OS=Escherichia coli (strain K12) OX=83333 GN=yggU PE=3 SV=2	3	3	0.154717	0.740953	0.483468	0.0824324	0.0583614	0.57924	0.657635	0.745741	0.872556	0.0351618	0.03331	0.559958	0.721879	0.867255	0.808492	0.240115	0.268407	0.512755	3583613	5962297	5321287	4341800	1154093	2564159	2346947	2572036	3307034	1394453	8346195	5162802	1658055	6211603	1488257	45.8	10.456	0	4.6762
P07117	P07117	Sodium/proline symporter	putP	sp|P07117|PUTP_ECOLI Sodium/proline symporter OS=Escherichia coli (strain K12) OX=83333 GN=putP PE=1 SV=1	6	6	0.154934	0.740245	0.720833	0.000527035	0.00212766	0.28104	0.00278445	0.00733659	0.432111	0.010994	0.013346	0.548227	0.0200359	0.0341944	0.499543	0.00351496	0.0140294	0.40914	165619900	236670100	190159900	103220000	166760000	162190000	115370000	90407030	117750000	116690000	71898040	110749900	81877000	66362980	93950980	14.9	54.344	0	18.244
P13857	P13857	Ribosomal-protein-serine acetyltransferase	rimL	sp|P13857|RIML_ECOLI Ribosomal-protein-serine acetyltransferase OS=Escherichia coli (strain K12) OX=83333 GN=rimL PE=1 SV=1	4	4	0.155035	0.738967	0.905095	5.79899e-05	0	0.419689	9.21636e-05	0.00150649	0.336225	0.000685942	0.00184475	0.622549	0.00592065	0.0122749	0.453544	5.22487e-05	0	0.288209	96057000	112140100	108540000	89438960	98138960	98762940	63712020	65650020	67444010	51585980	36396020	58096980	27915000	33068980	30320980	34.1	20.68	0	21.363
P30749	P30749	Molybdopterin synthase catalytic subunit	moaE	sp|P30749|MOAE_ECOLI Molybdopterin synthase catalytic subunit OS=Escherichia coli (strain K12) OX=83333 GN=moaE PE=1 SV=3	8	8	0.155234	0.73896	1.06796	0.0436938	0.0341319	1.17428	0.00791099	0.0111447	1.36644	0.82148	0.897995	0.979808	0.399132	0.548203	1.30697	0.000308063	0.00486747	2.71955	80914000	80882020	79107980	90615000	79962960	87030010	67077020	89362020	81244050	86823940	183390100	72590020	191090100	256010100	212859900	74.7	16.981	0	32.164
P76237	P76237	Putative diguanylate cyclase YeaJ	yeaJ	sp|P76237|DGCJ_ECOLI Probable diguanylate cyclase DgcJ OS=Escherichia coli (strain K12) OX=83333 GN=dgcJ PE=1 SV=2	13	13	0.156149	0.740832	0.809417	0.0438568	0.0341738	0.696718	0.978015	0.988872	0.996625	0.752711	0.846656	0.960597	0.367128	0.495668	0.816809	0.275572	0.310014	1.22856	38960980	51594990	56557980	35785990	41526020	40570980	46927020	43236990	49667990	35313000	32053000	54738000	63491040	47297990	70205030	31.2	56.602	0	45.469
P0A6N4	P0A6N4	Elongation factor P	efp	sp|P0A6N4|EFP_ECOLI Elongation factor P OS=Escherichia coli (strain K12) OX=83333 GN=efp PE=1 SV=2	6	6	0.156183	0.739571	1.10528	0.00102913	0.00195719	1.48735	0.0190371	0.0201496	1.37213	0.0149717	0.0176963	1.38903	0.0429489	0.0584365	1.43766	0.0479907	0.0666404	1.34231	172069900	168499900	150370100	178510100	169779900	194239900	197859900	241940100	244080100	219460000	294829900	200220000	200449900	265540000	198099900	34.6	20.591	0	127.02
P07014	P07014	Succinate dehydrogenase iron-sulfur subunit	sdhB	sp|P07014|SDHB_ECOLI Succinate dehydrogenase iron-sulfur subunit OS=Escherichia coli (strain K12) OX=83333 GN=sdhB PE=1 SV=1	14	14	0.156273	0.738605	0.904431	0.0174335	0.0167456	0.827397	0.00405338	0.00733884	0.723301	0.276262	0.260287	0.934577	0.00265254	0.0039798	0.718104	0.030923	0.0457061	0.786639	1249799000	1324700000	1229300000	1271901000	1069500000	1106901000	1074500000	1246300000	1240600000	949460400	832860200	953079900	886069800	1128601000	990680300	55	26.77	0	155.95
P0AES2;Q46915	P0AES2	Glucarate dehydratase	gudD	sp|P0AES2|GUDD_ECOLI Glucarate dehydratase OS=Escherichia coli (strain K12) OX=83333 GN=gudD PE=1 SV=2	9	9	0.156523	0.73858	0.932909	0.160794	0.114455	0.91862	0.102237	0.0812484	1.21282	0.0115719	0.0137161	0.690462	0.0719744	0.0965089	0.648887	0.0135111	0.0229545	1.14085	52959990	58221000	57876040	55255980	51466020	50950010	42384020	33259010	41670990	42144980	25776020	44882010	63744030	65024030	63929030	25.3	49.14	0	19.21
P0AGB6	P0AGB6	ECF RNA polymerase sigma-E factor	rpoE	sp|P0AGB6|RPOE_ECOLI ECF RNA polymerase sigma-E factor OS=Escherichia coli (strain K12) OX=83333 GN=rpoE PE=1 SV=1	7	7	0.157521	0.74188	1.08883	0.0156722	0.0159771	1.24962	0.0124828	0.0152658	1.53121	0.599888	0.696771	1.03769	0.470404	0.643158	1.21567	0.0327479	0.0486206	1.4566	48699030	46730020	54399000	54048020	56139980	52665970	47573990	52021980	55892990	45194970	97711990	50364010	58530020	79337990	82388000	44.5	21.695	0	23.86
P0ADE6	P0ADE6	Uncharacterized protein YgaU	ygaU	sp|P0ADE6|KBP_ECOLI Potassium binding protein Kbp OS=Escherichia coli (strain K12) OX=83333 GN=kbp PE=1 SV=2	21	21	0.157939	0.74279	1.18482	0.000286443	0	2.57591	0.00229613	0.00614286	2.94805	9.62758e-05	0.00159091	2.6388	0.354955	0.469962	1.42564	0.00604778	0.0155214	2.44564	4763000000	4346205000	3928502000	5869103000	4444205000	5185703000	11093000000	11165010000	12065000000	4687994000	12024010000	4180297000	9308207000	14537000000	8791293000	96.6	16.063	0	323.31
P0AGG2	P0AGG2	Acyl-CoA thioesterase 2	tesB	sp|P0AGG2|TESB_ECOLI Acyl-CoA thioesterase 2 OS=Escherichia coli (strain K12) OX=83333 GN=tesB PE=1 SV=2	8	8	0.158128	0.742	1.16276	0.00223138	0.00302772	2.11043	0.000481493	0.0035508	2.35342	0.226322	0.206771	1.19435	0.407841	0.562724	1.20415	0.00344778	0.0140812	2.01573	47078020	59439030	59311000	65273040	67571010	59156020	74384980	54186960	70151960	52001010	95326020	58458020	117570000	122860000	94105010	31.1	31.966	0	74.232
P45748	P45748	Threonylcarbamoyl-AMP synthase	tsaC	sp|P45748|TSAC_ECOLI Threonylcarbamoyl-AMP synthase OS=Escherichia coli (strain K12) OX=83333 GN=tsaC PE=1 SV=2	6	6	0.158457	0.741876	1.12138	0.00231945	0.00353586	1.32527	0.000898126	0.00381395	1.37753	0.00322558	0.00541235	0.751198	0.916932	0.965541	1.02177	0.010082	0.0204116	1.50285	39355000	36069990	40178020	41895980	39808010	48221980	27602000	28559990	30668990	35537010	56930980	30071990	49360980	60295010	65045010	37.4	20.767	0	29.042
P0CF70;P0CF69;P0CF68;P0CF67;P0CF66	P0CF70;P0CF69;P0CF68;P0CF67;P0CF66	Transposase InsE for insertion sequence IS3E;Transposase InsE for insertion sequence IS3D;Transposase InsE for insertion sequence IS3C;Transposase InsE for insertion sequence IS3B;Transposase InsE for insertion sequence IS3A	insE5;insE4;insE3;insE2;insE1	sp|P0CF70|INSE5_ECOLI Transposase InsE for insertion sequence IS3E OS=Escherichia coli (strain K12) OX=83333 GN=insE5 PE=3 SV=1;sp|P0CF69|INSE4_ECOLI Transposase InsE for insertion sequence IS3D OS=Escherichia coli (strain K12) OX=83333 GN=insE4 PE=3 SV=1;	4	4	0.158792	0.741752	0.846522	0.0584552	0.04255	1.2671	0.221108	0.186451	1.23385	0.715051	0.815145	1.06522	0.0832904	0.111724	1.25597	0.0173169	0.0287246	1.77317	18497990	17854010	15494000	17103000	13359000	13586000	14255000	18008000	24094010	18374000	22898010	24097000	36918980	32917010	23474990	38.4	11.543	0	4.6239
P69423	P69423	Sec-independent protein translocase protein TatC	tatC	sp|P69423|TATC_ECOLI Sec-independent protein translocase protein TatC OS=Escherichia coli (strain K12) OX=83333 GN=tatC PE=1 SV=2	1	1	0.160797	0.746334	0.804817	0.294546	0.24037	1.11669	0.0430474	0.0395253	0.600319	0.349146	0.349404	0.921623	0.172661	0.211879	1.27505	0.121425	0.142168	0.710919	19135000	23368990	19041000	14236000	20250010	15397000	19023990	19950000	17562000	21163000	25199990	33095010	14970000	10841990	18848990	6.6	28.876	0	20.553
P0A7S3	P0A7S3	30S ribosomal protein S12	rpsL	sp|P0A7S3|RS12_ECOLI 30S ribosomal protein S12 OS=Escherichia coli (strain K12) OX=83333 GN=rpsL PE=1 SV=2	8	8	0.160911	0.74495	0.737573	0.778059	0.858593	0.94363	0.0398076	0.0368388	0.550778	0.11376	0.0964812	0.709203	0.435767	0.59901	0.744036	0.757116	0.840378	0.947106	345500100	566069800	536790000	369430000	386190200	295260100	382590200	311060100	314670200	616509900	217399900	322629800	458600000	478919800	406089700	58.9	13.737	0	78.838
P23893	P23893	Glutamate-1-semialdehyde 2,1-aminomutase	hemL	sp|P23893|GSA_ECOLI Glutamate-1-semialdehyde 2,1-aminomutase OS=Escherichia coli (strain K12) OX=83333 GN=hemL PE=1 SV=2	12	12	0.161197	0.745157	0.91205	0.0164281	0.0163768	0.822942	0.0135962	0.0157881	0.804043	0.199076	0.178826	1.08891	0.975626	0.988274	1.0053	0.726154	0.817887	1.02334	285379900	313619800	332579900	286000100	267130200	295590100	360080000	323549900	329879800	387810100	230070100	338949800	328760000	291549900	332810000	37.3	45.366	0	119.27
P00893	P00893	Acetolactate synthase isozyme 3 large subunit	ilvI	sp|P00893|ILVI_ECOLI Acetolactate synthase isozyme 3 large subunit OS=Escherichia coli (strain K12) OX=83333 GN=ilvI PE=1 SV=2	18	18	0.161659	0.745309	0.922133	0.000175839	0	0.631214	0.000839568	0.00360159	0.669777	0.00025559	0.00189928	0.484295	0.632381	0.80829	0.880228	0.246628	0.27556	0.863207	297730000	280150000	313570100	261130100	292609800	268400000	158560000	135300000	138480100	334620200	160209900	332729900	249720100	217260000	310070100	35.2	62.984	0	117.14
P07813	P07813	Leucine--tRNA ligase	leuS	sp|P07813|SYL_ECOLI Leucine--tRNA ligase OS=Escherichia coli (strain K12) OX=83333 GN=leuS PE=1 SV=2	47	47	0.161868	0.744345	0.923974	0.0364687	0.0302165	0.838062	0.196488	0.161678	0.909735	0.376788	0.387942	1.04184	0.910918	0.963664	1.03396	0.636601	0.7448	0.980961	1273999000	1436401000	1404399000	1316299000	1199300000	1284200000	1462800000	1375900000	1444000000	1794201000	813940200	1945300000	1348201000	1323601000	1359500000	56.2	97.233	0	323.31
P36553	P36553	Oxygen-dependent coproporphyrinogen-III oxidase	hemF	sp|P36553|HEM6_ECOLI Oxygen-dependent coproporphyrinogen-III oxidase OS=Escherichia coli (strain K12) OX=83333 GN=hemF PE=1 SV=1	3	3	0.161881	0.742661	1.60338	0.0396876	0.0317953	0.436244	0.587551	0.665884	0.774718	0.695743	0.79689	1.13303	0.0152671	0.027913	3.2851	0.427546	0.500148	0.782253	3593900	1533401	1657400	3619898	3359798	3095602	2832801	2484700	1887500	5547302	7437004	7849001	1464501	1799401	1659101	14	34.322	0	6.911
P0AD96	P0AD96	Leu/Ile/Val-binding protein	livJ	sp|P0AD96|LIVJ_ECOLI Leu/Ile/Val-binding protein OS=Escherichia coli (strain K12) OX=83333 GN=livJ PE=1 SV=1	26	24	0.16267	0.746727	1.11939	0.0194552	0.0192596	0.794454	0.0085365	0.0112315	1.35922	0.027624	0.0275035	0.761752	0.0367698	0.0506781	0.438166	0.386786	0.445167	0.860996	4571399000	3904301000	3759898000	4605004000	4313598000	4738505000	2911200000	2958000000	3444602000	1413400000	2996099000	1333100000	3058699000	4648606000	3012400000	70	39.076	0	323.31
P0ABZ4	P0ABZ4	3-deoxy-D-manno-octulosonate 8-phosphate phosphatase KdsC	kdsC	sp|P0ABZ4|KDSC_ECOLI 3-deoxy-D-manno-octulosonate 8-phosphate phosphatase KdsC OS=Escherichia coli (strain K12) OX=83333 GN=kdsC PE=3 SV=1	1	1	0.162733	0.745045	0.707397	0.255246	0.196882	1.58242	0.0571935	0.0485267	2.19109	0.490504	0.546507	0.860812	0.0783761	0.104684	3.10048	0.139643	0.160449	1.49736	2677500	3944099	4167997	3154099	2596399	1902600	2714501	4017101	2574700	7198698	27469010	6634298	4824699	4170599	7343696	12.2	19.997	0	6.0019
P0A9Y6	P0A9Y6	Cold shock-like protein CspC	cspC	sp|P0A9Y6|CSPC_ECOLI Cold shock-like protein CspC OS=Escherichia coli (strain K12) OX=83333 GN=cspC PE=1 SV=2	4	4	0.163089	0.744674	1.17926	0.00288336	0.0043787	1.46284	0.000735371	0.00389655	1.9268	0.000666851	0.00189671	1.42342	0.788254	0.90789	1.05629	0.129699	0.150551	1.29766	1215501000	1200100000	1282300000	1728801000	1249300000	1420301000	1859300000	1674499000	1732700000	1188900000	1873300000	989829400	1384100000	2095600000	1409200000	78.3	7.4023	0	323.31
P09377	P09377	HTH-type transcriptional activator RhaS	rhaS	sp|P09377|RHAS_ECOLI HTH-type transcriptional activator RhaS OS=Escherichia coli (strain K12) OX=83333 GN=rhaS PE=1 SV=1	4	4	0.163215	0.744018	0.52206	0.00135649	0.00280423	4.43369	0.558037	0.625421	0.871358	0.965736	0.983946	0.988631	0.755009	0.888309	0.864986	0.944749	0.968079	1.01768	3122290	1978665	2191223	1609621	1940371	616715	2766067	3035094	1558118	1925017	1048776	4339516	2449115	1727005	3373387	15.8	32.315	0	5.3107
P07639	P07639	3-dehydroquinate synthase	aroB	sp|P07639|AROB_ECOLI 3-dehydroquinate synthase OS=Escherichia coli (strain K12) OX=83333 GN=aroB PE=1 SV=1	15	15	0.163418	0.743418	0.82654	0.73877	0.828266	1.04321	0.96221	0.978962	0.994736	0.161834	0.140289	0.835349	0.589095	0.776021	0.893094	0.869359	0.922806	1.02149	300680100	223009900	218700000	220299900	191290000	196499900	196499900	210190100	206969900	218470000	164890000	289989900	234730000	284199900	234309900	57.5	38.881	0	117.57
P0A9J6	P0A9J6	Ribokinase	rbsK	sp|P0A9J6|RBSK_ECOLI Ribokinase OS=Escherichia coli (strain K12) OX=83333 GN=rbsK PE=1 SV=1	13	13	0.163471	0.741759	1.10042	0.00836993	0.00882591	0.711892	0.0239448	0.0245258	0.765152	0.00279646	0.00569351	0.630074	0.0091314	0.0170833	0.710802	0.0212118	0.0328955	0.793368	75150950	65545000	78976000	80322040	79407040	81274020	42655020	46070020	49517000	47395010	55024020	53571030	54634040	59625020	59635030	48.9	32.29	0	158.69
P21369	P21369	Pyrazinamidase/nicotinamidase	pncA	sp|P21369|PNCA_ECOLI Nicotinamidase OS=Escherichia coli (strain K12) OX=83333 GN=pncA PE=1 SV=1	2	2	0.163605	0.740837	1.12433	0.970953	0.987101	0.995146	0.484048	0.519912	1.17874	0.54386	0.627492	0.932207	0.512296	0.696331	1.12786	0.613461	0.722262	0.928944	11100000	9484406	9210704	10678990	10770010	11983000	10991990	8668895	8243704	10785000	14886990	8664999	10886000	7260702	9834405	9.4	23.362	0.00051151	3.7971
P30137	P30137	Thiamine-phosphate synthase	thiE	sp|P30137|THIE_ECOLI Thiamine-phosphate synthase OS=Escherichia coli (strain K12) OX=83333 GN=thiE PE=1 SV=1	9	9	0.164571	0.744444	0.917125	0.00064486	0.00247104	0.529231	0.0188386	0.0196856	0.585217	0.000356635	0.00166038	0.481249	0.077257	0.10463	0.74427	0.295946	0.330538	0.913723	85964000	92206940	101740000	87517030	83280960	85353030	41248990	47662000	45719020	58900990	86510000	65248960	87152060	76287040	92531050	67.3	23.015	0	64.617
P0AF18	P0AF18	N-acetylglucosamine-6-phosphate deacetylase	nagA	sp|P0AF18|NAGA_ECOLI N-acetylglucosamine-6-phosphate deacetylase OS=Escherichia coli (strain K12) OX=83333 GN=nagA PE=1 SV=1	9	9	0.164604	0.743237	1.16882	0.0309566	0.0262933	1.23058	0.499378	0.542872	0.90494	0.318381	0.308975	1.07532	0.499195	0.679267	0.918996	0.236751	0.263202	1.10834	129410000	139510000	152270000	139850000	176320100	178020100	138350000	159059900	155330100	153380000	107139900	129840000	142980000	151080100	173270000	31.7	40.949	0	34.91
P23173	P23173	Low affinity tryptophan permease	tnaB	sp|P23173|TNAB_ECOLI Low affinity tryptophan permease OS=Escherichia coli (strain K12) OX=83333 GN=tnaB PE=1 SV=1	1	1	0.164748	0.741903	0.71001	0.0110242	0.0113085	0.38773	0.0212075	0.022369	0.497351	0.000809253	0.00231489	0.147611	0.0264006	0.0411203	0.20452	0.36562	0.420228	1.30016	9636699	16135990	14581000	8101398	11988000	8356000	2177500	2278200	1470000	6337791	1963182	1558901	19062000	11514000	22704000	3.4	45.21	0	26.249
P0ABD3	P0ABD3	Bacterioferritin	bfr	sp|P0ABD3|BFR_ECOLI Bacterioferritin OS=Escherichia coli (strain K12) OX=83333 GN=bfr PE=1 SV=1	12	12	0.164897	0.742172	1.17567	0.000130159	0	1.50751	0.00304697	0.00707765	1.94533	0.0184606	0.020176	1.20601	0.430129	0.590745	0.693102	0.0934919	0.111782	1.22344	1342500000	1251600000	1315400000	1844500000	1387801000	1403100000	1469199000	1707300000	1545601000	561629900	2075601000	631300400	1451601000	1906399000	1462600000	84.2	18.495	0	323.31
P21865	P21865	Sensor protein KdpD	kdpD	sp|P21865|KDPD_ECOLI Sensor protein KdpD OS=Escherichia coli (strain K12) OX=83333 GN=kdpD PE=1 SV=2	12	12	0.165066	0.74163	0.895568	0.771206	0.854648	1.02338	0.761391	0.836573	1.02163	0.00108912	0.00299625	0.800775	0.130665	0.163013	0.780321	0.377561	0.43315	1.10223	59356970	58229010	56118980	49234990	58752990	48162980	46517970	44654020	47947990	48045010	35211000	54477020	61575970	55081010	76581000	16	98.717	0	18.476
P0AFF2	P0AFF2	Nucleoside permease NupC	nupC	sp|P0AFF2|NUPC_ECOLI Nucleoside permease NupC OS=Escherichia coli (strain K12) OX=83333 GN=nupC PE=1 SV=1	4	4	0.166226	0.745785	0.839778	0.0024164	0.00349896	0.55872	0.0144563	0.016339	0.53426	0.127405	0.107605	1.07689	0.00312484	0.00508756	0.704266	0.000630103	0.00598291	0.543378	96643980	107700000	99656020	72108990	101260000	84131980	104490000	111660000	111030000	65990970	77036020	71273030	49873020	55548970	60070000	9	43.475	0	9.2622
P28304	P28304	Quinone oxidoreductase 1	qorA	sp|P28304|QOR1_ECOLI Quinone oxidoreductase 1 OS=Escherichia coli (strain K12) OX=83333 GN=qorA PE=1 SV=1	20	20	0.166485	0.744667	1.11317	0.00953327	0.0100852	1.40232	0.203292	0.168885	1.09886	0.00365413	0.00646588	1.39597	0.194286	0.235355	0.918341	0.00678562	0.0152086	1.5166	1280501000	1520200000	1363801000	1647799000	1439800000	1543499000	1857300000	2002899000	1941400000	1221900000	1276999000	1317699000	1949999000	2383601000	1992401000	72.5	35.172	0	323.31
P76291	P76291	tRNA (mo5U34)-methyltransferase	cmoB	sp|P76291|CMOB_ECOLI tRNA U34 carboxymethyltransferase OS=Escherichia coli (strain K12) OX=83333 GN=cmoB PE=1 SV=1	9	9	0.166705	0.743615	0.840619	0.979461	0.990083	0.995465	0.918174	0.952503	1.02927	0.258343	0.240699	0.878858	0.379259	0.514969	0.85685	0.105209	0.12388	1.52839	9454197	7016096	8434202	6518603	7731396	6594004	7063096	7910098	6797403	8941296	6895703	5708202	8729597	15500000	14761990	31.9	37.006	0	8.2388
P0A7A2	P0A7A2	Probable phosphoglycerate mutase GpmB	gpmB	sp|P0A7A2|GPMB_ECOLI Probable phosphoglycerate mutase GpmB OS=Escherichia coli (strain K12) OX=83333 GN=gpmB PE=3 SV=1	10	10	0.166722	0.741991	0.917437	1.67931e-05	0	0.612639	0.0392996	0.036627	0.83712	0.120788	0.102452	0.845846	0.122616	0.154224	1.15788	0.00365662	0.0136774	0.671352	123770100	126970000	121170000	106430000	110350100	125200100	89353040	118830000	108530100	157990000	124120100	150739900	84748990	92002980	73897040	43.3	24.065	0	40.017
P69490	P69490	Cytochrome c-type biogenesis protein CcmE	ccmE	sp|P69490|CCME_ECOLI Cytochrome c-type biogenesis protein CcmE OS=Escherichia coli (strain K12) OX=83333 GN=ccmE PE=1 SV=1	3	3	0.167104	0.742301	1.1295	0.0309207	0.0263182	1.25776	0.20353	0.169027	1.16394	0.296942	0.28471	0.9113	0.128661	0.162146	1.26391	0.209985	0.233923	0.925173	10122000	10592000	10444000	10612000	13454000	11301000	9393696	10839000	8322802	10710000	16321990	12933000	9646195	10461000	8787204	22.6	17.698	0	5.6742
P61714	P61714	6,7-dimethyl-8-ribityllumazine synthase	ribE	sp|P61714|RISB_ECOLI 6,7-dimethyl-8-ribityllumazine synthase OS=Escherichia coli (strain K12) OX=83333 GN=ribE PE=1 SV=1	8	8	0.167752	0.743635	1.09805	0.000820457	0.00216216	1.69889	0.0418955	0.03826	1.68499	0.0284831	0.0283484	1.58943	0.101499	0.132216	1.94548	0.0090132	0.0195211	1.74738	257540100	281720000	262300000	321740000	286379900	273449800	368029900	556320100	373230200	333620100	950680100	441830000	372980100	543859800	500550100	87.8	16.156	0	323.31
Q57261	Q57261	tRNA pseudouridine synthase D	truD	sp|Q57261|TRUD_ECOLI tRNA pseudouridine synthase D OS=Escherichia coli (strain K12) OX=83333 GN=truD PE=1 SV=1	15	15	0.16785	0.742325	1.11858	0.0397019	0.0317668	1.2285	0.061868	0.052557	1.36293	0.0995247	0.0839899	1.11078	0.890638	0.953799	0.988057	0.0244951	0.0367157	1.21252	84832950	98443950	93098940	106920000	93047020	109379900	99332960	100309900	106940000	96565940	79074000	98216970	118789900	106050000	110020000	57	39.091	0	69.073
P0A705	P0A705	Translation initiation factor IF-2	infB	sp|P0A705|IF2_ECOLI Translation initiation factor IF-2 OS=Escherichia coli (strain K12) OX=83333 GN=infB PE=1 SV=1	56	56	0.168174	0.742182	0.904376	0.000142604	0	0.600483	0.00556664	0.00852844	0.722126	0.000136736	0.00141414	0.62755	0.0987913	0.128738	0.573024	0.0609055	0.0783875	0.820019	1805799000	1709900000	1744099000	1430900000	1746799000	1593700000	1161199000	1055701000	1085700000	1281100000	598069900	1322500000	1633501000	1259700000	1443099000	63	97.349	0	323.31
P39401	P39401	Phosphoglycerol transferase I	mdoB	sp|P39401|OPGB_ECOLI Phosphoglycerol transferase I OS=Escherichia coli (strain K12) OX=83333 GN=mdoB PE=3 SV=2	5	5	0.168603	0.741002	0.81515	0.025538	0.0238028	0.442365	0.34566	0.323353	0.885568	0.0645387	0.0572334	0.747896	0.281457	0.352099	0.563497	0.00994045	0.0207364	0.608426	8414499	6559598	8731202	5507898	7316997	6476999	5443303	5476001	6763599	1810825	6053960	7865705	4884999	4260898	5214800	6.7	85.493	0	4.1151
P25714	P25714	Membrane protein insertase YidC	yidC	sp|P25714|YIDC_ECOLI Membrane protein insertase YidC OS=Escherichia coli (strain K12) OX=83333 GN=yidC PE=1 SV=2	20	20	0.169609	0.741629	0.890992	0.295213	0.240964	0.937312	0.689511	0.775899	0.978014	0.70667	0.807762	0.982419	0.0987162	0.128753	0.784989	0.949113	0.96944	0.995516	366899900	374010200	421520000	378970100	342949800	314800000	375179900	382220100	382460300	251679900	308080200	360850100	352760000	385760100	419369900	48.9	61.525	0	224.51
P69808	P69808	Fructose-like phosphotransferase enzyme IIB component 1	fryB	sp|P69808|PTFB1_ECOLI PTS system fructose-like EIIB component 1 OS=Escherichia coli (strain K12) OX=83333 GN=fryB PE=1 SV=1	1	1	0.169989	0.741454	0.513937	0.230762	0.173133	1.80248	0.505597	0.552606	1.42746	0.829076	0.900835	0.88897	0.801861	0.914682	0.908916	0.647751	0.752723	1.27635	6057971	2526584	1904410	1448915	1192983	2289145	2596001	1472825	5355836	2779701	3191997	2466790	1949765	5303939	5860645	11.1	11.735	0.0033445	2.2577
P76541	P76541	Ethanolamine utilization protein EutL	eutL	sp|P76541|EUTL_ECOLI Ethanolamine utilization protein EutL OS=Escherichia coli (strain K12) OX=83333 GN=eutL PE=1 SV=1	4	4	0.170075	0.740592	1.08054	0.0639611	0.04642	1.11152	0.0700018	0.0576536	1.23106	0.261436	0.243422	0.939323	0.830092	0.928855	1.05938	0.140691	0.161575	1.12071	29693010	27200000	30581980	30733000	30347010	33411010	28868010	27484020	25801010	26244980	50335980	22228990	30739010	36141020	31295010	22.8	22.788	0	12.456
P37329	P37329	Molybdate-binding periplasmic protein	modA	sp|P37329|MODA_ECOLI Molybdate-binding protein ModA OS=Escherichia coli (strain K12) OX=83333 GN=modA PE=1 SV=1	19	19	0.170578	0.740574	1.15387	0.00213532	0.00308696	0.697225	1.9988e-05	0	4.32062	2.43124e-05	0	0.547407	0.00285911	0.00415385	6.75795	0.590049	0.696641	1.07378	257310000	255660000	271720000	338669800	256480000	316140100	140310000	148679900	140549900	1527200000	3104200000	1163700000	241430200	356000200	257479800	70	27.364	0	311.65
P16659	P16659	Proline--tRNA ligase	proS	sp|P16659|SYP_ECOLI Proline--tRNA ligase OS=Escherichia coli (strain K12) OX=83333 GN=proS PE=1 SV=4	33	33	0.171151	0.740966	1.02617	0.0010383	0.00193939	1.37438	0.00141576	0.00588162	1.33579	0.0585215	0.0536276	1.07083	0.493467	0.67286	1.0587	0.0148402	0.0253029	1.22984	911479900	952179500	911179900	954759800	939210500	952940100	1007001000	948710100	1016399000	1054300000	843750200	1054900000	1041201000	1229599000	1148999000	73.6	63.692	0	323.31
P07118	P07118	Valine--tRNA ligase	valS	sp|P07118|SYV_ECOLI Valine--tRNA ligase OS=Escherichia coli (strain K12) OX=83333 GN=valS PE=1 SV=2	53	53	0.171157	0.739386	1.02723	0.405008	0.377554	0.963347	0.0299604	0.0290882	0.911147	0.743013	0.83884	1.00429	0.624073	0.804703	0.897764	0.697564	0.79857	0.987314	974159600	984990100	993290200	989850300	1041000000	1002599000	969220200	990050600	1006100000	1035901000	590040300	1128299000	965650400	925480500	1026400000	57.6	108.19	0	323.31
P75952	P75952	HTH-type transcriptional repressor ComR	comR	sp|P75952|COMR_ECOLI HTH-type transcriptional repressor ComR OS=Escherichia coli (strain K12) OX=83333 GN=comR PE=1 SV=2	3	3	0.17171	0.739387	2.11365	0.00629904	0.00667068	7.40238	0.149891	0.117171	3.53819	0.207988	0.187419	2.90385	0.0914791	0.120015	3.41507	0.150351	0.170396	2.37509	611353	2147819	1533590	1662210	2973512	3847155	1099442	7128199	6291699	6923500	6067597	1909209	5163300	2962455	1763835	14.8	23.361	0.0037736	2.094
P00861	P00861	Diaminopimelate decarboxylase	lysA	sp|P00861|DCDA_ECOLI Diaminopimelate decarboxylase OS=Escherichia coli (strain K12) OX=83333 GN=lysA PE=1 SV=1	9	9	0.171727	0.737817	1.50532	0.833592	0.902295	1.05907	0.75494	0.830455	0.91951	0.747596	0.842682	1.08995	0.593177	0.777957	0.842764	0.556072	0.655815	1.19764	23905000	15738000	10243000	23390010	24769010	22689000	18861010	15992000	16543000	15166000	9513000	15988010	14746000	18847000	23819000	32.6	46.177	0	56.105
P0AEF8	P0AEF8	Dipeptide transport system permease protein DppB	dppB	sp|P0AEF8|DPPB_ECOLI Dipeptide transport system permease protein DppB OS=Escherichia coli (strain K12) OX=83333 GN=dppB PE=1 SV=1	2	2	0.172387	0.737907	0.681363	0.00363316	0.0048913	0.296729	0.0226058	0.0235367	0.294024	0.000863738	0.00286192	0.451601	0.021033	0.0357271	0.382067	0.00619845	0.0152179	0.418439	11043000	10860000	13506000	5888301	12268990	7092197	5847503	4840198	5270798	2721698	5516402	6016801	4880603	3805502	6389304	6.8	37.497	0.0009828	2.7314
P0AC02	P0AC02	Outer membrane protein assembly factor BamD	bamD	sp|P0AC02|BAMD_ECOLI Outer membrane protein assembly factor BamD OS=Escherichia coli (strain K12) OX=83333 GN=bamD PE=1 SV=1	14	14	0.172759	0.738292	1.07522	0.201615	0.146993	1.09449	0.28957	0.260514	1.12137	0.933013	0.969073	0.992902	0.37504	0.509606	1.5562	0.0758819	0.0915792	1.24619	356830000	363620100	333920200	388190200	352080200	394060200	308690100	400140000	343349900	395060100	1311999000	315029800	368379900	494830300	459990000	64.5	27.829	0	236.19
P52007	P52007	Protein YecM	yecM	sp|P52007|YECM_ECOLI Protein YecM OS=Escherichia coli (strain K12) OX=83333 GN=yecM PE=1 SV=3	5	5	0.172808	0.736734	1.24199	0.021686	0.0208765	1.48403	0.00515986	0.00870857	2.0792	0.301372	0.289691	1.1795	0.173545	0.212545	1.39314	0.158759	0.18075	1.45827	7336302	5727804	5581900	8972795	6411499	7811103	6795696	6294503	8998098	7000105	12315000	7356796	6182003	12239010	9613603	39.4	21.205	0	12.251
P0AF59	P0AF59	Uncharacterized protein YjdI	yjdI	sp|P0AF59|YJDI_ECOLI Uncharacterized protein YjdI OS=Escherichia coli (strain K12) OX=83333 GN=yjdI PE=4 SV=1	1	1	0.173229	0.738206	1.21423	0.0113276	0.0114257	1.93439	0.00212113	0.00640426	2.50673	0.539553	0.619978	0.899607	0.655172	0.825726	1.12143	0.00113225	0.00966038	2.61113	4419901	3585002	5011898	5232403	5831900	4658999	3742100	4863598	3176798	3548101	7330097	4306402	10235000	10970000	12592000	14.5	8.5498	0.0069573	1.8775
P37671	P37671	HTH-type transcriptional regulator YiaJ	yiaJ	sp|P37671|YIAJ_ECOLI DNA-binding transcriptional repressor YiaJ OS=Escherichia coli (strain K12) OX=83333 GN=yiaJ PE=1 SV=1	4	4	0.174979	0.746546	1.19974	0.00376816	0.00481283	1.90931	0.0381149	0.0356593	1.48574	0.00712274	0.00940037	1.58998	0.0381455	0.0519798	1.55405	0.342798	0.390083	1.118	5424302	7355298	6417597	6838904	7508700	8610504	9626295	10448000	10233000	11947000	8033203	10013000	6418301	7193304	7749899	14.2	31.066	0	4.3712
P08997	P08997	Malate synthase A	aceB	sp|P08997|MASY_ECOLI Malate synthase A OS=Escherichia coli (strain K12) OX=83333 GN=aceB PE=1 SV=1	39	39	0.175001	0.744981	0.883807	0.644315	0.73479	0.977557	0.00286983	0.00724819	1.08659	0.0933457	0.0798877	0.947386	0.0025625	0.00406186	1.65879	0.480988	0.562372	0.949396	12810020000	13014010000	13103990000	13248020000	10317000000	11034000000	12851000000	11851010000	12196990000	24080980000	18665010000	22184010000	11517000000	14073010000	11534010000	72.8	60.273	0	323.31
P25397	P25397	Tellurite methyltransferase	tehB	sp|P25397|TEHB_ECOLI Tellurite methyltransferase OS=Escherichia coli (strain K12) OX=83333 GN=tehB PE=1 SV=1	11	11	0.175006	0.743423	1.10727	0.0352469	0.029155	1.22343	0.0533499	0.0461792	1.11828	1.14086e-05	0	1.81073	0.00233035	0.00362842	1.40991	0.114001	0.132728	1.13335	99808050	99378020	106320000	120950100	100480000	117800000	185230000	183080000	184620000	156980000	137240000	137190100	102959900	119580000	124690000	57.4	22.53	0	154.27
P0AB35	P0AB35	Uncharacterized protein YcfJ	ycfJ	sp|P0AB35|YCFJ_ECOLI Uncharacterized protein YcfJ OS=Escherichia coli (strain K12) OX=83333 GN=ycfJ PE=4 SV=1	1	1	0.175358	0.743474	1.95325	0.00743454	0.00797737	2.69246	0.0350977	0.0332154	2.16399	0.247708	0.228988	1.63087	0.241865	0.301225	2.28623	0.142545	0.16202	1.79363	993586	979366	1313053	4504013	1791508	1180017	2469870	880927	2547302	1308833	1432400	8144085	2007210	1128582	3254655	7.8	18.92	0.0037683	2.0861
P0A763	P0A763	Nucleoside diphosphate kinase	ndk	sp|P0A763|NDK_ECOLI Nucleoside diphosphate kinase OS=Escherichia coli (strain K12) OX=83333 GN=ndk PE=1 SV=2	8	8	0.175393	0.741925	1.09867	0.039156	0.0314054	0.842361	0.00816792	0.0112357	0.720433	0.00024699	0.00197015	1.83944	0.00971963	0.0180231	1.70707	0.0160633	0.0273915	0.675369	499909900	585460400	568620000	613169800	570139800	631320400	1010500000	1028200000	996900200	826660000	1155101000	866999400	317390100	425179800	379900200	65.7	15.463	0	323.31
P24203	P24203	Uncharacterized GTP-binding protein YjiA	yjiA	sp|P24203|YJIA_ECOLI P-loop guanosine triphosphatase YjiA OS=Escherichia coli (strain K12) OX=83333 GN=yjiA PE=1 SV=3	8	8	0.175691	0.741256	0.806285	0.411893	0.386812	0.885206	0.148297	0.116119	0.750956	0.526954	0.599796	0.898956	0.684715	0.845654	1.0998	0.438571	0.510849	0.882229	77685990	50617000	56559020	49128030	46551010	50974000	64495010	50781020	49332010	88947940	48472990	68618980	61295990	49082000	50761020	24.5	35.659	0	45.055
Q46845	Q46845	Disulfide-bond oxidoreductase YghU	yghU	sp|Q46845|YGHU_ECOLI Disulfide-bond oxidoreductase YghU OS=Escherichia coli (strain K12) OX=83333 GN=yghU PE=1 SV=2	17	17	0.176518	0.745402	0.833233	0.0337598	0.0277877	0.673529	0.137185	0.10695	0.743273	0.0688853	0.05966	0.759557	0.00733257	0.0152656	0.478204	0.0152797	0.0264453	0.616898	1101000000	915369700	749469600	747770200	765209800	763640300	684819500	688599900	701900000	362909800	501970200	453420200	589839800	582089900	516480100	52.1	32.391	0	323.31
P76208	P76208	Uncharacterized protein YniB	yniB	sp|P76208|YNIB_ECOLI Uncharacterized protein YniB OS=Escherichia coli (strain K12) OX=83333 GN=yniB PE=4 SV=1	3	3	0.176562	0.743859	1.09104	0.059923	0.0431027	1.1016	0.464927	0.490807	1.10389	0.780924	0.869154	0.92641	0.216648	0.264561	1.35737	0.787497	0.861015	0.956717	8132702	8968300	8789098	10249990	8859000	9168704	5029402	12135000	8351096	8353603	17023010	11274000	7584697	6696697	11052000	10.7	20.367	0	4.4436
P0A7L3	P0A7L3	50S ribosomal protein L20	rplT	sp|P0A7L3|RL20_ECOLI 50S ribosomal protein L20 OS=Escherichia coli (strain K12) OX=83333 GN=rplT PE=1 SV=2	9	9	0.17658	0.742736	1.09049	0.00152025	0.00269036	1.86638	0.060542	0.0508306	1.40298	0.391236	0.405311	1.03541	0.262151	0.327173	0.830002	0.00531807	0.013397	1.94838	1101199000	1157199000	1190800000	1329900000	1297499000	1140400000	1137399000	1181999000	1252900000	904450400	770540500	1245000000	2793800000	1858000000	2162201000	43.2	13.497	0	41.734
P0AEX3	P0AEX3	Alpha-ketoglutarate permease	kgtP	sp|P0AEX3|KGTP_ECOLI Alpha-ketoglutarate permease OS=Escherichia coli (strain K12) OX=83333 GN=kgtP PE=1 SV=1	7	7	0.176931	0.742515	0.635894	0.235138	0.177715	0.597442	0.0786929	0.064917	0.406464	0.0512556	0.0469232	0.484334	0.00326448	0.00546606	0.122378	0.460199	0.535702	0.67422	1552301000	667559700	830230500	563000000	753089900	521750200	496290000	397539900	495429900	81007020	113050000	172180000	1448899000	386909800	470350200	17.1	47.052	0	87.644
P0A873	P0A873	tRNA (guanine-N(1)-)-methyltransferase	trmD	sp|P0A873|TRMD_ECOLI tRNA (guanine-N(1)-)-methyltransferase OS=Escherichia coli (strain K12) OX=83333 GN=trmD PE=1 SV=1	6	6	0.177027	0.741243	1.10795	0.00989884	0.0103397	1.41951	0.121392	0.0952101	1.37229	0.130931	0.110904	1.16708	0.0265183	0.0412677	1.32414	0.0609526	0.0782998	1.18412	37237020	42437000	45810010	45577980	45296000	47689990	43942000	49419020	52992000	54512030	50500030	61051990	46998980	50217000	50924020	30.6	28.422	0	22.617
P0AE67	P0AE67	Chemotaxis protein CheY	cheY	sp|P0AE67|CHEY_ECOLI Chemotaxis protein CheY OS=Escherichia coli (strain K12) OX=83333 GN=cheY PE=1 SV=2	1	1	0.177386	0.742086	1.27175	0.0341463	0.0282414	1.59236	0.257258	0.223725	1.36704	0.82289	0.898797	1.16681	0.0839135	0.111487	1.79807	0.0233578	0.0355355	1.84032	1394700	1938799	1909699	1813400	2302101	2544300	1408045	6952339	837983	3710591	1959417	4128877	2580101	3065298	4069599	8.5	14.097	0.0069832	1.9161
P05042	P05042	Fumarate hydratase class II	fumC	sp|P05042|FUMC_ECOLI Fumarate hydratase class II OS=Escherichia coli (strain K12) OX=83333 GN=fumC PE=1 SV=1	25	25	0.17739	0.740566	0.92996	2.81657e-05	0	0.587166	6.7403e-06	0	0.451226	1.03186e-06	0	0.408533	0.000390881	0.00468571	0.0742727	0.000434089	0.00555102	0.596528	3690102000	3773199000	3725198000	3770800000	3249500000	3404399000	1473000000	1556300000	1542700000	373960200	173619900	327310200	2034799000	2397599000	2256798000	66	50.488	0	323.31
P02925	P02925	D-ribose-binding periplasmic protein	rbsB	sp|P02925|RBSB_ECOLI Ribose import binding protein RbsB OS=Escherichia coli (strain K12) OX=83333 GN=rbsB PE=1 SV=1	17	17	0.177544	0.739419	1.1741	0.00425175	0.00498816	0.676895	0.743557	0.821411	0.958156	0.00255735	0.00568817	0.751061	0.433236	0.595062	0.732086	0.943443	0.967405	0.988011	5585206000	5789600000	5334698000	7162291000	5401794000	7216392000	3969800000	4474106000	4114800000	3040600000	8300691000	2681701000	4760696000	7540991000	4634296000	69.6	30.95	0	323.31
P06129	P06129	Vitamin B12 transporter BtuB	btuB	sp|P06129|BTUB_ECOLI Vitamin B12 transporter BtuB OS=Escherichia coli (strain K12) OX=83333 GN=btuB PE=1 SV=2	27	27	0.178098	0.740849	1.07205	0.157048	0.112242	0.915987	0.00101231	0.00353957	0.455652	0.00283572	0.00563496	0.745388	0.16755	0.206069	0.49806	0.00207798	0.0119643	0.461722	239500100	273150000	254340100	278860000	279210100	263299900	182540100	190260000	198410000	89002990	289320100	79833040	113419900	142929900	101030000	63.2	68.406	0	236.49
P60438	P60438	50S ribosomal protein L3	rplC	sp|P60438|RL3_ECOLI 50S ribosomal protein L3 OS=Escherichia coli (strain K12) OX=83333 GN=rplC PE=1 SV=1	13	13	0.178462	0.740855	0.892301	0.00446809	0.00510413	0.703875	0.0174808	0.0189136	0.751565	0.00627567	0.00827907	0.721986	0.0504854	0.0690983	0.623442	0.427657	0.499891	0.928056	2504399000	2193599000	2044699000	1945200000	2149199000	1908901000	1673101000	1600700000	1578499000	1707699000	1017700000	1566199000	2284500000	1858101000	2115201000	54.5	22.243	0	140.86
P06966	P06966	HTH-type transcriptional regulator DicA	dicA	sp|P06966|DICA_ECOLI HTH-type transcriptional regulator DicA OS=Escherichia coli (strain K12) OX=83333 GN=dicA PE=4 SV=1	3	3	0.179428	0.74448	1.1279	0.00404752	0.00464716	1.38925	0.00749332	0.0102397	1.58972	0.000685481	0.00185321	1.63667	0.0725334	0.0976327	1.43265	0.706418	0.802102	1.05888	18798000	18305990	16135990	20357010	17944000	21811010	27859990	29102000	30024990	28292000	30075010	19189010	18092000	23996000	15185000	18.5	15.656	0.00051308	3.8393
P31828	P31828	Probable zinc protease PqqL	pqqL	sp|P31828|PQQL_ECOLI Probable zinc protease PqqL OS=Escherichia coli (strain K12) OX=83333 GN=pqqL PE=1 SV=2	4	4	0.180692	0.74783	3.25909	0.47323	0.477549	1.78221	0.499133	0.542719	0.458127	0.43289	0.462823	1.99795	0.380364	0.517251	2.25283	0.794401	0.866255	1.22535	3702892	42276010	22326010	51047030	50892990	46570030	25376010	56054020	19596010	29838020	70575980	18976010	18209990	19737010	17891010	3.9	104.66	0	4.2049
P33219	P33219	Protein YebF	yebF	sp|P33219|YEBF_ECOLI Protein YebF OS=Escherichia coli (strain K12) OX=83333 GN=yebF PE=1 SV=2	6	6	0.180884	0.74681	0.892259	0.452734	0.445628	1.18205	0.220424	0.185594	1.28954	0.0167661	0.0184429	0.731192	0.529469	0.714736	1.20362	0.339428	0.385125	1.19648	242510100	215050100	231630000	230679900	197340000	188500100	192960100	153120100	159830000	189240000	462770200	240520000	200920100	298110100	345449900	32.2	12.962	0	38.385
P31473	P31473	ATPase RavA	ravA	sp|P31473|RAVA_ECOLI ATPase RavA OS=Escherichia coli (strain K12) OX=83333 GN=ravA PE=1 SV=2	17	17	0.181006	0.745859	1.08973	0.00134728	0.00281167	1.59253	0.000615267	0.00319231	1.6772	0.141806	0.120827	1.1302	0.651753	0.824143	0.898619	0.00279729	0.0148871	1.47348	103870000	122950000	115710000	119930000	128410000	124170000	133169900	117670000	136140000	121090100	66934040	132300100	177790100	167420100	158820000	39.2	56.388	0	105.86
P76100	P76100	Uncharacterized acetyltransferase YdcK	ydcK	sp|P76100|YDCK_ECOLI Uncharacterized acetyltransferase YdcK OS=Escherichia coli (strain K12) OX=83333 GN=ydcK PE=3 SV=1	4	4	0.181085	0.744589	0.531975	0.0492388	0.0373562	0.64721	0.0274246	0.0264572	1.73562	0.114229	0.0968333	1.28186	0.0172915	0.03021	1.9191	0.00591973	0.0146322	0.478031	6103400	6725604	8039599	5427200	1713236	5343402	8892196	10390000	7523805	13832000	16665000	10119000	2714601	4003501	3317101	12.9	35.849	0	6.6277
Q46798	Q46798	Uncharacterized lipoprotein YgeR	ygeR	sp|Q46798|YGER_ECOLI Uncharacterized lipoprotein YgeR OS=Escherichia coli (strain K12) OX=83333 GN=ygeR PE=3 SV=2	8	8	0.181287	0.744419	1.12115	0.00903637	0.0093634	1.71061	0.0390272	0.0364139	1.28799	0.00517644	0.00819087	1.51968	0.227558	0.281078	1.70442	0.0609764	0.0782123	1.37504	43765980	47959020	39522990	51906970	50116000	44941030	60164020	67745970	71431980	56120980	154850100	47265980	51582030	74254010	56309980	35.9	26.564	0	49.924
P0AGD3	P0AGD3	Superoxide dismutase [Fe]	sodB	sp|P0AGD3|SODF_ECOLI Superoxide dismutase [Fe] OS=Escherichia coli (strain K12) OX=83333 GN=sodB PE=1 SV=2	7	7	0.182173	0.746683	1.05223	0.754503	0.841188	1.02313	0.106372	0.0837046	0.805122	0.000311653	0.00177181	1.53422	0.00722815	0.0153663	2.29115	0.000241925	0.00388235	0.735475	325010100	347980100	328070000	363180000	335729800	354519800	531559800	482370300	522569700	620820300	1053300000	682429900	249460100	239400100	247169900	44.6	21.265	0	115.46
P21151	P21151	3-ketoacyl-CoA thiolase	fadA	sp|P21151|FADA_ECOLI 3-ketoacyl-CoA thiolase FadA OS=Escherichia coli (strain K12) OX=83333 GN=fadA PE=1 SV=3	11	11	0.182895	0.748248	0.934166	0.00798568	0.0085097	1.43697	0.882493	0.928306	1.00897	0.0231361	0.0242594	1.26131	0.642461	0.816182	1.12053	0.030307	0.0447731	1.15512	335600200	367749800	380350000	338939900	324790200	347620100	475100000	484140000	409510000	454810000	262140100	553940000	434860200	413890000	401979900	36.7	40.876	0	111.59
P31434	P31434	Alpha-xylosidase	yicI	sp|P31434|XYLS_ECOLI Alpha-xylosidase OS=Escherichia coli (strain K12) OX=83333 GN=yicI PE=1 SV=2	12	12	0.183155	0.747664	0.905004	0.00243078	0.00348441	0.644287	0.0173527	0.018665	0.682272	0.0336737	0.0320798	0.739468	0.186082	0.225445	0.658532	0.00127573	0.010135	0.591723	76480020	88303980	88929950	71379970	81394990	76622010	71689980	54087980	62629010	57455960	35018990	85245000	54279030	47263980	48502990	17.9	88.078	0	39.107
P23331	P23331	Thymidine kinase	tdk	sp|P23331|KITH_ECOLI Thymidine kinase OS=Escherichia coli (strain K12) OX=83333 GN=tdk PE=3 SV=1	6	6	0.184142	0.751872	0.819441	0.0604607	0.0434389	0.670806	0.0939801	0.074232	0.76174	0.0645181	0.0572871	1.39513	0.090657	0.118995	1.39237	0.0252495	0.0378612	0.613566	27042990	35260980	39975980	25434020	29869000	27609990	52676970	42327010	46425020	49443010	38979990	53391010	23563010	17882000	20897010	41	23.456	0	35.408
P0A9B6	P0A9B6	D-erythrose-4-phosphate dehydrogenase	epd	sp|P0A9B6|E4PD_ECOLI D-erythrose-4-phosphate dehydrogenase OS=Escherichia coli (strain K12) OX=83333 GN=epd PE=1 SV=2	7	7	0.184847	0.753833	0.951901	0.157165	0.11216	0.869342	0.0170664	0.0183383	0.788002	0.0680199	0.058804	0.791295	0.172657	0.212079	1.05707	0.0185712	0.0300777	0.808401	14181990	14639010	14402990	12990000	14372010	13815000	13199990	11726000	9571802	14290010	15856000	15588000	12992000	10976010	11078000	25.7	37.299	0	9.3682
P0A7U3	P0A7U3	30S ribosomal protein S19	rpsS	sp|P0A7U3|RS19_ECOLI 30S ribosomal protein S19 OS=Escherichia coli (strain K12) OX=83333 GN=rpsS PE=1 SV=2	6	6	0.186269	0.757336	1.18696	0.00125797	0.00213699	1.6948	0.00844787	0.0112848	1.88675	0.00476697	0.00788136	1.48614	0.260029	0.324019	1.28531	0.0154704	0.0262472	1.59497	984520100	874509800	794780400	1240100000	924530300	998089700	1319500000	1234099000	1379301000	842089800	1573301000	1096700000	1408099000	1661700000	1186600000	68.5	10.43	0	44.271
P0AEB7	P0AEB7	RutC family protein YoaB	yoaB	sp|P0AEB7|YOAB_ECOLI RutC family protein YoaB OS=Escherichia coli (strain K12) OX=83333 GN=yoaB PE=3 SV=1	5	5	0.186678	0.757206	0.809119	0.00957236	0.0100592	0.497902	0.256327	0.223024	0.855539	0.00152919	0.00305195	0.478066	0.721753	0.867501	0.850949	0.017899	0.0291521	0.319554	42270980	38400000	52903030	29869990	37207000	40928980	21422010	20552990	21310010	22854010	84957980	27252020	16681010	8181900	20530990	40.4	12.493	0	69.699
P0ABZ6	P0ABZ6	Chaperone SurA	surA	sp|P0ABZ6|SURA_ECOLI Chaperone SurA OS=Escherichia coli (strain K12) OX=83333 GN=surA PE=1 SV=1	22	22	0.18704	0.756182	1.0809	0.0616774	0.0441663	1.13499	0.000890198	0.00384375	1.5593	0.240059	0.221148	0.90911	0.445573	0.612039	1.16	0.0253045	0.0383082	1.2407	669790100	584740200	577340400	664170400	643560000	668070000	521940000	531919700	611950200	676689900	965530400	540200100	698189600	788520500	784419600	61	47.283	0	323.31
P0ACR4	P0ACR4	Uncharacterized HTH-type transcriptional regulator YeiE	yeiE	sp|P0ACR4|YEIE_ECOLI Uncharacterized HTH-type transcriptional regulator YeiE OS=Escherichia coli (strain K12) OX=83333 GN=yeiE PE=3 SV=1	3	3	0.187579	0.757881	0.825279	0.291316	0.236651	1.22546	0.675854	0.763291	1.08193	0.0777231	0.0660567	1.24392	0.0172026	0.0303486	1.43959	0.99127	0.994301	1.0025	4766598	4290003	5533399	4465101	3298798	4317901	5385800	6288597	6430302	7053801	6278803	7622101	3465102	4734999	6948204	16	32.723	0	18.058
P0AG00	P0AG00	Lipopolysaccharide biosynthesis protein WzzE	wzzE	sp|P0AG00|WZZE_ECOLI ECA polysaccharide chain length modulation protein OS=Escherichia coli (strain K12) OX=83333 GN=wzzE PE=1 SV=2	12	12	0.187593	0.756387	1.05398	5.25272e-05	0	2.3287	0.000131101	0.00123404	2.19306	8.08719e-06	0	2.18975	0.078515	0.105163	1.53268	0.00175741	0.0100792	1.57949	26820990	27073000	27688990	27635990	27899980	30531000	56976010	62134990	59631000	32406020	59279020	37682980	45570980	45715990	38029020	46.8	39.489	0	55.083
P0A8L1	P0A8L1	Serine--tRNA ligase	serS	sp|P0A8L1|SYS_ECOLI Serine--tRNA ligase OS=Escherichia coli (strain K12) OX=83333 GN=serS PE=1 SV=1	27	27	0.187882	0.756551	0.950818	0.000645815	0.00246154	0.849873	0.0150345	0.0173196	0.805784	0.00623834	0.00829515	0.878337	0.908948	0.962901	0.980871	0.421494	0.49162	1.03321	742270100	773970000	770969500	684179700	744060300	747889800	642350400	683950000	683140300	865430500	545219800	885840200	794769800	739580300	831120100	70.2	48.413	0	180.7
P0A6T3	P0A6T3	Galactokinase	galK	sp|P0A6T3|GAL1_ECOLI Galactokinase OS=Escherichia coli (strain K12) OX=83333 GN=galK PE=1 SV=2	9	9	0.188164	0.75688	0.811007	0.00464195	0.00501299	0.555466	0.000156644	0.00105455	0.262157	0.448407	0.484604	0.910925	0.000139313	0.00173913	0.22049	0.000449316	0.00544	0.347596	228059900	306999800	266530100	247760100	177099900	226860000	244950000	271010000	212480000	58749030	52426990	64944990	83291980	96810980	97192000	28.3	41.442	0	99.334
P55135	P55135	23S rRNA (uracil(1939)-C(5))-methyltransferase RlmD	rlmD	sp|P55135|RLMD_ECOLI 23S rRNA (uracil(1939)-C(5))-methyltransferase RlmD OS=Escherichia coli (strain K12) OX=83333 GN=rlmD PE=1 SV=3	3	3	0.188173	0.755396	0.656336	0.156341	0.111967	0.710378	0.726043	0.808476	0.863946	0.266028	0.248844	0.777138	0.151513	0.18751	0.550919	0.283481	0.317663	0.775787	2629201	4014000	2068599	2567202	1748100	1375401	2089036	2165901	2264582	2272301	1777151	903960	2067801	1991201	2475601	9.5	48.052	0.0051426	1.993
P68767	P68767	Cytosol aminopeptidase	pepA	sp|P68767|AMPA_ECOLI Cytosol aminopeptidase OS=Escherichia coli (strain K12) OX=83333 GN=pepA PE=1 SV=1	19	19	0.188229	0.753918	1.09144	0.869256	0.927816	1.01107	0.40965	0.409999	0.940638	0.0528095	0.0486574	1.21795	0.0562784	0.0749408	1.66315	0.580653	0.685234	1.0356	433260200	496360200	519860200	523660300	533629900	520170200	560540200	558559800	645130000	689550100	1153401000	646669600	485450100	518890000	492940000	46.7	54.879	0	147.53
P37440	P37440	Oxidoreductase UcpA	ucpA	sp|P37440|UCPA_ECOLI Oxidoreductase UcpA OS=Escherichia coli (strain K12) OX=83333 GN=ucpA PE=1 SV=3	10	10	0.188405	0.753992	1.18126	5.59132e-06	0	0.101698	0.00397655	0.0074	0.00492044	0.00605259	0.00839293	0.573504	0.000438582	0.00437333	0.0526281	0.00451701	0.013172	0.0145562	194470100	213529900	246800000	293970000	223520000	257080200	106970000	130070100	138940000	7138498	18017000	11615000	732180	6452000	6690901	46.8	27.85	0	34.099
P0ACW6	P0ACW6	Uncharacterized protein YdcH	ydcH	sp|P0ACW6|YDCH_ECOLI Uncharacterized protein YdcH OS=Escherichia coli (strain K12) OX=83333 GN=ydcH PE=4 SV=2	8	8	0.188673	0.753926	0.676247	0.000303684	0	0.197876	0.00313398	0.00699535	0.0371618	0.0359946	0.033961	0.732332	0.00554052	0.0103521	0.0462683	0.0101248	0.0203661	0.0421632	633830100	500280100	454200100	542539800	250520000	327699900	371749900	389660300	390499800	26783000	8841905	60239000	53908000	34675990	5775000	68.9	8.8782	0	13.388
P0AAS3	P0AAS3	Inner membrane protein YbbJ	ybbJ	sp|P0AAS3|YBBJ_ECOLI Inner membrane protein YbbJ OS=Escherichia coli (strain K12) OX=83333 GN=ybbJ PE=1 SV=2	2	2	0.188972	0.75449	1.83622	0.798341	0.872628	1.18324	0.0443108	0.0404444	0.309373	0.868042	0.927828	0.931289	0.115392	0.148385	0.414894	0.0400687	0.057601	0.297616	3879871	3009275	10474000	10082890	8951704	8388298	4964561	5534328	3595007	2161795	2926482	1380516	1885645	1456149	1174071	11.8	16.939	0.0065268	1.9413
P75863	P75863	Uncharacterized protein YcbX	ycbX	sp|P75863|YCBX_ECOLI Uncharacterized protein YcbX OS=Escherichia coli (strain K12) OX=83333 GN=ycbX PE=1 SV=1	15	15	0.189035	0.75374	0.938511	0.316078	0.26446	1.026	0.56139	0.631098	0.979621	0.00611702	0.00836008	0.874995	0.878491	0.947405	0.978668	0.183114	0.207968	0.899746	113850100	110200000	109430000	108490000	108259900	96630050	95640980	94652020	101600000	130780000	84257980	116790000	88081050	104390100	108760000	53.9	40.644	0	47.445
P0AB77	P0AB77	2-amino-3-ketobutyrate coenzyme A ligase	kbl	sp|P0AB77|KBL_ECOLI 2-amino-3-ketobutyrate coenzyme A ligase OS=Escherichia coli (strain K12) OX=83333 GN=kbl PE=1 SV=1	10	10	0.18921	0.752744	0.890113	0.330874	0.281476	1.109	0.163316	0.130888	1.06523	0.000630557	0.00198039	1.43975	0.0433022	0.0584351	1.32025	0.00669114	0.014957	1.5084	61766020	67144010	61573040	63104000	49912010	57177030	88554980	95890020	89747050	90717010	69871970	92708970	83018010	98890980	106750000	35.7	43.117	0	23.612
P06999	P06999	ATP-dependent 6-phosphofructokinase isozyme 2	pfkB	sp|P06999|PFKB_ECOLI ATP-dependent 6-phosphofructokinase isozyme 2 OS=Escherichia coli (strain K12) OX=83333 GN=pfkB PE=1 SV=2	14	14	0.189326	0.751923	1.0875	0.00310529	0.00477692	1.44893	0.162699	0.130511	1.08678	0.000235628	0.00204651	2.06473	0.000128161	0.00181818	2.26847	0.261365	0.292289	1.05994	284639800	297680000	330080000	326570200	349249900	315379900	624200300	588100300	670620300	650830300	683239700	734210400	316789800	324800100	323680000	62.1	32.456	0	186.99
P0A7B5	P0A7B5	Glutamate 5-kinase	proB	sp|P0A7B5|PROB_ECOLI Glutamate 5-kinase OS=Escherichia coli (strain K12) OX=83333 GN=proB PE=1 SV=1	18	18	0.189588	0.752425	1.08158	0.465478	0.466532	1.06862	0.0616807	0.0524712	1.15629	0.0414003	0.0398228	0.857513	0.200069	0.242987	0.888611	0.0175753	0.0285694	1.35013	296400200	350969900	324350000	343399900	354279900	350910100	270659800	286750100	274130000	285800100	259610000	319089900	388959700	474980100	449479800	55	39.056	0	148.76
P04968	P04968	L-threonine dehydratase biosynthetic IlvA	ilvA	sp|P04968|ILVA_ECOLI L-threonine dehydratase biosynthetic IlvA OS=Escherichia coli (strain K12) OX=83333 GN=ilvA PE=1 SV=1	15	15	0.190088	0.753056	0.860207	0.00260038	0.00393509	0.509962	0.00383503	0.00752542	0.389245	0.00377313	0.0063907	0.515141	0.0443685	0.0600899	0.373936	0.885485	0.934293	0.967337	39170980	36337980	49015020	33900000	37720020	34728980	23492000	21464990	18913990	18701000	8122000	24017010	42814010	27468000	53700010	39.9	56.195	0	24.806
P76015	P76015	PTS-dependent dihydroxyacetone kinase, dihydroxyacetone-binding subunit DhaK	dhaK	sp|P76015|DHAK_ECOLI PEP-dependent dihydroxyacetone kinase, dihydroxyacetone-binding subunit DhaK OS=Escherichia coli (strain K12) OX=83333 GN=dhaK PE=1 SV=2	14	14	0.190226	0.752546	0.969211	0.000694058	0.00235294	0.807933	0.0505492	0.0444342	1.09387	5.8424e-05	0.0021875	0.709022	0.471232	0.644375	0.969674	0.738339	0.825227	1.01103	329990100	336740200	319349900	310700000	321750200	323189900	233870100	227999900	237210100	341999900	309459900	305709800	323750100	323390000	350280200	56.2	38.215	0	323.31
P0A7P5	P0A7P5	50S ribosomal protein L34	rpmH	sp|P0A7P5|RL34_ECOLI 50S ribosomal protein L34 OS=Escherichia coli (strain K12) OX=83333 GN=rpmH PE=1 SV=1	2	2	0.190432	0.752269	1.22166	0.0130064	0.013311	1.6923	0.044921	0.0407276	1.28955	0.4361	0.467237	0.949838	0.101007	0.13166	0.757657	0.0204834	0.031973	1.65346	763340500	648050100	732969900	1096900000	747850200	805910500	661349900	723599600	649279900	464960200	686590000	493989700	1039400000	1516701000	1039700000	19.6	5.3803	0.00098184	2.7104
P0AA43	P0AA43	Ribosomal small subunit pseudouridine synthase A	rsuA	sp|P0AA43|RSUA_ECOLI Ribosomal small subunit pseudouridine synthase A OS=Escherichia coli (strain K12) OX=83333 GN=rsuA PE=1 SV=1	9	9	0.191987	0.760766	1.08356	0.0404484	0.0319536	0.848507	0.0141386	0.0160627	0.810395	0.0777522	0.0659982	0.892395	0.498529	0.678386	1.09779	0.121114	0.142039	1.09463	71678990	77790000	83912030	84934960	80452980	87111050	67481020	71334020	69077010	102980000	68824960	87337990	86169950	84154000	84626940	62.8	25.865	0	45.762
P0AFG8	P0AFG8	Pyruvate dehydrogenase E1 component	aceE	sp|P0AFG8|ODP1_ECOLI Pyruvate dehydrogenase E1 component OS=Escherichia coli (strain K12) OX=83333 GN=aceE PE=1 SV=2	60	60	0.192034	0.759457	1.04419	0.0254878	0.0237273	0.855986	0.000536887	0.00340513	0.886245	0.111077	0.0943402	0.936817	0.142741	0.17449	0.748426	0.135612	0.156765	1.09899	8609900000	8301504000	8548606000	8932704000	9213711000	8452295000	7727910000	7701392000	8440793000	7326192000	4625506000	7558899000	8744994000	10276000000	9025106000	68.3	99.667	0	323.31
P38489	P38489	Oxygen-insensitive NAD(P)H nitroreductase	nfsB	sp|P38489|NFSB_ECOLI Oxygen-insensitive NAD(P)H nitroreductase OS=Escherichia coli (strain K12) OX=83333 GN=nfsB PE=1 SV=1	15	15	0.192469	0.760656	0.927799	0.000129174	0	0.565393	0.00654071	0.00931944	0.789272	0.0853889	0.0731029	0.880958	0.555033	0.739716	1.03771	0.00175871	0.0100296	0.777713	294659900	322530000	304319800	266489900	305899900	283350100	288690000	245640100	278840100	347710200	319060000	291310200	248540000	236600000	231349900	72.8	23.905	0	169.24
P77743	P77743	Propionate catabolism operon regulatory protein	prpR	sp|P77743|PRPR_ECOLI Propionate catabolism operon regulatory protein OS=Escherichia coli (strain K12) OX=83333 GN=prpR PE=1 SV=1	3	3	0.192751	0.760495	0.589644	0.555958	0.617074	0.684428	0.36962	0.353058	0.679791	0.640595	0.742049	1.29027	0.72021	0.866397	1.24827	0.767416	0.846901	1.16521	2070766	6140201	3881800	2082561	1790720	2713263	9878410	4206421	2551454	7601421	1742776	7246604	2445695	8517865	3748275	6.2	58.649	0.0037506	2.0458
P07004	P07004	Gamma-glutamyl phosphate reductase	proA	sp|P07004|PROA_ECOLI Gamma-glutamyl phosphate reductase OS=Escherichia coli (strain K12) OX=83333 GN=proA PE=1 SV=2	18	18	0.193038	0.760654	0.858631	0.00332078	0.00464299	0.669874	0.00357182	0.0071441	0.700604	0.000801724	0.00232479	0.549491	0.0166468	0.0289423	0.763541	0.50774	0.599031	0.946233	271879900	284260000	328540100	223770100	292880000	245250100	169510100	163610100	151900000	214119900	241430200	218639900	303200200	254799900	278450000	57.1	44.63	0	215.53
P04816	P04816	Leucine-specific-binding protein	livK	sp|P04816|LIVK_ECOLI Leucine-specific-binding protein OS=Escherichia coli (strain K12) OX=83333 GN=livK PE=1 SV=2	21	19	0.193118	0.759651	1.08009	0.127047	0.0888923	0.862424	0.448719	0.467555	1.09167	0.00882437	0.0110897	0.78747	0.842497	0.933791	0.967818	0.354307	0.405716	0.896174	880139900	987699900	874529500	1020900000	929760600	1009200000	700379700	764040200	693750000	749149600	1189700000	773260200	674770000	919859500	881559500	65	39.378	0	323.31
P0AB26	P0AB26	Uncharacterized lipoprotein YceB	yceB	sp|P0AB26|YCEB_ECOLI Uncharacterized lipoprotein YceB OS=Escherichia coli (strain K12) OX=83333 GN=yceB PE=1 SV=1	7	7	0.193353	0.758727	1.14425	0.00443688	0.00511258	1.93303	0.000168329	0.00102655	3.31693	0.0172557	0.019427	1.53777	0.312873	0.406832	1.93723	0.010437	0.02037	1.50341	24160990	18276010	19473000	24159010	23449990	22739000	27425000	33157980	34385010	22567990	123330000	22460000	29346990	30595000	32541990	52.7	20.5	0	54.324
P09029	P09029	N5-carboxyaminoimidazole ribonucleotide synthase	purK	sp|P09029|PURK_ECOLI N5-carboxyaminoimidazole ribonucleotide synthase OS=Escherichia coli (strain K12) OX=83333 GN=purK PE=1 SV=2	7	7	0.193448	0.757293	1.20682	0.00609497	0.00646201	1.52996	0.0364867	0.0341734	1.41256	0.000380198	0.00160976	2.5084	0.00268597	0.00394	2.0445	0.835799	0.898534	0.958198	21804010	26696000	20728010	32958990	24081010	26718990	55579970	61160000	56020020	53060980	40923020	47485010	21050990	30437980	16566000	17.5	39.461	0	8.3763
P33221	P33221	Phosphoribosylglycinamide formyltransferase 2	purT	sp|P33221|PURT_ECOLI Formate-dependent phosphoribosylglycinamide formyltransferase OS=Escherichia coli (strain K12) OX=83333 GN=purT PE=1 SV=3	15	15	0.193652	0.75674	0.845597	0.00169733	0.00258537	0.515941	0.00863079	0.0111264	0.643572	0.8696	0.928726	0.982736	0.845957	0.935113	1.03495	0.0134289	0.0228946	0.532284	142669900	153070100	190740000	120110000	145820000	143800100	170440000	160190000	144799900	198730000	126069900	184310100	90749040	67886020	101970000	39.5	42.433	0	54.417
P0AFH8	P0AFH8	Osmotically-inducible protein Y	osmY	sp|P0AFH8|OSMY_ECOLI Osmotically-inducible protein Y OS=Escherichia coli (strain K12) OX=83333 GN=osmY PE=1 SV=1	13	13	0.193861	0.756384	1.15023	3.13189e-06	0	5.19848	3.50985e-05	0	9.12533	4.37086e-06	0	2.9807	0.271883	0.340358	1.52852	0.000704574	0.0060625	5.16502	795390000	768010100	794550200	1059700000	778940400	894820100	2206899000	2414100000	2412601000	911749900	2330999000	815569900	3169901000	5674207000	3718202000	63.2	21.073	0	323.31
P0A993	P0A993	Fructose-1,6-bisphosphatase class 1	fbp	sp|P0A993|F16PA_ECOLI Fructose-1,6-bisphosphatase class 1 OS=Escherichia coli (strain K12) OX=83333 GN=fbp PE=1 SV=1	12	12	0.194525	0.757323	0.848149	0.00405651	0.00463918	0.530334	0.0337194	0.031729	0.694693	0.0800457	0.067993	0.779445	0.314594	0.40771	1.13023	0.00328196	0.0139321	0.503827	62333040	74160020	89726990	62225010	64633970	62921980	56217000	59957020	58271980	81779960	86706020	84453040	39827010	36487990	36502990	45.2	36.833	0	44.295
P67087	P67087	Ribosomal RNA small subunit methyltransferase I	rsmI	sp|P67087|RSMI_ECOLI Ribosomal RNA small subunit methyltransferase I OS=Escherichia coli (strain K12) OX=83333 GN=rsmI PE=1 SV=1	11	11	0.194962	0.758019	1.13107	0.0167218	0.0163094	1.45665	0.00603847	0.00916429	1.48386	0.0058628	0.00845941	1.45951	0.0268901	0.0411875	1.36747	0.00643595	0.0152022	1.48808	38864000	49053980	46040000	54163970	47838000	49015990	66357010	63592020	64667990	68410020	56507010	58061960	62920980	70040020	65629020	58.4	31.348	0	44.619
P31806	P31806	Bifunctional NAD(P)H-hydrate repair enzyme Nnr;ADP-dependent (S)-NAD(P)H-hydrate dehydratase;NAD(P)H-hydrate epimerase	nnr	sp|P31806|NNR_ECOLI Bifunctional NAD(P)H-hydrate repair enzyme Nnr OS=Escherichia coli (strain K12) OX=83333 GN=nnr PE=1 SV=2	14	14	0.194966	0.756599	0.917022	0.309852	0.257004	0.922718	0.0600617	0.0505432	1.15538	0.000317578	0.00176	0.515004	0.185351	0.224556	0.837368	0.375945	0.431046	0.898267	234000000	196869900	210240100	189480100	204850000	192420000	115350000	104960000	109270000	191170000	146839900	202579900	163249900	227000100	189430000	32.2	54.65	0	41.78
P75777	P75777	UPF0194 membrane protein YbhG	ybhG	sp|P75777|YBHG_ECOLI UPF0194 membrane protein YbhG OS=Escherichia coli (strain K12) OX=83333 GN=ybhG PE=2 SV=1	15	15	0.195121	0.755417	1.13488	0.0834158	0.0588858	1.1433	0.116998	0.092093	1.1807	0.137629	0.11743	1.10829	0.811204	0.922419	1.02522	0.510891	0.6027	1.03919	67257020	73325980	80815970	82576980	93432980	75505990	83884970	81597010	79267010	64129990	83358950	80339990	77199970	76498020	75738040	61.4	36.415	0	57.833
P09148	P09148	Galactose-1-phosphate uridylyltransferase	galT	sp|P09148|GAL7_ECOLI Galactose-1-phosphate uridylyltransferase OS=Escherichia coli (strain K12) OX=83333 GN=galT PE=1 SV=2	10	10	0.196158	0.757537	0.881689	0.00114474	0.00221591	0.445954	0.000173003	0.001	0.214718	0.107523	0.0916553	0.789555	4.7044e-05	0	0.210779	0.000204453	0.00447458	0.299261	120270000	150600100	143190000	129129900	123730000	111260100	90383970	120839900	116880000	30976980	26454000	29637980	36304990	44698020	42834000	27	39.645	0	33.242
P0C0L9	P0C0L9	Protein IscX	iscX	sp|P0C0L9|ISCX_ECOLI Protein IscX OS=Escherichia coli (strain K12) OX=83333 GN=iscX PE=1 SV=1	1	1	0.196291	0.756715	1.32998	0.00755251	0.00792135	1.6006	0.00745685	0.0101021	3.20183	0.225275	0.20533	1.25699	0.316524	0.410858	1.65666	0.063868	0.081533	2.25086	1158600	1017300	1142601	1885600	1037100	1620100	1081499	1839999	1344101	1004765	4307598	1414731	1319800	3402721	3419701	24.2	7.7315	0.0037933	2.1777
P0AF96	P0AF96	Toxin-antitoxin biofilm protein TabA	tabA	sp|P0AF96|TABA_ECOLI Toxin-antitoxin biofilm protein TabA OS=Escherichia coli (strain K12) OX=83333 GN=tabA PE=1 SV=1	12	12	0.196348	0.755569	0.836852	0.111247	0.07754	0.787428	0.252861	0.219049	0.859152	0.244321	0.225758	0.839668	0.624321	0.803904	0.926953	0.0943982	0.11353	0.764251	453070200	372389900	307980000	329879800	307739800	299980100	290959900	297530100	355340000	311180200	413630100	321540200	258040100	308050000	291800100	88	16.865	0	278.36
P39187	P39187	Uncharacterized protein YtfJ	ytfJ	sp|P39187|YTFJ_ECOLI Uncharacterized protein YtfJ OS=Escherichia coli (strain K12) OX=83333 GN=ytfJ PE=1 SV=1	8	8	0.196354	0.754167	1.17465	0.720256	0.812224	0.981375	0.00214645	0.00630366	2.13783	0.103639	0.0882402	1.15191	0.401145	0.552889	1.20915	0.141801	0.161707	1.20785	231570000	251470000	266469800	349090200	251170000	286839900	265380000	318209900	280859900	248800000	448310000	245940100	269360100	363939900	278930100	48.9	20.42	0	68.238
Q46925	Q46925	Cysteine desulfurase CsdA	csdA	sp|Q46925|CSDA_ECOLI Cysteine desulfurase CsdA OS=Escherichia coli (strain K12) OX=83333 GN=csdA PE=1 SV=1	11	11	0.197013	0.7548	0.8739	0.0289458	0.0258322	1.26704	0.0221812	0.0231178	1.34648	0.0752686	0.0636934	1.3416	0.16178	0.200301	1.74022	0.0543824	0.0721407	1.24824	50151980	60425000	61252980	48282970	45935980	55855980	90348960	78680960	63053960	82514990	184040000	64417040	64536040	76609960	73019980	32.2	43.234	0	15.447
P09833	P09833	Molybdenum import ATP-binding protein ModC	modC	sp|P09833|MODC_ECOLI Molybdenum import ATP-binding protein ModC OS=Escherichia coli (strain K12) OX=83333 GN=modC PE=3 SV=4	8	8	0.197774	0.757072	1.07964	0.030243	0.0262672	0.761191	0.0068818	0.00927919	1.33002	0.00415752	0.00747672	0.380883	0.0725292	0.0977657	1.56848	0.100601	0.118984	1.14422	16344000	15372010	16855010	18983990	16743000	16766000	4469200	7008003	7470796	28408010	17715000	32469020	17970000	17072010	20678010	22.2	39.102	0	9.5955
P75804	P75804	Soluble aldose sugar dehydrogenase YliI	yliI	sp|P75804|YLII_ECOLI Aldose sugar dehydrogenase YliI OS=Escherichia coli (strain K12) OX=83333 GN=yliI PE=1 SV=1	11	11	0.197915	0.756266	0.199529	0.780062	0.859679	0.79713	0.73363	0.815062	0.747134	0.775342	0.863978	0.782177	0.102646	0.132477	6.50301	0.171462	0.195664	0.253747	35989010	4032100	3484401	3789001	2799694	378630	3699799	9549000	6848703	46015000	122630100	24642020	1978801	3619199	1153497	44.2	41.054	0	19.256
P0AG93	P0AG93	Protein translocase subunit SecF	secF	sp|P0AG93|SECF_ECOLI Protein translocase subunit SecF OS=Escherichia coli (strain K12) OX=83333 GN=secF PE=1 SV=1	4	4	0.197936	0.754873	0.876201	0.00402542	0.00466321	0.738611	0.167227	0.134137	0.832341	0.26241	0.24419	0.850666	0.0372406	0.0508893	1.32511	0.597179	0.705546	0.936816	28497990	25091010	28726990	20731000	26207990	25432000	28512980	19072010	23252010	30895020	39396020	39267990	24628010	21904990	31304980	19.2	35.382	0	66.725
Q46851	Q46851	L-glyceraldehyde 3-phosphate reductase	gpr	sp|Q46851|GPR_ECOLI L-glyceraldehyde 3-phosphate reductase OS=Escherichia coli (strain K12) OX=83333 GN=gpr PE=1 SV=1	24	24	0.199358	0.760787	1.08144	3.07512e-05	0	0.366029	5.38358e-05	0	0.156674	0.119062	0.100896	0.886674	4.70502e-06	0	0.164528	4.14829e-06	0	0.197371	956800500	1114100000	983440400	1076400000	1077000000	1143699000	887069600	969420000	849800000	167209900	159620100	174930000	200400100	200070000	201030100	78	38.832	0	323.31
P19319	P19319	Respiratory nitrate reductase 2 alpha chain	narZ	sp|P19319|NARZ_ECOLI Respiratory nitrate reductase 2 alpha chain OS=Escherichia coli (strain K12) OX=83333 GN=narZ PE=1 SV=5	10	9	0.200101	0.761431	0.784182	0.332933	0.283928	0.839639	0.396235	0.391078	1.1796	0.00322662	0.00539901	0.186112	0.0183676	0.032045	0.199302	0.599327	0.706594	0.888741	7458499	10177000	12663000	7865299	8210399	7177601	1590404	2817901	1382600	920696	3364870	2456162	10402000	6662002	9736704	10.4	140.23	0	6.619
P37194	P37194	Outer membrane protein slp	slp	sp|P37194|SLP_ECOLI Outer membrane protein Slp OS=Escherichia coli (strain K12) OX=83333 GN=slp PE=1 SV=1	8	8	0.200257	0.760842	1.12751	1.2537e-06	0	17.8292	2.98504e-06	0	18.116	8.41102e-06	0	8.97866	0.831827	0.929601	1.1138	1.1624e-05	0	5.77614	50140980	48646010	41380020	53789970	47614010	56488040	385860000	453469900	417529900	36706980	131860000	28812990	268789900	282049900	256569800	59.6	20.964	0	187.47
P0A6T9	P0A6T9	Glycine cleavage system H protein	gcvH	sp|P0A6T9|GCSH_ECOLI Glycine cleavage system H protein OS=Escherichia coli (strain K12) OX=83333 GN=gcvH PE=1 SV=2	2	2	0.200449	0.760446	1.236	0.0838591	0.0590061	0.774119	0.944083	0.968585	0.984481	0.00741127	0.00940183	1.42966	0.356019	0.473556	1.43823	0.0287694	0.0433463	0.534795	181840100	218070000	206789900	301050000	195550100	263010100	263990000	309320000	293440000	230060100	571070000	185679900	75601980	134440100	123400000	7	13.811	0.0037843	2.116
P39310	P39310	Uncharacterized protein YtfB	ytfB	sp|P39310|YTFB_ECOLI Cell division protein YtfB OS=Escherichia coli (strain K12) OX=83333 GN=ytfB PE=3 SV=2	7	7	0.200456	0.759058	1.12643	0.0186719	0.0178776	1.36142	0.00591801	0.00899459	1.63064	0.738643	0.836466	0.974401	0.149557	0.185083	1.62036	0.0210736	0.0325676	1.35589	56382980	68394010	55298000	63384020	66595980	72202960	55348030	60116000	59292030	83385950	161269900	67463000	74728000	87960950	80867060	40.6	23.505	0	200.75
P15254	P15254	Phosphoribosylformylglycinamidine synthase	purL	sp|P15254|PUR4_ECOLI Phosphoribosylformylglycinamidine synthase OS=Escherichia coli (strain K12) OX=83333 GN=purL PE=1 SV=3	52	52	0.200635	0.757931	0.949064	0.00118612	0.00219718	0.768643	0.00262976	0.00723951	0.831932	0.328056	0.320912	1.03322	0.625586	0.803588	1.16143	0.199532	0.224606	0.891732	680899600	682439800	731109800	630039700	677740100	680119600	730780200	695950100	736790100	1006199000	462740300	1143101000	661250200	540210100	674380300	52.4	141.4	0	323.31
P0C960	P0C960	Endo-type membrane-bound lytic murein transglycosylase A	emtA	sp|P0C960|EMTA_ECOLI Endo-type membrane-bound lytic murein transglycosylase A OS=Escherichia coli (strain K12) OX=83333 GN=emtA PE=1 SV=1	3	3	0.200891	0.758058	1.1828	0.0103151	0.010512	1.13585	0.0473181	0.0428647	1.94393	0.00367239	0.0064507	0.773214	0.396726	0.544409	1.35556	0.0128627	0.0225122	1.14093	3790399	3618300	3735398	3597798	4501703	5234098	2706001	3098202	2824802	3002512	9054100	4694141	4057699	4460299	4204003	24.6	22.226	0.0092166	1.7623
P76459	P76459	Acetate CoA-transferase subunit beta	atoA	sp|P76459|ATOA_ECOLI Acetate CoA-transferase subunit beta OS=Escherichia coli (strain K12) OX=83333 GN=atoA PE=1 SV=1	1	1	0.200998	0.756682	2.20164	0.00694604	0.00694614	4.96733	0.0305715	0.0293983	3.13743	0.0150386	0.0178171	3.9849	0.134724	0.167112	2.55982	0.351053	0.400951	1.74928	732776	706559	1843310	962278	3583561	2953519	3200951	4953867	3808452	5514783	1625779	1785493	739150	2924962	2362881	5.1	22.959	0.0037951	2.1793
P23256	P23256	Protein MalY;Cystathionine beta-lyase MalY;Maltose regulon modulator	malY	sp|P23256|MALY_ECOLI Protein MalY OS=Escherichia coli (strain K12) OX=83333 GN=malY PE=1 SV=1	5	5	0.201414	0.757007	0.817608	0.0911771	0.0646976	0.796755	0.212583	0.178883	0.863145	0.741828	0.838814	1.04602	0.668294	0.832511	0.920977	0.834665	0.898144	0.946662	25631010	20208990	26892000	16467000	20030000	23081990	30187990	23503990	22469000	29523000	17351000	21242000	17758990	18463000	36041010	12.3	43.641	0	8.8338
P27838	P27838	Protein CyaY	cyaY	sp|P27838|CYAY_ECOLI Iron-sulfur cluster assembly protein CyaY OS=Escherichia coli (strain K12) OX=83333 GN=cyaY PE=1 SV=1	4	4	0.201926	0.759935	1.18628	0.00163158	0.00263682	2.17748	0.002501	0.00699749	2.38722	0.032237	0.031296	1.32496	0.46495	0.637619	1.16152	0.00681467	0.0150875	1.53076	22271000	25673980	29484000	33392990	32306010	26088000	35030010	31824020	35174990	23844990	41297990	26827010	39584020	40269000	37936020	38.7	12.231	0	8.693
P05804	P05804	Beta-glucuronidase	uidA	sp|P05804|BGLR_ECOLI Beta-glucuronidase OS=Escherichia coli (strain K12) OX=83333 GN=uidA PE=1 SV=2	14	14	0.202542	0.761148	0.848227	0.000120996	0	0.272898	0.00389639	0.00747789	0.539817	0.000811738	0.00230508	0.545209	0.0193945	0.0333538	0.464912	0.116673	0.136022	0.742986	82787950	88184050	101590000	65861010	89825030	76509950	50522000	46664020	50983970	47122980	28876980	54768980	77587970	51244000	76509050	30.2	68.446	0	29.192
P76034	P76034	Uncharacterized HTH-type transcriptional regulator YciT	yciT	sp|P76034|YCIT_ECOLI Uncharacterized HTH-type transcriptional regulator YciT OS=Escherichia coli (strain K12) OX=83333 GN=yciT PE=4 SV=1	12	12	0.203052	0.762025	0.91574	2.47715e-05	0	0.348761	0.000113359	0.00128889	0.418271	0.000275425	0.00188571	0.598608	0.182003	0.221275	0.709167	0.002822	0.0148273	0.524068	112120000	120860100	128190000	107780000	119580000	103500000	73124030	69422990	73398040	104969900	56070990	105260000	56990020	58088990	75524960	54.2	27.602	0	52.397
P00547	P00547	Homoserine kinase	thrB	sp|P00547|KHSE_ECOLI Homoserine kinase OS=Escherichia coli (strain K12) OX=83333 GN=thrB PE=1 SV=2	8	8	0.203423	0.761935	1.08333	0.00102286	0.00196319	1.7156	1.0222e-05	0	3.13537	0.000211177	0.00218182	1.98033	0.380432	0.517176	0.888613	0.00149449	0.0103607	2.06348	41340000	42194990	47201980	49094010	44165010	48279970	89816010	88314020	80615980	45824980	31246020	40348990	85427990	105730000	80092990	20.3	33.623	0	8.4717
P33362	P33362	Putative osmoprotectant uptake system substrate-binding protein OsmF	osmF	sp|P33362|YEHZ_ECOLI Glycine betaine-binding protein YehZ OS=Escherichia coli (strain K12) OX=83333 GN=yehZ PE=1 SV=1	13	13	0.204007	0.762679	1.18044	0.00713029	0.00736599	1.63689	0.00746484	0.0100855	1.96604	0.650117	0.751623	1.05013	0.182647	0.221882	1.56107	0.0167872	0.0277523	1.62499	415779900	399129800	323169900	501919800	386020300	455299700	384870100	446259900	361610000	476870200	997329900	428979800	512429900	707769600	634500000	49.5	32.609	0	323.31
P0AET2	P0AET2	Acid stress chaperone HdeB	hdeB	sp|P0AET2|HDEB_ECOLI Acid stress chaperone HdeB OS=Escherichia coli (strain K12) OX=83333 GN=hdeB PE=1 SV=1	4	4	0.204309	0.762165	0.470511	0.0849784	0.0599576	10.9605	0.000220641	0.000913386	49.1324	0.00112142	0.00294118	12.4978	0.0947027	0.123772	3.22309	0.770072	0.848891	1.49712	2868479	5518204	2011537	729234	1562169	2911335	35435020	44101990	39773020	10839000	21513000	4571993	1135666	57996980	1622168	51.9	12.043	0	161.85
P0AC33	P0AC33	Fumarate hydratase class I, aerobic	fumA	sp|P0AC33|FUMA_ECOLI Fumarate hydratase class I, aerobic OS=Escherichia coli (strain K12) OX=83333 GN=fumA PE=1 SV=2	31	22	0.204523	0.761088	0.885357	0.000202771	0	0.262734	0.000180119	0.000983051	0.0177647	0.0124704	0.0142935	1.42614	0.000362714	0.00482353	0.119033	2.62017e-06	0	0.0474694	910369500	1188100000	1078300000	951279800	894829600	950859800	1542899000	1423500000	1540301000	147220000	88584960	150830000	50899990	49814970	49201020	69.7	60.298	0	323.31
P32662	P32662	Phosphoglycolate phosphatase	gph	sp|P32662|GPH_ECOLI Phosphoglycolate phosphatase OS=Escherichia coli (strain K12) OX=83333 GN=gph PE=1 SV=1	7	7	0.204576	0.760121	1.17923	0.815906	0.887839	1.03847	0.0463393	0.0423862	1.35803	0.834194	0.90312	1.02554	0.10222	0.132211	1.54387	0.207696	0.231735	1.23225	40093010	36613000	28950000	43646020	37301020	42803990	32246990	36111980	39360980	54279030	73468030	39215020	37737980	52302030	40285990	42.9	27.389	0	44.312
P61316	P61316	Outer-membrane lipoprotein carrier protein	lolA	sp|P61316|LOLA_ECOLI Outer-membrane lipoprotein carrier protein OS=Escherichia coli (strain K12) OX=83333 GN=lolA PE=1 SV=1	11	11	0.204905	0.759643	1.17122	0.00066715	0.00241509	1.83704	0.00111795	0.00361775	2.62683	0.00292947	0.00557761	1.50358	0.12757	0.161629	1.86543	0.498478	0.587139	1.16298	154869900	189619900	165300100	223890000	168030100	207310000	247239900	264620100	252209900	276870100	579840200	196280000	179609900	285830000	148730000	76.8	22.497	0	318.5
P30864	P30864	Uncharacterized HTH-type transcriptional regulator YafC	yafC	sp|P30864|YAFC_ECOLI Uncharacterized HTH-type transcriptional regulator YafC OS=Escherichia coli (strain K12) OX=83333 GN=yafC PE=3 SV=1	9	9	0.205292	0.760726	1.1244	0.00655088	0.00684866	1.49779	0.00421147	0.00744828	1.45768	0.00561177	0.00864777	1.54906	0.184404	0.223985	1.27214	0.00795557	0.017396	1.5009	91546050	104010000	83484020	103240100	96938040	112910100	149740000	129999900	151790000	140030000	90093940	129719900	125290000	144620100	148330000	33.2	33.775	0	21.265
P38051	P38051	Isochorismate synthase MenF	menF	sp|P38051|MENF_ECOLI Isochorismate synthase MenF OS=Escherichia coli (strain K12) OX=83333 GN=menF PE=1 SV=4	5	5	0.205992	0.762828	0.844337	0.00917061	0.00975098	0.623838	0.988357	0.994026	0.997892	0.0628652	0.0566206	0.757645	0.606953	0.791351	1.05072	0.010022	0.0205034	0.610034	12765990	16536000	16463990	11170000	13078000	14321000	11517000	12862000	10204000	16687010	15526990	15560000	9651604	8131798	10053010	17.4	48.764	0	9.0983
P0AGF2	P0AGF2	Sulfur acceptor protein CsdE	csdE	sp|P0AGF2|CSDE_ECOLI Sulfur acceptor protein CsdE OS=Escherichia coli (strain K12) OX=83333 GN=csdE PE=1 SV=1	3	3	0.20634	0.762532	1.37026	0.099837	0.0698659	1.38983	0.0296866	0.0288443	1.51033	0.962296	0.983445	1.00473	0.547154	0.733193	1.15794	0.251677	0.281871	1.20661	2098278	2693399	2834198	2948299	5016399	2786401	2593901	2531801	2473799	2449300	4375499	2320499	2780800	3750600	2697900	31.3	15.94	0	4.0593
P0A8R9	P0A8R9	HTH-type transcriptional regulator HdfR	hdfR	sp|P0A8R9|HDFR_ECOLI HTH-type transcriptional regulator HdfR OS=Escherichia coli (strain K12) OX=83333 GN=hdfR PE=3 SV=1	6	6	0.206553	0.761508	1.07599	8.44288e-05	0	1.45979	0.0155331	0.0180154	1.48481	0.00315966	0.00548	1.59611	0.335491	0.440724	1.25669	4.65256e-05	0	1.48484	6452000	6106103	6114497	6119098	7048404	6957699	9565894	8980497	11402000	9812405	5160297	9441806	9056303	9279395	9384001	28	31.746	0	6.4221
P0AD05	P0AD05	Uncharacterized protein YecA	yecA	sp|P0AD05|YECA_ECOLI Uncharacterized protein YecA OS=Escherichia coli (strain K12) OX=83333 GN=yecA PE=4 SV=1	5	5	0.207752	0.765809	0.939353	0.000650436	0.00244275	1.35747	0.0256295	0.025667	1.77127	0.0450651	0.0426133	0.87073	0.0103597	0.0185618	1.1986	0.00546699	0.0136855	1.42971	35575980	36598000	33260990	31033010	33949020	34071010	30780010	32589000	28501000	43914010	39938000	42519000	47823020	46869970	56463020	37.6	25.039	0	47.525
P42620	P42620	Glutathionyl-hydroquinone reductase YqjG	yqjG	sp|P42620|YQJG_ECOLI Glutathionyl-hydroquinone reductase YqjG OS=Escherichia coli (strain K12) OX=83333 GN=yqjG PE=1 SV=1	17	17	0.20819	0.76649	1.0941	0.000189383	0	1.92011	0.00227849	0.00617436	1.75342	0.0716285	0.0615957	1.13982	0.00237014	0.00428261	0.745257	0.00432353	0.0134305	1.5784	261559900	302479900	273919900	331550000	290139800	295059900	325920200	297980000	330449900	207990000	207950100	207399900	402880100	500210000	422880300	63.7	37.386	0	323.31
P0AG27	P0AG27	Uncharacterized protein YibN	yibN	sp|P0AG27|YIBN_ECOLI Uncharacterized protein YibN OS=Escherichia coli (strain K12) OX=83333 GN=yibN PE=1 SV=1	8	8	0.208562	0.765563	1.05068	0.0140213	0.0145882	1.26661	0.00195215	0.00668889	1.71729	0.00431398	0.00766593	1.16343	0.0414412	0.0556903	1.19298	0.000563226	0.00636364	1.31108	119790000	125849900	119270100	131199900	131620000	120770000	145730000	142460000	136390000	133120000	161590000	141920100	152900000	163070000	162520100	60.1	15.596	0	242.7
P21693	P21693	ATP-dependent RNA helicase DbpA	dbpA	sp|P21693|DBPA_ECOLI ATP-dependent RNA helicase DbpA OS=Escherichia coli (strain K12) OX=83333 GN=dbpA PE=1 SV=2	2	2	0.208576	0.764218	1.2624	0.0179744	0.0172513	2.51514	0.0116217	0.013581	2.21031	0.00259989	0.00565775	2.67878	0.0182547	0.032009	2.7574	0.113379	0.131205	2.1452	1748001	2001301	1240409	2267101	1830021	2104184	4680898	4339901	4106003	4498901	3064399	6598801	7040423	2415799	2518620	4.6	49.187	0.0037647	2.0769
P77316	P77316	Uncharacterized zinc-type alcohol dehydrogenase-like protein YbdR	ybdR	sp|P77316|YBDR_ECOLI Uncharacterized zinc-type alcohol dehydrogenase-like protein YbdR OS=Escherichia coli (strain K12) OX=83333 GN=ybdR PE=3 SV=1	12	12	0.208581	0.762877	0.372746	0.0916119	0.0649058	3.0652	0.014497	0.0164688	8.10168	0.451916	0.490582	1.52711	0.670373	0.834476	1.32865	0.385315	0.443202	1.66823	26421000	5478804	6240701	1601401	6712404	4352398	16625000	13195000	14666010	14068990	6606596	22796010	20793010	16225990	12430990	43	44.175	0	16.482
P0A7D4	P0A7D4	Adenylosuccinate synthetase	purA	sp|P0A7D4|PURA_ECOLI Adenylosuccinate synthetase OS=Escherichia coli (strain K12) OX=83333 GN=purA PE=1 SV=2	34	34	0.209126	0.764455	1.03778	4.89838e-05	0	1.68945	0.00292913	0.0071619	1.19741	3.70392e-05	0	2.44104	0.0340149	0.0469097	1.82961	0.00153256	0.0101935	1.40191	3084702000	2911300000	3150798000	3183399000	3189001000	3115202000	7675107000	7774105000	6897808000	4983999000	8066598000	4310497000	3972599000	4483806000	4376800000	86.1	47.344	0	323.31
P0AEM9	P0AEM9	Cystine-binding periplasmic protein	fliY	sp|P0AEM9|TCYJ_ECOLI L-cystine-binding protein TcyJ OS=Escherichia coli (strain K12) OX=83333 GN=tcyJ PE=1 SV=1	26	26	0.210345	0.768573	1.10705	0.0167819	0.01643	1.18913	0.0119451	0.0144654	1.50647	0.00426664	0.00746018	1.23801	0.714188	0.863075	0.914294	0.00626897	0.0151755	1.54151	2958900000	2773001000	2929199000	3526401000	2824801000	3273500000	3414600000	3785700000	3527898000	2245299000	4130202000	1980800000	3809302000	4966700000	4653206000	84.2	29.039	0	323.31
P0AAV6	P0AAV6	Uncharacterized protein YbgS	ybgS	sp|P0AAV6|YBGS_ECOLI Uncharacterized protein YbgS OS=Escherichia coli (strain K12) OX=83333 GN=ybgS PE=3 SV=1	2	2	0.210888	0.76881	0.446823	0.023888	0.0220521	6.50004	0.409824	0.410016	2.1671	0.0334918	0.0320266	6.00581	0.0580654	0.0780204	3.73366	0.640286	0.746111	0.779736	1634395	8799597	2997027	2409082	1416603	1126727	12883000	33252980	21795990	13021000	11220000	15356000	2730908	2860731	2615589	11.9	12.872	0	6.6969
P0C037	P0C037	UPF0345 protein YaiE	yaiE	sp|P0C037|PPNP_ECOLI Pyrimidine/purine nucleoside phosphorylase OS=Escherichia coli (strain K12) OX=83333 GN=ppnP PE=1 SV=1	2	2	0.211228	0.768404	1.80739	0.122502	0.0855966	2.18754	0.132367	0.101935	2.12571	0.153	0.130273	2.01941	0.142089	0.174067	2.1657	0.192184	0.218036	1.87265	22482990	80376960	65840030	89929010	81965050	95302960	89497040	104070000	105200000	93405060	143970000	89873020	89304020	103679900	84387970	23.4	10.234	0	7.8229
P15288	P15288	Cytosol non-specific dipeptidase	pepD	sp|P15288|PEPD_ECOLI Cytosol non-specific dipeptidase OS=Escherichia coli (strain K12) OX=83333 GN=pepD PE=1 SV=3	21	21	0.211506	0.768111	1.08028	0.0394134	0.0315032	1.25873	0.000866937	0.00385882	1.50509	0.00274645	0.00555381	1.43414	0.00356181	0.00581034	1.82606	0.0292126	0.0439225	1.30434	861560500	990240400	865889500	962100200	944120600	1025300000	1230901000	1366900000	1295100000	1718001000	1397899000	1873000000	1043200000	1203500000	1305701000	45.8	52.915	0	323.31
P77581	P77581	Succinylornithine transaminase	astC	sp|P77581|ASTC_ECOLI Succinylornithine transaminase OS=Escherichia coli (strain K12) OX=83333 GN=astC PE=1 SV=1	16	16	0.212201	0.768583	0.934909	0.00495471	0.0055616	1.2327	0.0101745	0.0132217	0.754522	2.26008e-05	0	1.96153	0.0232017	0.0372402	1.37484	0.00190647	0.0106854	0.6162	472649800	489020000	486200300	467389700	475429900	413260100	898230100	987719500	955969800	678409700	563709800	763650400	265560000	296840200	333550000	50	43.665	0	74.247
P0A6J8	P0A6J8	D-alanine--D-alanine ligase A	ddlA	sp|P0A6J8|DDLA_ECOLI D-alanine--D-alanine ligase A OS=Escherichia coli (strain K12) OX=83333 GN=ddlA PE=3 SV=1	10	10	0.212843	0.770378	0.854086	0.00572414	0.00622222	0.585396	0.00377934	0.00725957	0.689843	0.0623829	0.0565627	0.819207	0.313022	0.406699	0.786503	0.00701611	0.0149291	0.614933	253790000	270890000	280780000	186960100	258880000	248479900	230670100	190750100	241189900	245800000	140300000	272330000	197730000	152100000	149250100	30.2	39.315	0	16.007
P0A9T0	P0A9T0	D-3-phosphoglycerate dehydrogenase	serA	sp|P0A9T0|SERA_ECOLI D-3-phosphoglycerate dehydrogenase OS=Escherichia coli (strain K12) OX=83333 GN=serA PE=1 SV=2	15	15	0.213254	0.771682	1.10897	0.551132	0.609638	1.04895	0.125619	0.0984618	0.865833	0.0215152	0.023241	1.25686	0.00868073	0.0170699	0.51722	0.456986	0.53227	0.94474	627300200	725030300	766760200	739469800	836199900	769160400	865099900	916339500	873429500	401950100	284650000	421730100	674480100	622640100	700200100	46.6	44.175	0	323.31
P0AG84	P0AG84	Uncharacterized oxidoreductase YghA	yghA	sp|P0AG84|YGHA_ECOLI Uncharacterized oxidoreductase YghA OS=Escherichia coli (strain K12) OX=83333 GN=yghA PE=1 SV=1	18	18	0.213315	0.770777	1.11253	0.000303232	0	2.45494	0.000470903	0.00362842	2.19887	0.000365765	0.00161963	2.08	0.00543466	0.0105376	1.65397	0.000380702	0.00443956	2.14615	368309800	449800200	443550000	437039900	485149800	477210100	860639500	860609900	892769900	785040100	628529700	673819700	890940000	865359600	942130600	67.3	31.488	0	250.45
P0A6V1	P0A6V1	Glucose-1-phosphate adenylyltransferase	glgC	sp|P0A6V1|GLGC_ECOLI Glucose-1-phosphate adenylyltransferase OS=Escherichia coli (strain K12) OX=83333 GN=glgC PE=1 SV=2	11	11	0.214318	0.77231	0.889566	0.00927823	0.00983095	0.661836	0.00214426	0.00632021	0.656692	0.000654066	0.00194231	0.597134	0.0972684	0.126927	0.742984	0.00157002	0.0100317	0.573224	187530000	206560100	224660000	162370000	194960000	193520100	125090000	119980000	123460000	187259900	120820000	157760000	126889900	106980000	120750000	32.7	48.697	0	323.31
P18335	P18335	Acetylornithine/succinyldiaminopimelate aminotransferase	argD	sp|P18335|ARGD_ECOLI Acetylornithine/succinyldiaminopimelate aminotransferase OS=Escherichia coli (strain K12) OX=83333 GN=argD PE=1 SV=4	15	15	0.214437	0.771663	1.08013	0.0018242	0.00249412	0.720344	0.00663117	0.00922337	0.646739	0.0105995	0.0129693	0.833318	0.0777956	0.104568	0.628931	0.100722	0.119111	0.909663	520799900	558620400	596340000	565590200	637500200	606349900	463859900	473009900	457569900	430400000	238649900	420200200	487740300	510190300	524810100	52.2	43.766	0	323.31
P04805	P04805	Glutamate--tRNA ligase	gltX	sp|P04805|SYE_ECOLI Glutamate--tRNA ligase OS=Escherichia coli (strain K12) OX=83333 GN=gltX PE=1 SV=1	25	25	0.214737	0.771897	1.04986	0.0342173	0.0282152	1.18522	0.286153	0.256973	1.03937	0.00128624	0.00278746	1.28619	0.914118	0.964905	1.01823	0.0151205	0.0258636	1.19323	497210100	536240300	537790100	528230000	566760200	554219800	682640100	649880200	687700200	640379800	391470100	603820400	594270100	667989600	613659600	60.5	53.815	0	323.31
Q47147	Q47147	Putative glutamine amidotransferase YafJ	yafJ	sp|Q47147|YAFJ_ECOLI Putative glutamine amidotransferase YafJ OS=Escherichia coli (strain K12) OX=83333 GN=yafJ PE=1 SV=1	9	9	0.214744	0.770573	1.06043	0.030238	0.0262923	1.17669	0.0201288	0.0211095	1.18126	0.127456	0.10752	0.933361	0.145255	0.179156	1.21989	0.00838265	0.0192077	1.49349	76519970	76915020	69212020	81838040	76887980	77195990	68680980	68262030	70648040	73609980	103520000	97043950	102890000	128720000	102460000	40	28.635	0	22.499
P0AD68	P0AD68	Peptidoglycan synthase FtsI	ftsI	sp|P0AD68|FTSI_ECOLI Peptidoglycan D,D-transpeptidase FtsI OS=Escherichia coli (strain K12) OX=83333 GN=ftsI PE=1 SV=1	15	15	0.214761	0.769384	0.776427	0.0331412	0.0272374	1.37921	0.173988	0.141465	1.17021	0.403706	0.422251	1.21878	0.00125426	0.0036	4.90696	0.150562	0.17035	1.34578	12169000	12980000	13830000	12519000	11278000	7241902	17872000	10526000	21023010	47850970	58725960	91848030	21022010	20080990	12613000	32	63.877	0	22.489
P0A9W0	P0A9W0	HTH-type transcriptional regulator UlaR	ulaR	sp|P0A9W0|ULAR_ECOLI HTH-type transcriptional regulator UlaR OS=Escherichia coli (strain K12) OX=83333 GN=ulaR PE=1 SV=1	10	10	0.215378	0.770728	1.14659	0.0699006	0.0500444	1.2457	0.0190727	0.0201011	1.43154	0.544574	0.627708	1.05419	0.205183	0.250216	1.19792	0.0238852	0.0358714	1.44626	29719990	37398000	36739990	43658030	35891990	39282010	34920000	38537010	35549980	44651010	34210980	45954020	44023000	49454970	56739970	41.4	27.602	0	14.461
P0AAW1	P0AAW1	Uncharacterized protein YbhP	ybhP	sp|P0AAW1|YBHP_ECOLI Uncharacterized protein YbhP OS=Escherichia coli (strain K12) OX=83333 GN=ybhP PE=4 SV=1	6	6	0.215516	0.77	1.43895	0.324006	0.272946	1.45001	0.156293	0.124458	1.55136	0.0688059	0.0596996	1.80932	0.167182	0.205556	1.76564	0.0473727	0.0656584	2.04873	2619954	5588302	3366218	6044698	5698400	4263101	6276404	5891899	7893999	7029903	4029798	9576194	7192904	9431700	6247098	20.9	28.789	0	5.5787
P0AGI8	P0AGI8	Trk system potassium uptake protein TrkA	trkA	sp|P0AGI8|TRKA_ECOLI Trk system potassium uptake protein TrkA OS=Escherichia coli (strain K12) OX=83333 GN=trkA PE=1 SV=1	13	13	0.216787	0.772743	0.870662	0.232937	0.176157	1.107	0.488184	0.526113	1.0747	0.16427	0.142332	0.876179	0.865488	0.942631	0.986423	0.305598	0.341484	1.12885	46012020	53964980	54857970	38556990	49378010	47221010	48511970	46528980	40590990	51073020	46337020	55245030	62541960	48864970	64114990	29.3	50.367	0	17.842
P13016	P13016	1,6-anhydro-N-acetylmuramyl-L-alanine amidase AmpD	ampD	sp|P13016|AMPD_ECOLI 1,6-anhydro-N-acetylmuramyl-L-alanine amidase AmpD OS=Escherichia coli (strain K12) OX=83333 GN=ampD PE=1 SV=1	3	3	0.216873	0.771639	0.911047	0.0405328	0.0318966	0.771486	0.0330752	0.0314327	0.77326	0.139429	0.1187	0.849345	0.592404	0.778612	0.954462	0.00108977	0.00978344	0.575833	17249990	14902000	14846990	13148000	14934010	14698000	14029000	11471010	14531010	16902000	14242010	13786010	8290198	9593301	9162802	19.7	20.536	0.00050994	3.7613
P75792	P75792	Sugar phosphatase YbiV	ybiV	sp|P75792|SUPH_ECOLI Sugar phosphatase YbiV OS=Escherichia coli (strain K12) OX=83333 GN=ybiV PE=1 SV=1	5	5	0.217166	0.772054	1.19599	0.00502603	0.00555272	2.68827	0.00168298	0.0059233	2.01152	0.00133227	0.00271186	1.78846	0.17425	0.212795	1.28887	0.0211823	0.033005	2.04446	2061801	2248202	2391799	3269301	2636800	2200199	3704101	4478202	3823501	2405000	2562099	3852301	4070202	3527698	6598303	22.9	30.412	0	7.957
P77348	P77348	Periplasmic murein peptide-binding protein	mppA	sp|P77348|MPPA_ECOLI Periplasmic murein peptide-binding protein OS=Escherichia coli (strain K12) OX=83333 GN=mppA PE=1 SV=2	25	25	0.217225	0.771078	1.10068	0.616998	0.700315	1.04271	0.0700722	0.0576054	1.29082	0.786777	0.873263	1.01826	0.0438764	0.0590356	1.38287	0.0390515	0.0565865	1.26118	435140200	537970000	498879900	557240300	539390100	518109900	493179900	505380300	494690300	600390300	811460400	633909800	563360400	641350000	648380000	61.6	59.899	0	235.07
P24215	P24215	Mannonate dehydratase	uxuA	sp|P24215|UXUA_ECOLI Mannonate dehydratase OS=Escherichia coli (strain K12) OX=83333 GN=uxuA PE=1 SV=2	23	23	0.219452	0.779371	1.04501	3.14733e-05	0	0.482579	0.0010734	0.00346479	0.765139	0.000128458	0.0014433	0.62407	0.00466485	0.00900763	0.583269	0.000231747	0.00406154	0.659752	909979600	890009900	827470200	897120400	923489500	923129400	531469900	559349800	547920100	572619800	427420100	543330200	564630200	571590400	596310000	61.7	44.838	0	323.31
P77756	P77756	7-cyano-7-deazaguanine synthase	queC	sp|P77756|QUEC_ECOLI 7-cyano-7-deazaguanine synthase OS=Escherichia coli (strain K12) OX=83333 GN=queC PE=1 SV=1	5	5	0.219635	0.779014	0.808351	0.605969	0.687341	0.922934	0.00855377	0.0111787	0.598601	0.423461	0.450069	1.11446	0.417898	0.578008	1.11304	0.735818	0.824066	0.963587	29932010	40857020	30345000	32393000	22484990	26911990	33288000	36770990	41965000	41800990	34013980	35990010	31716990	31646000	33079000	32	25.514	0	99.793
P00887	P00887	Phospho-2-dehydro-3-deoxyheptonate aldolase, Trp-sensitive	aroH	sp|P00887|AROH_ECOLI Phospho-2-dehydro-3-deoxyheptonate aldolase, Trp-sensitive OS=Escherichia coli (strain K12) OX=83333 GN=aroH PE=1 SV=4	7	7	0.221035	0.783062	1.07454	0.000739405	0.0022695	1.53958	0.0431255	0.0395228	1.2032	0.000775302	0.00236522	1.51919	0.128239	0.161647	1.54353	0.110491	0.128567	1.23222	30194010	30565000	33983020	32643980	36150000	32972980	47762990	50156030	45901980	53840980	31728990	67512970	34255020	36592000	46813000	23.9	38.735	0	20.388
P0A9K3	P0A9K3	PhoH-like protein	ybeZ	sp|P0A9K3|PHOL_ECOLI PhoH-like protein OS=Escherichia coli (strain K12) OX=83333 GN=ybeZ PE=1 SV=2	17	17	0.221395	0.783461	1.06727	0.00580761	0.00618405	1.2609	0.0248868	0.0256107	1.196	0.00462453	0.00796574	1.29289	0.0166252	0.0288241	1.3948	0.180028	0.205239	1.12339	195280100	222760000	219660000	219370100	228059900	232190100	268890100	283519900	270880000	330380000	257899900	304310200	214510000	240729900	262339900	58.4	39.038	0	239.14
P30844	P30844	Sensor protein BasS	basS	sp|P30844|BASS_ECOLI Sensor protein BasS OS=Escherichia coli (strain K12) OX=83333 GN=basS PE=1 SV=1	5	5	0.22178	0.782474	1.4364	0.155118	0.111202	1.36479	0.312485	0.283022	1.27635	0.809669	0.89144	0.93891	0.665022	0.830888	1.16029	0.194757	0.219653	1.35725	9753801	15181990	16658990	17869990	27807000	14713010	9724598	17926000	11713000	18771010	9178503	22366010	22669990	16679000	16312000	15.2	41.029	0.00049925	3.0964
P75989	P75989	HTH-type transcriptional repressor BluR	bluR	sp|P75989|BLUR_ECOLI HTH-type transcriptional repressor BluR OS=Escherichia coli (strain K12) OX=83333 GN=bluR PE=1 SV=1	3	3	0.222768	0.785718	1.27959	0.946092	0.972361	1.01083	0.0297298	0.0289372	1.45752	0.280261	0.264973	1.03679	0.41655	0.577019	1.127	0.568931	0.672126	1.10168	3191600	3469402	3477102	3416099	3940701	5992302	3541399	3461100	3500802	4173500	2949398	4477302	3776099	2830402	4816802	14.4	28.264	0.00051099	3.792
P31060	P31060	Putative molybdenum transport ATP-binding protein ModF	modF	sp|P31060|MODF_ECOLI ABC transporter ATP-binding protein ModF OS=Escherichia coli (strain K12) OX=83333 GN=modF PE=2 SV=2	12	12	0.223256	0.786044	0.894828	0.155393	0.111336	0.882154	0.129972	0.100195	0.835165	0.0544199	0.04991	1.2601	0.010186	0.0180455	1.56947	0.854716	0.911998	1.0247	24144010	27168020	29433990	26350010	22065990	23792000	29785990	36448980	35582000	46861980	36017000	44223030	23510990	25935990	34067000	31.2	54.535	0	56.777
Q46939	Q46939	Probable acetyl-CoA acetyltransferase	yqeF	sp|Q46939|YQEF_ECOLI Probable acetyl-CoA acetyltransferase OS=Escherichia coli (strain K12) OX=83333 GN=yqeF PE=3 SV=2	10	10	0.224033	0.78792	0.848519	0.117079	0.0825269	1.33169	0.11085	0.0868806	1.27977	0.00940558	0.0114411	1.70181	0.000505713	0.00431579	4.24588	0.097471	0.116453	1.30835	20547010	29844020	22278010	20507010	19709990	20648010	40373000	40665010	41010980	108450000	86010040	112100000	29470980	34693000	29923980	38.2	41.018	0	26.845
P39353	P39353	Uncharacterized oxidoreductase YjhC	yjhC	sp|P39353|YJHC_ECOLI Uncharacterized oxidoreductase YjhC OS=Escherichia coli (strain K12) OX=83333 GN=yjhC PE=1 SV=2	7	7	0.224293	0.787285	0.657335	0.000949348	0.00207792	0.427318	0.00554126	0.00840441	0.500843	0.932957	0.969478	0.992231	0.219344	0.269413	0.27028	0.0161299	0.0276	0.560121	40084000	45922010	53777030	17399010	41227020	39196000	44569980	45565980	47615020	29300010	2088459	31940010	23700010	22445990	32700010	16.9	41.384	0	13.4
P18196	P18196	Septum site-determining protein MinC	minC	sp|P18196|MINC_ECOLI Septum site-determining protein MinC OS=Escherichia coli (strain K12) OX=83333 GN=minC PE=1 SV=1	8	8	0.224307	0.785973	1.03912	0.00204234	0.00285078	1.36893	0.0366867	0.034139	1.38132	0.000424355	0.00150857	1.44496	0.00894332	0.0171856	1.69981	0.0895188	0.106375	0.93139	45822980	48745990	47203970	48113020	48135990	51080990	68398980	64833040	71733020	95654000	65521000	82626990	44901000	45435990	41758020	39.4	24.775	0	23.024
P61175	P61175	50S ribosomal protein L22	rplV	sp|P61175|RL22_ECOLI 50S ribosomal protein L22 OS=Escherichia coli (strain K12) OX=83333 GN=rplV PE=1 SV=1	13	13	0.224979	0.786203	1.09752	0.00441228	0.00512957	1.47743	0.0115776	0.013619	1.34406	0.0107157	0.013109	1.29433	0.239293	0.297749	0.864705	0.00181067	0.0102967	1.49055	1685601000	1916999000	2009299000	2209801000	1974901000	1966800000	2490900000	2310699000	2445999000	1874801000	1368300000	1636399000	2744502000	2856399000	2742699000	63.6	12.226	0	323.31
P21829	P21829	Pyridoxal phosphate phosphatase YbhA	ybhA	sp|P21829|YBHA_ECOLI Pyridoxal phosphate phosphatase YbhA OS=Escherichia coli (strain K12) OX=83333 GN=ybhA PE=1 SV=3	4	4	0.225046	0.785203	0.584757	0.0102311	0.0104183	0.229639	0.0139274	0.0160264	0.27546	0.029467	0.0293119	0.340323	0.0271514	0.0408682	0.35508	0.0904973	0.106861	0.460318	3001801	1491101	4056600	1064901	2338201	1458100	770720	1166601	795990	855190	891430	1066300	1701001	901600	1154800	18.4	30.201	0.000501	3.2026
P0AED5	P0AED5	Response regulator UvrY	uvrY	sp|P0AED5|UVRY_ECOLI Response regulator UvrY OS=Escherichia coli (strain K12) OX=83333 GN=uvrY PE=1 SV=1	4	4	0.225216	0.784093	1.08747	0.0367486	0.0303663	0.686377	0.00755093	0.0101234	0.786511	0.661714	0.762785	1.05879	0.878468	0.947866	0.988062	0.0257461	0.0389142	0.874576	9304099	9709401	10097000	9491606	10934000	11303000	11124010	8128101	11973990	11017000	8983003	8890503	8016801	8543895	8908305	24.3	23.892	0	4.7077
P30125	P30125	3-isopropylmalate dehydrogenase	leuB	sp|P30125|LEU3_ECOLI 3-isopropylmalate dehydrogenase OS=Escherichia coli (strain K12) OX=83333 GN=leuB PE=1 SV=3	15	15	0.226096	0.786695	1.02118	7.30045e-07	0	0.2519	3.68863e-07	0	0.257053	1.33812e-07	0	0.291005	5.48036e-06	0	0.326903	0.027189	0.0404908	0.804685	4571496000	4582800000	4464203000	4730105000	4536996000	4640906000	1352400000	1315400000	1295600000	1586701000	1428700000	1441299000	3456298000	4144199000	3402199000	60.9	39.517	0	323.31
P0C066	P0C066	Membrane-bound lytic murein transglycosylase C	mltC	sp|P0C066|MLTC_ECOLI Membrane-bound lytic murein transglycosylase C OS=Escherichia coli (strain K12) OX=83333 GN=mltC PE=1 SV=1	9	9	0.227078	0.789785	1.09335	0.109006	0.0760695	1.34719	0.00939691	0.0120483	1.66634	0.726966	0.825513	1.06366	0.23641	0.294801	1.68235	0.0785672	0.0936502	1.26528	21285010	21985010	21995010	26597990	23521990	21502000	17680000	22470990	31176990	27166010	76888990	23463010	22559010	30656020	30146990	36.8	40.112	0	12.153
P50465	P50465	Endonuclease 8	nei	sp|P50465|END8_ECOLI Endonuclease 8 OS=Escherichia coli (strain K12) OX=83333 GN=nei PE=1 SV=3	1	1	0.227729	0.791281	0.795818	0.0716092	0.0511108	0.707496	0.192159	0.157414	0.647946	0.137997	0.117683	0.712919	0.45621	0.622905	0.858265	0.107123	0.125172	0.709776	6018002	4218702	3896500	3922498	4115900	3088301	2570601	3667099	3802500	4602601	3072199	4422999	3341600	2749002	3850702	4.6	29.845	0.0014706	2.6976
P0AEN4	P0AEN4	Cell division protein FtsL	ftsL	sp|P0AEN4|FTSL_ECOLI Cell division protein FtsL OS=Escherichia coli (strain K12) OX=83333 GN=ftsL PE=1 SV=1	3	3	0.229112	0.793371	1.32902	0.560438	0.622852	1.25915	0.360683	0.340023	0.790694	0.579	0.669489	1.24283	0.724832	0.868281	0.81928	0.970457	0.983113	0.990198	1673800	2177201	1975322	2156400	2108531	3716384	1271600	4292635	2531660	1193600	4350402	762340	1512600	3076801	1501700	36.4	13.627	0	6.2021
P0A8A8	P0A8A8	Ribosome maturation factor RimP	rimP	sp|P0A8A8|RIMP_ECOLI Ribosome maturation factor RimP OS=Escherichia coli (strain K12) OX=83333 GN=rimP PE=1 SV=2	2	2	0.230121	0.795632	0.731766	0.378649	0.341627	0.854492	0.512597	0.561277	1.16673	0.471716	0.518389	0.788814	0.454511	0.620942	1.14618	0.604513	0.713083	1.12835	2993700	2628200	3956001	2783201	2755599	1590301	1554400	4006737	2452975	3553701	4410602	2990200	4524298	2508299	3940201	14.7	16.651	0.0065207	1.9308
P37760	P37760	dTDP-4-dehydrorhamnose reductase	rfbD	sp|P37760|RMLD_ECOLI dTDP-4-dehydrorhamnose reductase OS=Escherichia coli (strain K12) OX=83333 GN=rfbD PE=3 SV=2	7	7	0.230553	0.795993	1.11316	0.236353	0.178423	1.1073	0.522817	0.575779	0.948745	0.972168	0.985725	0.997566	0.269758	0.340085	1.12522	0.483639	0.56453	1.08286	38551020	39002980	32421020	43193000	37088980	41973990	36340000	38246990	34817990	36845980	46851010	40231010	34293980	45895000	39327010	32.4	32.694	0	73.791
P06989	P06989	Histidine biosynthesis bifunctional protein HisIE;Phosphoribosyl-AMP cyclohydrolase;Phosphoribosyl-ATP pyrophosphatase	hisI	sp|P06989|HIS2_ECOLI Histidine biosynthesis bifunctional protein HisIE OS=Escherichia coli (strain K12) OX=83333 GN=hisI PE=3 SV=3	4	4	0.231	0.795601	0.917932	0.00990352	0.0103265	0.551275	0.242228	0.207254	0.78984	0.0464217	0.0434128	0.715323	0.718848	0.866644	1.04424	0.76432	0.844722	0.94553	53007980	62183970	56431010	55084000	48518000	53832010	37445990	50611980	35923980	57714960	72116050	50888010	38626990	65796000	61869000	17.7	22.756	0	7.9005
P33644	P33644	Laccase domain protein YfiH	yfiH	sp|P33644|PURNU_ECOLI Purine nucleoside phosphorylase YfiH OS=Escherichia coli (strain K12) OX=83333 GN=yfiH PE=1 SV=1	10	10	0.23111	0.794993	1.13279	0.0057306	0.00620308	1.58636	0.00401043	0.00735404	1.80017	0.341574	0.337964	1.09674	0.328623	0.43078	1.12618	0.020844	0.0321072	1.44531	82323980	102919900	106400000	105720100	105330000	117679900	100010000	109750000	108350000	96715040	123330000	107949900	127260100	137470000	155580000	42.8	26.339	0	32.661
P32685	P32685	Uncharacterized protein YjbD	yjbD	sp|P32685|YJBD_ECOLI Uncharacterized protein YjbD OS=Escherichia coli (strain K12) OX=83333 GN=yjbD PE=4 SV=1	3	3	0.231268	0.794447	0.526798	0.452232	0.444661	1.13384	0.167235	0.13413	1.28394	0.16297	0.141125	1.33798	0.481749	0.660541	1.17327	0.108292	0.126223	1.73575	49601980	38881990	32160010	44086020	9710197	21182010	46475000	66691040	47932020	34949980	61632980	46505000	53208010	110160000	55338010	35.6	10.532	0	11.537
P0ACF8	P0ACF8	DNA-binding protein H-NS	hns	sp|P0ACF8|HNS_ECOLI DNA-binding protein H-NS OS=Escherichia coli (strain K12) OX=83333 GN=hns PE=1 SV=2	11	10	0.23296	0.800117	1.14408	0.491188	0.508013	1.0782	0.0294739	0.0284573	1.57691	0.54067	0.621816	1.09428	0.658862	0.826357	1.18239	0.240198	0.268176	1.24554	3301101000	3851801000	3400400000	4640304000	3475998000	4014201000	3339802000	4942007000	3432501000	2663702000	8256998000	3249598000	3443400000	5800296000	4183001000	70.8	15.539	0	323.31
P33916	P33916	Uncharacterized ABC transporter ATP-binding protein YejF	yejF	sp|P33916|YEJF_ECOLI Uncharacterized ABC transporter ATP-binding protein YejF OS=Escherichia coli (strain K12) OX=83333 GN=yejF PE=1 SV=1	2	2	0.232997	0.799233	0.876594	0.0230442	0.0218237	0.684032	0.0411574	0.0377446	0.676448	0.0872612	0.0748169	1.27021	0.0921302	0.12056	0.483901	0.557575	0.658072	1.07397	7522104	9384696	10312000	7788200	7872103	7997798	12626990	10962000	10778000	3004521	3366201	8155603	10494000	8575605	10020010	4.9	58.725	0	16.946
P07604	P07604	Transcriptional regulatory protein TyrR	tyrR	sp|P07604|TYRR_ECOLI Transcriptional regulatory protein TyrR OS=Escherichia coli (strain K12) OX=83333 GN=tyrR PE=1 SV=2	18	18	0.233362	0.79987	1.07311	0.518826	0.554997	1.05581	0.0640487	0.0541674	1.14069	0.0236409	0.024797	1.23098	0.172743	0.211811	1.3277	0.0384203	0.056251	1.24131	87455960	95665010	102430000	99857940	106280100	99786940	115770000	110410000	125060000	145659900	90783000	151680100	109189900	114600000	130990000	31.4	57.655	0	44.008
P26646	P26646	Probable acrylyl-CoA reductase AcuI	acuI	sp|P26646|ACUI_ECOLI Probable acrylyl-CoA reductase AcuI OS=Escherichia coli (strain K12) OX=83333 GN=acuI PE=1 SV=1	16	16	0.234969	0.805284	1.02661	0.0156153	0.0158576	0.794293	0.586259	0.665283	0.967486	0.0220791	0.0241325	0.8942	0.510689	0.69328	0.943655	0.0476736	0.0657805	1.1475	611730200	650400200	625959700	648380000	650820000	638569700	539470000	588290000	561090300	619489600	510010200	662390300	677670200	704450000	788270300	53.7	34.723	0	275.94
P37344	P37344	Psp operon transcriptional activator	pspF	sp|P37344|PSPF_ECOLI Psp operon transcriptional activator OS=Escherichia coli (strain K12) OX=83333 GN=pspF PE=1 SV=2	4	4	0.235082	0.804149	1.17041	0.192494	0.139674	1.23686	0.116048	0.0914135	1.28328	0.0255081	0.0260341	1.50824	0.372456	0.505291	1.15306	0.216355	0.240697	1.26855	6794600	9283297	8287995	8298202	10356990	9752396	12185000	13824010	10648010	7614799	9502303	11076010	9540306	13239000	8449403	11.1	36.986	0	5.4685
P60723	P60723	50S ribosomal protein L4	rplD	sp|P60723|RL4_ECOLI 50S ribosomal protein L4 OS=Escherichia coli (strain K12) OX=83333 GN=rplD PE=1 SV=1	11	11	0.235123	0.80285	1.13002	0.740637	0.829736	0.975975	0.522156	0.575238	0.949309	0.310698	0.299871	0.90867	0.136943	0.16958	0.868711	0.0485652	0.0666748	1.28025	2041501000	2324899000	2557100000	2331199000	2848201000	2637601000	2247399000	1895101000	2137999000	2015900000	1859300000	2122801000	2622400000	3042900000	3191498000	60.2	22.086	0	323.31
P0A6D0	P0A6D0	Arginine repressor	argR	sp|P0A6D0|ARGR_ECOLI Arginine repressor OS=Escherichia coli (strain K12) OX=83333 GN=argR PE=1 SV=1	3	3	0.235369	0.802361	1.20408	0.00526529	0.0055937	1.72479	0.0259905	0.0258614	1.85942	0.0428546	0.0406889	1.53373	0.224236	0.274668	1.19287	0.06176	0.0794	1.60868	6725898	7040004	5149400	8980604	7111096	6664997	9251099	11742000	8098303	6904104	8650897	6929297	8178797	13675010	9075504	48.1	16.994	0	28.493
P0A8I1	P0A8I1	Putative Holliday junction resolvase	yqgF	sp|P0A8I1|YQGF_ECOLI Putative pre-16S rRNA nuclease OS=Escherichia coli (strain K12) OX=83333 GN=yqgF PE=1 SV=1	5	5	0.235571	0.801192	1.10788	0.00169328	0.00259804	1.66634	0.000316697	0.00145912	1.58424	0.00540103	0.0085	1.52022	0.00471421	0.00893939	2.00918	0.063305	0.0813688	1.37945	9974302	10952000	10365990	12638000	12062000	10100990	18279990	14745000	14760000	21106000	25658990	16959010	12570990	18389000	12858000	50	15.186	0	5.3223
P0AA04	P0AA04	Phosphocarrier protein HPr	ptsH	sp|P0AA04|PTHP_ECOLI Phosphocarrier protein HPr OS=Escherichia coli (strain K12) OX=83333 GN=ptsH PE=1 SV=1	7	7	0.23587	0.799583	1.19759	0.124719	0.0870312	1.3302	0.299572	0.270507	1.18539	0.330226	0.323841	1.13962	0.250991	0.311224	1.33094	0.55038	0.649162	0.918088	629440200	439610000	476070200	590680300	549939800	696540200	537100200	577110000	629010100	562869800	977100500	564700400	421330000	538310100	449460200	78.8	9.1193	0	323.31
P09151	P09151	2-isopropylmalate synthase	leuA	sp|P09151|LEU1_ECOLI 2-isopropylmalate synthase OS=Escherichia coli (strain K12) OX=83333 GN=leuA PE=1 SV=5	39	39	0.23626	0.799609	1.09943	2.80728e-05	0	0.319199	4.05408e-05	0	0.326364	8.67728e-05	0.00170732	0.239597	0.00715398	0.0148079	0.334355	0.107597	0.125509	1.14669	3616601000	4306703000	4044400000	4054701000	4738404000	4357205000	1088299000	847770000	939110000	1714300000	876639800	1566800000	4651299000	4208801000	4851800000	86.2	57.297	0	323.31
P0A9W6	P0A9W6	Acid stress protein IbaG	ibaG	sp|P0A9W6|IBAG_ECOLI Acid stress protein IbaG OS=Escherichia coli (strain K12) OX=83333 GN=ibaG PE=1 SV=1	4	4	0.23686	0.800742	1.11685	0.196011	0.142399	1.12429	0.241875	0.206713	1.2968	0.20537	0.184633	0.769285	0.457069	0.624433	1.29211	0.0123962	0.0211653	1.46137	34344980	27140020	32200980	33897980	37336000	33039000	17927990	31008000	24581010	26305010	72352020	34021000	44877970	50008970	41738980	39.3	9.4516	0	9.855
P0A7N4	P0A7N4	50S ribosomal protein L32	rpmF	sp|P0A7N4|RL32_ECOLI 50S ribosomal protein L32 OS=Escherichia coli (strain K12) OX=83333 GN=rpmF PE=1 SV=2	5	5	0.237575	0.802479	1.08969	0.0198263	0.0194737	1.39076	0.0632817	0.0533841	1.36739	0.503093	0.564707	1.05645	0.520652	0.704545	0.887174	0.00851819	0.0193669	1.25851	286280000	321350200	291579900	358669900	320460100	301970100	353529900	281750200	317529900	199680000	355330100	263990000	384330100	392759900	354210100	70.2	6.4463	0	220.44
P77212	P77212	Probable pyridine nucleotide-disulfide oxidoreductase RclA	rclA	sp|P77212|RCLA_ECOLI Probable pyridine nucleotide-disulfide oxidoreductase RclA OS=Escherichia coli (strain K12) OX=83333 GN=rclA PE=1 SV=2	13	13	0.23771	0.801199	0.756511	0.00448962	0.00507061	0.736885	0.894794	0.93444	0.9953	0.00552528	0.00866531	0.733791	0.011814	0.0226987	0.418917	0.531509	0.627648	0.947913	83207990	80636980	82822980	42088020	82075980	69649970	56733970	57363970	67466030	46275980	23637990	37348000	82771980	66812040	85588980	39	48.244	0	49.356
P0A915	P0A915	Outer membrane protein W	ompW	sp|P0A915|OMPW_ECOLI Outer membrane protein W OS=Escherichia coli (strain K12) OX=83333 GN=ompW PE=1 SV=1	5	5	0.237928	0.800465	1.31954	0.161144	0.114609	0.686788	0.00256926	0.00692804	0.114437	0.0527822	0.0487056	1.75505	0.0126129	0.0236589	0.131665	0.00154194	0.0100851	0.158593	260020100	177770100	131270000	254739900	238129900	229819900	313640200	292120100	358019900	15575000	56484000	15743000	35457980	30490980	22387010	42	22.928	0	79.258
P68398	P68398	tRNA-specific adenosine deaminase	tadA	sp|P68398|TADA_ECOLI tRNA-specific adenosine deaminase OS=Escherichia coli (strain K12) OX=83333 GN=tadA PE=1 SV=2	3	3	0.237959	0.799192	0.739511	0.724625	0.815697	0.910189	0.604622	0.68603	1.30046	0.420675	0.445826	0.825369	0.407397	0.562773	1.23432	0.333462	0.377524	1.26693	2498100	2147646	4017398	1656256	2289399	2298801	2364399	1903501	2692701	4330799	2791600	3352592	3417798	4276729	2998600	22.8	18.717	0.0033365	2.2363
P09832	P09832	Glutamate synthase [NADPH] small chain	gltD	sp|P09832|GLTD_ECOLI Glutamate synthase [NADPH] small chain OS=Escherichia coli (strain K12) OX=83333 GN=gltD PE=1 SV=3	22	22	0.239981	0.807441	1.03528	0.0373139	0.0303782	0.924158	0.00358291	0.00711304	1.2174	1.62116e-06	0	0.405113	0.188992	0.228853	0.774439	0.000643146	0.00583333	1.40421	302129800	290780000	284100000	293580100	312049900	302310000	116590000	120690000	117930100	267919900	164150000	263600100	420150200	386470100	425599900	48.3	52.015	0	114.21
P67660	P67660	Uncharacterized HTH-type transcriptional regulator YhaJ	yhaJ	sp|P67660|YHAJ_ECOLI Probable HTH-type transcriptional regulator YhaJ OS=Escherichia coli (strain K12) OX=83333 GN=yhaJ PE=3 SV=1	11	11	0.240803	0.80852	1.15063	0.686956	0.780697	0.952917	0.232224	0.1973	0.84808	0.958948	0.982402	1.00555	0.247499	0.307418	1.28372	0.75139	0.837419	1.0515	54767030	76944010	68112020	79319950	74843980	73653010	65706030	64639020	68712040	89967060	63075980	106999900	57166980	69870020	83543980	37.9	33.256	0	13.051
P37745	P37745	dTDP-4-dehydrorhamnose 3,5-epimerase	rfbC	sp|P37745|RMLC_ECOLI dTDP-4-dehydrorhamnose 3,5-epimerase OS=Escherichia coli (strain K12) OX=83333 GN=rfbC PE=1 SV=1	3	3	0.241088	0.808563	1.10094	0.606966	0.688398	0.952095	0.213003	0.179208	0.866813	0.468732	0.513936	0.944808	0.108097	0.139867	1.22529	0.566433	0.669191	1.06885	13898010	17240010	15767990	17573990	16111990	17805000	14475000	15699990	14020990	19601990	16538010	21439010	14153000	19011990	17145000	21.1	21.27	0	12.911
P03024	P03024	HTH-type transcriptional regulator GalR	galR	sp|P03024|GALR_ECOLI HTH-type transcriptional regulator GalR OS=Escherichia coli (strain K12) OX=83333 GN=galR PE=1 SV=1	3	3	0.241284	0.807893	1.20408	0.145065	0.10285	1.29011	0.0957404	0.0753742	1.34825	0.162312	0.140867	1.28092	0.0539879	0.0719217	1.58049	0.915562	0.946625	1.01754	14966010	20422000	13103990	17966010	19761000	19693010	19978010	22767000	18505990	28387990	20288010	27453980	15222990	18945000	14631000	10.5	37.094	0.00051046	3.7807
P27848	P27848	Pyridoxal phosphate phosphatase YigL	yigL	sp|P27848|YIGL_ECOLI Pyridoxal phosphate phosphatase YigL OS=Escherichia coli (strain K12) OX=83333 GN=yigL PE=1 SV=4	7	7	0.24132	0.806618	1.16689	0.0117178	0.0122108	3.33338	0.00516013	0.00869202	2.01245	0.0213143	0.0233008	1.78273	0.979581	0.990119	1.0114	0.0793087	0.0948893	1.63275	5593003	4901599	3984102	6206702	5321702	5254003	10293000	6772798	8876903	3616798	10748000	2906901	6642697	11282000	6343701	37.2	29.707	0	7.0681
P23836	P23836	Transcriptional regulatory protein PhoP	phoP	sp|P23836|PHOP_ECOLI Transcriptional regulatory protein PhoP OS=Escherichia coli (strain K12) OX=83333 GN=phoP PE=1 SV=1	12	12	0.241709	0.806098	1.0664	0.000915053	0.00211921	0.62981	0.00949925	0.0122045	0.795565	0.0212644	0.0233308	0.839471	0.237096	0.295422	0.766158	0.0304841	0.0451603	0.780123	341130100	335300000	383770100	361569800	383260000	384149800	308120100	294580100	286099900	319980000	186050000	331610100	248859900	271230100	308759900	65.5	25.535	0	179.44
P77247	P77247	2-deoxyglucose-6-phosphate phosphatase	yniC	sp|P77247|HXPB_ECOLI Hexitol phosphatase B OS=Escherichia coli (strain K12) OX=83333 GN=hxpB PE=1 SV=1	6	6	0.242459	0.806283	1.15401	0.997488	0.999067	0.99976	0.682102	0.7698	1.04153	0.0510652	0.0464336	1.23394	0.221751	0.273795	1.13083	0.253877	0.284422	1.20184	20225000	25695000	22638990	29594010	22650010	26974000	26339010	29250000	28691010	27961980	23559000	25825990	22482010	26752000	33958000	31.1	24.33	0	8.4489
P77674	P77674	Gamma-aminobutyraldehyde dehydrogenase	prr	sp|P77674|ABDH_ECOLI Gamma-aminobutyraldehyde dehydrogenase OS=Escherichia coli (strain K12) OX=83333 GN=patD PE=1 SV=1	13	13	0.243196	0.807931	1.03575	0.0528731	0.0386779	1.18277	0.356948	0.3358	1.05645	7.8387e-05	0.00181818	2.30391	0.593112	0.778687	0.911409	0.00167564	0.00972308	1.58362	208869900	204600000	218450100	222160000	221440100	210850000	522269900	445010200	491210100	199649900	143210000	247189900	314720100	374469800	314589900	45.1	50.829	0	323.31
P32705	P32705	Cation/acetate symporter ActP	actP	sp|P32705|ACTP_ECOLI Cation/acetate symporter ActP OS=Escherichia coli (strain K12) OX=83333 GN=actP PE=1 SV=1	5	5	0.245027	0.811762	0.85543	0.0782315	0.0556873	0.834438	0.0102	0.0132023	0.600302	0.0637681	0.0568692	0.795543	0.278212	0.347826	1.22831	0.0105697	0.0203253	0.613197	1047900000	1183300000	1343001000	848609900	1127999000	1089000000	1046900000	871980400	918480300	1178900000	1934401000	1353299000	829689600	627900100	737029800	10.9	59.196	0	73.61
P0AC28	P0AC28	5-formyltetrahydrofolate cyclo-ligase	ygfA	sp|P0AC28|5FCL_ECOLI 5-formyltetrahydrofolate cyclo-ligase OS=Escherichia coli (strain K12) OX=83333 GN=ygfA PE=1 SV=1	3	3	0.245865	0.81426	1.1127	2.44874e-05	0	3.90616	0.00118897	0.0052093	3.4487	6.90587e-05	0.00197183	3.17856	0.000218555	0.00142857	3.25504	0.009581	0.0198161	3.02501	1893001	1857300	2120300	2159601	2448099	1942499	6849002	6139900	5692903	5948400	5764603	7497699	4249001	9286894	5229402	24.7	21.105	0	12.913
P0AFT5	P0AFT5	Transcriptional regulatory protein YehT	yehT	sp|P0AFT5|BTSR_ECOLI Transcriptional regulatory protein BtsR OS=Escherichia coli (strain K12) OX=83333 GN=btsR PE=1 SV=1	6	6	0.246048	0.81395	0.815875	0.0229347	0.0217868	0.309493	0.078209	0.0643783	0.206586	0.626675	0.728396	0.898564	0.115939	0.148778	0.490768	0.0458931	0.0645714	0.0874106	23024990	28050990	35882020	24296010	20013010	25884990	19928990	24621990	34266020	23756010	7595404	15181990	486633	3949599	8053099	27.2	27.399	0.00050454	3.4192
P0AD57	P0AD57	Octaprenyl-diphosphate synthase	ispB	sp|P0AD57|ISPB_ECOLI Octaprenyl diphosphate synthase OS=Escherichia coli (strain K12) OX=83333 GN=ispB PE=1 SV=1	6	6	0.246209	0.813485	1.0655	0.0727992	0.0518738	1.2223	0.648893	0.737451	1.08668	0.841125	0.90745	0.986966	0.113926	0.147102	1.32603	0.256104	0.286602	1.20986	11992010	10914000	10825010	11365010	11842000	12734000	10002010	11802010	11539000	11398000	17772010	16307990	11284990	12434000	17881010	23.8	35.217	0	33.432
P0ADI4	P0ADI4	Enterobactin synthase component B;Isochorismatase;Aryl carrier protein	entB	sp|P0ADI4|ENTB_ECOLI Enterobactin synthase component B OS=Escherichia coli (strain K12) OX=83333 GN=entB PE=1 SV=1	8	8	0.246928	0.815358	1.14333	0.0042759	0.00519865	1.79831	0.00332038	0.0074195	1.94434	0.821205	0.898141	0.976124	0.358864	0.478223	1.16094	0.0325821	0.0482316	1.4234	30867990	38971020	42936000	43650980	41664000	42444970	34858010	37041990	37204000	50272010	35267000	45582980	49468970	58424020	51537990	33.7	32.554	0	18.094
P0AD01	P0AD01	Transcriptional regulatory protein DcuR	dcuR	sp|P0AD01|DCUR_ECOLI Transcriptional regulatory protein DcuR OS=Escherichia coli (strain K12) OX=83333 GN=dcuR PE=1 SV=1	3	3	0.247512	0.816336	0.867858	0.00103705	0.00194529	0.229289	0.027789	0.0265948	0.548026	0.000389665	0.00157143	0.206846	0.027648	0.0416245	0.51519	0.0507794	0.0689168	0.801469	12158000	14964010	15573000	11438010	14162990	11432010	3692299	2455301	2765800	7180904	5376900	10034010	11148000	11872010	11021000	14.6	27.488	0	4.9569
P33360	P33360	Putative osmoprotectant uptake system ATP-binding protein YehX	yehX	sp|P33360|YEHX_ECOLI Glycine betaine uptake system ATP-binding protein YehX OS=Escherichia coli (strain K12) OX=83333 GN=yehX PE=1 SV=1	8	8	0.247587	0.815068	0.691736	0.0825799	0.0584545	2.62101	0.181034	0.146583	1.66953	0.923731	0.962019	0.973656	0.341509	0.449523	1.32872	0.182171	0.207731	1.57936	161570000	89262950	69731970	74806980	79735990	55806970	94838030	86269010	113460000	113100000	138270000	150859900	205610000	146700000	131350100	33.1	34.424	0	26.674
P0AEE5	P0AEE5	D-galactose-binding periplasmic protein	mglB	sp|P0AEE5|DGAL_ECOLI D-galactose-binding periplasmic protein OS=Escherichia coli (strain K12) OX=83333 GN=mglB PE=1 SV=1	31	31	0.248071	0.81556	1.09946	0.000168279	0	0.642336	1.84295e-06	0	0.20542	0.000359158	0.00163975	1.21933	0.0152724	0.0278458	0.336245	0.000385407	0.00429787	0.362596	8694708000	8710908000	8317895000	10768990000	8575705000	9066293000	10373000000	10646010000	10342000000	2230199000	4922197000	2181701000	2814300000	3726400000	2863799000	81.6	35.712	0	323.31
P32160	P32160	Uncharacterized protein YiiQ	yiiQ	sp|P32160|YIIQ_ECOLI Uncharacterized protein YiiQ OS=Escherichia coli (strain K12) OX=83333 GN=yiiQ PE=3 SV=1	8	8	0.248253	0.814632	0.876349	0.00134703	0.00281915	1.66661	0.0748487	0.0607517	1.46224	0.139961	0.119128	0.925413	0.121403	0.153275	1.72344	0.126675	0.1475	1.15291	22368990	23979000	21154000	19709990	16819990	23035010	20051010	20759000	21604010	28328010	67028970	30589990	23004000	26329990	28708010	46.7	21.763	0	14.581
P0AAT9	P0AAT9	Uncharacterized protein YbeL	ybeL	sp|P0AAT9|YBEL_ECOLI Uncharacterized protein YbeL OS=Escherichia coli (strain K12) OX=83333 GN=ybeL PE=4 SV=1	5	5	0.248619	0.814386	1.23325	0.0369039	0.030411	1.32224	0.0255091	0.0256954	1.35275	0.0141997	0.0165225	1.40569	0.0863225	0.113457	1.62466	0.570679	0.674591	0.910441	296890000	304620100	251170000	453679800	277060100	338960100	366659900	442240200	389109900	372160000	694199600	377050100	233919900	339530100	215840000	39.4	18.797	0	181.08
P0AFU8	P0AFU8	Riboflavin synthase	ribC	sp|P0AFU8|RISA_ECOLI Riboflavin synthase OS=Escherichia coli (strain K12) OX=83333 GN=ribC PE=1 SV=1	10	10	0.248815	0.8135	1.06889	0.434749	0.419092	1.08728	0.0690009	0.0572331	1.25233	0.0283125	0.0283318	1.15234	0.864069	0.941837	1.01099	0.0559926	0.0727595	1.28154	154220000	152630000	169759900	162520100	164810000	182190000	175860000	191679900	181389900	156199900	176550100	149729900	171400100	216200100	226959900	58.7	23.445	0	84.303
P0ADZ0	P0ADZ0	50S ribosomal protein L23	rplW	sp|P0ADZ0|RL23_ECOLI 50S ribosomal protein L23 OS=Escherichia coli (strain K12) OX=83333 GN=rplW PE=1 SV=1	6	6	0.249364	0.814046	1.08589	0.00106313	0.00191617	1.47682	0.295425	0.266105	1.15588	0.144944	0.12448	1.10548	0.332957	0.437994	0.93358	0.00249255	0.0117322	1.54935	674430200	774049800	696680200	735870100	847599700	746630200	743959900	782389700	844149700	643339600	730870100	629380300	1127400000	1191700000	1006799000	56	11.199	0	143.36
P00904	P00904	Bifunctional protein TrpGD;Anthranilate synthase component 2;Anthranilate phosphoribosyltransferase	trpGD	sp|P00904|TRPGD_ECOLI Bifunctional protein TrpGD OS=Escherichia coli (strain K12) OX=83333 GN=trpGD PE=1 SV=3	13	13	0.249468	0.812794	0.909521	0.00147463	0.00270408	0.563924	0.000780646	0.00378243	0.526473	0.0679219	0.0589668	0.81747	0.0204335	0.034824	0.59155	0.0327853	0.0485521	0.813889	75591990	70205960	85950020	66254010	75364980	68731020	69443000	57290980	62631990	47508000	35822020	55482030	59587030	63906980	64578960	40.7	56.869	0	94.32
P0A729	P0A729	Maf-like protein YceF	yceF	sp|P0A729|NTPPB_ECOLI 7-methyl-GTP pyrophosphatase OS=Escherichia coli (strain K12) OX=83333 GN=yceF PE=1 SV=1	6	6	0.250289	0.815932	1.13514	0.00834555	0.0088498	1.29031	0.00169188	0.00590588	1.37867	0.0154146	0.0175169	1.23272	0.136879	0.169553	1.15706	0.00253148	0.0122	1.25309	229689900	226710100	217380100	228169900	236729900	306529800	305180000	264229900	262960000	279809900	281240000	222820100	268639900	279279900	296870000	30.4	21.691	0	66.097
P0AF63	P0AF63	HTH-type transcriptional repressor NsrR	nsrR	sp|P0AF63|NSRR_ECOLI HTH-type transcriptional repressor NsrR OS=Escherichia coli (strain K12) OX=83333 GN=nsrR PE=3 SV=1	5	5	0.250836	0.817233	1.23665	0.00126452	0.00213115	1.68873	0.00162441	0.00563582	1.46947	0.449778	0.487032	0.91322	0.297533	0.380743	1.36906	0.0120657	0.0212295	1.46927	29467980	27268020	32444000	27625980	38744010	46063020	26748000	32170000	23074000	35066010	67002040	28473020	44636020	48717000	38026000	38.3	15.593	0	16.607
P0A9Z1	P0A9Z1	Nitrogen regulatory protein P-II 1	glnB	sp|P0A9Z1|GLNB_ECOLI Nitrogen regulatory protein P-II 1 OS=Escherichia coli (strain K12) OX=83333 GN=glnB PE=1 SV=1	7	7	0.250881	0.816159	1.13553	0.118833	0.083594	0.85685	0.914991	0.949906	0.990896	0.0444288	0.0419629	0.831193	0.809545	0.921764	1.08407	0.0046477	0.0130473	0.760342	71657010	81249950	77538030	73502040	98262950	91517970	57440010	67619980	66743970	63816970	154680000	58262970	60711030	54883000	59554980	50.9	12.425	0	57.551
P77625	P77625	Sugar phosphatase YfbT	yfbT	sp|P77625|HXPA_ECOLI Hexitol phosphatase A OS=Escherichia coli (strain K12) OX=83333 GN=hxpA PE=1 SV=2	6	6	0.250886	0.814911	1.12069	0.0381632	0.0309357	1.17615	0.0323452	0.0309231	1.25625	0.585607	0.678005	1.10911	0.953804	0.97811	1.00649	0.012865	0.0224665	1.37348	32855010	38592990	37135000	45152980	35552990	41285000	28650980	46255980	48474020	30291010	38548990	41114020	45712000	48326970	55225970	44	23.007	0	16.832
P52096	P52096	Uncharacterized protein YaeR	yaeR	sp|P52096|YAER_ECOLI Uncharacterized protein YaeR OS=Escherichia coli (strain K12) OX=83333 GN=yaeR PE=4 SV=1	2	2	0.250987	0.813856	0.834896	0.42106	0.399565	0.907386	0.0562962	0.0478356	1.28653	0.613346	0.71255	0.953832	0.740461	0.879416	1.06167	0.0605855	0.0781883	0.556488	5086898	5797299	4333703	3409900	4624303	4716798	4949900	4838400	4630800	4115301	5451002	6817599	4256799	2194299	2357900	17.8	14.737	0.0014584	2.5573
P30859	P30859	Putative ABC transporter arginine-binding protein 2	artI	sp|P30859|ARTI_ECOLI Putative ABC transporter arginine-binding protein 2 OS=Escherichia coli (strain K12) OX=83333 GN=artI PE=1 SV=3	21	21	0.251443	0.813165	1.11076	0.00275191	0.00418511	1.36406	0.0226495	0.0236518	1.71788	0.0195654	0.0213263	1.18605	0.0775805	0.104401	1.89163	0.0699342	0.0863408	1.19	1043701000	1035701000	952770000	1228300000	971340600	1183000000	1159500000	1283400000	1154701000	1577600000	3245601000	1361500000	1100200000	1362601000	1157700000	64.2	26.929	0	323.31
P15070	P15070	Flagellar motor switch protein FliN	fliN	sp|P15070|FLIN_ECOLI Flagellar motor switch protein FliN OS=Escherichia coli (strain K12) OX=83333 GN=fliN PE=1 SV=1	2	2	0.252413	0.815038	1.92127	0.0127769	0.0134234	8.04134	0.465508	0.491588	2.08674	0.220202	0.200784	2.87715	0.0341375	0.0469682	5.17815	0.217723	0.242256	2.45071	1092082	1116228	4693223	3418892	3010071	3942577	7644101	1751542	10177000	13234990	8857735	6775735	3032596	9350144	2969784	12.4	14.855	0.00050659	3.5352
P0AFM6	P0AFM6	Phage shock protein A	pspA	sp|P0AFM6|PSPA_ECOLI Phage shock protein A OS=Escherichia coli (strain K12) OX=83333 GN=pspA PE=1 SV=2	19	19	0.252874	0.815392	1.02995	0.0157617	0.0161191	1.22069	1.98148e-06	0	8.02118	2.66547e-05	0	1.74625	0.00348964	0.0058355	1.89339	0.31723	0.357177	0.940052	304770000	296380200	295050100	319750000	299840200	303710100	546559900	506629900	512520000	508260200	694689900	512339800	270350100	311889800	262569900	64.4	25.493	0	323.31
P0AFT2	P0AFT2	Inner membrane amino-acid ABC transporter permease protein YecS	yecS	sp|P0AFT2|TCYL_ECOLI L-cystine transport system permease protein TcyL OS=Escherichia coli (strain K12) OX=83333 GN=tcyL PE=1 SV=1	6	6	0.252876	0.814155	1.47636	0.841287	0.907556	1.09499	0.447978	0.466527	1.28496	0.262194	0.244259	1.45651	0.624966	0.803572	1.16928	0.0929466	0.111526	1.91108	53675030	23157000	55830000	56089970	67136990	59299010	61152000	56619030	61928980	44374010	55423020	45109010	69880000	78575970	88209000	32.4	24.801	0	14.154
P15373	P15373	Antitoxin PrlF	prlF	sp|P15373|PRLF_ECOLI Antitoxin PrlF OS=Escherichia coli (strain K12) OX=83333 GN=prlF PE=1 SV=1	4	4	0.253895	0.816964	1.07073	0.0103532	0.0104855	1.43166	0.0481618	0.0434291	1.46388	0.00111544	0.00295203	1.25101	0.0956399	0.12444	1.22547	0.217366	0.242116	1.16898	45435030	47825990	46592020	52945990	45264990	51856970	56435040	57725040	60846030	52438980	68704040	51717020	45246980	65248020	54781000	42.3	12.359	0	11.562
P69874	P69874	Spermidine/putrescine import ATP-binding protein PotA	potA	sp|P69874|POTA_ECOLI Spermidine/putrescine import ATP-binding protein PotA OS=Escherichia coli (strain K12) OX=83333 GN=potA PE=1 SV=1	13	13	0.254132	0.816514	0.925753	0.139569	0.098205	1.0466	0.627979	0.713067	1.06457	0.00155462	0.00325879	1.45794	0.00534639	0.0106137	1.89713	0.201588	0.226527	0.807098	106970000	113830000	113880000	97034980	114990000	98597000	163989900	174800000	149910000	224040100	169610100	249160100	98006060	68603020	108430000	44.4	43.028	0	52.169
P0A8V6	P0A8V6	Fatty acid metabolism regulator protein	fadR	sp|P0A8V6|FADR_ECOLI Fatty acid metabolism regulator protein OS=Escherichia coli (strain K12) OX=83333 GN=fadR PE=1 SV=2	10	10	0.254464	0.816562	1.09895	0.127234	0.0889114	1.13959	0.416544	0.421879	1.04579	0.144966	0.124385	1.12978	0.0157264	0.0281502	1.22182	0.843272	0.903675	1.01852	60386990	69113000	66637020	80419060	69179000	66345960	73635970	81057050	67193020	75308000	82767050	81384980	63590000	77255000	59816000	56.5	26.968	0	85.799
P77488	P77488	1-deoxy-D-xylulose-5-phosphate synthase	dxs	sp|P77488|DXS_ECOLI 1-deoxy-D-xylulose-5-phosphate synthase OS=Escherichia coli (strain K12) OX=83333 GN=dxs PE=1 SV=3	14	14	0.254556	0.815656	0.923229	0.000949705	0.0020712	0.596839	0.00729534	0.010186	0.721065	0.00352708	0.00607619	0.722091	0.457465	0.624754	0.816967	0.0472483	0.0655186	0.84975	117269900	135010000	138070000	114400000	118130000	127290000	96285980	92535940	92374960	137090000	65541970	132660000	108600000	106390000	116090000	31.8	67.616	0	51.951
P69222	P69222	Translation initiation factor IF-1	infA	sp|P69222|IF1_ECOLI Translation initiation factor IF-1 OS=Escherichia coli (strain K12) OX=83333 GN=infA PE=1 SV=2	5	5	0.255055	0.81544	1.1207	0.0744218	0.0531536	1.24266	0.134525	0.103818	1.34911	0.271451	0.25477	0.878951	0.253395	0.314092	1.4214	0.0287982	0.0432814	1.38004	91620990	104810000	121970100	121160000	120650000	112780000	85818980	103920000	89178970	104990100	242980000	131850100	132790000	147180100	157509900	77.8	8.2495	0	185.49
P64604	P64604	Probable phospholipid ABC transporter-binding protein MlaD	mlaD	sp|P64604|MLAD_ECOLI Intermembrane phospholipid transport system binding protein MlaD OS=Escherichia coli (strain K12) OX=83333 GN=mlaD PE=1 SV=1	10	10	0.255242	0.814677	1.0955	0.0160185	0.0163231	1.259	0.000524425	0.00347644	1.69966	0.00786253	0.0100036	1.27871	0.304326	0.392555	1.49964	0.0399507	0.0576	1.30834	155110100	144910000	138200000	172069900	141920100	167240000	200830000	178960000	180710100	172400100	429939900	141340000	173280000	225230100	178250000	66.7	19.576	0	173.24
P36659	P36659	Curved DNA-binding protein	cbpA	sp|P36659|CBPA_ECOLI Curved DNA-binding protein OS=Escherichia coli (strain K12) OX=83333 GN=cbpA PE=1 SV=2	15	15	0.256014	0.816108	1.05684	3.29772e-05	0	2.14354	0.000130301	0.00124731	2.33628	0.0175669	0.0196152	1.27376	0.00810063	0.0166582	1.1989	0.0173802	0.0286209	1.19283	218489900	238440200	212640000	224860000	240170100	242129900	292790100	256770000	304519800	272939800	268380100	260610000	277070000	269869900	251450100	51.3	34.455	0	97.492
P20605	P20605	Probable adenosine monophosphate-protein transferase fic	fic	sp|P20605|FIC_ECOLI Probable protein adenylyltransferase Fic OS=Escherichia coli (strain K12) OX=83333 GN=fic PE=1 SV=1	9	9	0.256174	0.815724	1.11661	0.000222239	0	2.51647	0.000513783	0.00349474	2.04899	0.000558502	0.00208247	1.6262	0.58108	0.76824	1.1008	0.00958442	0.0197706	2.05366	70928990	74844970	77397000	81184020	73260950	96176950	119889900	130370000	113050000	63260960	109130100	79388040	131629900	207030100	130589900	57.5	22.96	0	73.938
P0AFV4	P0AFV4	Murein DD-endopeptidase MepS/Murein LD-carboxypeptidase	mepS	sp|P0AFV4|MEPS_ECOLI Murein DD-endopeptidase MepS/Murein LD-carboxypeptidase OS=Escherichia coli (strain K12) OX=83333 GN=mepS PE=1 SV=1	4	4	0.256533	0.81582	4.49093	0.696949	0.790765	1.88886	0.147457	0.115685	8.13335	0.605213	0.703996	0.513229	0.0905096	0.11889	13.9027	0.273417	0.307739	4.91023	1374708	48930010	1987992	23550000	25015990	20558990	1362907	4756576	2788520	44485030	138790000	58199990	54445980	32409020	8971704	22.9	21.04	0.0037471	2.0222
P0AG51	P0AG51	50S ribosomal protein L30	rpmD	sp|P0AG51|RL30_ECOLI 50S ribosomal protein L30 OS=Escherichia coli (strain K12) OX=83333 GN=rpmD PE=1 SV=2	5	5	0.257308	0.817782	1.08566	0.0039555	0.00470383	1.46637	0.138548	0.107997	1.30531	0.0425652	0.0407741	1.33153	0.902469	0.959713	1.02184	0.0399048	0.0576754	1.40558	1796501000	2194600000	1944200000	2164100000	2051400000	2209401000	2258300000	2728302000	2937000000	1568201000	2674598000	1949899000	2384301000	3325698000	2684401000	57.6	6.5417	0	20.519
P0AFK6	P0AFK6	Spermidine/putrescine transport system permease protein PotC	potC	sp|P0AFK6|POTC_ECOLI Spermidine/putrescine transport system permease protein PotC OS=Escherichia coli (strain K12) OX=83333 GN=potC PE=3 SV=1	2	2	0.257955	0.817931	0.774312	0.144753	0.102726	0.765201	0.739472	0.81748	0.893488	0.268681	0.252053	0.903363	0.0524038	0.070174	1.40025	0.0509318	0.0692419	0.503648	2284301	2557199	2384301	1272601	2319800	2190201	2400701	2263501	1889500	2671500	3618099	3956001	1438999	1659055	745315	8.3	29.111	0.00049751	3.0213
P24173	P24173	Lipopolysaccharide heptosyltransferase 1	rfaC	sp|P24173|RFAC_ECOLI Lipopolysaccharide heptosyltransferase 1 OS=Escherichia coli (strain K12) OX=83333 GN=rfaC PE=1 SV=1	4	4	0.258102	0.816887	0.69804	0.106764	0.0744314	1.4873	0.337011	0.311463	1.29704	0.642755	0.745056	0.873246	0.593434	0.777782	0.874078	0.608553	0.717494	1.16923	4025000	2145699	3521598	2091401	1590799	3109302	1862600	3191199	3407299	3476399	2644001	2209699	2674100	5399803	3366801	15	35.543	0.000499	3.0846
P0ABU2	P0ABU2	Ribosome-binding ATPase YchF	ychF	sp|P0ABU2|YCHF_ECOLI Ribosome-binding ATPase YchF OS=Escherichia coli (strain K12) OX=83333 GN=ychF PE=1 SV=2	14	14	0.258516	0.81723	1.05043	0.0445815	0.0343636	1.14507	0.0229253	0.0242237	0.911381	0.00820351	0.0100741	1.24168	0.00247613	0.00416931	1.27557	0.30328	0.339431	1.0395	166829900	161960100	174960000	171699900	187120100	170540000	193460000	212850000	219780000	212769900	204630000	225350100	167250000	174749900	181680000	49.9	39.667	0	71.054
P0A7Z0	P0A7Z0	Ribose-5-phosphate isomerase A	rpiA	sp|P0A7Z0|RPIA_ECOLI Ribose-5-phosphate isomerase A OS=Escherichia coli (strain K12) OX=83333 GN=rpiA PE=1 SV=1	12	12	0.261142	0.823169	1.05721	0.0177491	0.0169946	1.2791	0.00113312	0.00442034	1.50651	0.00287784	0.00560614	1.35616	0.196373	0.238584	1.38686	0.199532	0.224435	1.10251	1205299000	1278800000	1108500000	1259600000	1245499000	1286900000	1662100000	1651500000	1552500000	1443200000	2491499000	1267499000	1214500000	1435000000	1313799000	53.4	22.86	0	323.31
P0A6B7	P0A6B7	Cysteine desulfurase IscS	iscS	sp|P0A6B7|ISCS_ECOLI Cysteine desulfurase IscS OS=Escherichia coli (strain K12) OX=83333 GN=iscS PE=1 SV=1	26	26	0.26176	0.823194	0.951294	0.0296583	0.0259846	0.891504	0.00989169	0.0130931	0.813077	0.0870949	0.0744647	1.08621	0.159974	0.198973	1.28716	0.0948803	0.113574	0.934097	1340900000	1434099000	1409200000	1250700000	1332901000	1399401000	1553800000	1424700000	1568800000	2104301000	1343100000	2044699000	1336000000	1331699000	1241399000	68.8	45.089	0	323.31
P37005	P37005	Uncharacterized tRNA/rRNA methyltransferase LasT	lasT	sp|P37005|LAST_ECOLI Uncharacterized tRNA/rRNA methyltransferase LasT OS=Escherichia coli (strain K12) OX=83333 GN=lasT PE=3 SV=2	5	5	0.262422	0.823846	0.879841	0.14483	0.102753	0.812514	0.122529	0.0960592	0.828466	0.336693	0.331465	0.864642	0.429192	0.590263	0.896898	0.870631	0.923698	0.976496	26597010	30484010	35324020	24648990	29710010	26636980	25491990	22523990	32242990	27335980	23410000	32290000	27635010	37111010	26003010	25.4	25.259	0	6.8897
P64455	P64455	Uncharacterized protein YdcY	ydcY	sp|P64455|YDCY_ECOLI Uncharacterized protein YdcY OS=Escherichia coli (strain K12) OX=83333 GN=ydcY PE=1 SV=1	2	2	0.262798	0.824065	1.19219	0.0967806	0.0684967	1.345	0.0698252	0.0576812	1.65774	0.125235	0.105766	1.31055	0.0964644	0.12562	2.08453	0.45862	0.534129	1.27722	18217000	20004990	23990010	29502990	24749010	20289000	22074010	32769990	27205000	26219010	80270020	37626980	15054000	39180980	30883010	13	8.7998	0.0005071	3.5445
P76569	P76569	Uncharacterized protein YfgD	yfgD	sp|P76569|YFGD_ECOLI Uncharacterized protein YfgD OS=Escherichia coli (strain K12) OX=83333 GN=yfgD PE=1 SV=1	7	7	0.262968	0.823422	1.19769	0.327568	0.27746	1.14885	0.00111828	0.00360544	2.50723	0.71827	0.818665	1.05843	0.192888	0.233719	1.89535	0.0280022	0.0424901	1.81243	28125000	19953010	24654990	34231020	28248010	24582990	21237000	25102990	30773010	29901010	100500000	31349010	32842980	53350020	47012020	71.4	13.398	0	145.93
P25746	P25746	High frequency lysogenization protein HflD	hflD	sp|P25746|HFLD_ECOLI High frequency lysogenization protein HflD OS=Escherichia coli (strain K12) OX=83333 GN=hflD PE=1 SV=1	6	6	0.263255	0.82357	0.948856	0.003867	0.0047619	1.37762	0.672607	0.760752	1.04338	0.000910915	0.00278049	1.29032	0.238789	0.296948	1.17779	0.787414	0.861319	1.04213	78974020	75871030	83464050	72531020	79808980	73804970	101419900	104140000	101720100	76586970	114080000	93519980	65027040	82301990	105760000	33.3	22.947	0	58.599
P0A7Z4	P0A7Z4	DNA-directed RNA polymerase subunit alpha	rpoA	sp|P0A7Z4|RPOA_ECOLI DNA-directed RNA polymerase subunit alpha OS=Escherichia coli (strain K12) OX=83333 GN=rpoA PE=1 SV=1	23	23	0.26328	0.822359	1.03516	0.146	0.10361	0.964016	0.0204223	0.0213033	1.10221	0.230247	0.209673	0.97327	0.26462	0.330912	0.807691	0.031905	0.0468205	1.10208	3164499000	3192802000	3330600000	3335099000	3471498000	3224000000	3166500000	3185702000	3075499000	3134399000	1880001000	3009000000	3708099000	3395198000	3577899000	76.6	36.511	0	323.31
P0A9C3	P0A9C3	Aldose 1-epimerase	galM	sp|P0A9C3|GALM_ECOLI Aldose 1-epimerase OS=Escherichia coli (strain K12) OX=83333 GN=galM PE=1 SV=1	13	13	0.263791	0.822209	1.04172	0.611082	0.694023	0.978444	0.945875	0.969597	1.0034	0.120448	0.101921	0.932963	0.928668	0.969508	1.00741	0.00105435	0.00916883	0.786362	504259700	547019700	531639900	527369700	558469700	562880200	468420300	511689900	496850000	557830000	459630100	584760300	422670100	402370200	419290100	52	38.19	0	141.25
P26616	P26616	NAD-dependent malic enzyme	maeA	sp|P26616|MAO1_ECOLI NAD-dependent malic enzyme OS=Escherichia coli (strain K12) OX=83333 GN=maeA PE=1 SV=4	18	18	0.264093	0.823026	1.03738	5.00687e-05	0	1.19568	0.00146886	0.00580923	1.1795	0.00387149	0.00654795	1.25813	0.488748	0.667408	0.859138	0.0148004	0.0253511	1.07931	493650200	495329700	494149700	492219700	541399900	506190000	576370300	642460000	649830300	514069900	285109900	522790100	514990300	537980000	548330300	38.4	63.197	0	173.71
P0AE18	P0AE18	Methionine aminopeptidase	map	sp|P0AE18|MAP1_ECOLI Methionine aminopeptidase OS=Escherichia coli (strain K12) OX=83333 GN=map PE=1 SV=1	13	13	0.264407	0.823127	1.06616	0.0257107	0.0238937	0.82693	0.354541	0.333516	0.932913	0.481216	0.532798	0.972457	0.28136	0.352562	1.26792	0.250317	0.27973	0.900796	356860200	369070200	330890100	361610000	361240100	404319700	341450000	333300100	352159800	566539900	307890000	509259700	305690000	363400000	286750100	54.9	29.33	0	165.31
P0ACI3	P0ACI3	Xylose operon regulatory protein	xylR	sp|P0ACI3|XYLR_ECOLI Xylose operon regulatory protein OS=Escherichia coli (strain K12) OX=83333 GN=xylR PE=1 SV=1	18	18	0.264772	0.823702	1.03748	0.633886	0.721767	0.983691	0.0588423	0.0498018	1.18909	0.00533536	0.00853498	0.881267	0.197336	0.239633	0.77889	0.0317622	0.0465086	0.876147	635820100	618919800	637260000	620360000	667989600	675790500	543920200	544469900	579559700	571239900	355670000	583240000	529669900	532310200	598200400	49.5	44.869	0	190.68
P0A9T4	P0A9T4	Protein tas	tas	sp|P0A9T4|TAS_ECOLI Protein tas OS=Escherichia coli (strain K12) OX=83333 GN=tas PE=1 SV=1	13	13	0.265688	0.825361	1.10896	0.00761128	0.00822937	1.55567	0.0511645	0.0449771	1.23297	0.0361552	0.0340542	1.30201	0.24075	0.299894	1.21998	0.0647361	0.0820461	1.28307	114749900	130129900	148400100	136450100	150679900	146990100	179270000	174390100	156450000	184600000	124360100	175270000	149800000	166650000	187500000	39	38.499	0	161.45
P45464	P45464	Penicillin-binding protein activator LpoA	lpoA	sp|P45464|LPOA_ECOLI Penicillin-binding protein activator LpoA OS=Escherichia coli (strain K12) OX=83333 GN=lpoA PE=1 SV=1	25	25	0.265859	0.825242	1.07992	0.00656287	0.00683852	1.39901	0.00423197	0.00741818	1.82372	0.573777	0.662606	0.968657	0.426271	0.587989	1.37157	0.0158862	0.0269591	1.52818	333300100	397710200	366800000	418550100	386190200	378839900	353039900	347670200	360040000	343190200	1014500000	360330000	466769700	636140400	584380000	49.9	72.824	0	323.31
P0AB03	P0AB03	Uncharacterized protein YcbJ	ycbJ	sp|P0AB03|YCBJ_ECOLI Uncharacterized protein YcbJ OS=Escherichia coli (strain K12) OX=83333 GN=ycbJ PE=4 SV=1	3	3	0.266158	0.824914	0.674439	0.107787	0.0752313	0.811475	0.275446	0.246057	0.803867	0.171556	0.149952	0.817003	0.658291	0.826244	1.13936	0.363486	0.417771	1.11761	3764201	3885301	5148603	1609704	4071999	3524202	3944699	3335099	3121299	6424397	2895000	5988097	4866698	4984403	4333199	9.1	34.487	0.00698	1.9099
P06611	P06611	Vitamin B12 import ATP-binding protein BtuD	btuD	sp|P06611|BTUD_ECOLI Vitamin B12 import ATP-binding protein BtuD OS=Escherichia coli (strain K12) OX=83333 GN=btuD PE=1 SV=1	4	4	0.266702	0.825349	1.21389	0.0198569	0.0194328	2.12253	0.0072483	0.00982363	2.02054	0.0115345	0.013759	1.82185	0.134949	0.167213	1.37596	0.371648	0.42537	1.23532	4395200	6692104	6033800	6738599	5965199	7897204	9943401	9572295	11275000	7863001	9348500	6289603	6460997	9560495	5416097	20.9	27.081	0	4.5813
P08506	P08506	D-alanyl-D-alanine carboxypeptidase DacC	dacC	sp|P08506|DACC_ECOLI D-alanyl-D-alanine carboxypeptidase DacC OS=Escherichia coli (strain K12) OX=83333 GN=dacC PE=1 SV=2	26	25	0.26711	0.825028	1.05371	0.0552525	0.0404355	0.941403	0.00680763	0.00932653	1.07473	0.000953643	0.0031746	0.840848	0.0254638	0.0401036	1.22581	0.00425692	0.01352	1.17158	1300499000	1300800000	1338900000	1291700000	1385399000	1480800000	1071800000	1103700000	1138300000	1569499000	1797601000	1478699000	1534800000	1474599000	1609400000	69.5	43.608	0	323.31
P29131	P29131	Cell division protein FtsN	ftsN	sp|P29131|FTSN_ECOLI Cell division protein FtsN OS=Escherichia coli (strain K12) OX=83333 GN=ftsN PE=1 SV=3	18	18	0.267621	0.825559	0.835328	0.0165353	0.016457	1.71072	0.0868114	0.0705749	1.39043	0.609877	0.709497	1.07632	0.24378	0.302882	1.31501	0.342527	0.389648	1.2113	268059900	211209900	173319900	201480000	171569900	165459900	213369900	232010000	247160100	243850200	384439900	238030100	322319900	259649800	208389900	56.1	35.793	0	250.37
P0A9R4	P0A9R4	2Fe-2S ferredoxin	fdx	sp|P0A9R4|FER_ECOLI 2Fe-2S ferredoxin OS=Escherichia coli (strain K12) OX=83333 GN=fdx PE=1 SV=2	4	4	0.267628	0.824365	1.14407	0.286823	0.23199	0.923347	0.138971	0.10871	1.24582	0.0290218	0.0286812	0.756544	0.751084	0.886808	0.928642	0.271165	0.305471	1.27059	41444020	37277020	38927980	54186030	38594020	43064020	31486990	25398000	32563980	31401980	55637020	27566990	37901980	70889990	45913030	36	12.331	0	64.175
P09551	P09551	Lysine/arginine/ornithine-binding periplasmic protein	argT	sp|P09551|ARGT_ECOLI Lysine/arginine/ornithine-binding periplasmic protein OS=Escherichia coli (strain K12) OX=83333 GN=argT PE=1 SV=3	28	27	0.268532	0.826231	1.09591	0.979355	0.990544	1.00154	0.0346762	0.0325831	1.3984	0.30333	0.291888	1.06497	0.0136737	0.0263459	2.08937	0.0728365	0.0886469	1.21225	8685999000	10136990000	9700700000	11179010000	9343692000	10762990000	9807708000	10666010000	9862294000	17368000000	27738990000	16170990000	10323990000	12923000000	11405000000	81.2	27.991	0	323.31
P77243	P77243	2-methylcitrate dehydratase	prpD	sp|P77243|PRPD_ECOLI 2-methylcitrate dehydratase OS=Escherichia coli (strain K12) OX=83333 GN=prpD PE=1 SV=3	19	19	0.269382	0.827377	0.909398	2.62676e-05	0	0.317702	2.20497e-05	0	0.245761	0.0649095	0.057286	0.893036	0.00147616	0.00320548	0.267971	0.00143944	0.00997753	0.448829	493810100	470500100	544919900	406030100	473150000	495629700	453940200	438000100	453510100	146770100	98003990	169370100	265990100	192960100	223030000	47.2	53.951	0	178.53
P0AEE3	P0AEE3	Serine endoprotease DegS	degS	sp|P0AEE3|DEGS_ECOLI Serine endoprotease DegS OS=Escherichia coli (strain K12) OX=83333 GN=degS PE=1 SV=1	8	8	0.269487	0.826184	1.10837	0.199344	0.145007	0.893056	0.691118	0.777078	0.963525	0.44409	0.478279	0.937322	0.0645497	0.0872774	1.4366	0.171611	0.195667	1.13865	31875010	38150980	40305010	38736990	43723010	39403000	34639980	35825000	32525000	50090030	66529010	43606980	43202990	39032020	42908980	27.6	37.581	0	18.905
P28248	P28248	Deoxycytidine triphosphate deaminase	dcd	sp|P28248|DCD_ECOLI dCTP deaminase OS=Escherichia coli (strain K12) OX=83333 GN=dcd PE=1 SV=1	8	8	0.269598	0.825145	1.16075	0.373041	0.334232	0.861046	0.966321	0.980583	1.00599	0.169814	0.147865	1.251	0.0227172	0.0362645	2.65242	0.406155	0.470679	0.911678	52290000	58688010	73357970	65251040	67823040	79554040	76311950	88782990	65051980	121440000	266670000	129719900	54632010	55589010	56169970	37.3	21.249	0	19.206
P0ADU5	P0ADU5	Protein YgiW	ygiW	sp|P0ADU5|YGIW_ECOLI Protein YgiW OS=Escherichia coli (strain K12) OX=83333 GN=ygiW PE=1 SV=1	9	9	0.270384	0.826299	1.07784	0.00069818	0.00233577	1.89065	0.000320353	0.0014321	2.24886	0.000240624	0.00203077	2.10215	0.0960052	0.124767	1.59803	0.985433	0.992227	1.00281	428880000	516489700	473499800	514920200	485559900	525289800	943550300	1000900000	1031700000	588129800	1142800000	636839700	457710200	605230200	381820100	49.2	14.011	0	242.7
P0AFD6	P0AFD6	NADH-quinone oxidoreductase subunit I	nuoI	sp|P0AFD6|NUOI_ECOLI NADH-quinone oxidoreductase subunit I OS=Escherichia coli (strain K12) OX=83333 GN=nuoI PE=1 SV=1	11	11	0.270726	0.826284	0.842886	0.000290012	0	0.559309	0.00929266	0.0121032	0.78997	0.000683838	0.00187037	0.657223	0.453939	0.620137	0.873482	0.0207799	0.0322151	0.709337	139100100	152550100	155560000	96896010	142759900	142900000	98459960	93033980	102300000	164730000	95971950	139149900	89828000	108860000	120480100	44.4	20.538	0	230.37
P05459	P05459	Erythronate-4-phosphate dehydrogenase	pdxB	sp|P05459|PDXB_ECOLI Erythronate-4-phosphate dehydrogenase OS=Escherichia coli (strain K12) OX=83333 GN=pdxB PE=2 SV=2	21	21	0.270864	0.825656	1.07882	0.00553734	0.00592547	1.33193	0.0356204	0.0337085	1.21143	0.00301783	0.00554937	1.3867	0.346387	0.456352	1.22243	0.0251547	0.0374643	1.33862	220410000	254729800	257609900	261070100	278589900	249690000	343409900	335839900	334410100	352850000	207210000	361360000	319859900	293700100	369300100	57.7	41.367	0	146.25
P0AAS7	P0AAS7	Uncharacterized protein YbcJ	ybcJ	sp|P0AAS7|YBCJ_ECOLI Uncharacterized protein YbcJ OS=Escherichia coli (strain K12) OX=83333 GN=ybcJ PE=1 SV=1	5	5	0.271786	0.828292	0.904476	0.00216369	0.00306695	1.51783	0.00213023	0.00637037	1.492	0.598654	0.695166	0.948442	0.416658	0.576718	0.890517	0.00151557	0.0103043	1.63197	49676990	59513020	56421010	44357000	52987020	52513010	47633970	49246000	60666980	52110020	57753970	39141010	84660970	89926980	95230030	94.3	7.3895	0	7.0563
P32680	P32680	Uncharacterized protein YjaG	yjaG	sp|P32680|YJAG_ECOLI Uncharacterized protein YjaG OS=Escherichia coli (strain K12) OX=83333 GN=yjaG PE=4 SV=1	4	4	0.272065	0.828383	0.81908	0.123075	0.0857504	0.228118	0.375347	0.361197	0.603972	0.132159	0.11189	0.368897	0.684523	0.846164	0.897404	0.441814	0.5144	1.20061	12202010	17855000	16464990	15360000	10759000	11928000	2039168	8180743	10795000	11996000	10252000	21080010	18926000	13264000	24730000	26	22.612	0	7.2742
P00370	P00370	NADP-specific glutamate dehydrogenase	gdhA	sp|P00370|DHE4_ECOLI NADP-specific glutamate dehydrogenase OS=Escherichia coli (strain K12) OX=83333 GN=gdhA PE=1 SV=1	23	23	0.272103	0.827201	0.958455	0.000248721	0	0.541686	7.76683e-05	0	0.492325	0.293102	0.281415	1.03864	0.132511	0.164578	0.824352	3.93725e-05	0	0.564132	872460000	895849900	892959900	799080100	890790300	863300400	911240100	879900200	975300000	799149800	596459800	820240200	482830300	528659700	490890100	58.8	48.581	0	323.31
P31554	P31554	LPS-assembly protein LptD	lptD	sp|P31554|LPTD_ECOLI LPS-assembly protein LptD OS=Escherichia coli (strain K12) OX=83333 GN=lptD PE=1 SV=2	44	44	0.272193	0.826023	1.05311	0.000193364	0	1.46114	0.405315	0.403532	1.09606	0.00411389	0.0069755	1.21912	0.287173	0.361812	1.6466	0.0114098	0.0209126	1.47319	1278499000	1282900000	1241001000	1433500000	1324700000	1251900000	1466300000	1536800000	1636700000	1421800000	4701898000	1359301000	1731001000	2219900000	1693600000	69	89.67	0	323.31
P39099	P39099	Periplasmic pH-dependent serine endoprotease DegQ	degQ	sp|P39099|DEGQ_ECOLI Periplasmic pH-dependent serine endoprotease DegQ OS=Escherichia coli (strain K12) OX=83333 GN=degQ PE=1 SV=1	24	24	0.272453	0.825735	1.09378	0.00376606	0.00482143	1.4763	0.00584487	0.00881884	1.43957	0.271201	0.254596	1.07416	0.126188	0.159827	1.38976	0.00298803	0.0143658	1.56594	231780100	255920100	280830100	298019800	284470200	257119900	270200100	274460000	278399900	288880200	488060200	317140200	368179800	422670100	411040200	62	47.204	0	228.31
P0AEG1	P0AEG1	Dipeptide transport system permease protein DppC	dppC	sp|P0AEG1|DPPC_ECOLI Dipeptide transport system permease protein DppC OS=Escherichia coli (strain K12) OX=83333 GN=dppC PE=1 SV=1	4	4	0.272939	0.826063	0.891639	5.95948e-06	0	0.474097	0.00613622	0.00908319	0.606708	0.056428	0.051709	0.869131	0.222916	0.274676	0.783441	0.307974	0.345717	0.85605	78177030	81367020	77133960	64432030	84005050	64259000	75357000	63501030	67316980	47909970	57944020	84987980	54783980	65148980	86240040	20.3	32.308	0	10.309
P0AGA6	P0AGA6	Transcriptional regulatory protein UhpA	uhpA	sp|P0AGA6|UHPA_ECOLI Transcriptional regulatory protein UhpA OS=Escherichia coli (strain K12) OX=83333 GN=uhpA PE=1 SV=1	5	5	0.27333	0.82627	1.10953	0.000174143	0	0.579075	0.00392718	0.00746218	0.591047	0.00130021	0.00276817	0.458499	5.59278e-06	0	0.444796	0.0305224	0.0453741	1.40078	56849980	53913990	55454970	69574960	52854020	63133960	25858000	29691990	21338000	25638000	24255990	24052000	70056960	95081970	70133970	32.7	20.889	0	94.421
P09147	P09147	UDP-glucose 4-epimerase	galE	sp|P09147|GALE_ECOLI UDP-glucose 4-epimerase OS=Escherichia coli (strain K12) OX=83333 GN=galE PE=1 SV=1	12	12	0.273413	0.825263	1.06179	0.00816526	0.00855191	0.675088	0.000614711	0.00320773	0.434449	0.0392079	0.0377564	1.10516	2.48028e-06	0	0.336183	0.000233959	0.0039403	0.536281	124970000	137210000	131390000	133060000	134790000	150370100	140270000	144630000	149900100	43779000	43831990	44609000	64758000	74234970	72282040	43.2	37.265	0	73.225
P77526	P77526	Disulfide-bond oxidoreductase YfcG	yfcG	sp|P77526|YFCG_ECOLI Disulfide-bond oxidoreductase YfcG OS=Escherichia coli (strain K12) OX=83333 GN=yfcG PE=1 SV=1	6	6	0.273729	0.82611	0.839885	0.100127	0.0700132	1.31088	0.0473209	0.0428242	1.31742	0.0223667	0.0240152	1.43344	0.0571011	0.0767021	1.5033	0.131512	0.152629	1.22615	120000000	90831980	89166000	75299040	101330000	75465980	143430000	135199900	147620100	118720100	155470000	178890000	132700000	120439900	112100000	27	24.516	0	26.825
P0A7K2	P0A7K2	50S ribosomal protein L7/L12	rplL	sp|P0A7K2|RL7_ECOLI 50S ribosomal protein L7/L12 OS=Escherichia coli (strain K12) OX=83333 GN=rplL PE=1 SV=2	10	10	0.274043	0.825989	0.951163	0.0174692	0.016709	1.16898	0.745775	0.823068	1.04004	0.0737798	0.0630314	0.890336	0.242704	0.302217	0.747949	0.299984	0.333952	1.11105	3851898000	3395400000	3578698000	3376599000	3377099000	3532098000	3017099000	3271401000	3346799000	2141700000	4090301000	2235598000	3427599000	4170301000	4490901000	61.2	12.295	0	263.76
P05827	P05827	HTH-type transcriptional regulator IlvY	ilvY	sp|P05827|ILVY_ECOLI HTH-type transcriptional regulator IlvY OS=Escherichia coli (strain K12) OX=83333 GN=ilvY PE=3 SV=1	5	5	0.274397	0.825901	1.32886	0.0900951	0.0636366	1.59566	0.211548	0.177882	1.37752	0.53564	0.61337	1.19661	0.763067	0.890206	1.07746	0.223169	0.248804	1.47439	2358000	4760099	3656400	3936598	4518900	5413799	3727199	5735503	3289400	3160001	3570514	4549899	4504602	7182698	4065399	19.5	33.204	0	6.2765
P0AED0	P0AED0	Universal stress protein A	uspA	sp|P0AED0|USPA_ECOLI Universal stress protein A OS=Escherichia coli (strain K12) OX=83333 GN=uspA PE=1 SV=2	8	8	0.274702	0.825842	1.04976	0.0632363	0.0460421	0.840893	0.0842145	0.0691977	0.928924	0.00103627	0.00305344	0.736057	0.0831162	0.111344	0.667017	0.452442	0.526728	0.921989	642839700	598729700	640310400	646069800	631449700	698839700	450300000	487559800	447640200	374810100	588770100	331419800	513360200	697370400	539529900	77.8	16.066	0	323.31
P08401	P08401	Sensor protein CreC	creC	sp|P08401|CREC_ECOLI Sensor protein CreC OS=Escherichia coli (strain K12) OX=83333 GN=creC PE=1 SV=2	6	6	0.274832	0.82508	0.542263	0.198703	0.144532	0.811577	0.590656	0.668811	0.82212	0.287961	0.275342	0.827087	0.504747	0.68441	0.489885	0.841712	0.902497	1.02553	12709010	12939000	17389990	13471000	11269990	3003437	12494000	13836000	9359506	14052000	1022881	23390010	16301010	14279000	13251000	13.7	52.176	0	4.2084
P0A6C8	P0A6C8	Acetylglutamate kinase	argB	sp|P0A6C8|ARGB_ECOLI Acetylglutamate kinase OS=Escherichia coli (strain K12) OX=83333 GN=argB PE=1 SV=1	13	13	0.274971	0.824596	0.888765	0.154836	0.110665	0.86472	0.00397738	0.00738462	0.65811	0.0224643	0.0242371	0.766934	0.00181503	0.00307895	0.568001	0.962294	0.978128	0.996531	534829900	658599700	610989800	466600100	544909900	594240300	491470000	463059700	426590300	365590200	346209800	311590200	572560000	584060300	636890200	61.2	27.159	0	174.59
P0A9S1	P0A9S1	Lactaldehyde reductase	fucO	sp|P0A9S1|FUCO_ECOLI Lactaldehyde reductase OS=Escherichia coli (strain K12) OX=83333 GN=fucO PE=1 SV=2	10	10	0.275339	0.824516	1.1596	3.19428e-05	0	0.0737499	6.129e-05	0	0.02445	0.00032605	0.00172549	0.258172	0.000709112	0.00508696	0.0326796	0.000176661	0.00243137	0.0346115	193580000	231000000	270100100	239960000	260129800	301709900	67241020	57966010	53323010	10974000	3724199	10314010	10584010	5030698	9405501	29.6	40.513	0	294.84
P60472	P60472	Ditrans,polycis-undecaprenyl-diphosphate synthase ((2E,6E)-farnesyl-diphosphate specific)	ispU	sp|P60472|UPPS_ECOLI Ditrans,polycis-undecaprenyl-diphosphate synthase ((2E,6E)-farnesyl-diphosphate specific) OS=Escherichia coli (strain K12) OX=83333 GN=ispU PE=1 SV=1	3	3	0.275423	0.823804	1.18265	0.253327	0.194946	0.720233	0.235852	0.199803	0.797253	0.467466	0.512986	0.905655	0.916604	0.965802	0.976995	0.618379	0.726701	1.07329	15196010	22802010	16609990	22287990	19178990	22271000	15910010	16384000	16401010	17646000	13025010	23352010	18104990	21012010	18705010	12.3	28.444	0.00050787	3.5947
P0A8Y5	P0A8Y5	Sugar phosphatase YidA	yidA	sp|P0A8Y5|YIDA_ECOLI Sugar phosphatase YidA OS=Escherichia coli (strain K12) OX=83333 GN=yidA PE=1 SV=1	11	11	0.275687	0.823586	1.10128	0.00756393	0.00791024	1.63675	0.0400086	0.0367298	1.2974	0.00620707	0.00832749	1.75007	0.000951976	0.00421622	1.78828	0.0585664	0.076181	1.38535	42391020	36698000	34098000	38150980	43887020	42314980	56128990	75010000	67531000	69706990	65517020	66423980	42066990	57709010	58094980	50.4	29.721	0	15.48
P24555	P24555	Protease 2	ptrB	sp|P24555|PTRB_ECOLI Protease 2 OS=Escherichia coli (strain K12) OX=83333 GN=ptrB PE=1 SV=2	4	4	0.275768	0.822944	0.842184	0.953566	0.976981	1.00851	0.338423	0.313031	1.11978	0.380546	0.392896	1.07214	0.354824	0.469895	1.43074	0.247909	0.277212	0.871787	11905000	13103990	13999010	8462404	12461990	12370010	14429010	14881990	12534000	31087010	9787296	21022010	10046000	13493990	10674000	6.4	79.49	0	35.607
P07102	P07102	Periplasmic AppA protein;Phosphoanhydride phosphohydrolase;4-phytase	appA	sp|P07102|PPA_ECOLI Periplasmic AppA protein OS=Escherichia coli (strain K12) OX=83333 GN=appA PE=1 SV=2	6	6	0.275795	0.821796	0.684869	0.0116006	0.0119213	3.69789	0.0307372	0.0293362	2.80701	0.307622	0.296458	0.702447	0.167065	0.205531	0.606527	0.325998	0.367728	1.40551	28169990	10956000	24883000	12823000	12937000	14871000	13357000	12782000	15591010	11881000	11759010	12265000	29375990	24142980	30064990	17.8	47.056	0	8.6478
P0C018	P0C018	50S ribosomal protein L18	rplR	sp|P0C018|RL18_ECOLI 50S ribosomal protein L18 OS=Escherichia coli (strain K12) OX=83333 GN=rplR PE=1 SV=1	7	7	0.276002	0.820986	1.09137	0.0887161	0.062797	1.18196	0.0673934	0.0562175	1.25567	0.760594	0.851103	1.02552	0.888862	0.953609	0.974602	0.109717	0.128081	1.25373	5385194000	6522093000	5797704000	6898792000	6415806000	5980501000	5663294000	5779796000	6709608000	4726804000	7937491000	5024303000	6729205000	8922200000	6683791000	59	12.769	0	141.06
P37613	P37613	PanD maturation factor	panM	sp|P37613|PANZ_ECOLI PanD regulatory factor OS=Escherichia coli (strain K12) OX=83333 GN=panZ PE=1 SV=1	2	2	0.276991	0.822531	0.6577	0.916575	0.954978	1.0714	0.400146	0.397345	1.70883	0.8973	0.947098	1.04442	0.0253946	0.039984	4.16021	0.31089	0.349711	1.92157	1561232	2226838	3160235	984946	1315979	2411555	1431398	2960090	2954136	13920000	4552998	12482000	1796012	3936806	11025270	24.4	14.505	0	5.8987
P22564	P22564	Non-specific ribonucleoside hydrolase RihC	rihC	sp|P22564|RIHC_ECOLI Non-specific ribonucleoside hydrolase RihC OS=Escherichia coli (strain K12) OX=83333 GN=rihC PE=1 SV=1	6	6	0.277414	0.822567	0.773565	0.00140161	0.00275325	0.126571	0.00141955	0.00586335	0.0197009	0.00524134	0.00841322	0.385443	0.00074908	0.00468	0.0392097	0.0013924	0.00977515	0.0361337	175420000	106339900	163630000	86569950	132480000	123200000	50213020	54221000	64199980	8306204	3064476	7228701	11274000	3133600	4076201	29.3	32.56	0	103.78
P0AA10	P0AA10	50S ribosomal protein L13	rplM	sp|P0AA10|RL13_ECOLI 50S ribosomal protein L13 OS=Escherichia coli (strain K12) OX=83333 GN=rplM PE=1 SV=1	10	10	0.277876	0.823096	0.918887	0.573838	0.643061	1.04131	0.237973	0.202008	1.10358	0.643712	0.745466	1.03372	0.0218535	0.0367832	0.710539	0.482258	0.563121	1.08179	3377398000	2815301000	2735399000	2776398000	2741300000	2651401000	3040902000	3108298000	3039599000	2347300000	1865700000	2130499000	2891698000	3728499000	3054000000	68.3	16.018	0	267.89
P0A968	P0A968	Cold shock-like protein CspD	cspD	sp|P0A968|CSPD_ECOLI Cold shock-like protein CspD OS=Escherichia coli (strain K12) OX=83333 GN=cspD PE=1 SV=1	3	3	0.277999	0.822449	1.15335	0.0846893	0.0594939	1.27849	0.00238097	0.00671392	2.0397	0.135786	0.115275	1.23458	0.550754	0.736878	0.880967	0.0151531	0.0260491	1.69152	306170100	367279900	289570000	385799800	310520100	417010200	335159900	452149900	404329900	256979900	398780100	217249900	470520000	667030300	502140200	78.4	7.9689	0	69.853
P0ABD8	P0ABD8	Biotin carboxyl carrier protein of acetyl-CoA carboxylase	accB	sp|P0ABD8|BCCP_ECOLI Biotin carboxyl carrier protein of acetyl-CoA carboxylase OS=Escherichia coli (strain K12) OX=83333 GN=accB PE=1 SV=1	6	6	0.279785	0.825527	1.10077	0.0351584	0.0288495	1.35794	9.85219e-05	0.00141463	1.79141	0.000889504	0.00283817	1.11268	0.0547717	0.0724371	1.7188	0.0123944	0.0212091	1.66322	363120000	363920200	354070100	451609800	398609900	346680200	396099800	399570100	407250000	566330200	909940000	461040200	535990100	757709900	530069900	44.9	16.687	0	58.263
P0A717	P0A717	Ribose-phosphate pyrophosphokinase	prs	sp|P0A717|KPRS_ECOLI Ribose-phosphate pyrophosphokinase OS=Escherichia coli (strain K12) OX=83333 GN=prs PE=1 SV=2	13	13	0.279837	0.824387	1.05606	0.0978425	0.0689251	1.1118	0.018834	0.0197094	1.20148	0.360673	0.364275	1.04756	0.00189126	0.0029434	1.3858	0.0346926	0.0512662	1.22987	365380000	371699800	419480300	402830000	407429800	408830000	393630000	407210100	408579900	532489700	543820300	523580000	428709900	497829700	496570200	50.8	34.218	0	323.31
P0ACN4	P0ACN4	HTH-type transcriptional repressor AllR	allR	sp|P0ACN4|ALLR_ECOLI HTH-type transcriptional repressor AllR OS=Escherichia coli (strain K12) OX=83333 GN=allR PE=1 SV=1	6	6	0.280506	0.825937	0.903666	0.0231689	0.0218016	0.801636	0.697302	0.782054	0.956486	0.0694825	0.0604084	0.861863	0.573413	0.760227	1.09287	0.112924	0.130731	0.872932	35375010	36069990	29856010	27259010	32294010	31934990	28820000	29359990	28823010	42208990	28242000	41713980	28897000	31132010	28167980	28.4	29.269	0	8.5123
Q46822	Q46822	Isopentenyl-diphosphate Delta-isomerase	idi	sp|Q46822|IDI_ECOLI Isopentenyl-diphosphate Delta-isomerase OS=Escherichia coli (strain K12) OX=83333 GN=idi PE=1 SV=1	5	5	0.281139	0.826419	0.697248	0.00199935	0.0027027	1.98994	0.00753972	0.0101398	1.6329	0.221033	0.201958	1.26778	0.00190447	0.00290683	1.80771	0.0134547	0.0228492	1.59875	14879000	16422990	16009010	15091000	6180099	14218000	16376010	17712000	27481980	30659020	30799990	24471990	22861990	31199990	22411000	34.6	20.508	0	4.7964
P0AB06	P0AB06	Uncharacterized protein YcbK	ycbK	sp|P0AB06|YCBK_ECOLI Uncharacterized protein YcbK OS=Escherichia coli (strain K12) OX=83333 GN=ycbK PE=3 SV=1	6	6	0.281357	0.825497	1.21639	0.212562	0.157222	0.220136	0.183398	0.148636	1.29302	0.434506	0.46492	0.429573	0.918617	0.966982	1.01181	0.0934942	0.111673	1.20117	36345000	39490980	40005010	54746980	34449990	54793030	32126010	58099970	2438566	33282010	37693000	47410990	40179020	52569970	47112010	34.1	20.354	0.00050378	3.3746
P39451	P39451	Alcohol dehydrogenase, propanol-preferring	adhP	sp|P39451|ADHP_ECOLI Alcohol dehydrogenase, propanol-preferring OS=Escherichia coli (strain K12) OX=83333 GN=adhP PE=1 SV=1	7	7	0.281777	0.825231	1.35478	0.022364	0.0214137	2.74381	0.00915905	0.0117117	3.00874	0.767594	0.857762	1.12789	0.0659992	0.0878256	2.06616	0.271934	0.305804	1.41465	8014501	16959010	14189010	20089010	16281000	14662000	17715000	20407990	7654001	22870990	20307010	36626020	13002010	20083010	20909010	28.6	35.379	0	27.271
P0A8G6	P0A8G6	NAD(P)H dehydrogenase (quinone)	wrbA	sp|P0A8G6|NQOR_ECOLI NAD(P)H dehydrogenase (quinone) OS=Escherichia coli (strain K12) OX=83333 GN=wrbA PE=1 SV=2	11	11	0.281802	0.824099	1.04346	0.000432503	0.00102326	1.40825	0.000143364	0.00119588	1.46049	0.000179267	0.0024	1.67454	0.0967082	0.125942	1.90388	0.000536178	0.00503704	1.65789	2171101000	2349700000	2302301000	2441302000	2420601000	2258100000	3977402000	3591501000	3860702000	3252702000	7836101000	3180000000	3489702000	4063700000	3774102000	61.6	20.845	0	323.31
P0ADK6	P0ADK6	Protein YibA	yibA	sp|P0ADK6|YIBA_ECOLI Protein YibA OS=Escherichia coli (strain K12) OX=83333 GN=yibA PE=1 SV=1	4	4	0.282323	0.824625	0.859851	0.00330372	0.00466041	0.479142	0.00171308	0.00587135	0.490164	0.720609	0.820788	1.05251	0.271604	0.340189	0.591932	0.648247	0.752649	0.885679	13326000	16272010	12961000	14583010	11758000	10420010	18581010	13518010	13046000	7622000	17565000	4353900	10833000	9095395	19816990	13.9	31.873	0	6.9685
P39177	P39177	Universal stress protein G	uspG	sp|P39177|USPG_ECOLI Universal stress protein UP12 OS=Escherichia coli (strain K12) OX=83333 GN=uspG PE=1 SV=2	8	8	0.282521	0.823858	0.846013	0.346459	0.300356	1.18571	0.0311909	0.0296968	1.58673	0.235676	0.215997	1.21236	0.442693	0.607882	1.28317	0.127091	0.148453	0.712964	556429800	626489600	407230000	408420000	448789800	468969900	574090400	646639700	681430100	587250300	1111599000	459460000	472569800	337439900	322629800	67.6	15.935	0	236.59
P32125	P32125	Molybdopterin-guanine dinucleotide biosynthesis adapter protein	mobB	sp|P32125|MOBB_ECOLI Molybdopterin-guanine dinucleotide biosynthesis adapter protein OS=Escherichia coli (strain K12) OX=83333 GN=mobB PE=1 SV=3	1	1	0.282646	0.823541	1.09326	0.113808	0.0791482	1.37285	0.554509	0.620555	1.11596	0.0331689	0.0316529	1.26296	0.586653	0.774052	0.833556	0.515634	0.608442	0.948545	7033101	8077004	7804599	7849696	7873695	9373202	9465503	10768990	8761903	3474566	9317898	7931104	6672103	6950602	8159000	7.4	19.363	0	8.6347
P0ACK2	P0ACK2	Putative aga operon transcriptional repressor	agaR	sp|P0ACK2|AGAR_ECOLI Putative aga operon transcriptional repressor OS=Escherichia coli (strain K12) OX=83333 GN=agaR PE=4 SV=1	6	6	0.28394	0.827509	0.840207	0.00354149	0.00480586	0.354149	0.0593594	0.0499487	0.573293	0.000553924	0.00209326	0.508913	0.0185969	0.03183	0.613281	0.000823402	0.00655882	0.519989	24984990	31129000	26362000	20832990	19829990	29438000	13658000	14243000	13892000	14543000	15639010	20794000	13643010	15039000	14050000	27.1	29.572	0	7.2206
P67910	P67910	ADP-L-glycero-D-manno-heptose-6-epimerase	hldD	sp|P67910|HLDD_ECOLI ADP-L-glycero-D-manno-heptose-6-epimerase OS=Escherichia coli (strain K12) OX=83333 GN=hldD PE=1 SV=1	21	21	0.284084	0.827204	1.08997	0.193148	0.140065	1.10686	0.586525	0.66519	1.04384	0.651224	0.751271	1.02991	0.603293	0.787982	0.942855	0.0250977	0.0375238	1.27423	918119700	1050400000	1120899000	1043200000	1131300000	1186099000	1080100000	1061900000	1029599000	1074100000	815260500	1034700000	1237200000	1288801000	1402600000	67.4	34.893	0	323.31
P77569	P77569	Mhp operon transcriptional activator	mhpR	sp|P77569|MHPR_ECOLI DNA-binding transcriptional activator MhpR OS=Escherichia coli (strain K12) OX=83333 GN=mhpR PE=4 SV=2	9	9	0.284782	0.827701	0.83963	0.00470491	0.00518901	0.229318	0.000133771	0.00122105	0.135277	0.00795946	0.0101818	0.541636	0.00139835	0.00334286	0.205513	0.00154173	0.010139	0.178618	84508990	58622020	60326030	59406980	62031000	48005010	33553990	36471010	38805990	12788000	10820000	18747990	17492000	9954305	9781294	32.1	31.322	0	25.007
P0A698	P0A698	UvrABC system protein A	uvrA	sp|P0A698|UVRA_ECOLI UvrABC system protein A OS=Escherichia coli (strain K12) OX=83333 GN=uvrA PE=1 SV=1	32	32	0.285345	0.827859	1.06321	0.00210469	0.00310722	1.34746	0.00501903	0.00879231	1.28992	0.0110095	0.0133249	1.23587	0.439739	0.60425	0.792806	0.00237984	0.0119319	1.39093	294540000	323339900	332660000	343750100	315019800	351629900	402279700	368470000	403449900	304689800	147580100	351090100	416849900	464350200	440450000	38.4	103.87	0	234.64
P76194	P76194	Cysteine desulfuration protein SufE	sufE	sp|P76194|SUFE_ECOLI Cysteine desulfuration protein SufE OS=Escherichia coli (strain K12) OX=83333 GN=sufE PE=1 SV=1	4	4	0.286482	0.829623	1.11994	0.00556841	0.00591628	1.27362	0.0455242	0.0416507	1.44871	0.126873	0.10699	1.0905	0.102047	0.132366	1.25186	0.384026	0.441334	1.07418	28578990	26950010	25247010	35152020	26227020	29627990	27801010	29801990	30436010	33102010	40347020	28564000	26483990	27812000	32720980	28.3	15.8	0	5.002
P20083	P20083	DNA topoisomerase 4 subunit B	parE	sp|P20083|PARE_ECOLI DNA topoisomerase 4 subunit B OS=Escherichia coli (strain K12) OX=83333 GN=parE PE=1 SV=3	10	10	0.286716	0.82878	1.08378	0.000651969	0.00243346	0.532084	0.0422305	0.0382227	0.311801	0.00215389	0.00422727	0.568439	0.00778449	0.0167643	0.45524	0.710715	0.805262	1.02284	15761990	16117000	18193000	19645990	16637000	18000000	10675000	9384597	8473600	6787104	6264102	10256000	16171000	16793990	18211000	15.7	70.243	0	9.9631
P37643	P37643	Inner membrane metabolite transport protein YhjE	yhjE	sp|P37643|YHJE_ECOLI Inner membrane metabolite transport protein YhjE OS=Escherichia coli (strain K12) OX=83333 GN=yhjE PE=1 SV=1	2	2	0.286869	0.827762	0.606654	0.772025	0.853743	1.23583	0.000230169	0.000892308	2.83159	0.901422	0.948434	1.09802	1.16991e-06	0	7.00044	0.263239	0.294401	1.42063	3869579	4282098	3950503	5052100	1241189	2330695	8551603	9429095	1074701	26922980	29544990	28232000	9636393	4933599	3947600	7	47.207	0	15.525
P0AAZ7	P0AAZ7	UPF0434 protein YcaR	ycaR	sp|P0AAZ7|YCAR_ECOLI UPF0434 protein YcaR OS=Escherichia coli (strain K12) OX=83333 GN=ycaR PE=1 SV=1	4	4	0.286925	0.826811	1.21389	0.392502	0.361295	0.905924	0.00416653	0.0075092	2.52293	0.259038	0.241479	0.859012	0.500041	0.679432	1.41127	0.381909	0.439197	1.2416	6578200	5412997	7699999	6488604	9830505	7688504	5056303	6105304	5629800	6360001	22602000	5361199	5705599	8194003	11225000	68.3	6.8549	0	4.2146
P0A715	P0A715	2-dehydro-3-deoxyphosphooctonate aldolase	kdsA	sp|P0A715|KDSA_ECOLI 2-dehydro-3-deoxyphosphooctonate aldolase OS=Escherichia coli (strain K12) OX=83333 GN=kdsA PE=1 SV=1	16	16	0.287882	0.828211	1.08713	0.00200881	0.00269663	1.73484	0.00171455	0.00585423	1.45811	0.000150725	0.00135922	1.9042	0.0420604	0.0560066	1.28383	0.0112854	0.0209573	1.55669	667379600	767210400	758919900	874159600	733609700	778520400	1402900000	1405501000	1360700000	1063600000	932540300	829009800	1064801000	1354300000	1016500000	69.4	30.832	0	212.85
P0A9M5	P0A9M5	Xanthine phosphoribosyltransferase	gpt	sp|P0A9M5|XGPT_ECOLI Xanthine-guanine phosphoribosyltransferase OS=Escherichia coli (strain K12) OX=83333 GN=gpt PE=1 SV=1	5	5	0.2881	0.827747	1.08844	0.0382208	0.0308799	1.15108	0.34468	0.321613	1.14511	0.0645967	0.0572509	1.14733	0.0282274	0.0419886	1.62727	0.00764481	0.0167519	1.30557	43910000	45148980	43200990	42858980	47527030	54216990	55471030	46208000	50464990	69296990	93516020	56948970	52132000	62204040	58773030	38.2	16.97	0	7.3512
P00894	P00894	Acetolactate synthase isozyme 3 small subunit	ilvH	sp|P00894|ILVH_ECOLI Acetolactate synthase isozyme 3 small subunit OS=Escherichia coli (strain K12) OX=83333 GN=ilvH PE=1 SV=3	11	11	0.288104	0.826633	1.21081	0.203697	0.148539	1.27688	0.0895469	0.0719391	1.41014	0.715045	0.815561	1.06097	0.311318	0.403655	1.27824	0.184025	0.208646	1.36974	313529900	519340200	409460200	527389900	439310200	510820000	406950200	464150100	421550100	472120200	700179800	421230300	438300200	689769900	566740000	74.2	17.977	0	179.78
P0A8N0	P0A8N0	Macrodomain Ter protein	matP	sp|P0A8N0|MATP_ECOLI Macrodomain Ter protein OS=Escherichia coli (strain K12) OX=83333 GN=matP PE=1 SV=1	4	4	0.28815	0.825688	1.09529	0.16836	0.119376	0.533957	0.734705	0.815288	0.869797	0.0292549	0.0288736	0.553797	0.00949332	0.0174854	0.321301	0.087941	0.104286	0.705717	13785010	12127000	13859000	16174990	13143000	14320000	5769696	10239000	6660901	5048701	2651401	5740798	8213200	7890598	12565000	31.3	17.693	0	5.9449
P69829	P69829	Nitrogen regulatory protein	ptsN	sp|P69829|PTSN_ECOLI Nitrogen regulatory protein OS=Escherichia coli (strain K12) OX=83333 GN=ptsN PE=1 SV=1	7	7	0.288433	0.825675	1.18833	0.92188	0.958949	1.00775	0.0426024	0.0386888	1.58537	0.0886626	0.0755476	0.787697	0.784934	0.905008	1.03319	0.0310289	0.0457471	1.37172	189519900	150900000	177819900	248350100	162479900	211480100	119820100	158320000	131020000	169310100	211110000	156920000	222069900	270780100	218280000	47.2	17.959	0	74.377
P05791	P05791	Dihydroxy-acid dehydratase	ilvD	sp|P05791|ILVD_ECOLI Dihydroxy-acid dehydratase OS=Escherichia coli (strain K12) OX=83333 GN=ilvD PE=1 SV=5	17	17	0.288526	0.82496	0.955827	0.00169728	0.00259169	0.745441	0.000236262	0.000852941	0.649732	0.000714384	0.00181982	0.784333	0.0483262	0.0665804	0.577465	0.188315	0.214419	1.07833	156899900	153160000	151090100	149360000	137300000	154609900	126320000	117759900	117770100	102239900	60352030	113309900	151830000	168730000	177710000	31.8	65.531	0	237.63
P0A8C1	P0A8C1	UPF0145 protein YbjQ	ybjQ	sp|P0A8C1|YBJQ_ECOLI UPF0145 protein YbjQ OS=Escherichia coli (strain K12) OX=83333 GN=ybjQ PE=1 SV=1	2	2	0.290513	0.830833	1.09915	0.401778	0.373713	0.9305	0.0823736	0.067097	1.21906	0.0270968	0.0273278	1.24041	0.18193	0.22148	1.52543	0.42198	0.492063	1.07748	148860100	127340000	156210100	160070000	169940000	144549900	174150000	182730100	177589900	175449900	363820100	164659900	148220100	144460000	172990000	17.8	11.437	0	97.471
P0A9P4	P0A9P4	Thioredoxin reductase	trxB	sp|P0A9P4|TRXB_ECOLI Thioredoxin reductase OS=Escherichia coli (strain K12) OX=83333 GN=trxB PE=1 SV=2	12	12	0.292742	0.836032	0.93619	0.000301158	0	0.689882	0.0644237	0.0541668	0.818514	0.0204636	0.022187	0.872317	0.427835	0.589681	0.819037	0.245263	0.274168	0.883818	146360000	160209900	156820100	138249900	158780100	137450100	141289900	130350000	132529900	149330000	81013980	167000000	128570000	122050100	161780100	59.5	34.623	0	79.893
P0A991	P0A991	Fructose-bisphosphate aldolase class 1	fbaB	sp|P0A991|ALF1_ECOLI Fructose-bisphosphate aldolase class 1 OS=Escherichia coli (strain K12) OX=83333 GN=fbaB PE=1 SV=2	19	19	0.293109	0.836897	1.07452	0.0011205	0.00224784	1.41121	0.001037	0.00351429	1.50199	0.0247924	0.0258725	1.18903	0.00390416	0.00684553	1.91025	0.669941	0.774414	1.03492	959209500	907929500	1042901000	976419900	1131400000	1020000000	1199201000	1089700000	1168400000	1723700000	2254601000	1629101000	938259800	943979600	1136700000	65.7	38.109	0	323.31
P69797	P69797	PTS system mannose-specific EIIAB component;Mannose-specific phosphotransferase enzyme IIA component;Mannose-specific phosphotransferase enzyme IIB component	manX	sp|P69797|PTNAB_ECOLI PTS system mannose-specific EIIAB component OS=Escherichia coli (strain K12) OX=83333 GN=manX PE=1 SV=2	20	20	0.293563	0.837163	1.08242	0.000219817	0	0.434244	1.70764e-05	0	0.254149	0.381133	0.392843	0.966408	0.00146567	0.00322759	0.205658	7.33975e-05	0	0.249776	378359900	392319800	418280200	382310100	443680300	464210200	376140000	397200000	375090200	96297950	54581980	102750000	103029900	85192050	110230100	72.1	35.047	0	169.41
P42599	P42599	Uncharacterized oxidoreductase YgjR	ygjR	sp|P42599|YGJR_ECOLI Uncharacterized oxidoreductase YgjR OS=Escherichia coli (strain K12) OX=83333 GN=ygjR PE=3 SV=3	7	7	0.293808	0.836714	0.89048	0.000373984	0.0010628	0.351373	5.61281e-05	0	0.231076	0.0133782	0.0148929	0.674845	0.000542249	0.00585	0.158361	7.75943e-05	0.00302439	0.221653	209860000	219630100	266049900	229809900	203720000	184950100	174630000	148560100	145270100	49025970	27449010	36189020	49754020	56775990	47272980	22.6	36.214	0	69.66
P37774	P37774	Uncharacterized amino-acid ABC transporter ATP-binding protein YecC	yecC	sp|P37774|TCYN_ECOLI L-cystine transport system ATP-binding protein TcyN OS=Escherichia coli (strain K12) OX=83333 GN=tcyN PE=1 SV=2	7	7	0.295096	0.838686	1.11505	0.0281732	0.025376	1.25224	0.0931681	0.0736063	1.20673	0.00815602	0.0101097	1.29603	0.625384	0.803828	0.912888	0.0179263	0.0293214	1.52718	62117000	65468960	57373000	80610020	65138980	61603000	78460950	85603010	75623980	45965020	78505980	49189970	79070020	112680000	93274990	34	27.677	0	40.807
P0AES0	P0AES0	Bifunctional glutathionylspermidine synthetase/amidase;Glutathionylspermidine amidase;Glutathionylspermidine synthetase	gss	sp|P0AES0|GSP_ECOLI Bifunctional glutathionylspermidine synthetase/amidase OS=Escherichia coli (strain K12) OX=83333 GN=gss PE=1 SV=1	8	8	0.295856	0.839278	0.900594	0.252694	0.194438	0.888721	0.496891	0.539633	0.918967	0.0165812	0.018545	0.7615	0.452749	0.618354	0.899731	0.0818482	0.0981542	0.771902	37796000	32103000	34833000	27926000	35920990	30776020	29247990	25724000	24806010	35221990	24747010	35317020	26106010	22928000	32476020	17.8	70.531	0	10.294
P0A812	P0A812	Holliday junction ATP-dependent DNA helicase RuvB	ruvB	sp|P0A812|RUVB_ECOLI Holliday junction ATP-dependent DNA helicase RuvB OS=Escherichia coli (strain K12) OX=83333 GN=ruvB PE=1 SV=1	7	7	0.295891	0.838164	1.12507	0.0299619	0.0260613	1.34186	0.00151896	0.0057386	1.74415	0.993816	0.99717	0.999248	0.00102152	0.00406957	1.89181	0.0225401	0.0345025	1.42177	17604010	20892010	18299990	24820010	18668990	20685010	19106990	21343000	16467000	35600020	39245990	32615990	23647990	31342010	26098000	27.4	37.173	0	12.971
P12995	P12995	Adenosylmethionine-8-amino-7-oxononanoate aminotransferase	bioA	sp|P12995|BIOA_ECOLI Adenosylmethionine-8-amino-7-oxononanoate aminotransferase OS=Escherichia coli (strain K12) OX=83333 GN=bioA PE=1 SV=2	9	9	0.296031	0.837748	0.89205	0.0030993	0.00478613	1.81629	0.447021	0.4656	0.913707	0.0014953	0.0030719	2.09334	0.0754408	0.102613	1.62555	0.792033	0.86462	1.04151	33795020	43050020	43918010	37138000	32646010	37410020	91484940	80628030	79461020	72401980	45290020	83697980	49875990	33425010	43301000	24.9	47.335	0	57.628
P23909	P23909	DNA mismatch repair protein MutS	mutS	sp|P23909|MUTS_ECOLI DNA mismatch repair protein MutS OS=Escherichia coli (strain K12) OX=83333 GN=mutS PE=1 SV=1	17	17	0.29706	0.840328	0.91418	0.00100177	0.00198758	0.517533	0.00969349	0.0126172	0.675835	0.00545852	0.00870061	0.663075	0.348105	0.458399	0.821801	0.597754	0.705375	0.956025	37554020	38767990	45668030	33993980	37986000	39337980	27535990	28572000	24637000	41272010	23559990	37950010	40322010	35064020	41090980	25.7	95.246	0	22.163
P76149	P76149	Succinate semialdehyde dehydrogenase [NAD(P)+] Sad	sad	sp|P76149|SAD_ECOLI Succinate semialdehyde dehydrogenase [NAD(P)+] Sad OS=Escherichia coli (strain K12) OX=83333 GN=sad PE=1 SV=2	4	4	0.297554	0.840433	1.3401	0.237205	0.178994	0.723909	0.0123043	0.0147218	0.414982	0.278498	0.26319	1.47708	0.593175	0.778402	1.18303	0.386747	0.445443	0.742988	9648006	6560396	12435000	9798003	16766990	11530000	17359010	17654000	8276706	13132000	14146990	7014603	4347401	7445002	9973907	9.5	49.717	0	6.6258
P76576	P76576	UPF0070 protein YfgM	yfgM	sp|P76576|YFGM_ECOLI UPF0070 protein YfgM OS=Escherichia coli (strain K12) OX=83333 GN=yfgM PE=3 SV=1	10	10	0.297609	0.839325	0.953603	0.0217433	0.0208337	1.13429	0.0315613	0.0301826	1.25481	0.0964352	0.0822732	0.929804	0.681815	0.844004	1.09867	0.0432343	0.0612241	1.32663	147780000	149560000	135980000	131750100	137190100	144190000	131199900	133270000	138170100	136220100	240620100	121600100	161659900	195630000	221880000	65.5	22.176	0	178.88
P77748	P77748	Uncharacterized protein YdiJ	ydiJ	sp|P77748|YDIJ_ECOLI Uncharacterized protein YdiJ OS=Escherichia coli (strain K12) OX=83333 GN=ydiJ PE=4 SV=1	30	30	0.298397	0.840047	0.920831	0.418232	0.396277	0.938645	0.282596	0.254416	0.920087	0.00890619	0.0110515	0.676452	0.940445	0.974281	0.979317	0.793605	0.865649	1.02428	269099900	324519800	332550000	282640000	291849900	274890000	225000000	209360000	190830100	357990000	182470100	417560300	297430200	299339900	350520100	35.5	113.25	0	169.79
P0AF08	P0AF08	Protein mrp	mrp	sp|P0AF08|APBC_ECOLI Iron-sulfur cluster carrier protein OS=Escherichia coli (strain K12) OX=83333 GN=mrp PE=3 SV=1	10	10	0.298957	0.841311	0.911451	0.356252	0.3124	1.0969	0.115758	0.0911747	0.867502	0.570141	0.659206	0.963556	0.223565	0.274523	1.29185	0.173535	0.198422	1.13734	159749900	178610000	196539900	153900000	178810100	154300000	171049900	169810000	172719900	254360000	165389900	287390000	186900000	199190100	221610000	32.2	39.938	0	55.964
P33363	P33363	Periplasmic beta-glucosidase	bglX	sp|P33363|BGLX_ECOLI Periplasmic beta-glucosidase OS=Escherichia coli (strain K12) OX=83333 GN=bglX PE=3 SV=2	27	27	0.300258	0.845083	1.04151	0.0355943	0.0292571	1.14042	0.154891	0.122994	1.1647	0.631968	0.733022	1.01846	0.0405026	0.054335	1.36855	0.231852	0.258299	1.13716	136080000	134490000	142729900	148010000	147290000	135370000	132040100	144020000	145110000	167380000	231640100	172690000	135430000	184340000	153860000	40.7	83.459	0	65.701
P0A940	P0A940	Outer membrane protein assembly factor BamA	bamA	sp|P0A940|BAMA_ECOLI Outer membrane protein assembly factor BamA OS=Escherichia coli (strain K12) OX=83333 GN=bamA PE=1 SV=1	50	50	0.300827	0.845507	1.05147	0.0534798	0.039258	0.902556	0.0197071	0.0205981	0.747521	0.0624843	0.056642	0.895728	0.621989	0.803654	1.2086	0.950882	0.969242	0.995491	1498299000	1620399000	1665201000	1769199000	1647200000	1612699000	1347500000	1455800000	1481100000	1355201000	3906397000	1348201000	1472799000	1790800000	1512200000	66.3	90.552	0	323.31
P0A6S5	P0A6S5	Cell division protein FtsB	ftsB	sp|P0A6S5|FTSB_ECOLI Cell division protein FtsB OS=Escherichia coli (strain K12) OX=83333 GN=ftsB PE=1 SV=1	1	1	0.301105	0.845028	1.586	0.27021	0.213931	1.49743	0.69346	0.778665	1.17359	0.722767	0.822578	1.10047	0.0827226	0.111276	2.14444	0.986111	0.991115	1.00574	1646911	1507419	3311694	3538385	5069415	1828531	2203873	2370729	2097080	3632699	6684597	3338801	1523487	1921689	2856898	13.6	11.622	0	4.409
P45795	P45795	Uncharacterized protein YrdB	yrdB	sp|P45795|YRDB_ECOLI Uncharacterized protein YrdB OS=Escherichia coli (strain K12) OX=83333 GN=yrdB PE=4 SV=1	1	1	0.301576	0.844984	1.70798	0.0693048	0.0495306	2.97509	0.115573	0.091165	1.70514	0.173063	0.151613	1.53888	0.0656859	0.0878812	3.31495	0.45966	0.535131	0.750467	1982008	1092300	1107059	1036956	4009709	2872046	2332174	1469134	2549253	2290128	10051090	3792950	572480	1517981	1165700	16.5	10.007	0.00377	2.0861
P0A9A6	P0A9A6	Cell division protein FtsZ	ftsZ	sp|P0A9A6|FTSZ_ECOLI Cell division protein FtsZ OS=Escherichia coli (strain K12) OX=83333 GN=ftsZ PE=1 SV=1	27	27	0.301843	0.844512	1.06566	0.00843541	0.00881402	0.733099	0.517425	0.568584	0.946185	0.0137329	0.0153734	0.763609	0.32606	0.425114	1.08204	0.896314	0.93833	0.988855	860100400	1026600000	936659800	969899500	1005600000	1026201000	663540200	752139700	737870100	1110501000	939559500	1004201000	821160300	965760200	1008399000	92.7	40.323	0	323.31
P08956	P08956	Type I restriction enzyme EcoKI R protein	hsdR	sp|P08956|T1RK_ECOLI Type I restriction enzyme EcoKI R protein OS=Escherichia coli (strain K12) OX=83333 GN=hsdR PE=3 SV=3	2	2	0.301969	0.843561	0.571129	0.407258	0.381046	0.557592	0.119383	0.0934855	0.331507	0.332425	0.326904	0.443833	0.536695	0.723181	0.739949	0.179278	0.204522	0.304682	20248010	5173700	5966303	6947597	4639900	3612000	5948597	1163392	7896003	7209327	5110450	6872903	1382743	1513236	8448498	1.9	134.09	0	4.0611
P06993	P06993	HTH-type transcriptional regulator MalT	malT	sp|P06993|MALT_ECOLI HTH-type transcriptional regulator MalT OS=Escherichia coli (strain K12) OX=83333 GN=malT PE=1 SV=2	15	15	0.302695	0.844266	0.946581	0.000484473	0.00162896	0.426058	0.0009297	0.00369925	0.4131	0.000441529	0.00147486	0.637687	0.977236	0.988649	1.00477	0.0216235	0.0332937	0.771445	155399900	178310100	166810100	161000000	162030100	150280000	107280000	108230000	103230000	187470000	123960000	201759900	116080000	128469900	142300000	18.3	103.12	0	38.785
P45537	P45537	Uncharacterized protein YhfK	yhfK	sp|P45537|YHFK_ECOLI Uncharacterized protein YhfK OS=Escherichia coli (strain K12) OX=83333 GN=yhfK PE=3 SV=2	5	5	0.302775	0.843583	2.53165	0.305071	0.252479	2.55797	0.192219	0.157308	3.4305	0.299347	0.287397	2.5525	0.253673	0.314139	2.86544	0.196251	0.220297	3.39262	919986	11514990	7766803	11563000	11364000	10160000	10082000	11483010	11819000	14219000	10454010	13022990	14192010	13284010	17041990	8.7	79.971	0	5.2118
P33012	P33012	DNA gyrase inhibitor	sbmC	sp|P33012|SBMC_ECOLI DNA gyrase inhibitor OS=Escherichia coli (strain K12) OX=83333 GN=sbmC PE=1 SV=1	5	5	0.305895	0.854023	1.14906	0.00903878	0.00935099	1.8583	0.0216311	0.0228005	1.70717	0.000939364	0.00318725	1.85041	0.347285	0.457652	1.18527	0.0511967	0.0691531	1.24858	26064000	28193020	30715980	34094980	26385990	38063980	48366980	57697040	51245020	34801000	42711000	25284990	33983020	40062010	32269980	34.4	18.081	0	144.08
P0ADE4	P0ADE4	Translocation and assembly module TamA	tamA	sp|P0ADE4|TAMA_ECOLI Translocation and assembly module subunit TamA OS=Escherichia coli (strain K12) OX=83333 GN=tamA PE=1 SV=1	20	20	0.306213	0.85439	1.09489	0.00909697	0.00931398	1.21107	0.0220108	0.0230278	1.43904	0.0207961	0.0225375	1.22911	0.228441	0.282447	1.62599	0.188921	0.215135	1.26587	26394020	24825990	23201000	30936990	26129000	24684990	29415010	33068020	29021000	26579990	79047030	31105020	25371010	41316010	29419010	40	64.795	0	73.547
P32681	P32681	Uncharacterized protein YjaH	yjaH	sp|P32681|YJAH_ECOLI Uncharacterized protein YjaH OS=Escherichia coli (strain K12) OX=83333 GN=yjaH PE=4 SV=1	2	2	0.306538	0.854672	0.180116	0.17341	0.124437	0.0863041	0.157337	0.125439	0.0777482	0.143879	0.123595	0.0575091	0.243155	0.30274	0.126138	0.277368	0.311322	6.31982	1376902	122810000	91983040	6336509	4373857	3279344	433311	2129877	3205529	3672207	6067734	1400958	148430100	236610000	111790000	8.2	26.317	0.0033223	2.1849
P77649	P77649	UPF0061 protein YdiU	ydiU	sp|P77649|SELO_ECOLI Protein adenylyltransferase SelO OS=Escherichia coli (strain K12) OX=83333 GN=selO PE=1 SV=1	9	9	0.307283	0.855725	0.899768	0.00175188	0.00254808	1.83217	0.00896512	0.0114312	1.38455	0.00126205	0.00283688	1.96357	0.000206213	0.00150943	2.59196	0.0955261	0.114154	1.26362	15514010	18496990	15089010	16094000	15108010	12971990	28755000	33608020	33920980	42608020	39482000	44820990	17493990	23520000	21233010	23.6	54.381	0	11.975
P0AGE6	P0AGE6	Chromate reductase	chrR	sp|P0AGE6|CHRR_ECOLI Quinone reductase OS=Escherichia coli (strain K12) OX=83333 GN=chrR PE=1 SV=1	9	9	0.307603	0.855488	1.13714	0.00034071	0.000514851	3.22559	9.31393e-05	0.00148718	3.56632	0.00141896	0.00265781	2.06799	0.180669	0.220271	2.05772	0.00322448	0.0139848	2.67244	66003010	58536980	51237030	68786020	56630030	74726020	109009900	121110100	132610000	92394990	282680000	66038010	122000100	196359900	157720000	55.9	20.375	0	258.02
P12998	P12998	8-amino-7-oxononanoate synthase	bioF	sp|P12998|BIOF_ECOLI 8-amino-7-oxononanoate synthase OS=Escherichia coli (strain K12) OX=83333 GN=bioF PE=1 SV=1	8	8	0.308433	0.856951	0.730448	0.649327	0.739758	0.908236	0.0501688	0.0441107	0.518402	0.451838	0.490865	1.2348	0.996654	0.997095	0.998127	0.25741	0.287924	0.764759	36230000	21884990	19015010	22695990	12509010	20696990	34552980	22172990	37050020	35327990	11726000	36190980	20951010	18511010	17387990	21.6	41.594	0	6.7411
P24252	P24252	Uncharacterized protein YbgA	ybgA	sp|P24252|YBGA_ECOLI Uncharacterized protein YbgA OS=Escherichia coli (strain K12) OX=83333 GN=ybgA PE=4 SV=1	6	6	0.308879	0.856991	1.19542	0.00297611	0.0045692	2.54104	0.00400966	0.00736929	2.69977	0.000966701	0.003125	3.37136	0.00430791	0.00782329	2.54561	0.0440612	0.062638	1.62825	14988010	9699804	10713000	14873010	11847000	15100000	41965000	35728980	39804010	27658000	35335980	26288010	18349990	22898010	16000990	36.1	20.211	0	10.368
P0A9F1	P0A9F1	Transcriptional regulator MntR	mntR	sp|P0A9F1|MNTR_ECOLI Transcriptional regulator MntR OS=Escherichia coli (strain K12) OX=83333 GN=mntR PE=1 SV=1	3	3	0.309162	0.856825	1.05084	0.380063	0.34337	1.05045	0.0159261	0.0180356	1.33427	0.00664631	0.00897913	1.25474	0.0208579	0.0355385	1.38594	0.923682	0.954241	1.01192	24014000	26748990	27120000	28242000	26599010	26909990	32763010	33600020	31261020	33690010	42075000	32717000	21067000	29383020	29161000	24.5	17.64	0	6.4987
P0AB98	P0AB98	ATP synthase subunit a	atpB	sp|P0AB98|ATP6_ECOLI ATP synthase subunit a OS=Escherichia coli (strain K12) OX=83333 GN=atpB PE=1 SV=1	1	1	0.309541	0.856602	0.803741	0.254208	0.195791	0.790839	0.182013	0.147189	0.88463	0.783516	0.871257	1.02402	0.0121781	0.0234828	1.84474	0.246102	0.275153	0.796804	15501990	12965000	13676000	8465896	15718000	10725010	12929000	15971000	14293990	22822000	33544010	22539990	11604000	8333097	14380010	8.5	30.303	0	5.7995
P77712	P77712	Long-chain acyl-CoA thioesterase FadM	fadM	sp|P77712|FADM_ECOLI Long-chain acyl-CoA thioesterase FadM OS=Escherichia coli (strain K12) OX=83333 GN=fadM PE=1 SV=1	5	5	0.309837	0.856041	1.08045	0.0103585	0.0104724	2.3278	0.0125475	0.0152449	2.60438	0.00187873	0.00386747	1.75757	0.850423	0.936454	1.01541	0.15125	0.171313	1.29656	32393000	38398980	40133000	39586010	39012990	40769010	67892030	59596010	66983970	37065010	40154010	35115980	47515030	60070000	38120980	46.2	15.088	0	61.144
P03018	P03018	DNA helicase II	uvrD	sp|P03018|UVRD_ECOLI DNA helicase II OS=Escherichia coli (strain K12) OX=83333 GN=uvrD PE=1 SV=1	22	22	0.310082	0.85525	1.18614	0.0099688	0.0104447	1.91692	0.229664	0.195131	1.21876	0.339666	0.336042	1.16495	0.92492	0.970215	1.02477	0.122634	0.143323	1.32181	77424020	103180000	125149900	122130000	126119900	108320100	112120000	120050000	117430000	113930000	69567980	135750000	124230100	136260100	136399900	37.8	81.989	0	158.47
P0A9Q5	P0A9Q5	Acetyl-coenzyme A carboxylase carboxyl transferase subunit beta	accD	sp|P0A9Q5|ACCD_ECOLI Acetyl-coenzyme A carboxylase carboxyl transferase subunit beta OS=Escherichia coli (strain K12) OX=83333 GN=accD PE=1 SV=1	16	16	0.310192	0.854313	0.945819	0.0157731	0.0161007	1.11858	0.33991	0.31518	1.06559	0.00459481	0.008	0.870321	0.415767	0.576917	1.06873	0.000665293	0.0056	1.29033	358410100	351200200	361329900	363900000	309410000	341780200	303330100	325099900	304050000	426179900	332569800	391709800	438439900	476599800	467599800	47	33.322	0	137.11
P0AG44	P0AG44	50S ribosomal protein L17	rplQ	sp|P0AG44|RL17_ECOLI 50S ribosomal protein L17 OS=Escherichia coli (strain K12) OX=83333 GN=rplQ PE=1 SV=1	10	10	0.310383	0.853813	1.08027	0.000982198	0.00202532	1.76725	0.00564375	0.00849726	1.78651	0.0348139	0.0330077	1.3608	0.958428	0.977332	0.986205	0.0153339	0.0263459	1.69731	485130000	500900300	428770000	554299700	472280000	501750000	579150000	759639700	596790300	434120300	731710300	314619800	747969900	1010400000	674129800	53.5	14.364	0	112.43
P0ACP1	P0ACP1	Catabolite repressor/activator	cra	sp|P0ACP1|CRA_ECOLI Catabolite repressor/activator OS=Escherichia coli (strain K12) OX=83333 GN=cra PE=1 SV=1	10	10	0.311063	0.85377	1.02444	0.00549735	0.0059625	0.814641	0.000898647	0.00379923	0.807637	0.0018366	0.00349847	0.641122	0.0276077	0.0417044	0.669412	0.754825	0.838202	0.973723	168000100	170640000	179289900	176610100	179060100	174740000	103530000	124020000	105490000	125039900	91785030	134340000	152450100	159050000	195700100	40.7	37.999	0	72.1
P0ABF6	P0ABF6	Cytidine deaminase	cdd	sp|P0ABF6|CDD_ECOLI Cytidine deaminase OS=Escherichia coli (strain K12) OX=83333 GN=cdd PE=1 SV=1	9	9	0.311275	0.85319	0.823322	0.000747249	0.00225352	0.361857	9.3201e-05	0.00146835	0.235453	0.407824	0.427518	1.11657	0.000261466	0.00125	0.199001	0.000211273	0.00432787	0.258225	93835050	124660000	98591000	109290000	66657020	88351040	102310000	135390000	115900000	17385990	24494000	21342010	25726990	30431020	25364000	46.6	31.54	0	192.45
P43341	P43341	UDP-2,3-diacylglucosamine hydrolase	lpxH	sp|P43341|LPXH_ECOLI UDP-2,3-diacylglucosamine hydrolase OS=Escherichia coli (strain K12) OX=83333 GN=lpxH PE=1 SV=2	2	2	0.31192	0.853934	0.766664	0.448158	0.439224	0.809048	0.778001	0.849701	0.933945	0.0275882	0.0275361	0.478234	0.0961722	0.124945	0.608524	0.235921	0.26253	1.47538	1888199	935500	1672000	1245900	1116100	957100	715260	677840	666280	1013500	819560	801230	2354100	2683801	1501299	10	26.894	0.009673	1.7573
P06720	P06720	Alpha-galactosidase	melA	sp|P06720|AGAL_ECOLI Alpha-galactosidase OS=Escherichia coli (strain K12) OX=83333 GN=melA PE=1 SV=1	12	12	0.311992	0.852846	0.902312	0.677716	0.770105	0.971478	0.00178836	0.0057208	0.0386641	0.015106	0.0177664	1.26643	0.0184795	0.031973	0.381905	0.00723672	0.0150078	0.697721	72884960	70131000	66501040	74326980	56169970	59813000	81049970	87963980	96841970	33215020	16205000	35176990	53717980	50061030	42934010	31.7	50.657	0	68.162
P25534	P25534	2-octaprenyl-6-methoxyphenol hydroxylase	ubiH	sp|P25534|UBIH_ECOLI 2-octaprenyl-6-methoxyphenol hydroxylase OS=Escherichia coli (strain K12) OX=83333 GN=ubiH PE=1 SV=2	3	3	0.312641	0.854372	0.693146	0.790959	0.868714	1.09736	0.66414	0.751832	0.861402	0.329663	0.323074	1.43276	0.237037	0.295669	2.01802	0.615276	0.724088	0.836603	555070	1217300	426150	441160	439820	494210	1042100	813820	998601	2638101	671560	1335700	650390	476070	544530	11.5	42.288	0.0037807	2.1138
P0A959	P0A959	Glutamate-pyruvate aminotransferase AlaA	alaA	sp|P0A959|ALAA_ECOLI Glutamate-pyruvate aminotransferase AlaA OS=Escherichia coli (strain K12) OX=83333 GN=alaA PE=1 SV=1	10	10	0.312882	0.853957	1.07772	0.00434196	0.00518121	1.49011	0.681986	0.770191	0.986072	0.14691	0.126273	1.10676	0.000755926	0.00463366	2.55911	0.000590177	0.00625	1.25092	42123980	42257010	43107020	48956990	40257030	48734000	52196000	46261000	43080990	131060000	92560050	106010100	51082000	54992020	53469000	31.4	45.517	0	15.936
P00509	P00509	Aspartate aminotransferase	aspC	sp|P00509|AAT_ECOLI Aspartate aminotransferase OS=Escherichia coli (strain K12) OX=83333 GN=aspC PE=1 SV=1	28	28	0.313945	0.854797	0.928482	0.171891	0.122908	0.89333	0.00458238	0.00799211	0.694829	0.00944881	0.0114027	1.31702	0.099098	0.129208	1.42482	0.22887	0.255218	0.917203	2255999000	2735699000	2609100000	2426201000	2217199000	2395999000	3372802000	3262802000	3342700000	4327799000	2644599000	4069598000	2350300000	2368200000	2232300000	69.2	43.573	0	323.31
P33599	P33599	NADH-quinone oxidoreductase subunit C/D	nuoC	sp|P33599|NUOCD_ECOLI NADH-quinone oxidoreductase subunit C/D OS=Escherichia coli (strain K12) OX=83333 GN=nuoC PE=1 SV=3	28	28	0.314064	0.853815	0.939507	0.00037235	0.00106796	0.690729	0.000567548	0.00330348	0.652989	4.83159e-05	0	0.761137	0.427876	0.589371	0.893643	0.00615825	0.0153465	0.831555	759109600	779590500	777900000	653079900	778529600	750850100	601780200	581559900	580030300	707730300	547120300	848469700	646969800	603439700	678030500	55.5	68.235	0	169.18
[truncated: 1,361 more rows]
